# Supplementary material for: Palladium/N-heterocyclic carbene catalysed regio and diastereoselective reaction of ketones with allyl reagents via inner-sphere mechanism
Source: PubMed Central journal article supplement (PMC4906412; doi:10.1038/ncomms11806), 2016-06-10
Supplement: ncomms11806-s1.pdf [file ncomms11806-s1.pdf]

## Supplementary Figures

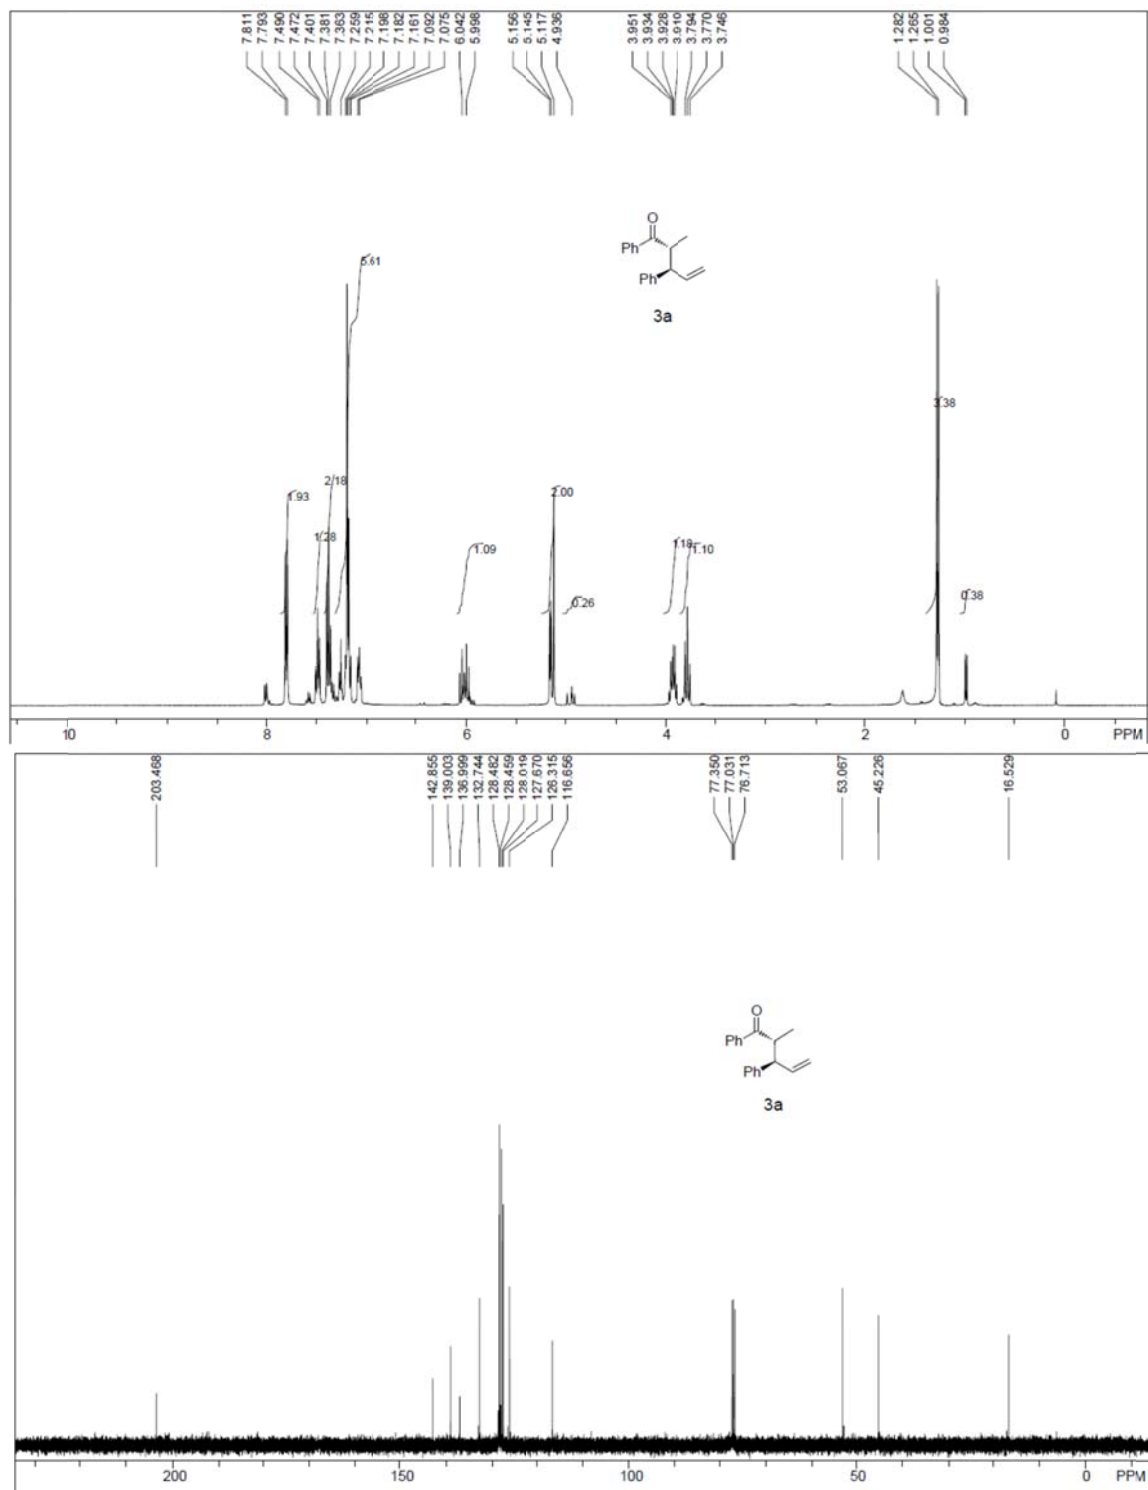

Supplementary Figure 1.  $^1\text{H}$  and  $^{13}\text{C}$  NMR spectrum for **3a**.

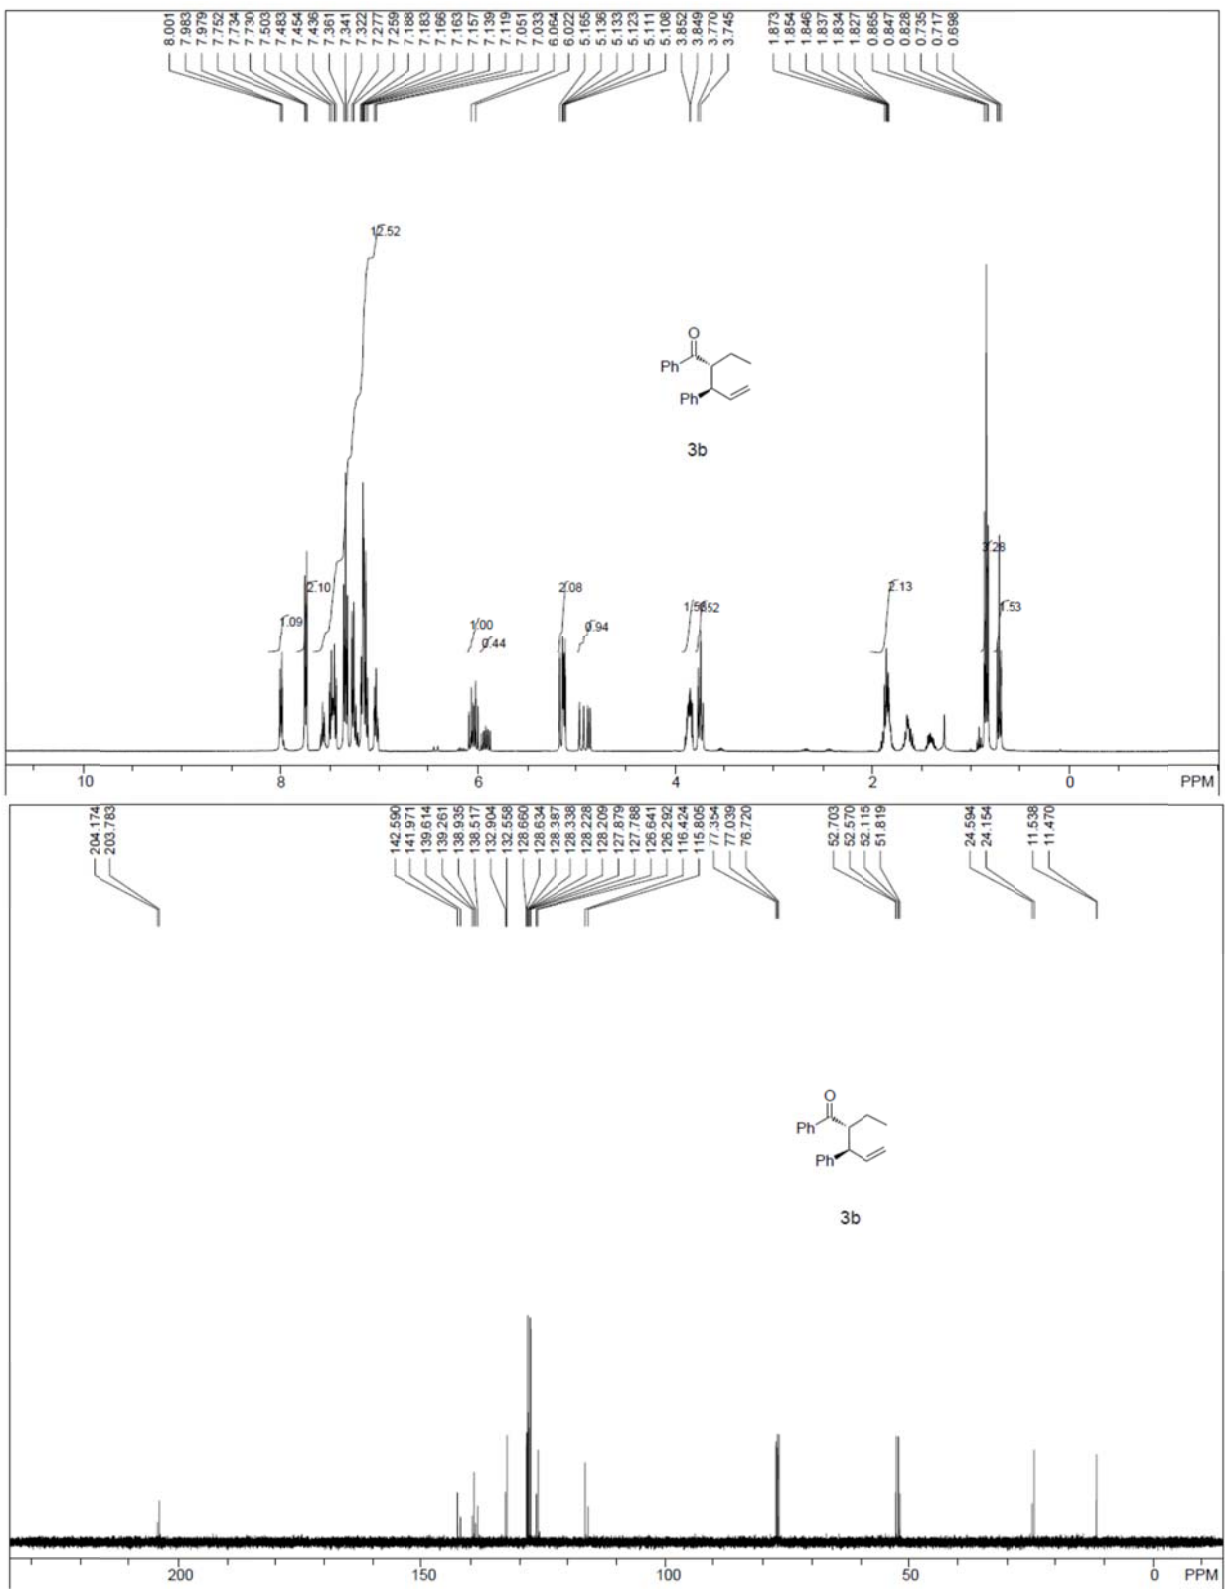

Supplementary Figure 2. <sup>1</sup>H and <sup>13</sup>C NMR spectrum for 3b.

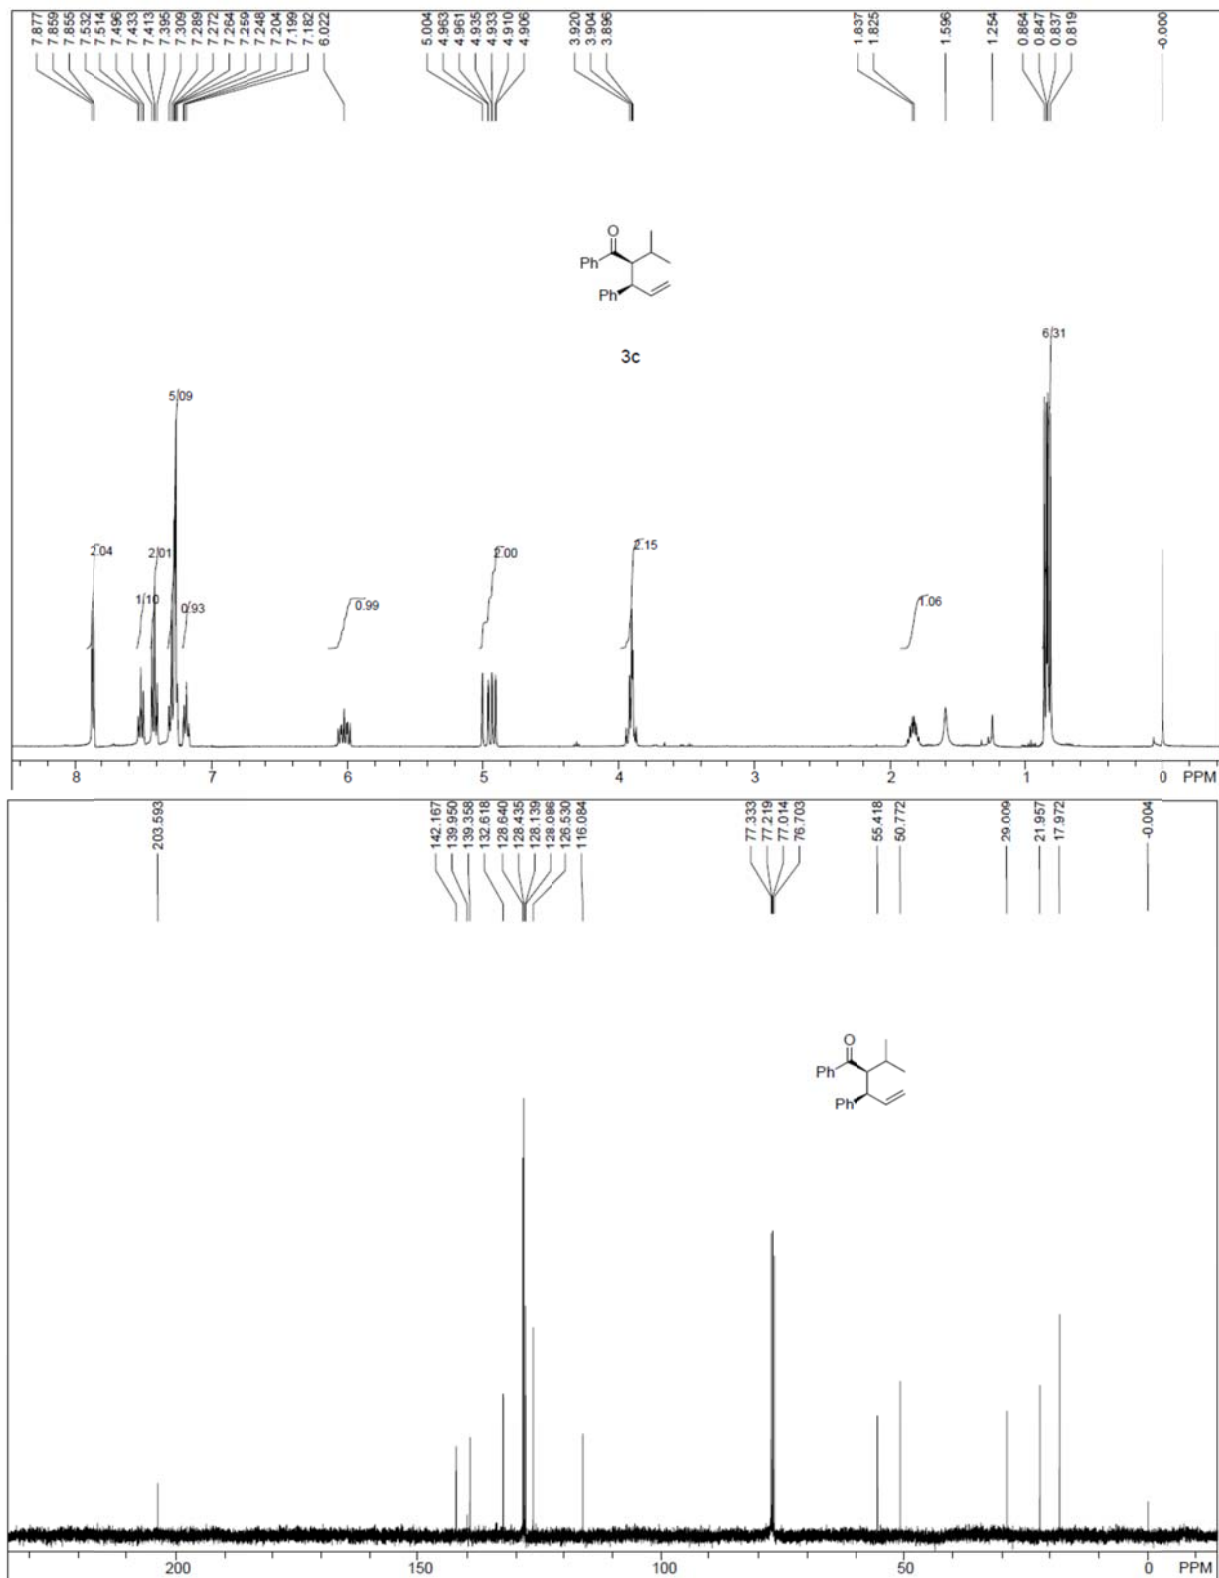

Supplementary Figure 3. <sup>1</sup>H and <sup>13</sup>C NMR spectrum for 3c.

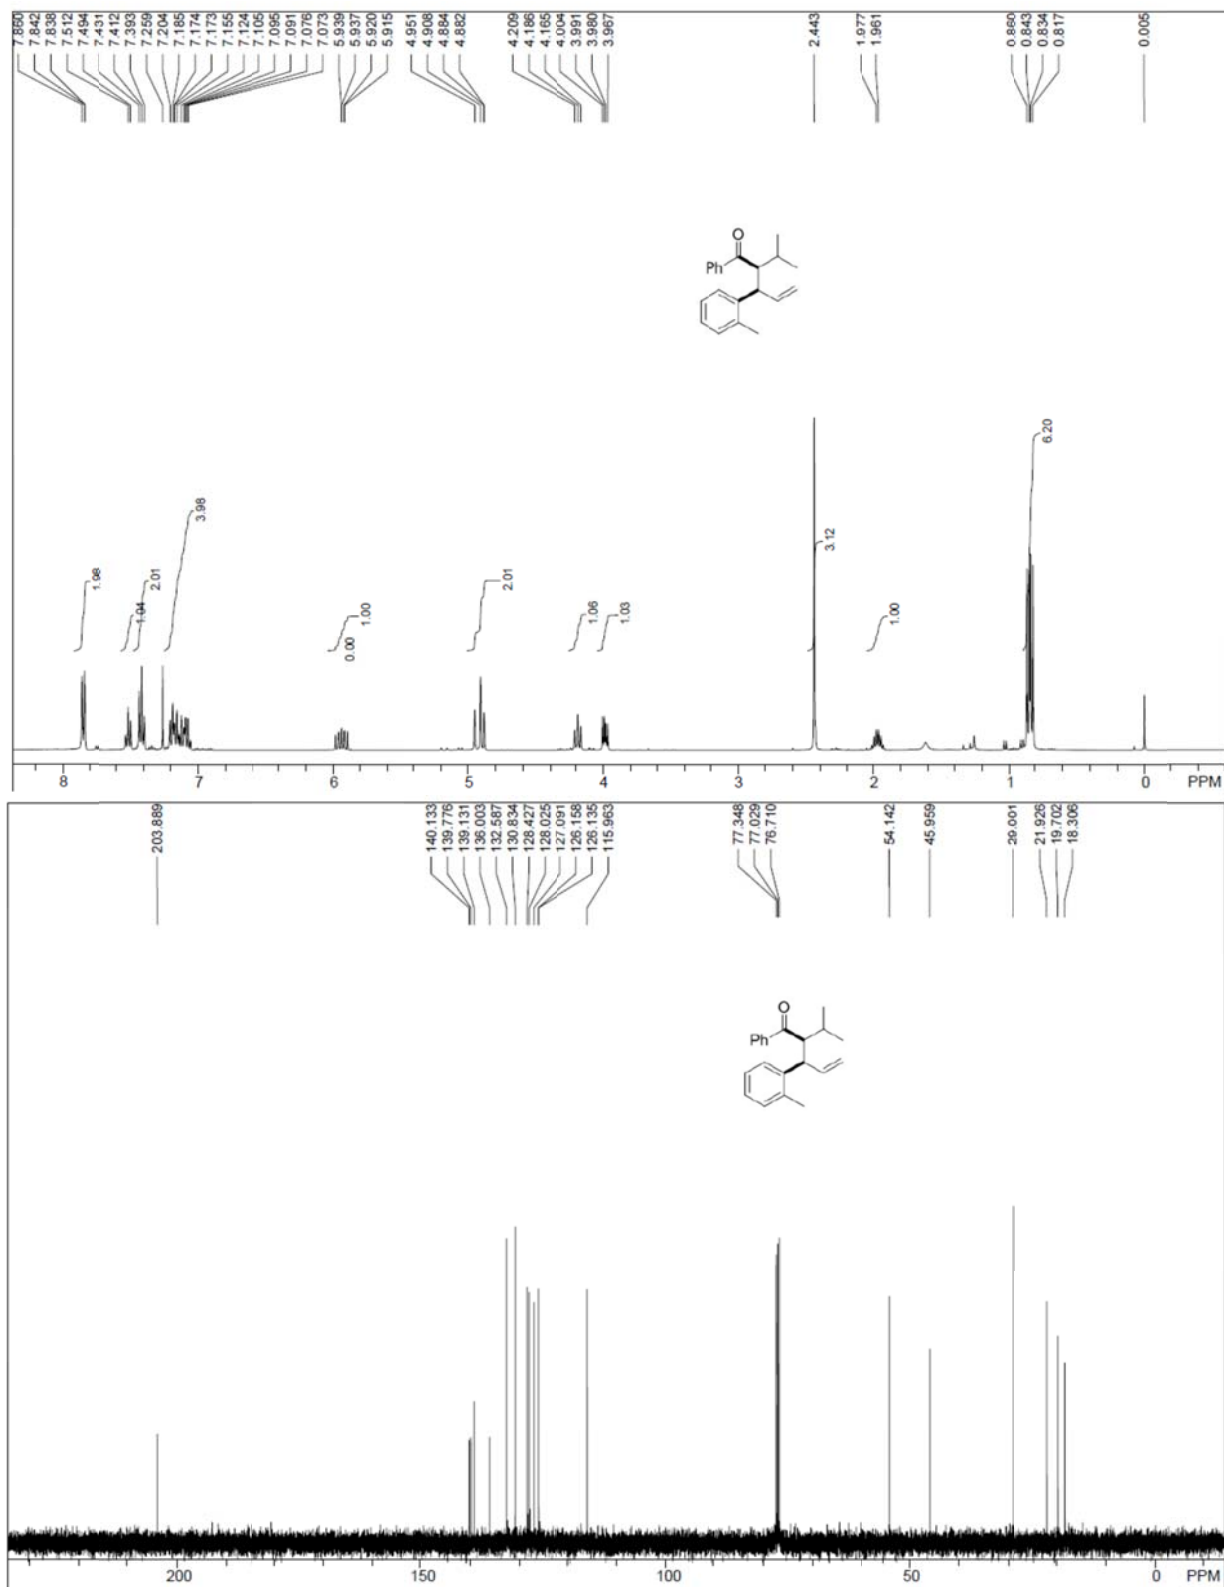

Supplementary Figure 4.  $^1\text{H}$  and  $^{13}\text{C}$  NMR spectrum for 3ca.

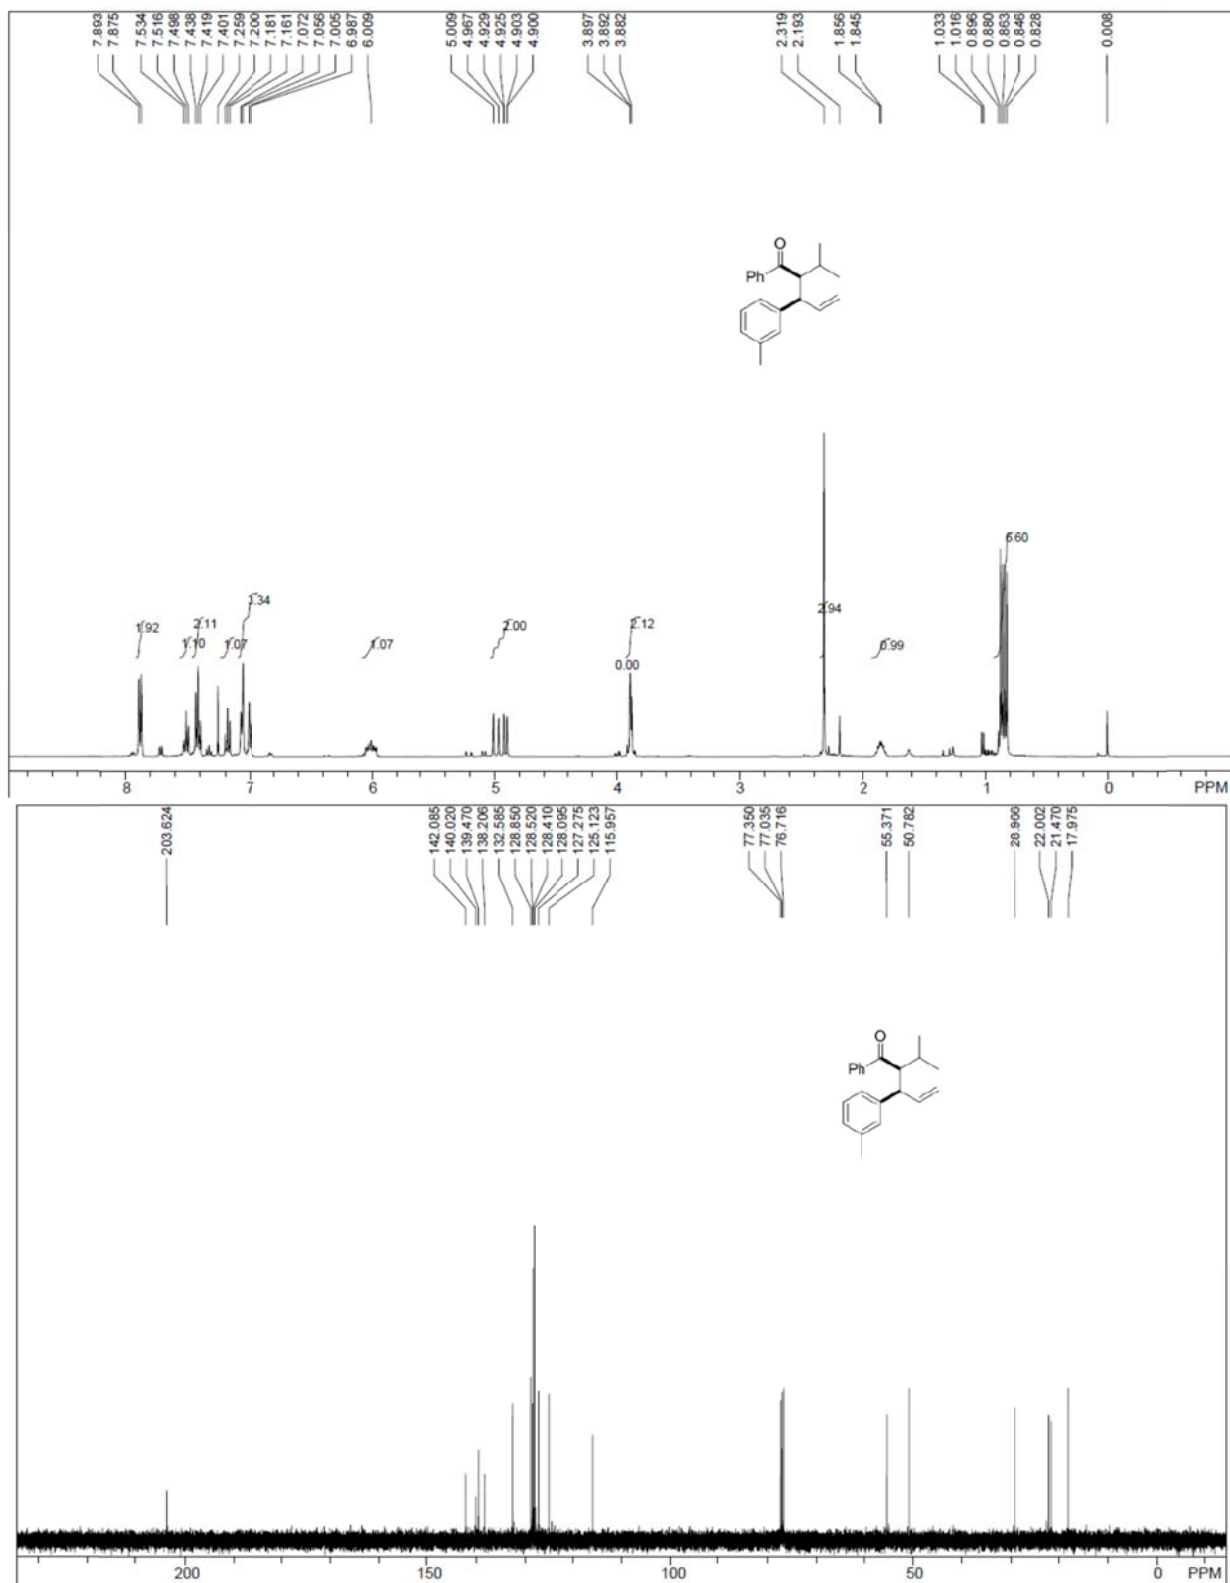

Supplementary Figure 5.  $^1\text{H}$  and  $^{13}\text{C}$  NMR spectrum for 3cb.

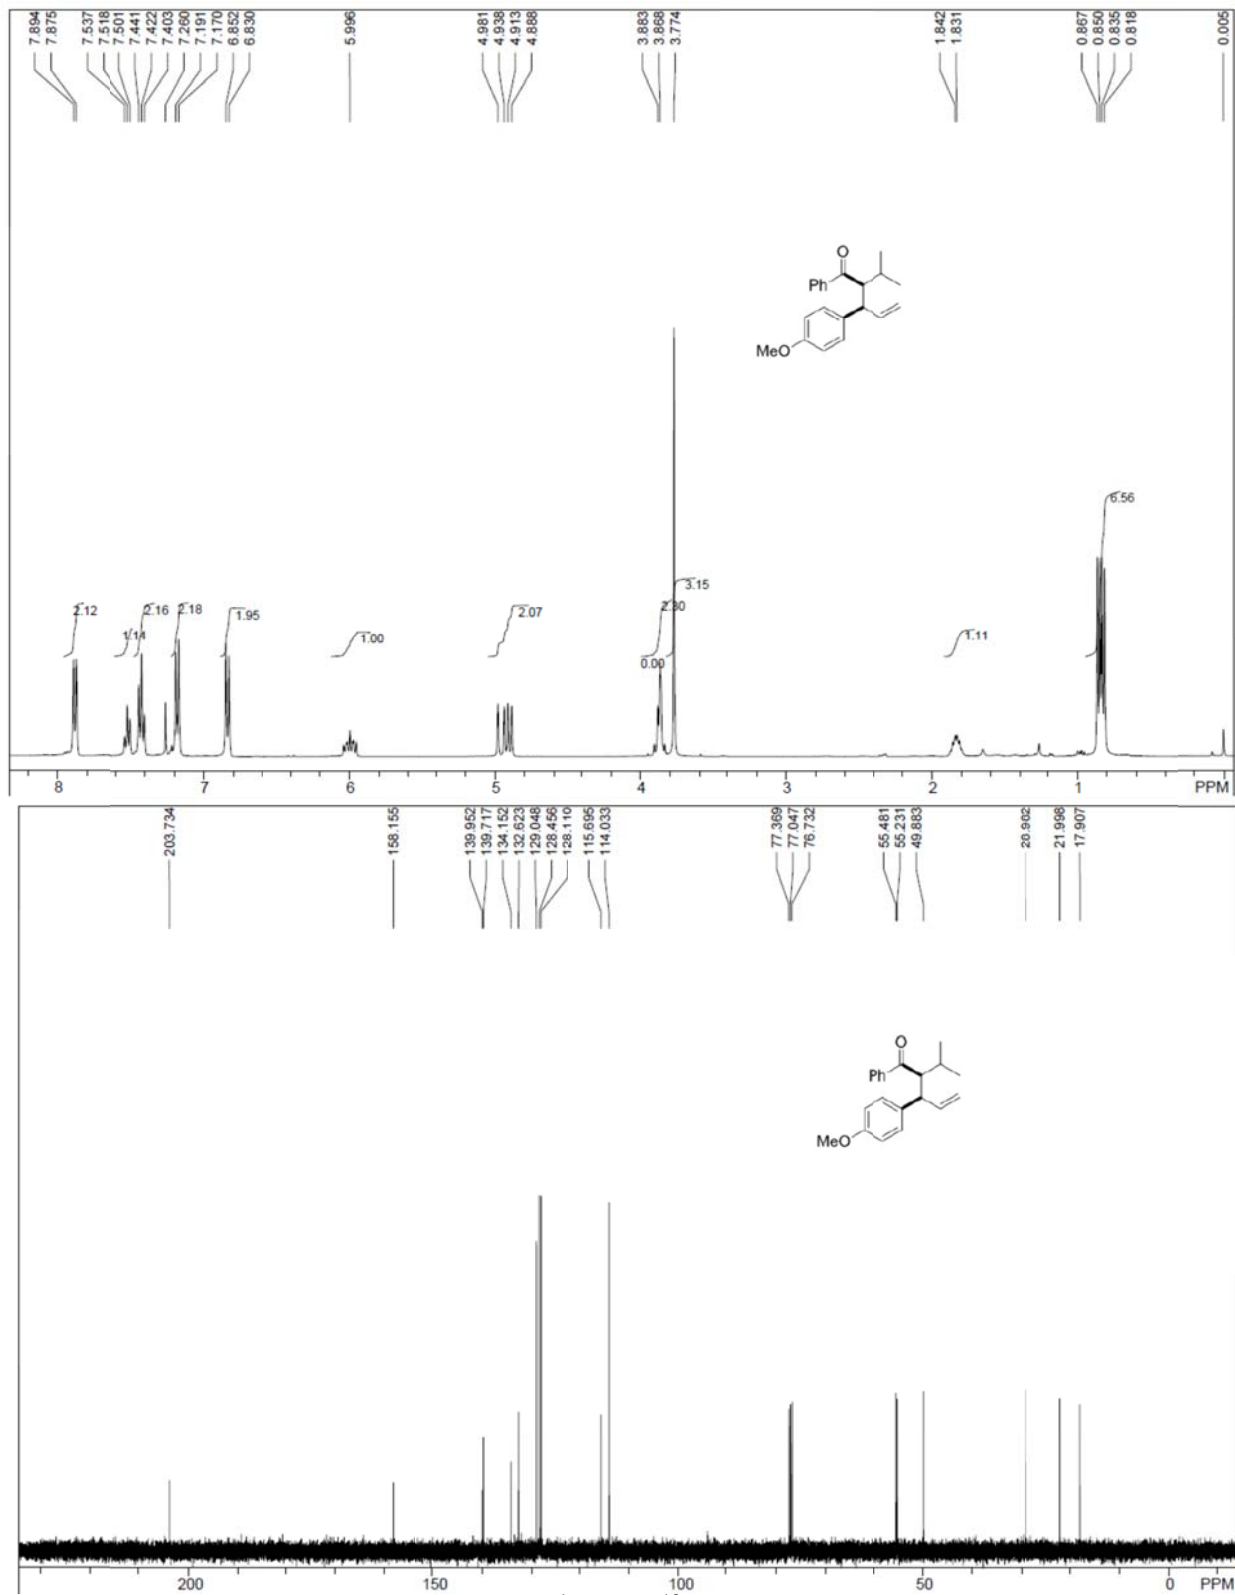

Supplementary Figure 6. <sup>1</sup>H and <sup>13</sup>C NMR spectrum for 3cc.

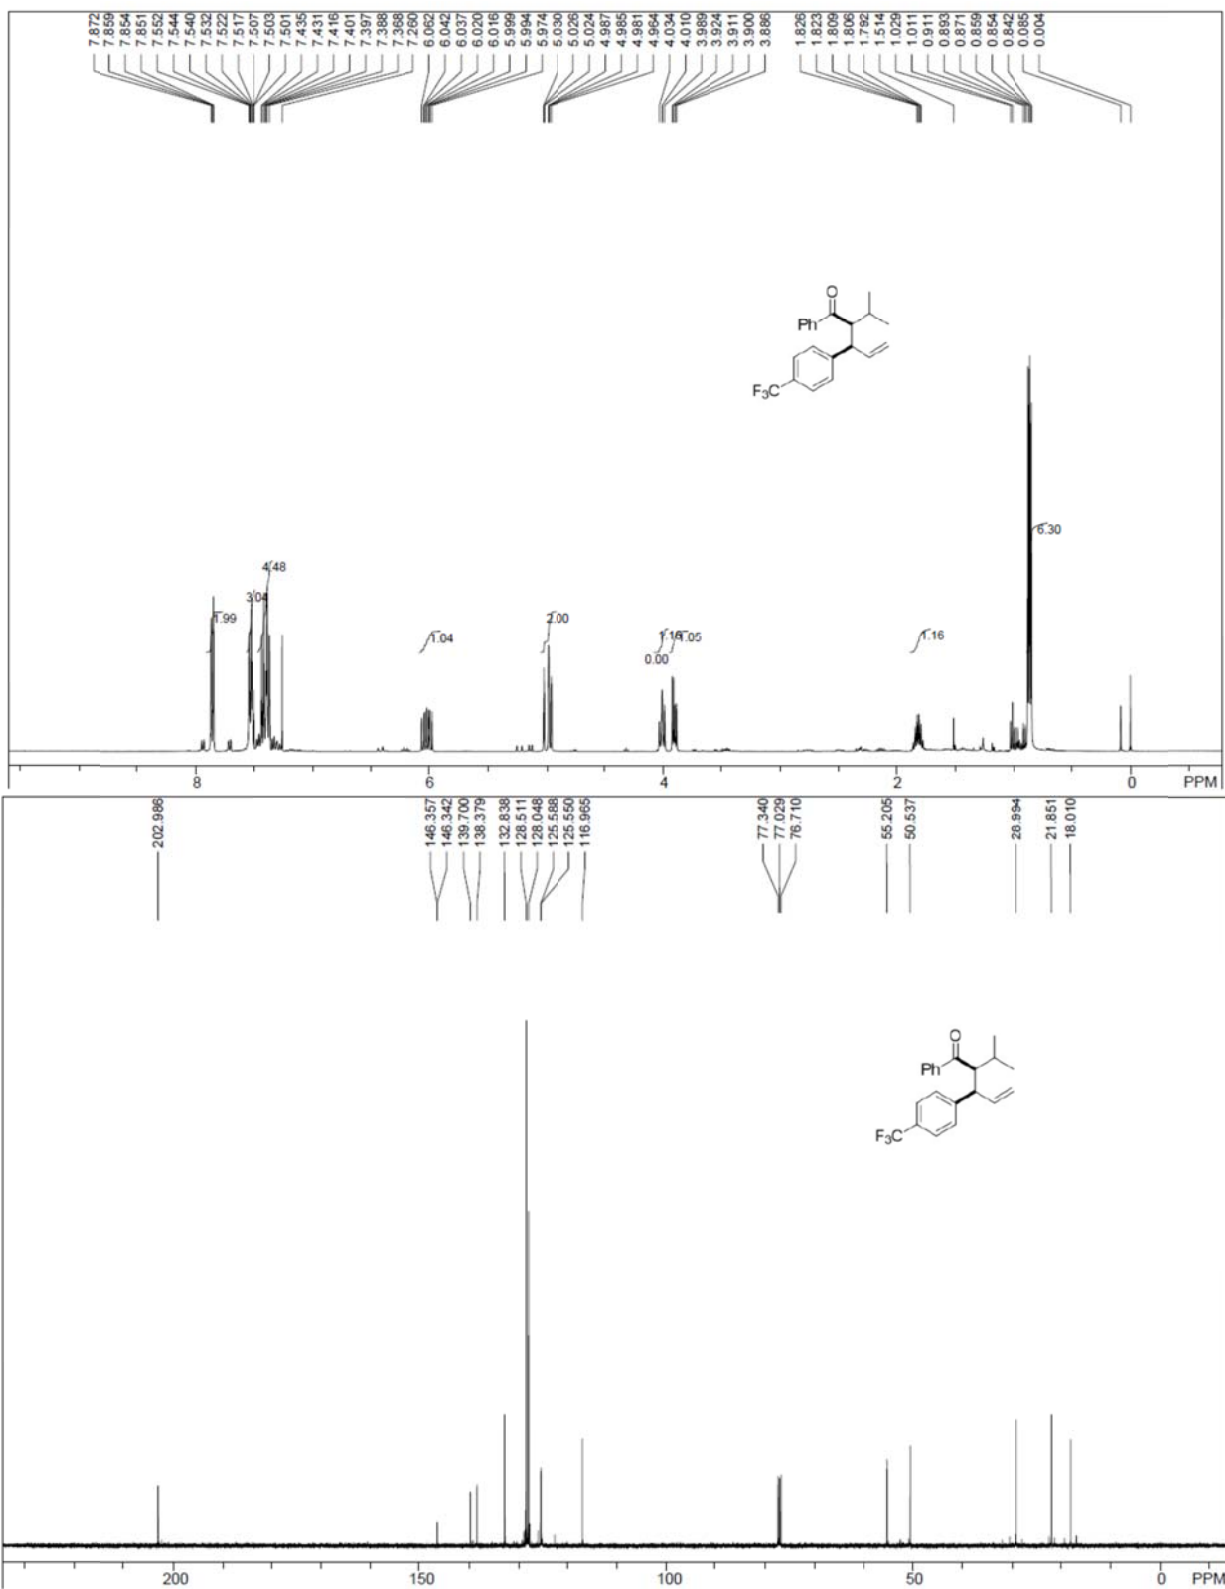

Supplementary Figure 7.  $^1\text{H}$  and  $^{13}\text{C}$  NMR spectrum for 3cd.

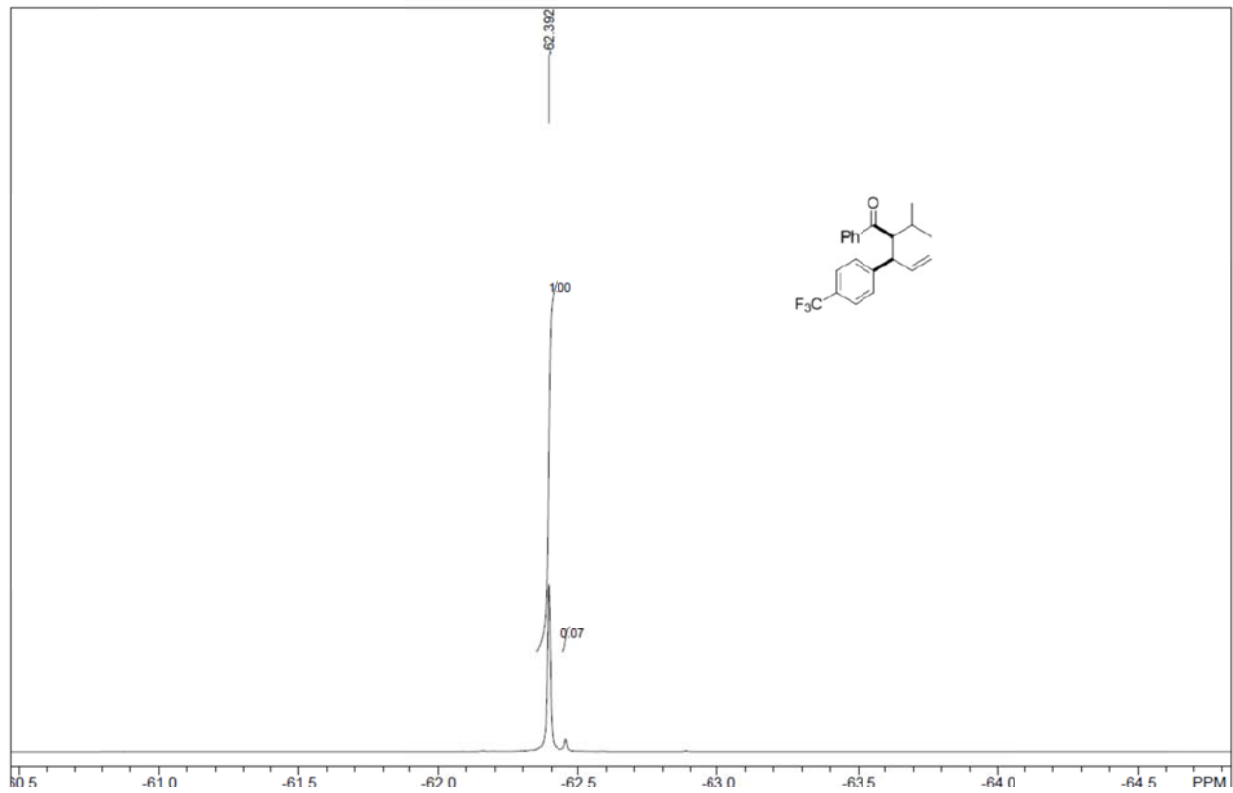

Supplementary Figure 8.  $^{19}\text{F}$  NMR spectrum for 3cd.



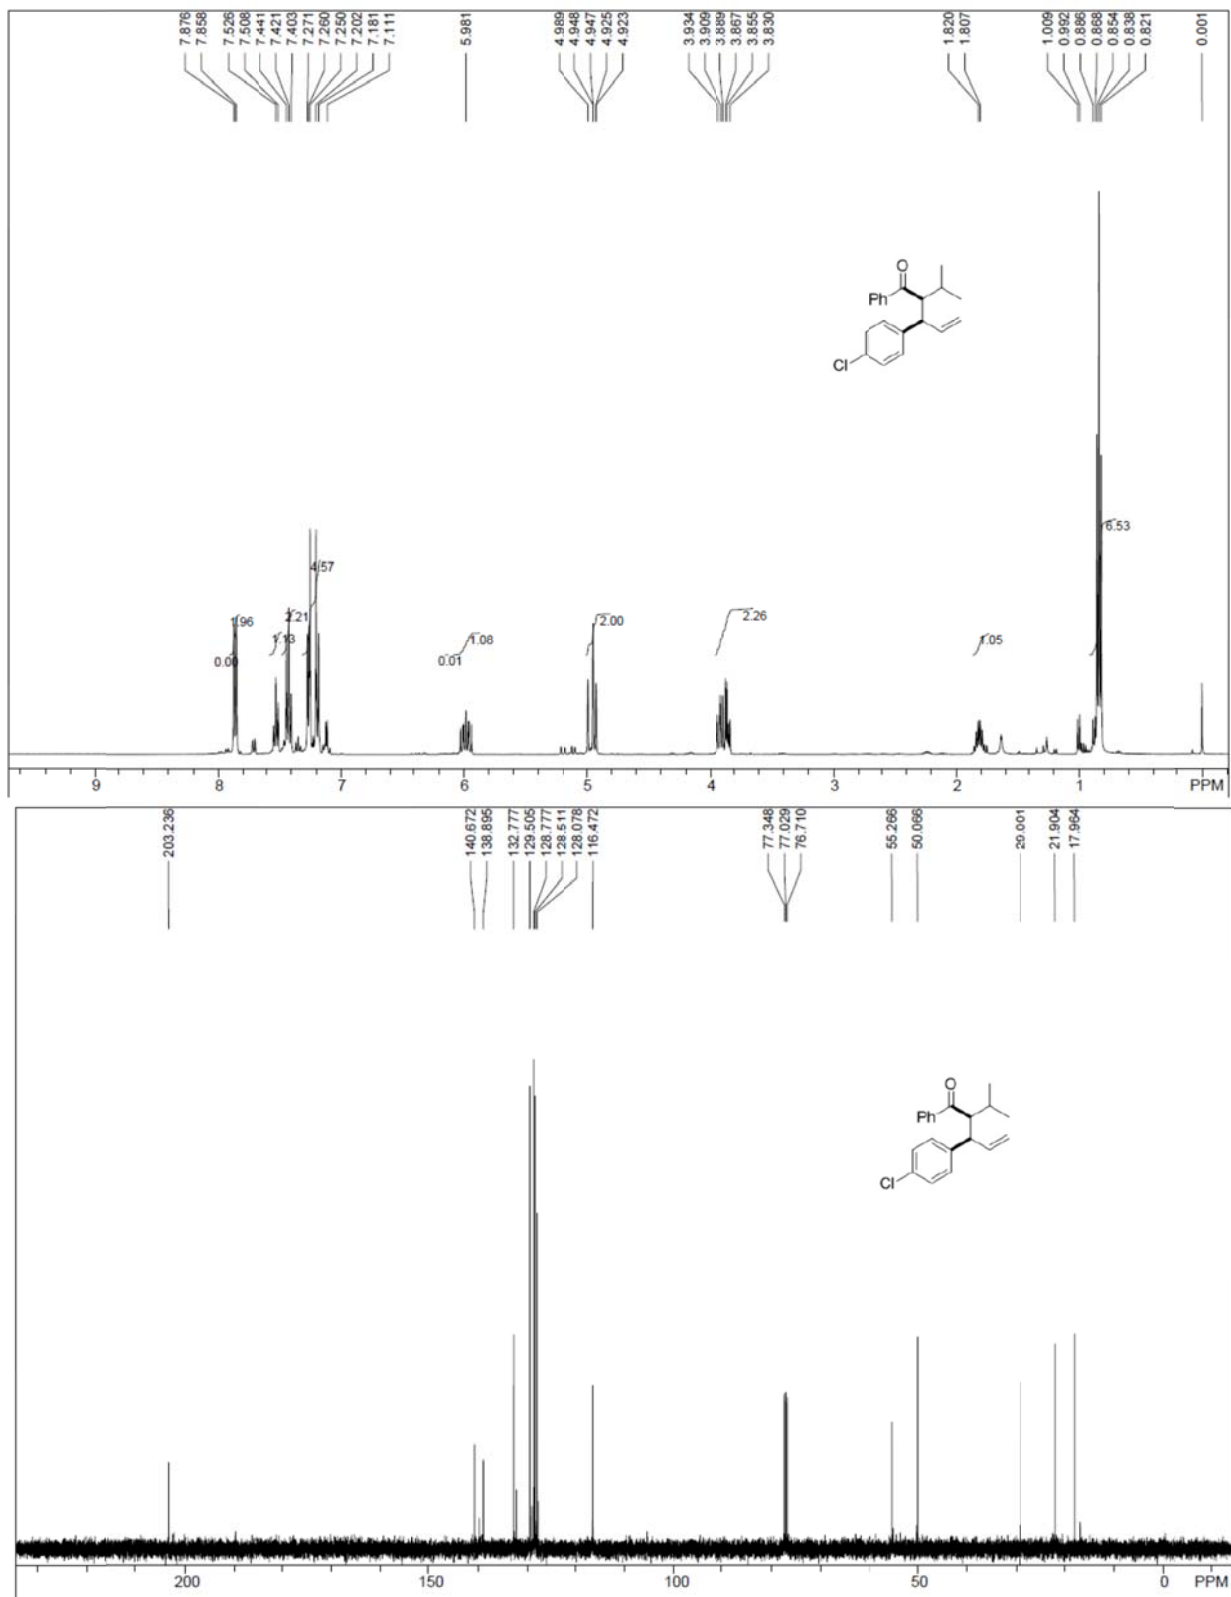

Supplementary Figure 9.  $^1\text{H}$  and  $^{13}\text{C}$  NMR spectrum for 3ce.

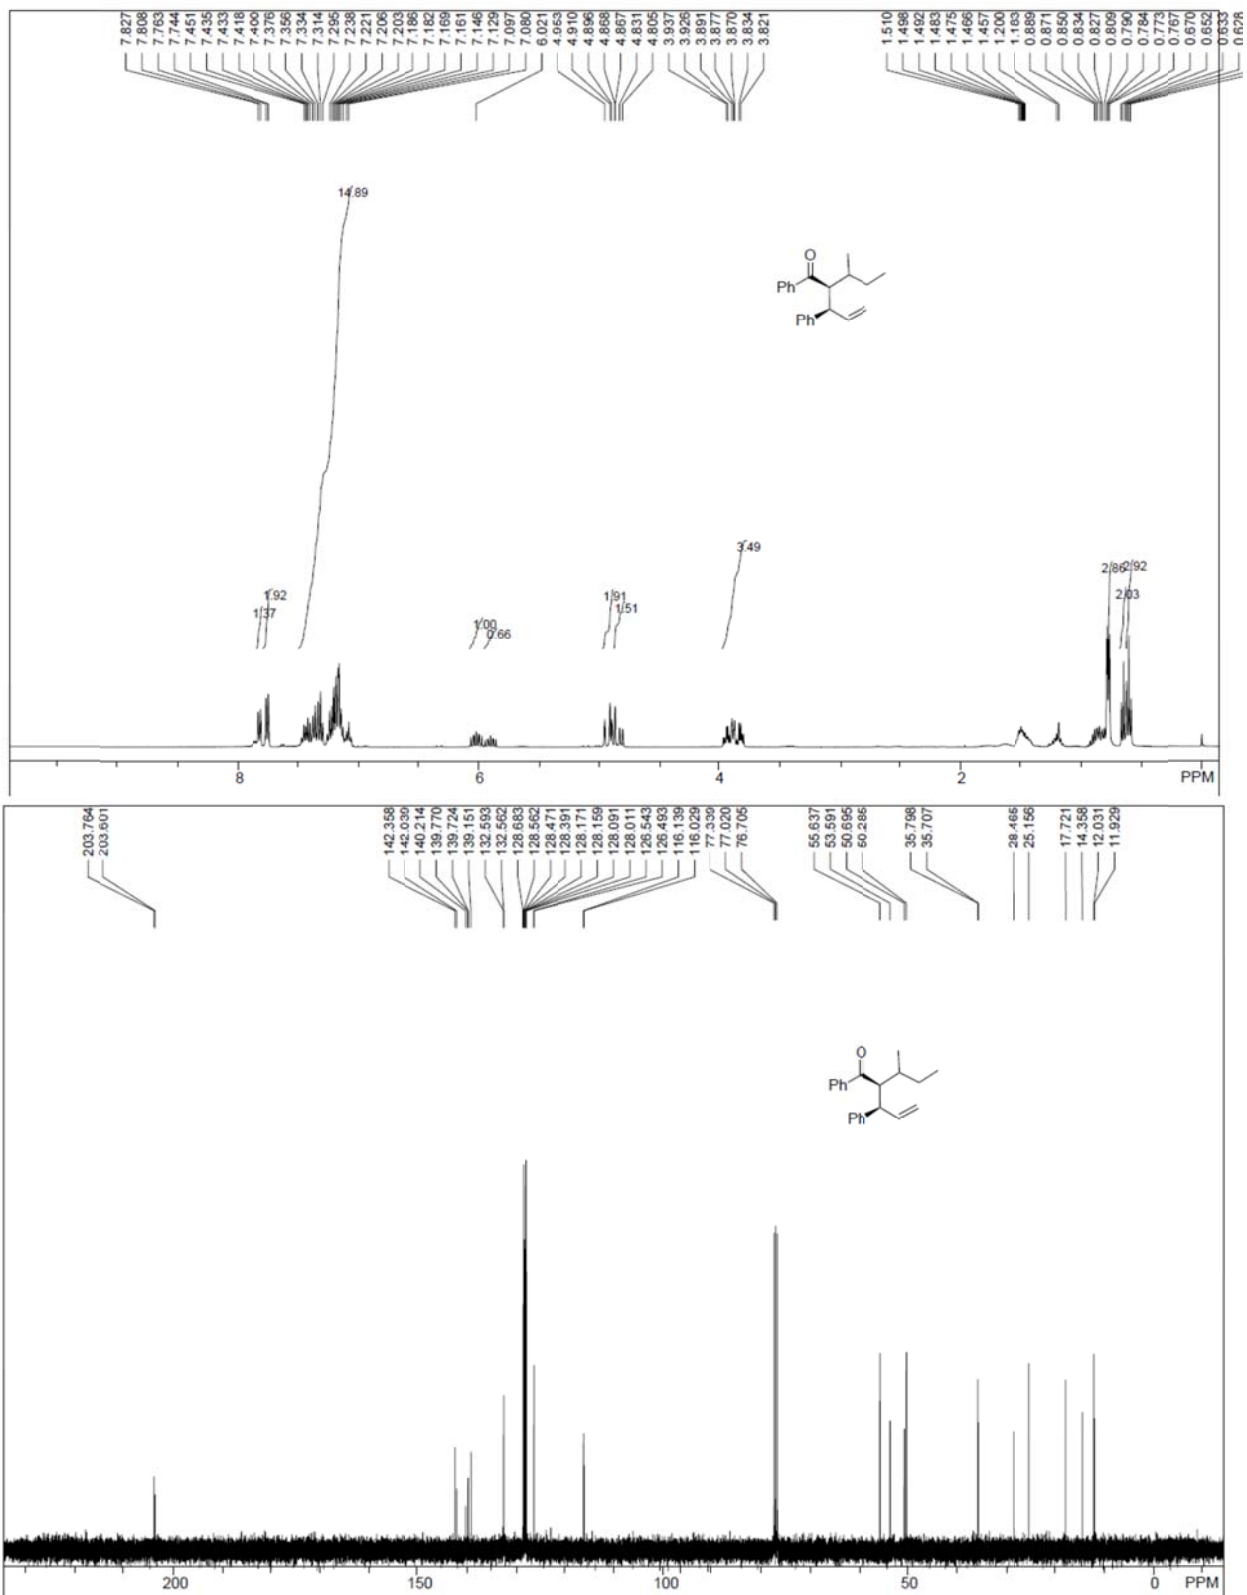

Supplementary Figure 10.  $^1\text{H}$  and  $^{13}\text{C}$  NMR spectrum for 3e.

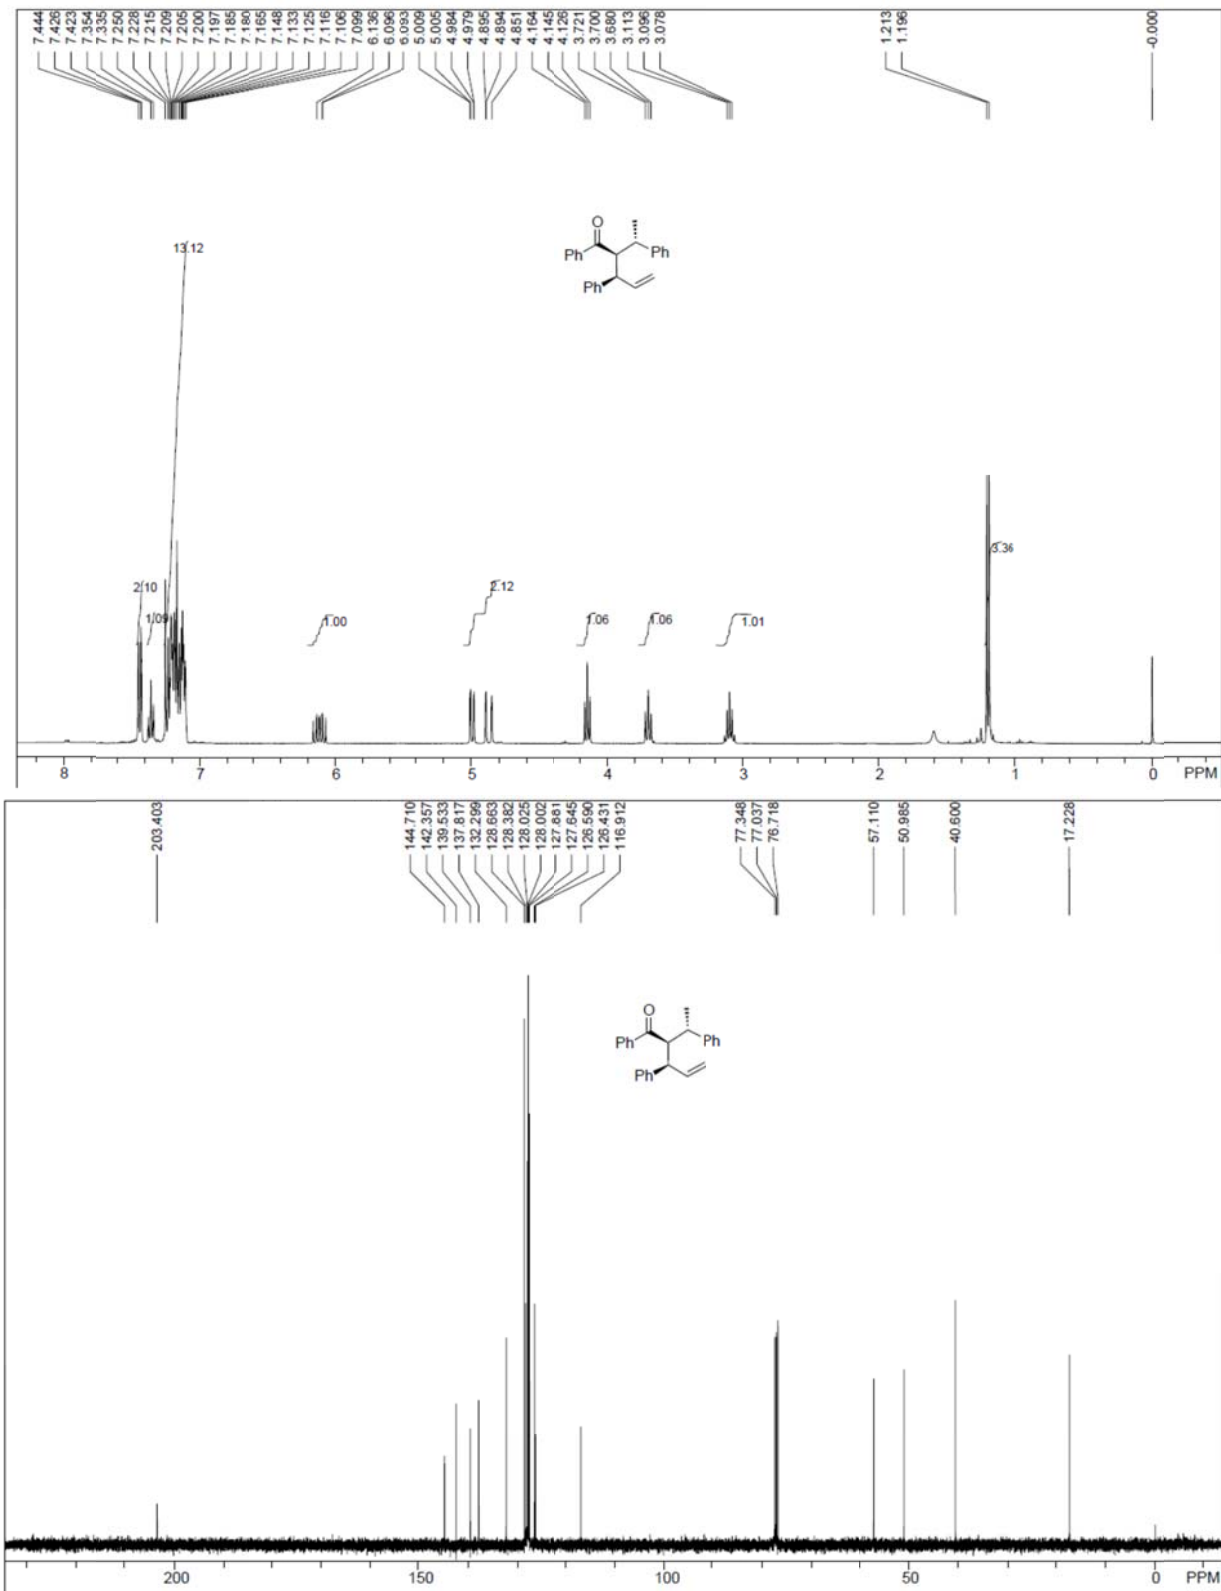

Supplementary Figure 11.  $^1\text{H}$  and  $^{13}\text{C}$  NMR spectrum for 3f

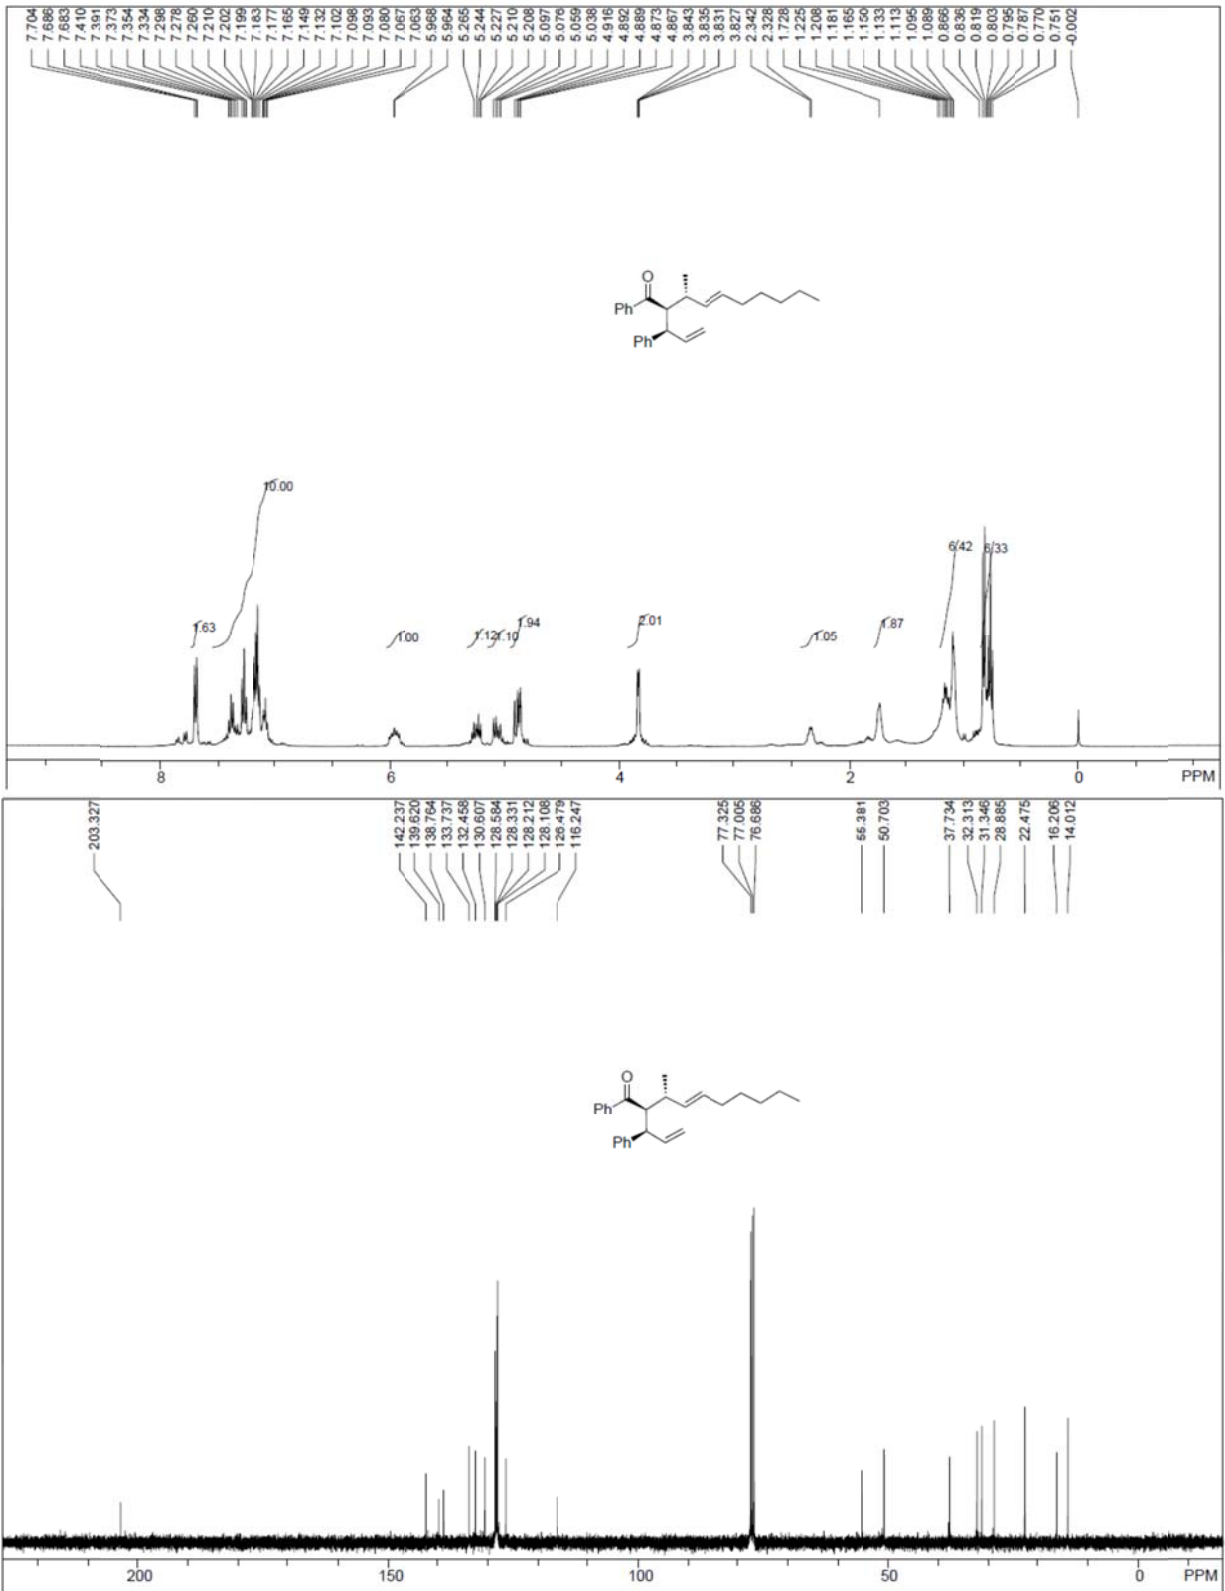

Supplementary Figure 12. <sup>1</sup>H and <sup>13</sup>C NMR spectrum for 3g.

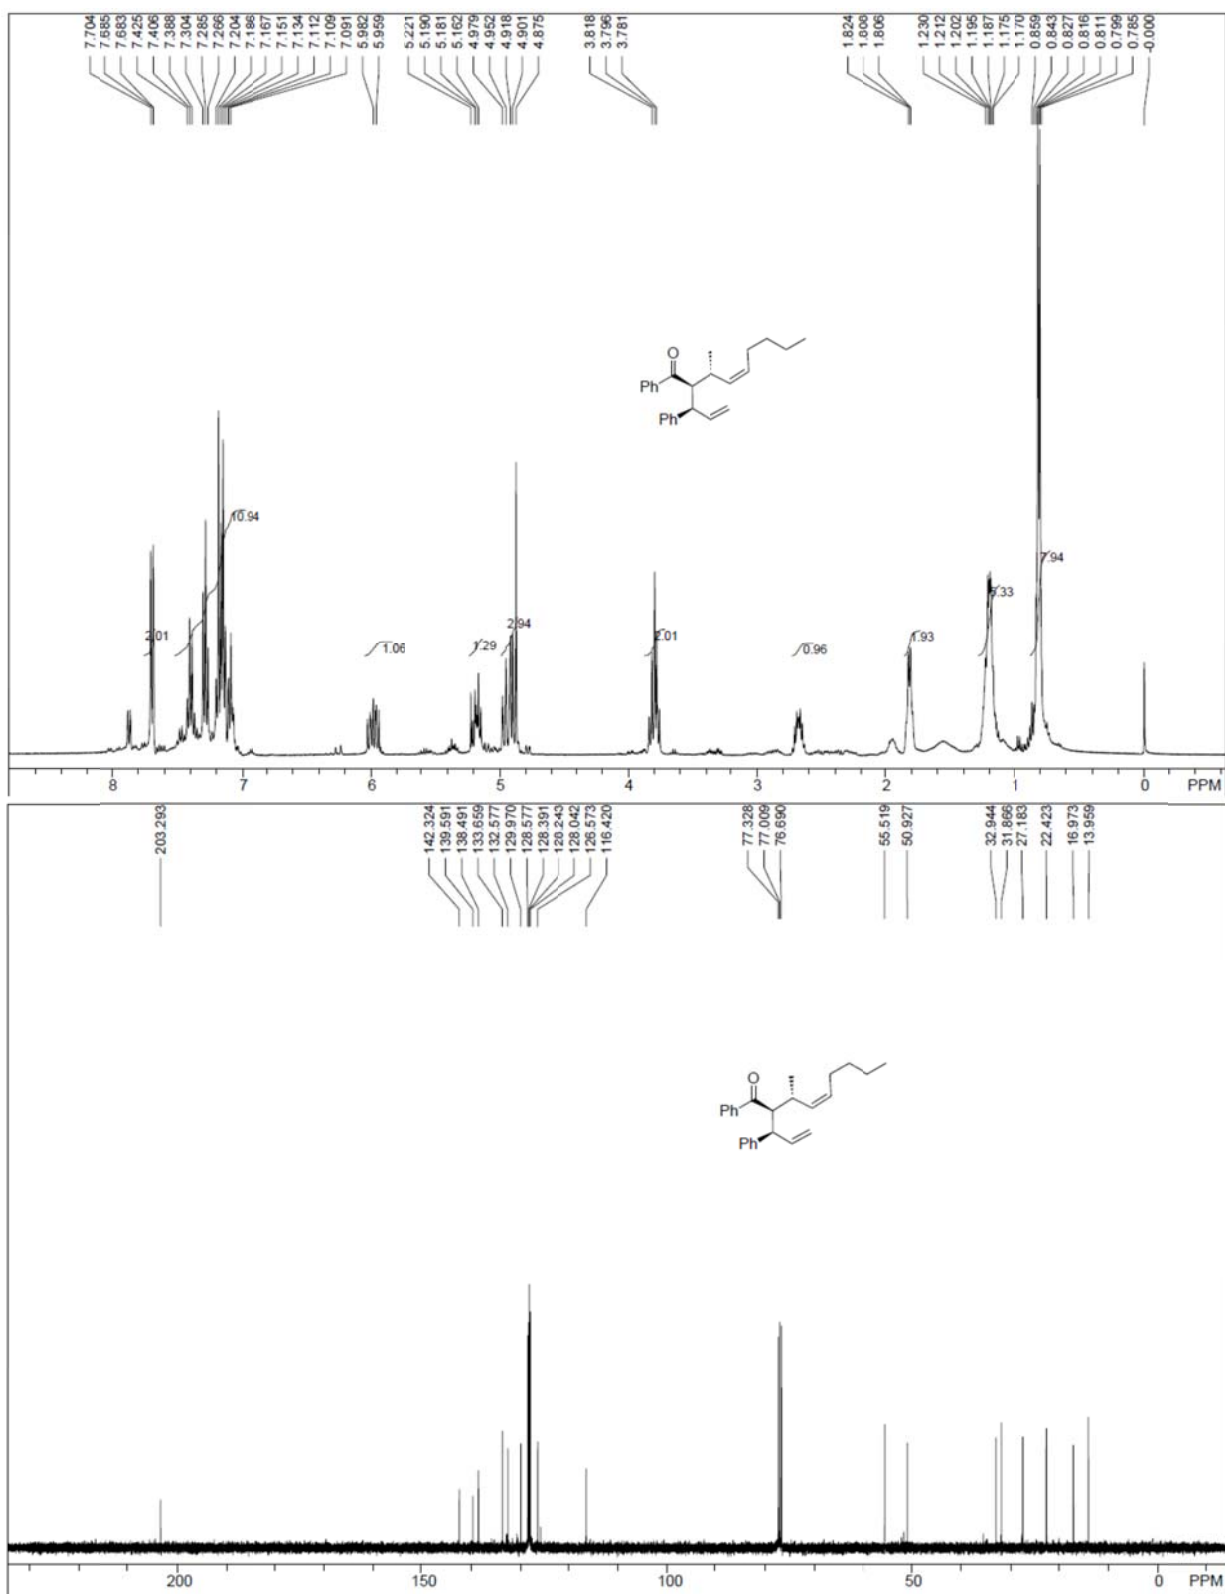

Supplementary Figure 13.  $^1\text{H}$  and  $^{13}\text{C}$  NMR spectrum for 3h.

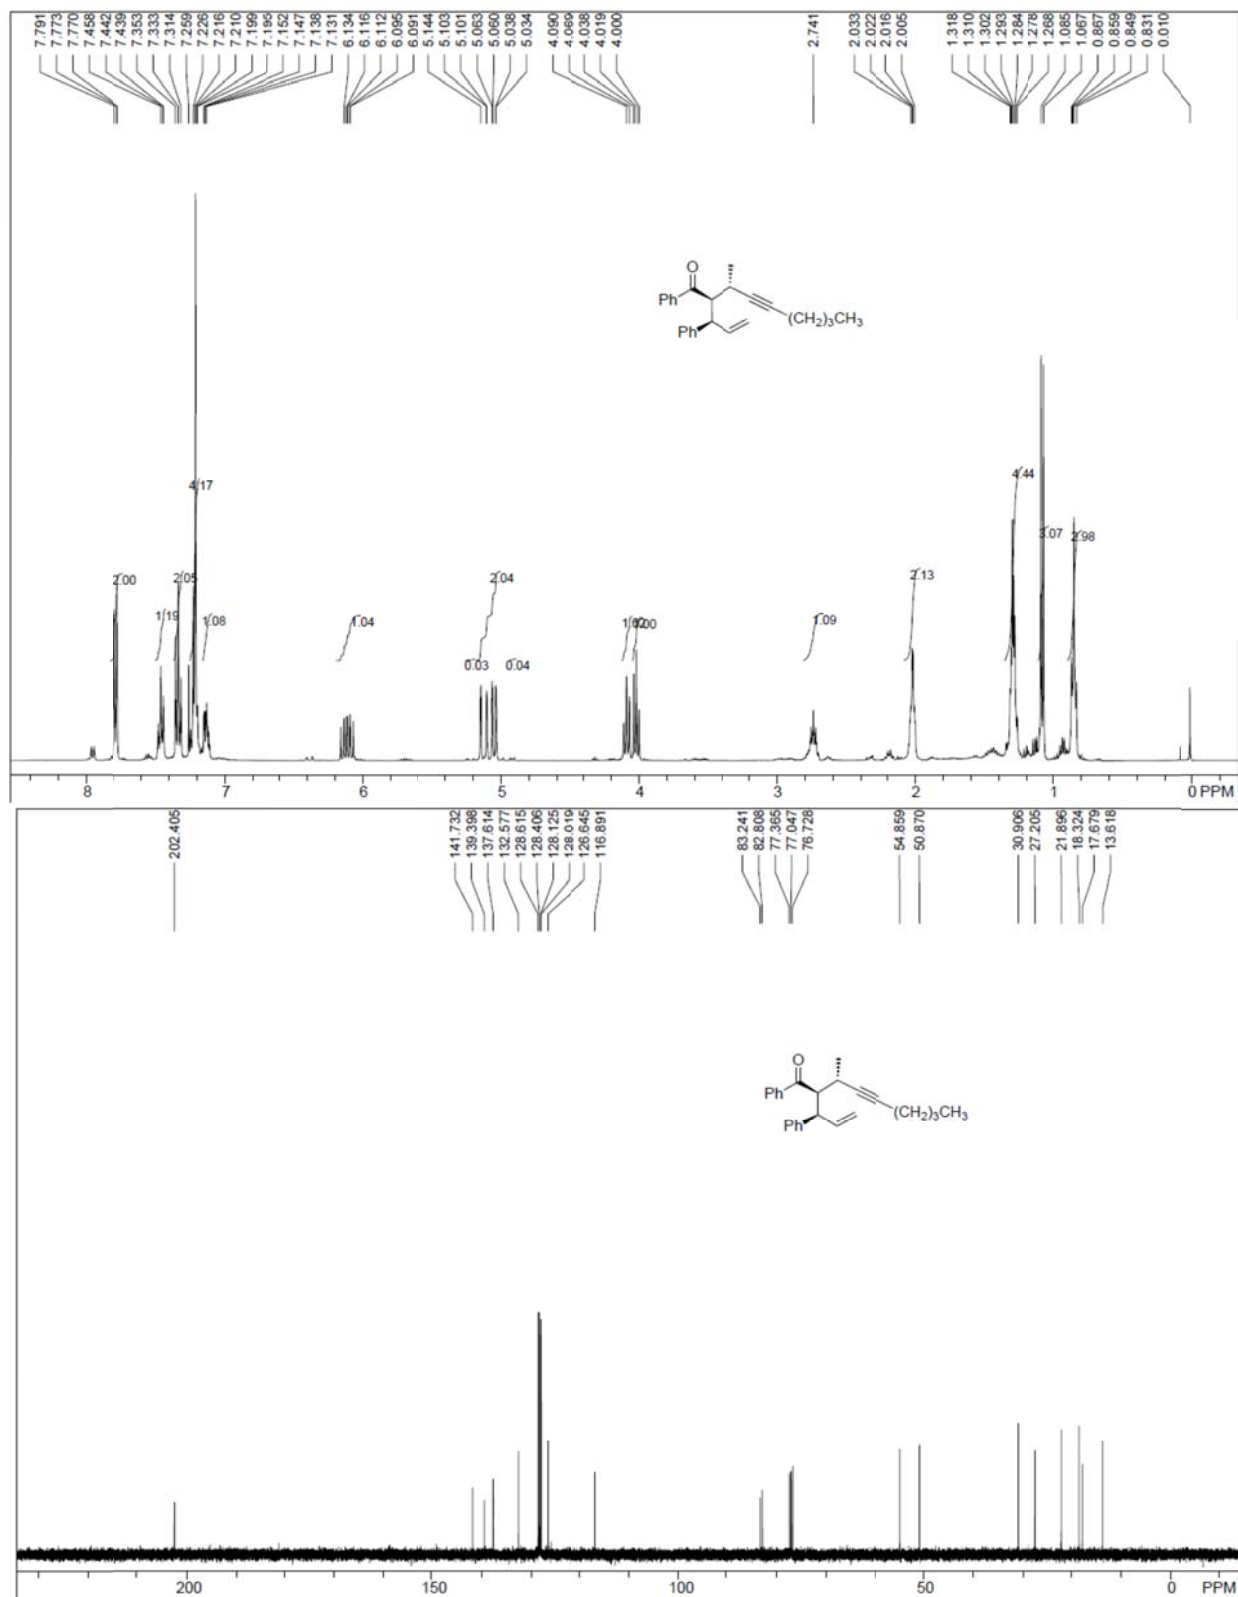

Supplementary Figure 14.  $^1\text{H}$  and  $^{13}\text{C}$  NMR spectrum for 3i.

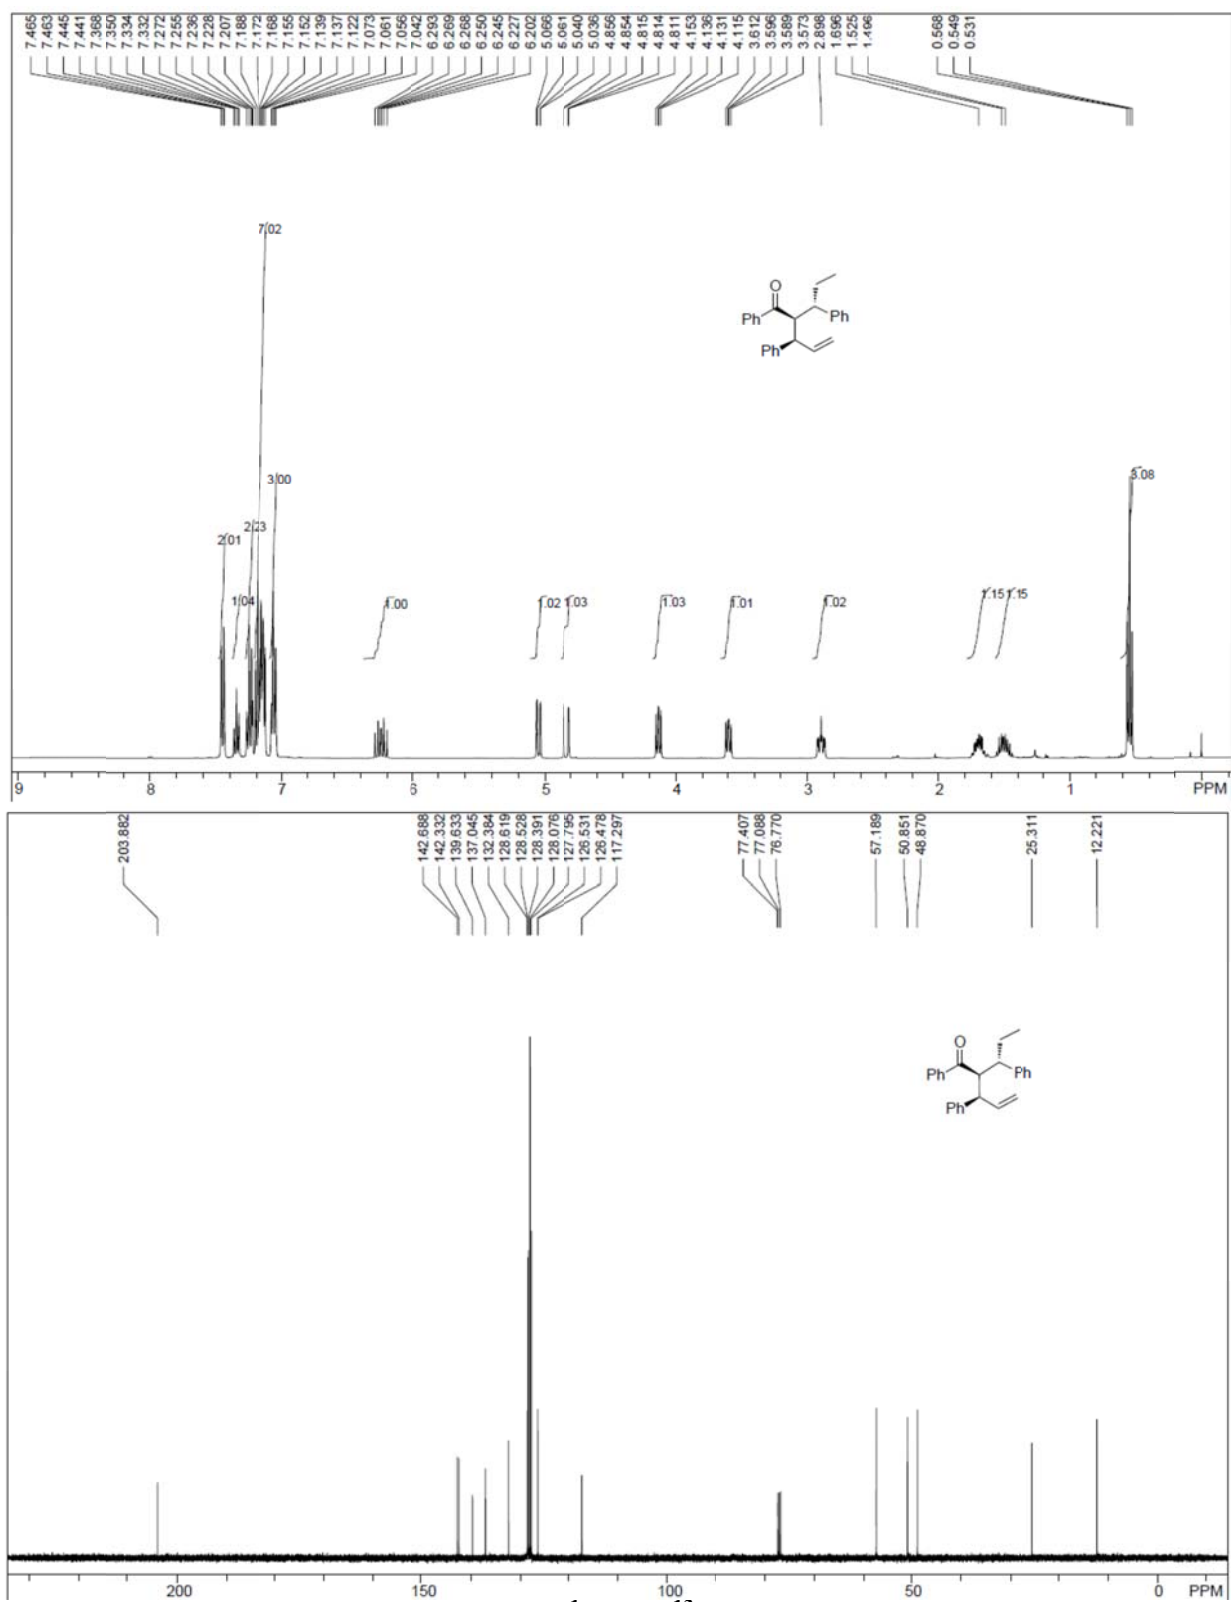

Supplementary Figure 15.  $^1\text{H}$  and  $^{13}\text{C}$  NMR spectrum for **3j**.

```

=====
Acq. Operator   : █████
Sample Operator : █████
Acq. Instrument : SFC                               Location : Vial 12
Injection Date  : 1/15/2015 3:09:26 PM
                                                    Inj Volume : 5.000 µl
Acq. Method    : C:\CHEM32\1\METHODS\AGILENT_SFC6.M
Last changed   : 1/15/2015 2:03:31 PM by █████
                (modified after loading)
Analysis Method : C:\CHEM32\1\METHODS\AGILENT_SFC6.M
Last changed   : 1/16/2015 9:17:39 AM by █████
                (modified after loading)
Additional Info : Peak(s) manually integrated
  
```

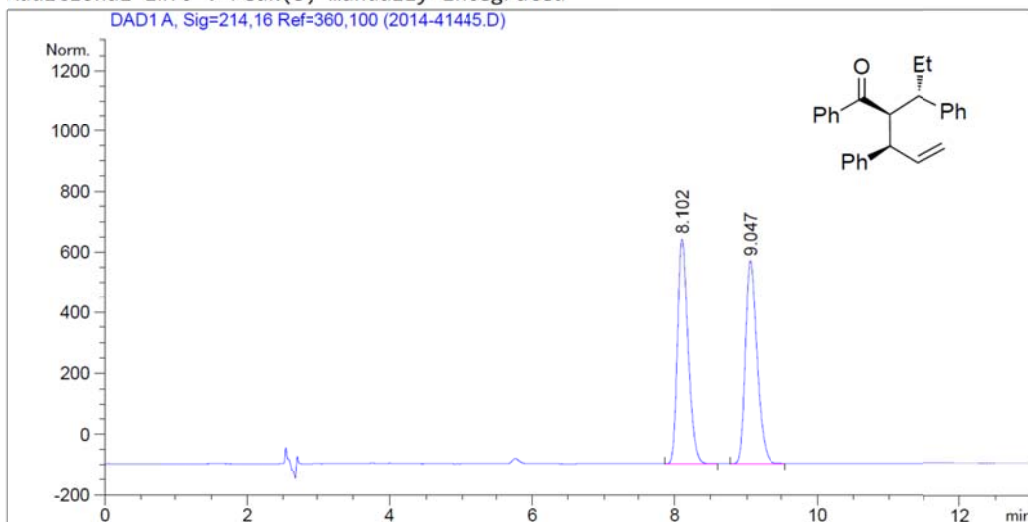

```

=====
                          Area Percent Report
=====
  
```

```

Sorted By      :      Signal
Multiplier     :      1.0000
Dilution       :      1.0000
Do not use Multiplier & Dilution Factor with ISTDs
  
```

Signal 1: DAD1 A, Sig=214,16 Ref=360,100

| Peak # | RetTime [min] | Type | Width [min] | Area [mAU*s] | Height [mAU] | Area %  |
|--------|---------------|------|-------------|--------------|--------------|---------|
| 1      | 8.102         | BB   | 0.1530      | 5398.75391   | 533.79285    | 49.9239 |
| 2      | 9.047         | BB   | 0.1726      | 5415.20703   | 480.24991    | 50.0761 |

```
Totals :                      1.08140e4  1014.04276
```

**Supplementary Figure 16. HPLC spectrum for (rac)-3j.**



```

=====
Acq. Operator   : █████
Sample Operator : █████
Acq. Instrument : SFC                               Location : Vial 14
Injection Date  : 1/15/2015 2:48:31 PM
                                                    Inj Volume : 5.000 µl
Acq. Method     : C:\CHEM32\1\METHODS\AGILENT_SFC6.M
Last changed    : 1/15/2015 2:03:31 PM by █████
                  (modified after loading)
Analysis Method : C:\CHEM32\1\METHODS\AGILENT_SFC6.M
Last changed    : 1/16/2015 9:16:28 AM by █████
                  (modified after loading)
Additional Info  : Peak(s) manually integrated
  
```

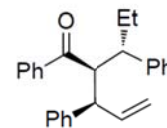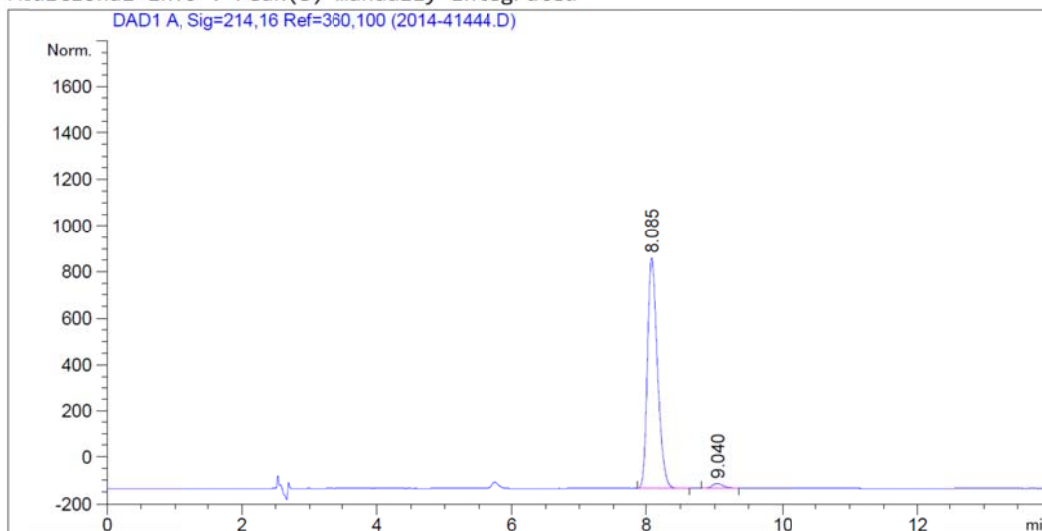

```

=====
                          Area Percent Report
=====
  
```

```

Sorted By      :      Signal
Multiplier     :      1.0000
Dilution       :      1.0000
Do not use Multiplier & Dilution Factor with ISTDs
  
```

Signal 1: DAD1 A, Sig=214,16 Ref=360,100

| Peak # | RetTime [min] | Type | Width [min] | Area [mAU*s] | Height [mAU] | Area %  |
|--------|---------------|------|-------------|--------------|--------------|---------|
| 1      | 8.085         | BB   | 0.1550      | 7258.21777   | 711.75519    | 97.9040 |
| 2      | 9.040         | BB   | 0.1686      | 155.38846    | 14.21236     | 2.0960  |

Totals :                                7413.60623    725.96755

**Supplementary Figure 17. HPLC spectrum for (3R, 4S, 5S)-3j.**

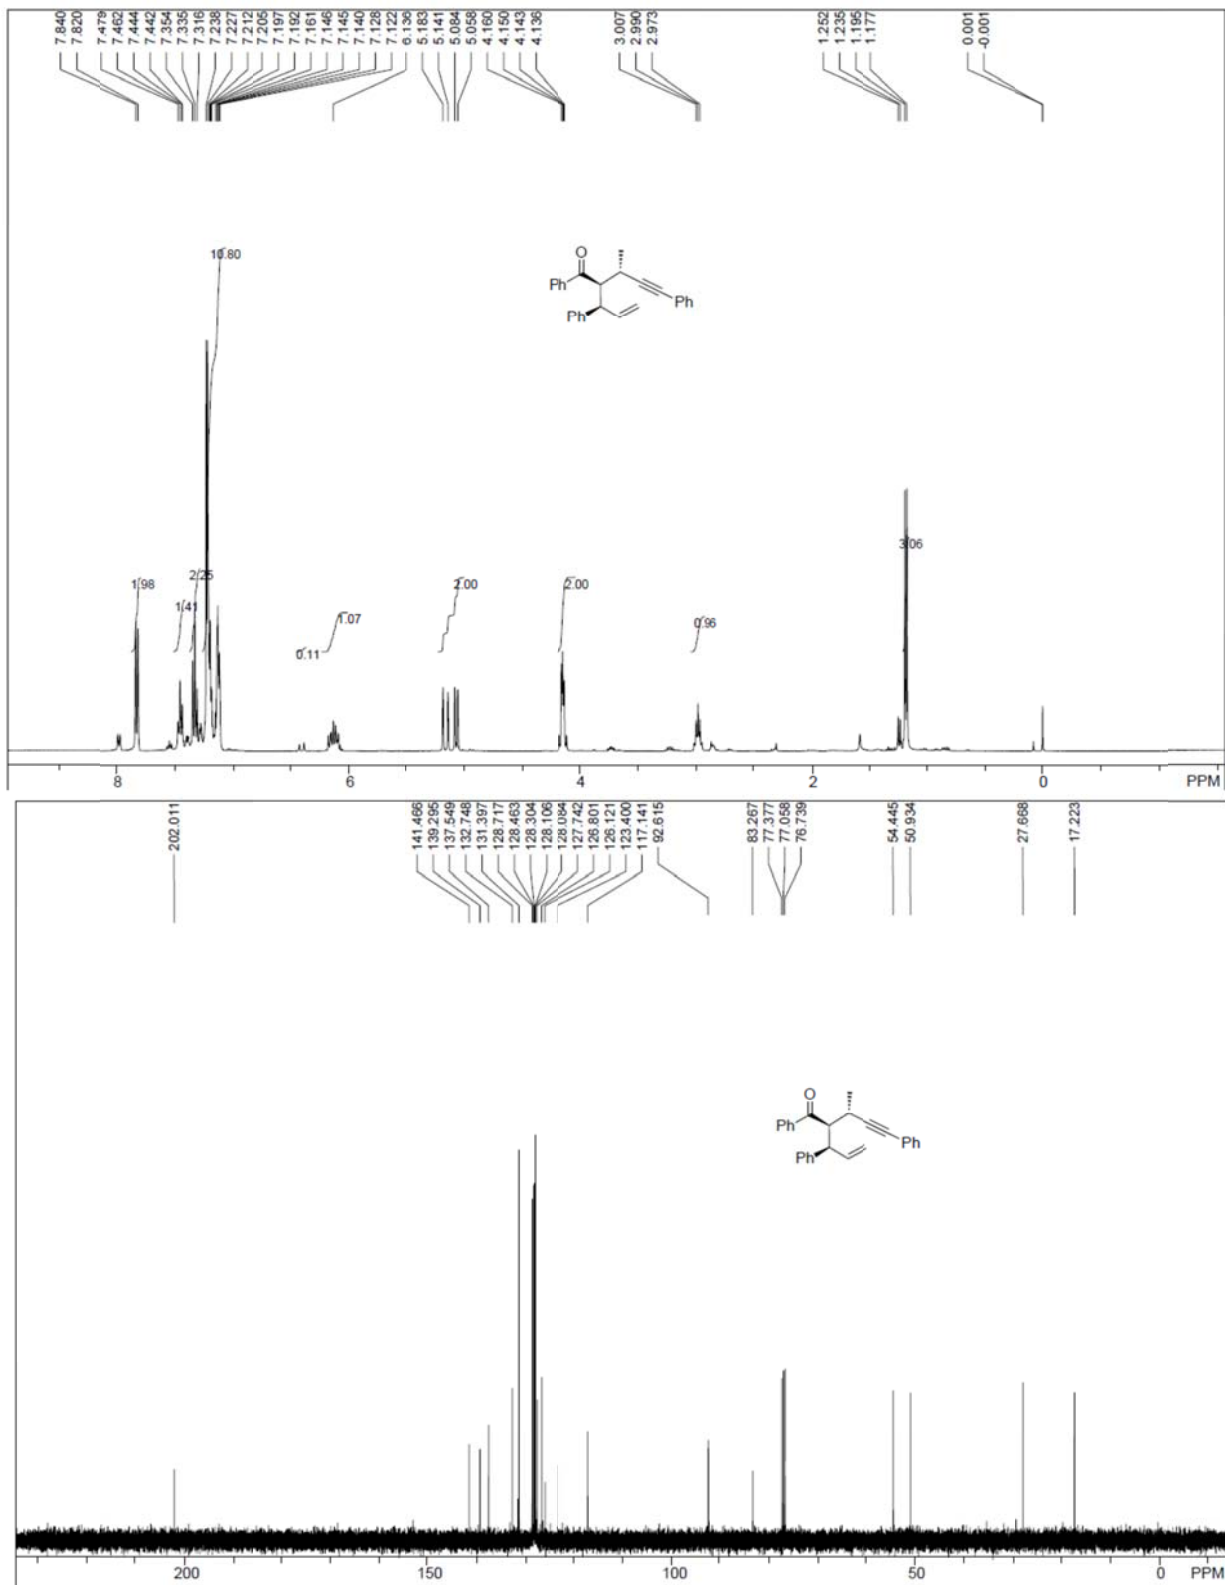

Supplementary Figure 18. <sup>1</sup>H and <sup>13</sup>C NMR spectrum for 3k.

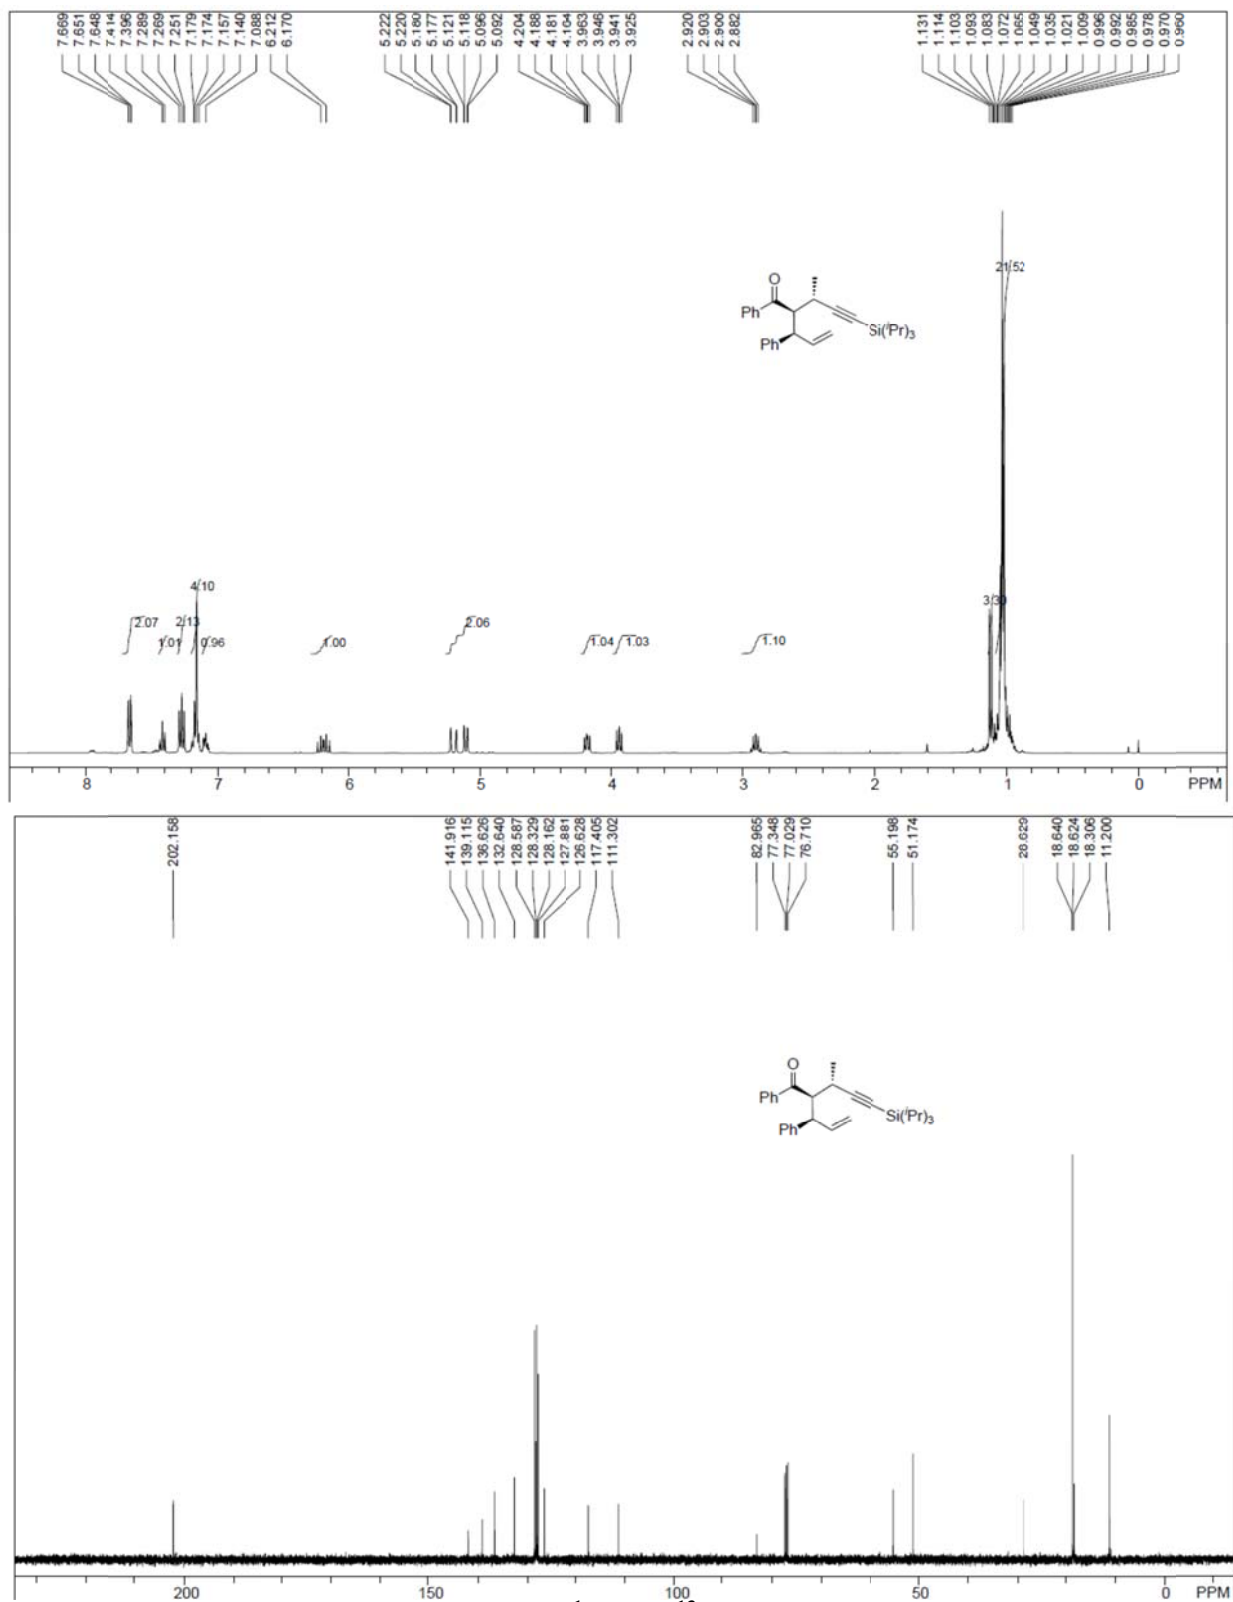

Supplementary Figure 19. <sup>1</sup>H and <sup>13</sup>C NMR spectrum for 3l.

```

=====
Acq. Operator   : █████
Sample Operator : █████
Acq. Instrument : SFC                               Location : Vial 12
Injection Date  : 1/23/2015 9:50:50 AM             Inj Volume : 5.000 µl
Acq. Method    : C:\CHEM32\1\METHODS\AGILENT_SFC6.M
Last changed   : 1/23/2015 9:27:42 AM by █████
                (modified after loading)
Analysis Method : C:\CHEM32\1\METHODS\AGILENT_SFC6.M
Last changed   : 1/23/2015 3:36:50 PM by █████
                (modified after loading)
Additional Info : Peak(s) manually integrated
  
```

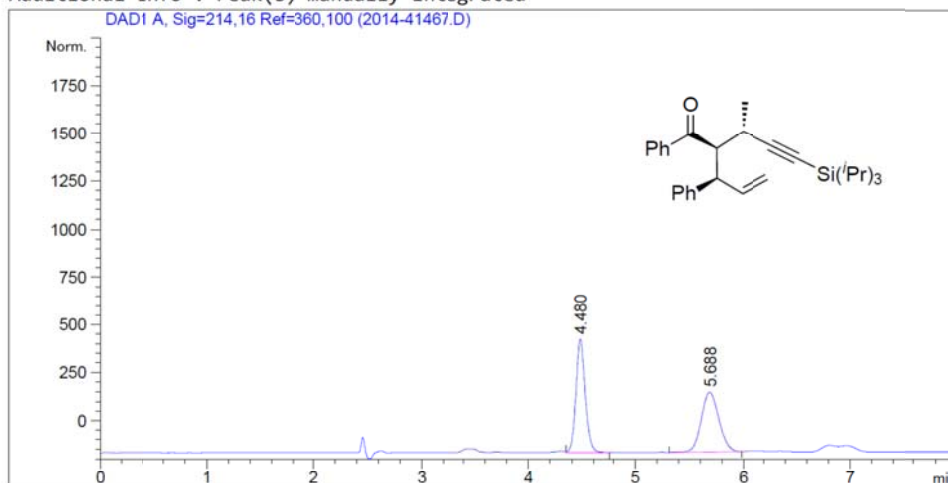

```

=====
                          Area Percent Report
=====
  
```

```

Sorted By      :      Signal
Multiplier     :      1.0000
Dilution       :      1.0000
Do not use Multiplier & Dilution Factor with ISTDs
  
```

Signal 1: DAD1 A, Sig=214,16 Ref=360,100

| Peak # | RetTime [min] | Type | Width [min] | Area [mAU*s] | Height [mAU] | Area %  |
|--------|---------------|------|-------------|--------------|--------------|---------|
| 1      | 4.480         | VB   | 0.0891      | 1389.57458   | 234.58810    | 49.8166 |
| 2      | 5.688         | BV   | 0.1756      | 1399.80823   | 124.09475    | 50.1834 |

```
Totals :                2789.38281  358.68285
```

Supplementary Figure 20. HPLC spectrum for (rac)-3l.

```

=====
Acq. Operator   : █████
Sample Operator : █████
Acq. Instrument : SFC                               Location : Vial 17
Injection Date  : 1/23/2015 10:24:55 AM           Inj Volume : 5.000 µl
Acq. Method     : C:\CHEM32\1\METHODS\AGILENT_SFC6.M
Last changed    : 1/23/2015 9:27:42 AM by █████
                  (modified after loading)
Analysis Method : C:\CHEM32\1\METHODS\AGILENT_SFC6.M
Last changed    : 1/23/2015 3:42:54 PM by █████
                  (modified after loading)
Additional Info : Peak(s) manually integrated
  
```

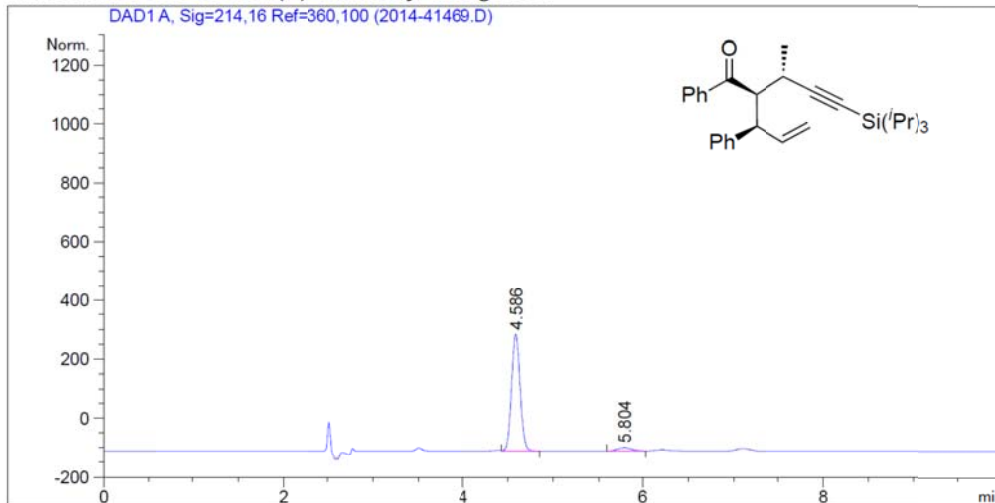

```

=====
                          Area Percent Report
=====
  
```

```

Sorted By      :      Signal
Multiplier     :      1.0000
Dilution       :      1.0000
Do not use Multiplier & Dilution Factor with ISTDs
  
```

Signal 1: DAD1 A, Sig=214,16 Ref=360,100

| Peak # | RetTime [min] | Type | Width [min] | Area [mAU*s] | Height [mAU] | Area %  |
|--------|---------------|------|-------------|--------------|--------------|---------|
| 1      | 4.586         | VB   | 0.1024      | 1011.38470   | 154.49608    | 95.3492 |
| 2      | 5.804         | BB   | 0.1614      | 49.33219     | 4.48283      | 4.6508  |

```
Totals :                      1060.71689  158.97891
```

**Supplementary Figure 21. HPLC spectrum for (3R,4S,5S)-31.**

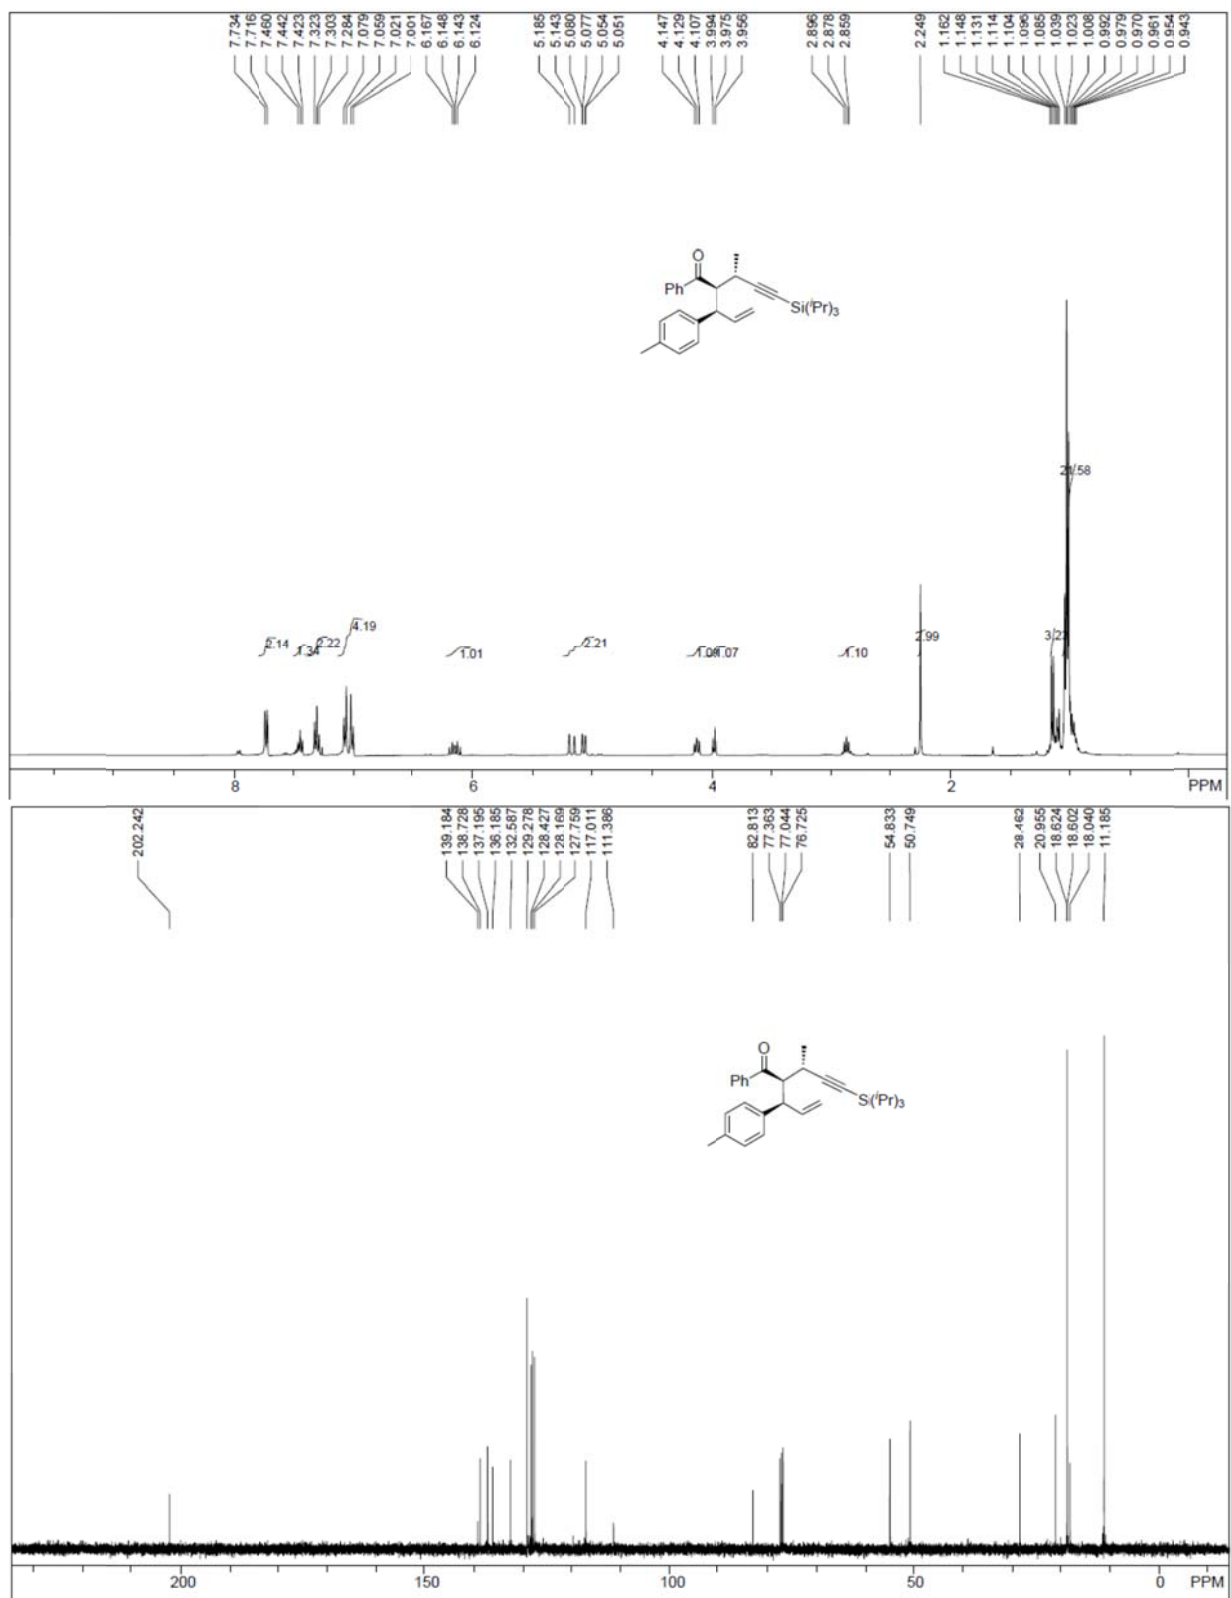

Supplementary Figure 22. <sup>1</sup>H and <sup>13</sup>C NMR spectrum for 3m.

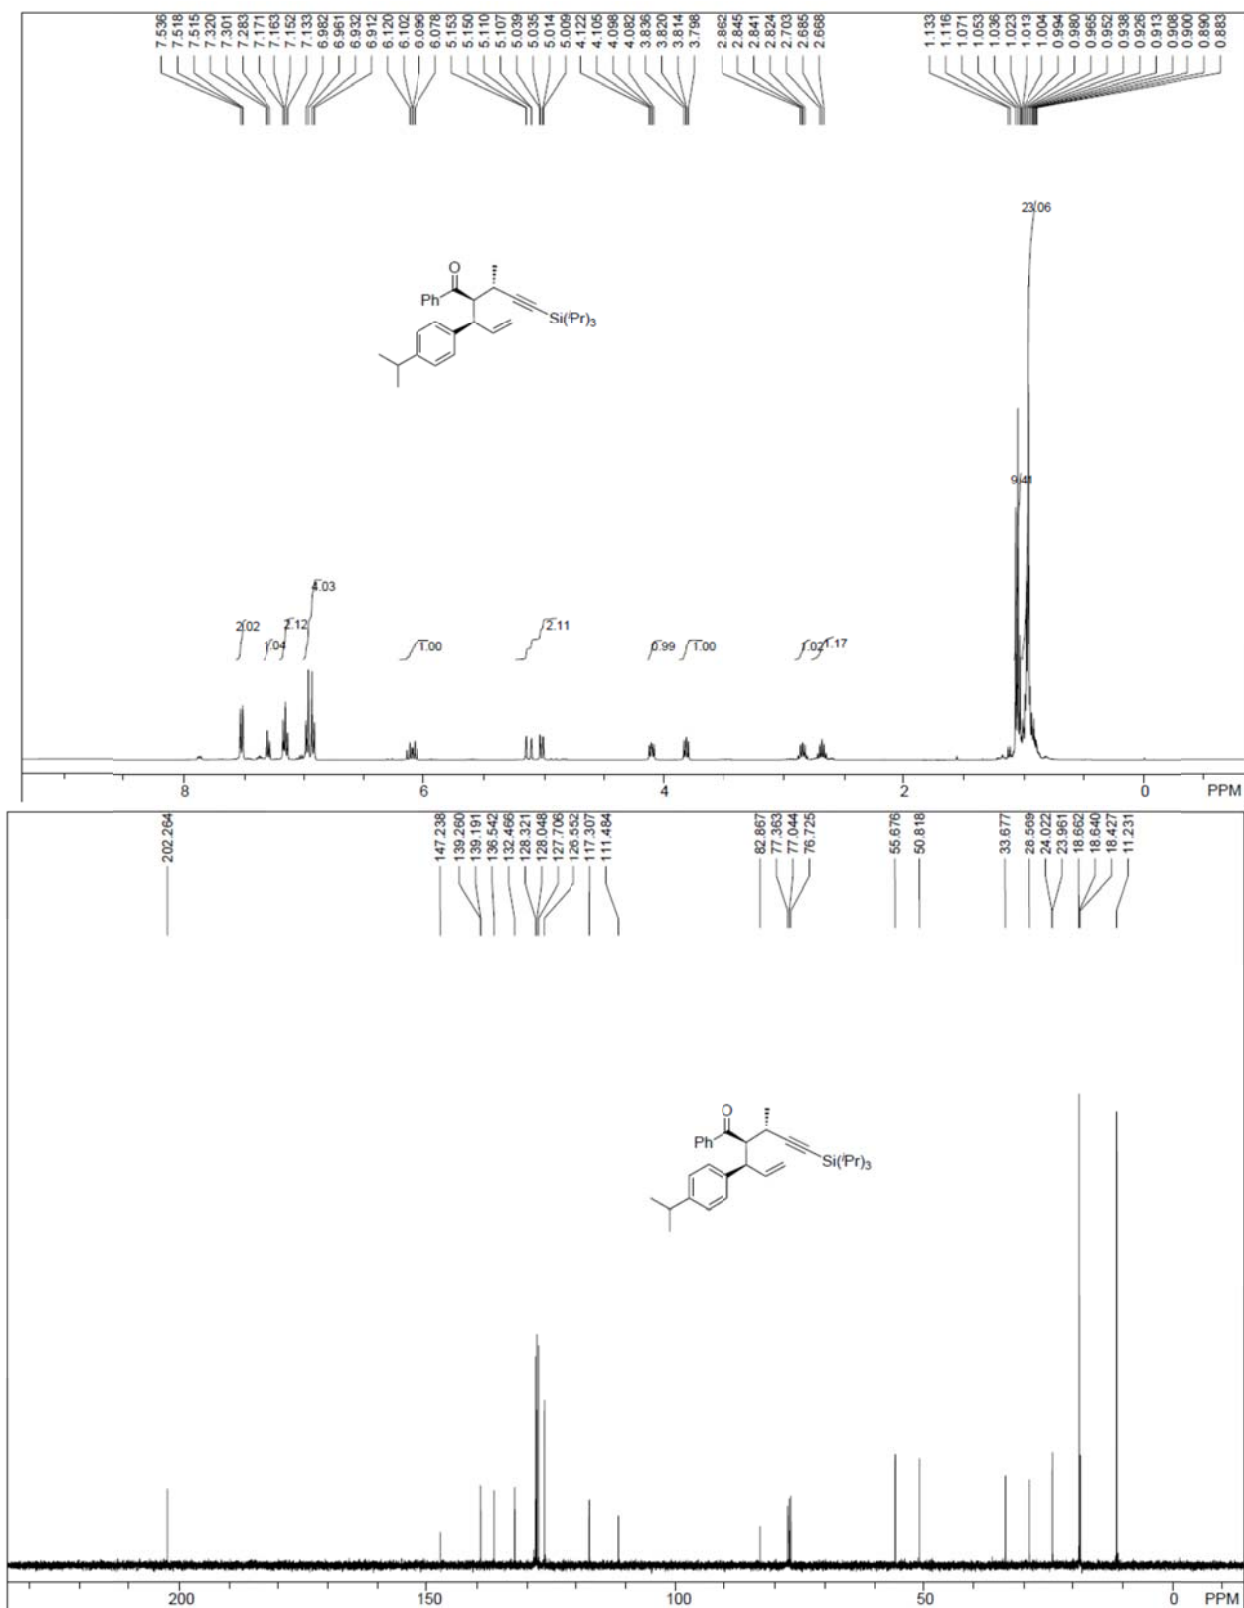

Supplementary Figure 23. <sup>1</sup>H and <sup>13</sup>C NMR spectrum for 3n.

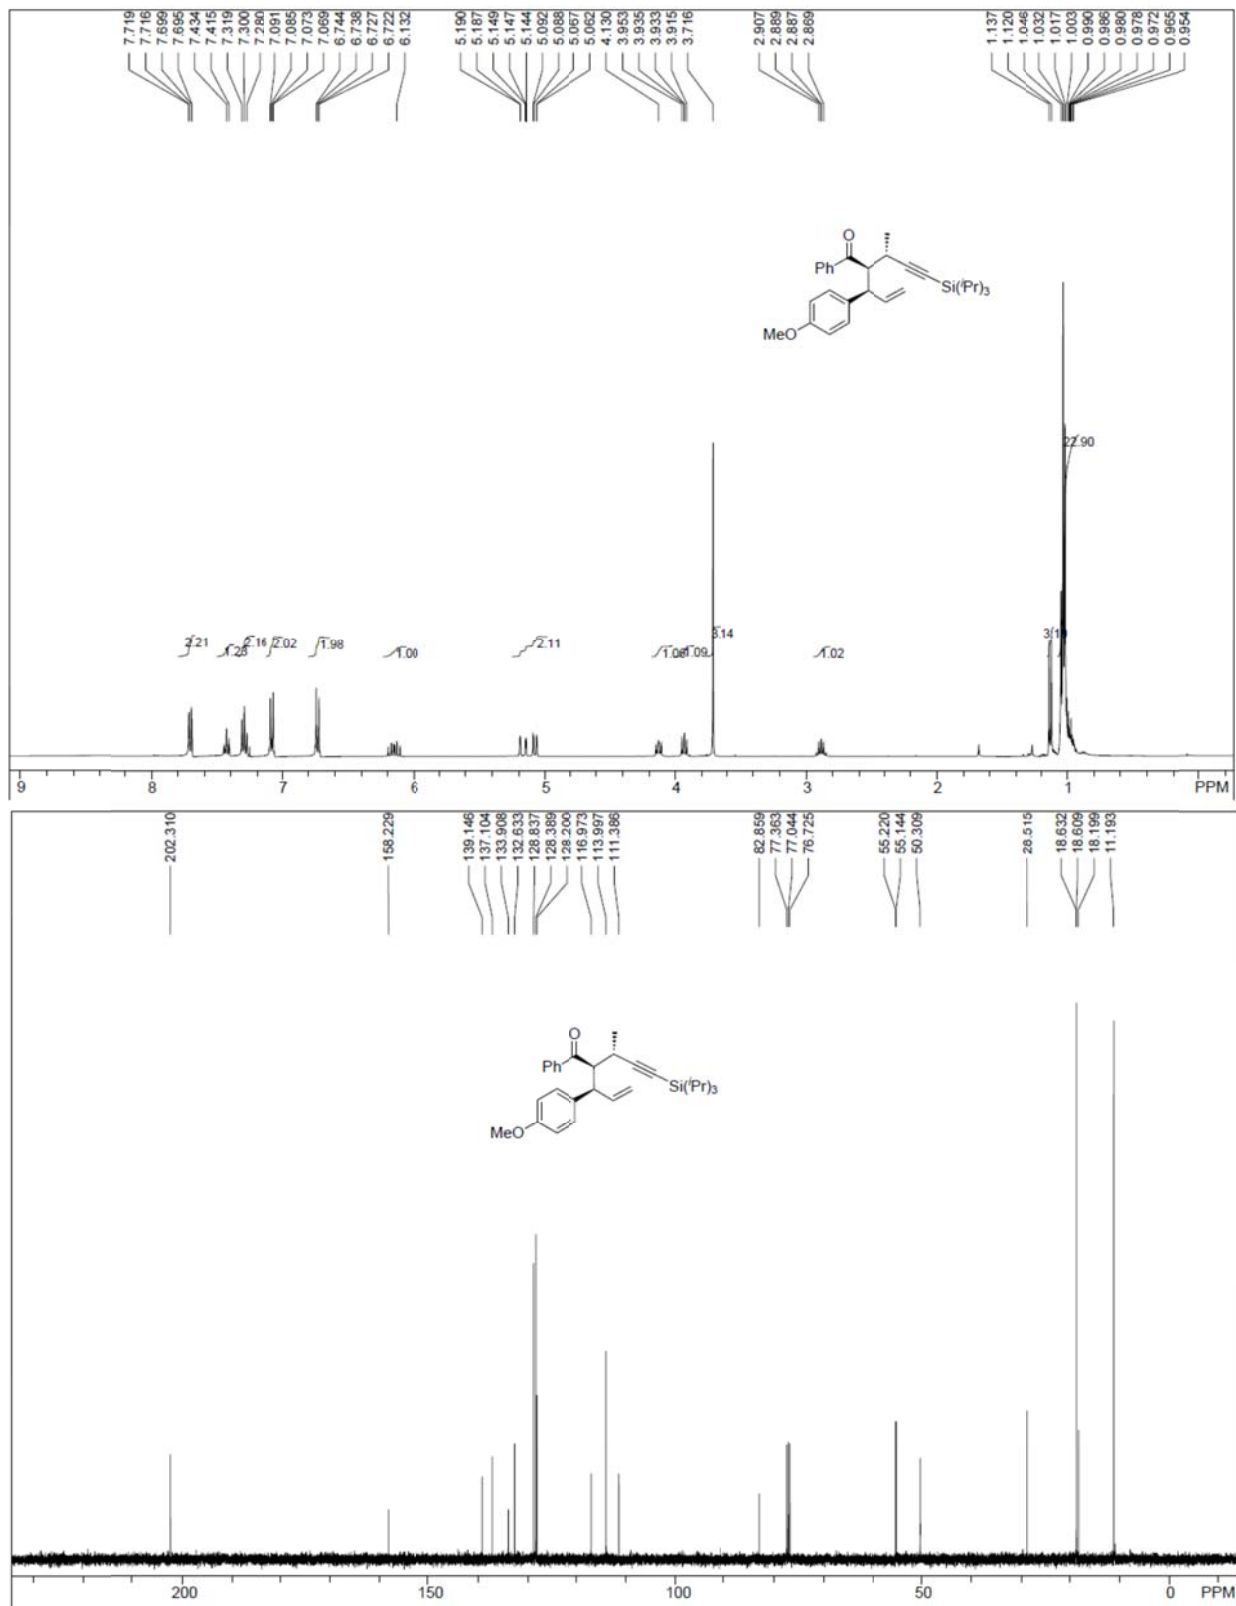

Supplementary Figure 24. <sup>1</sup>H and <sup>13</sup>C NMR spectrum for 30.



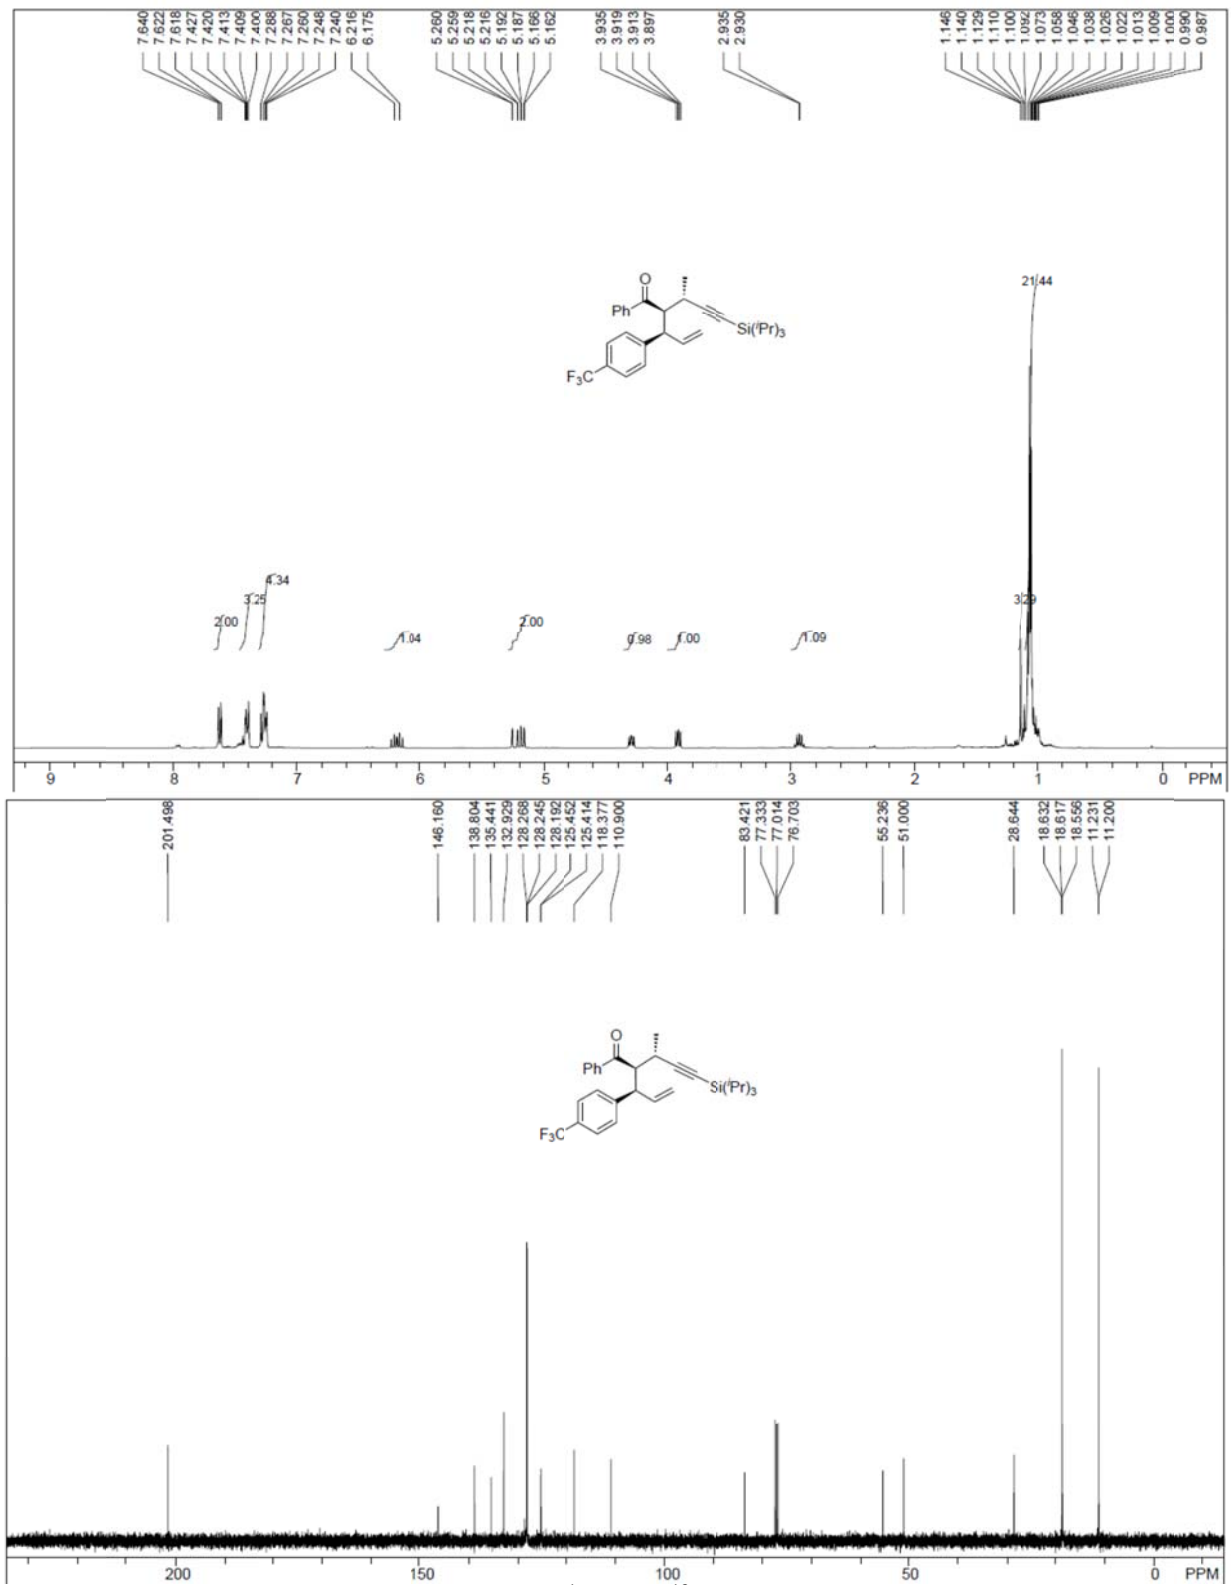

Supplementary Figure 25. <sup>1</sup>H and <sup>13</sup>C NMR spectrum for 3p.

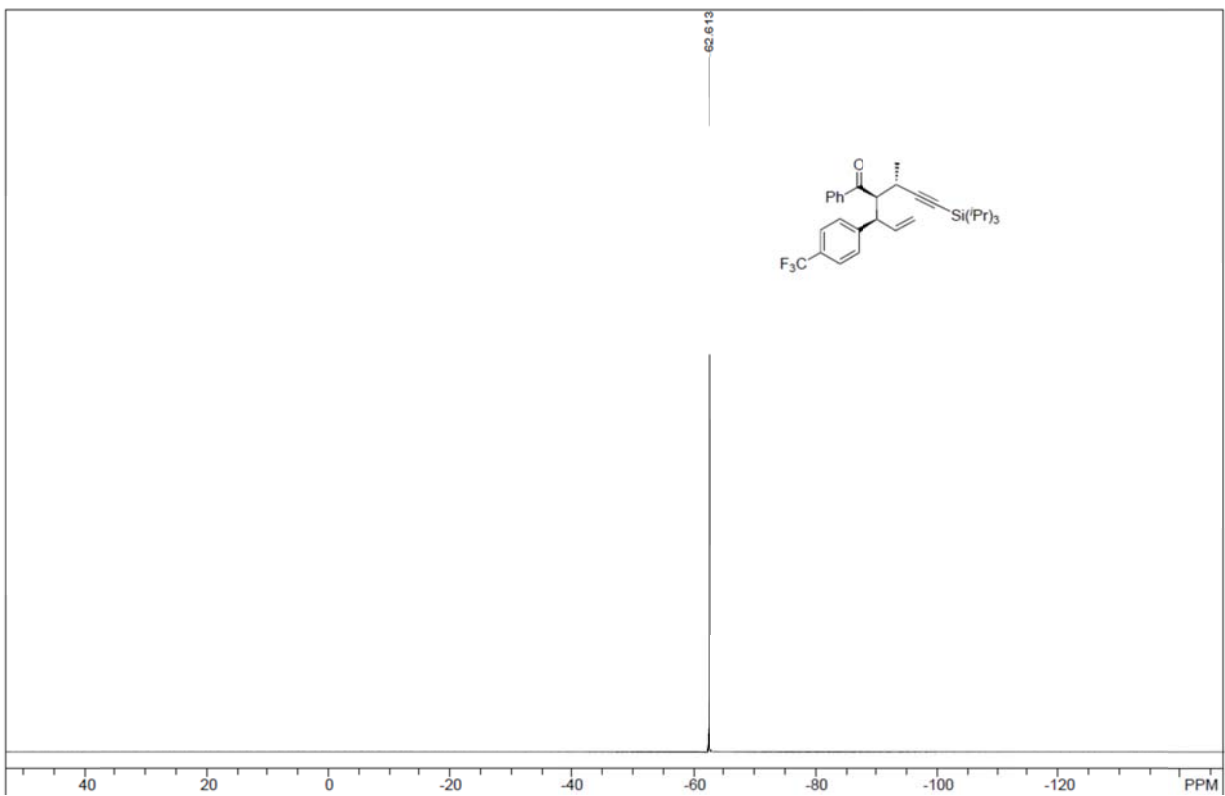

Supplementary Figure 26.  $^{19}\text{F}$  NMR spectrum for 3p.

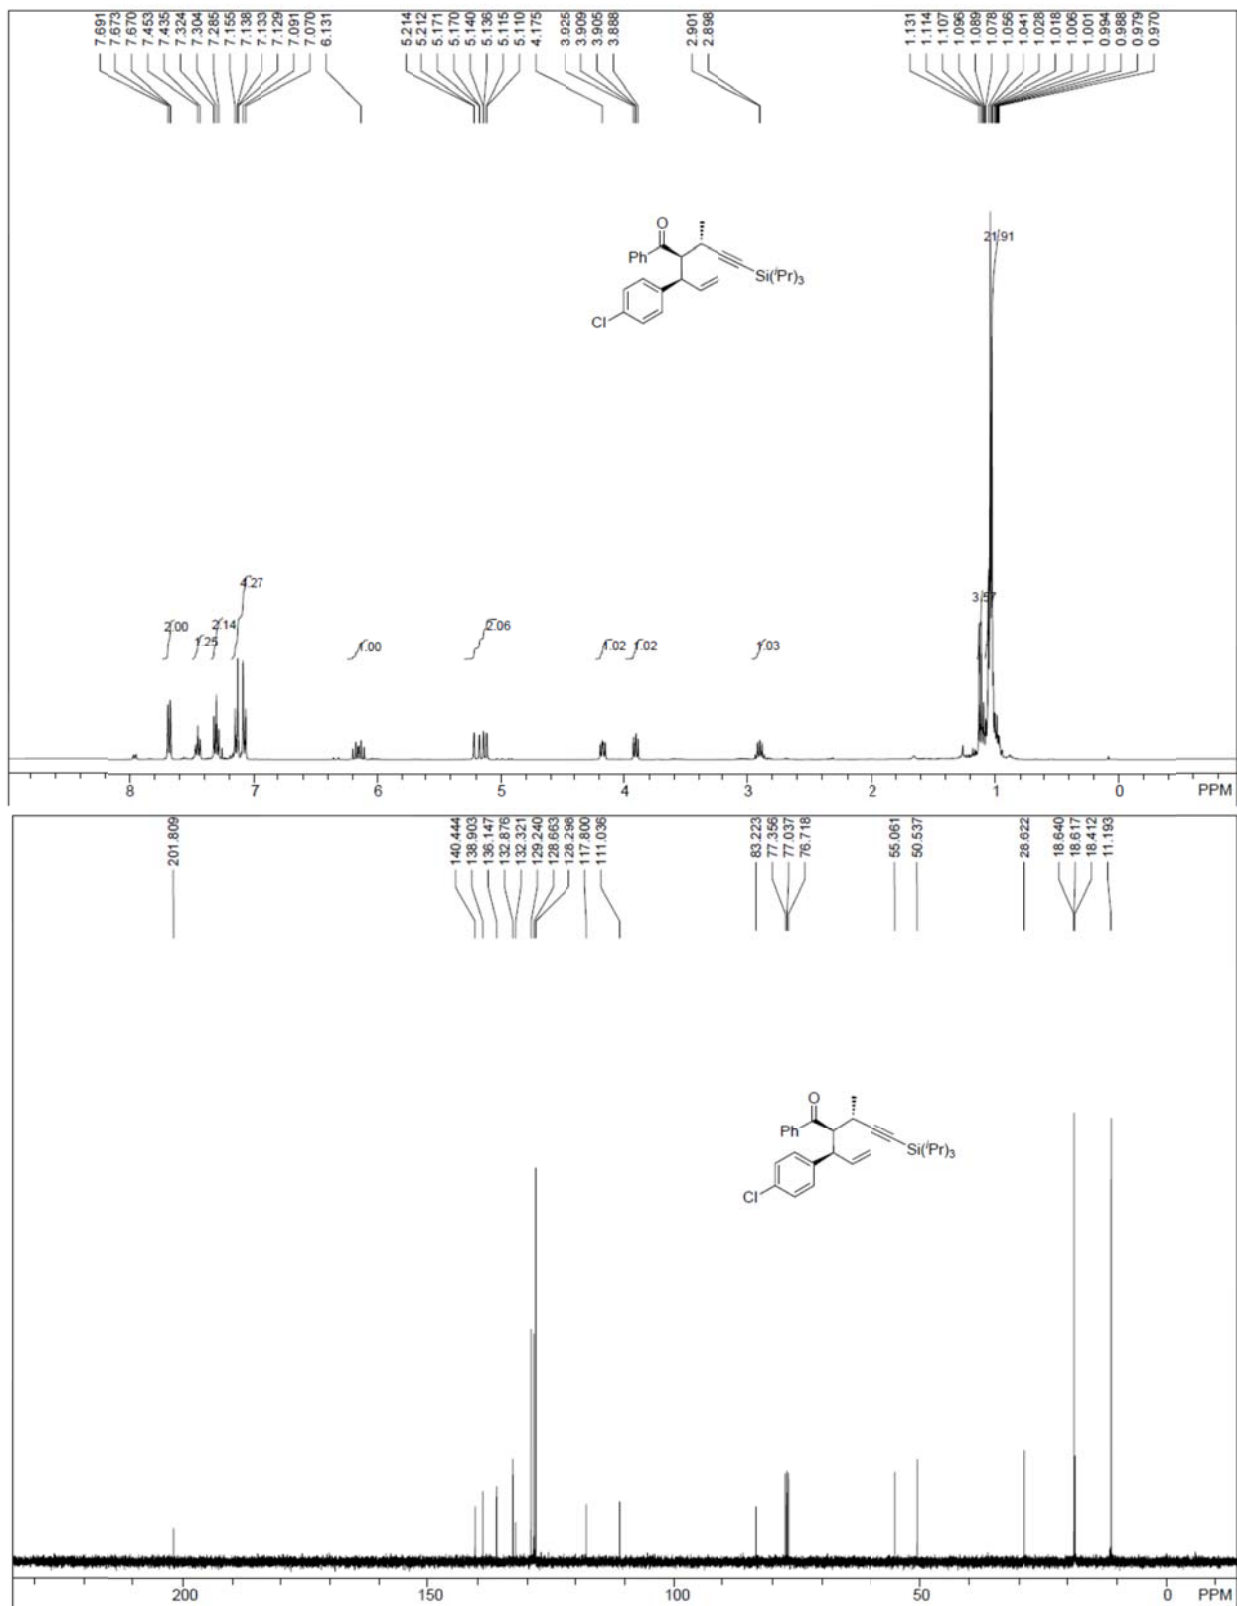

Supplementary Figure 27.  $^1\text{H}$  and  $^{13}\text{C}$  NMR spectrum for 3q.

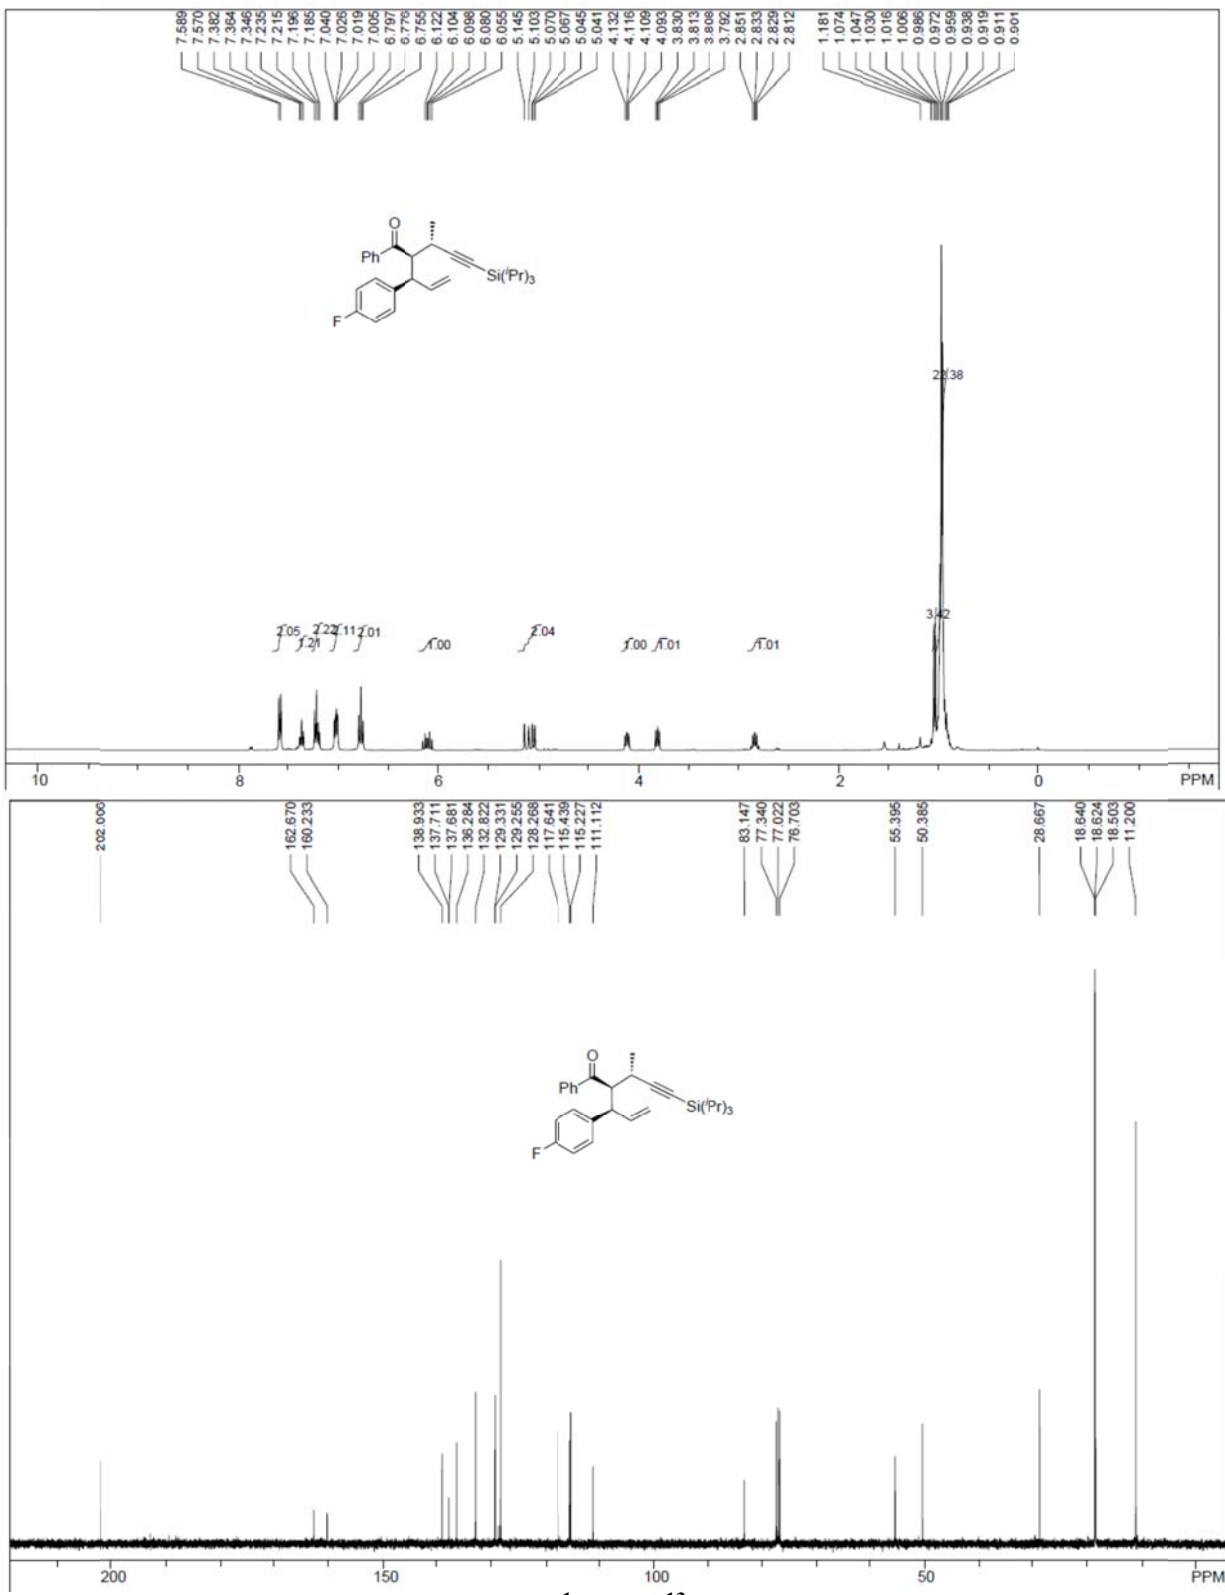

Supplementary Figure 28. <sup>1</sup>H and <sup>13</sup>C NMR spectrum for 3r.

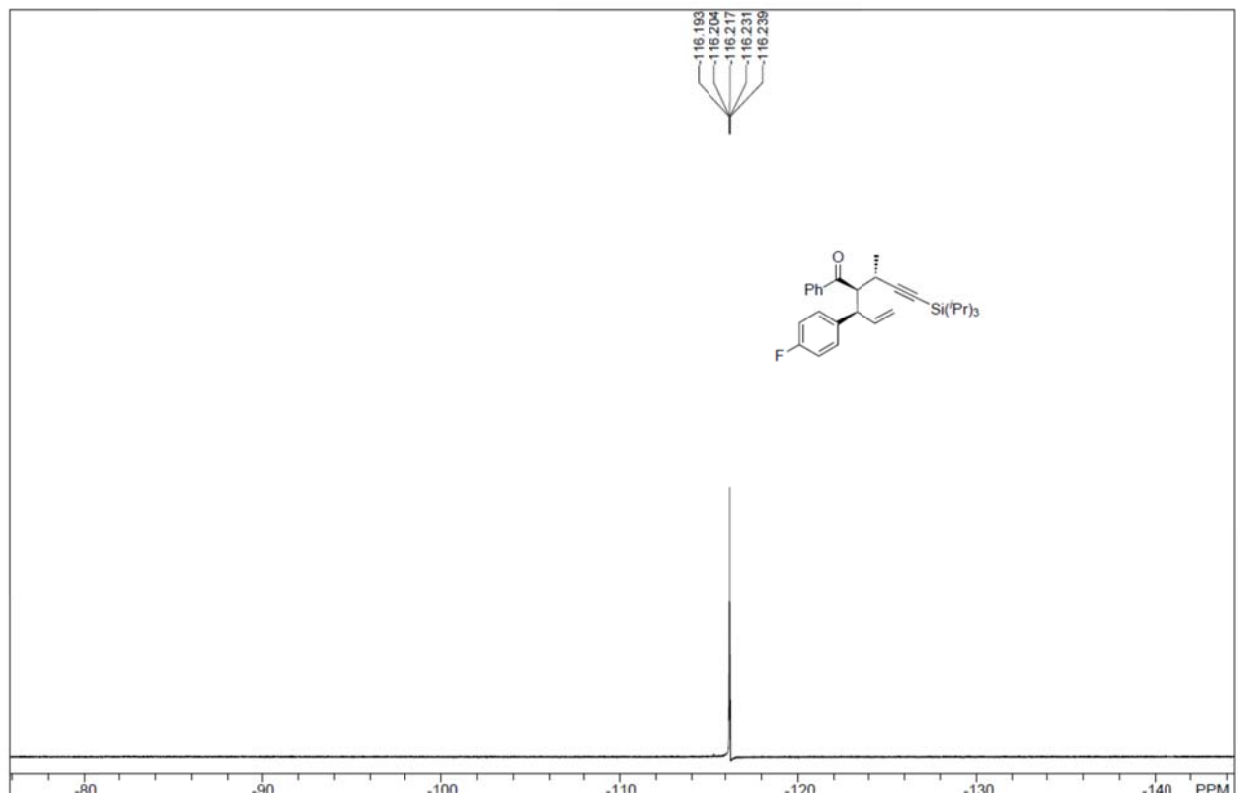

Supplementary Figure 29. <sup>19</sup>F spectrum for 3r.

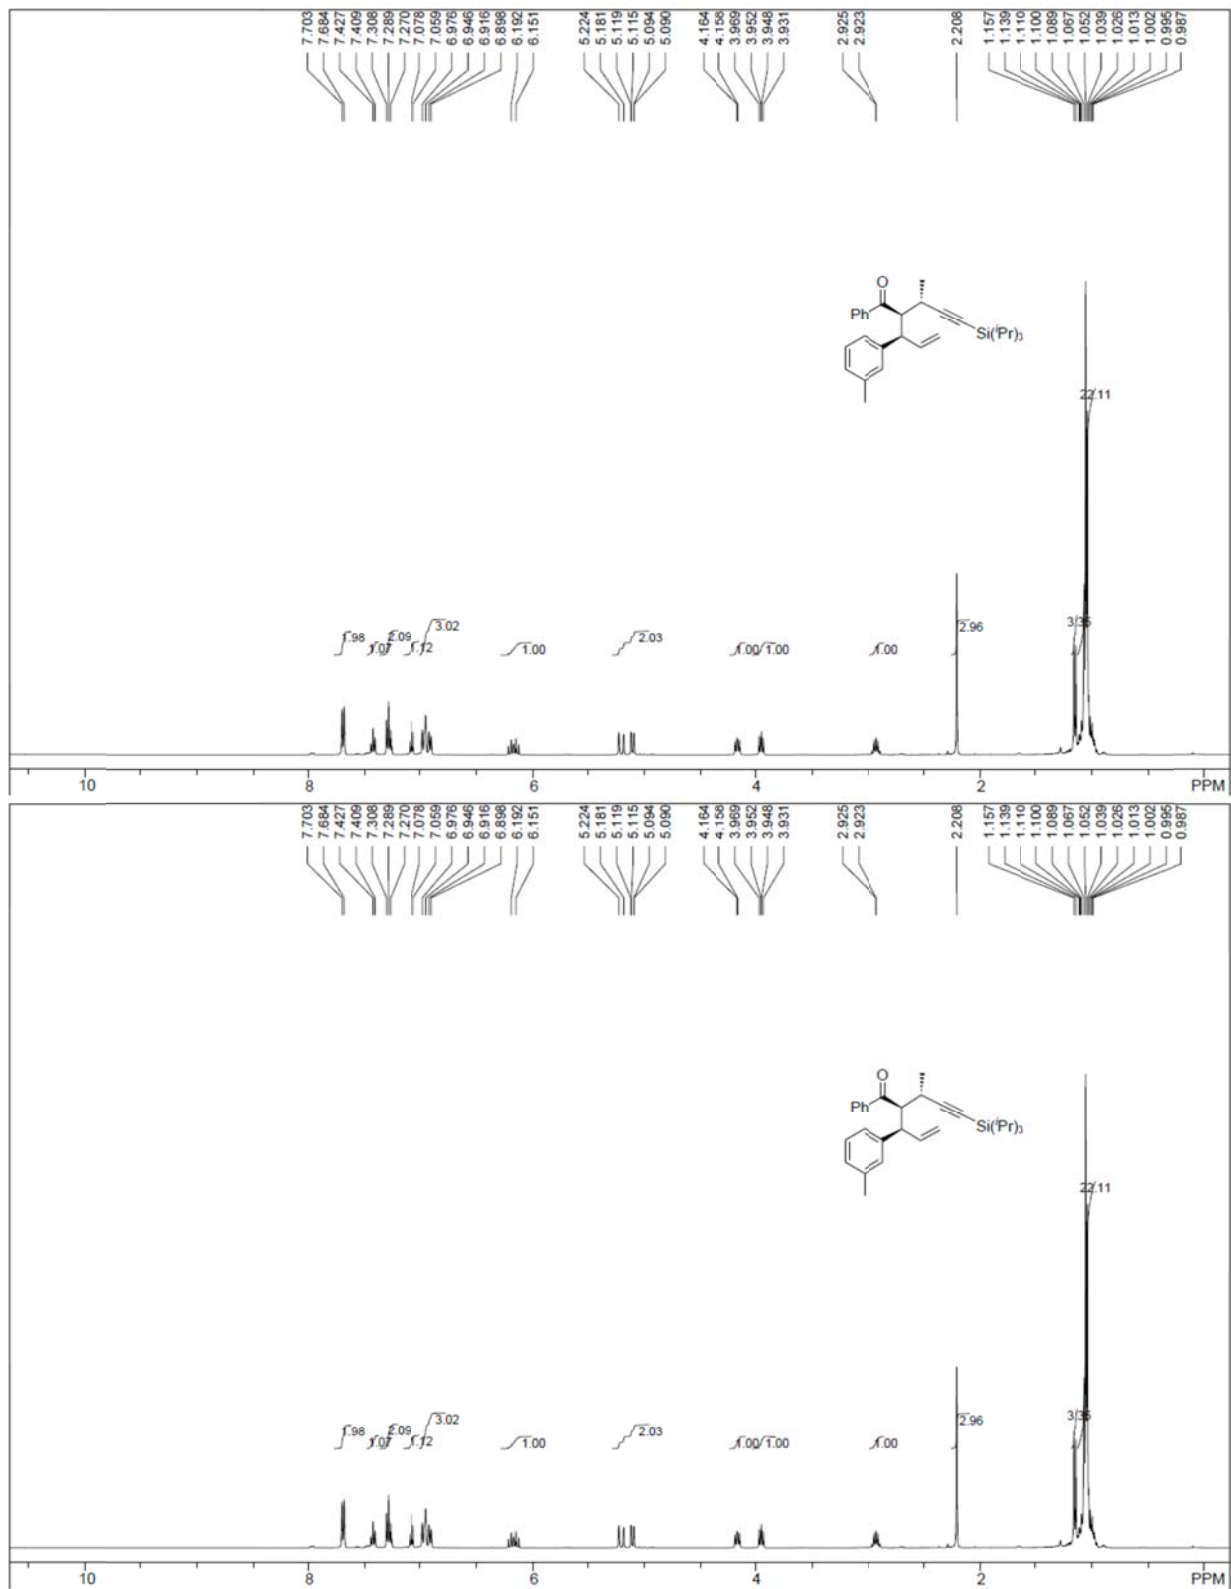

Supplementary Figure 30.  $^1\text{H}$  and  $^{13}\text{C}$  NMR spectrum for 3s.

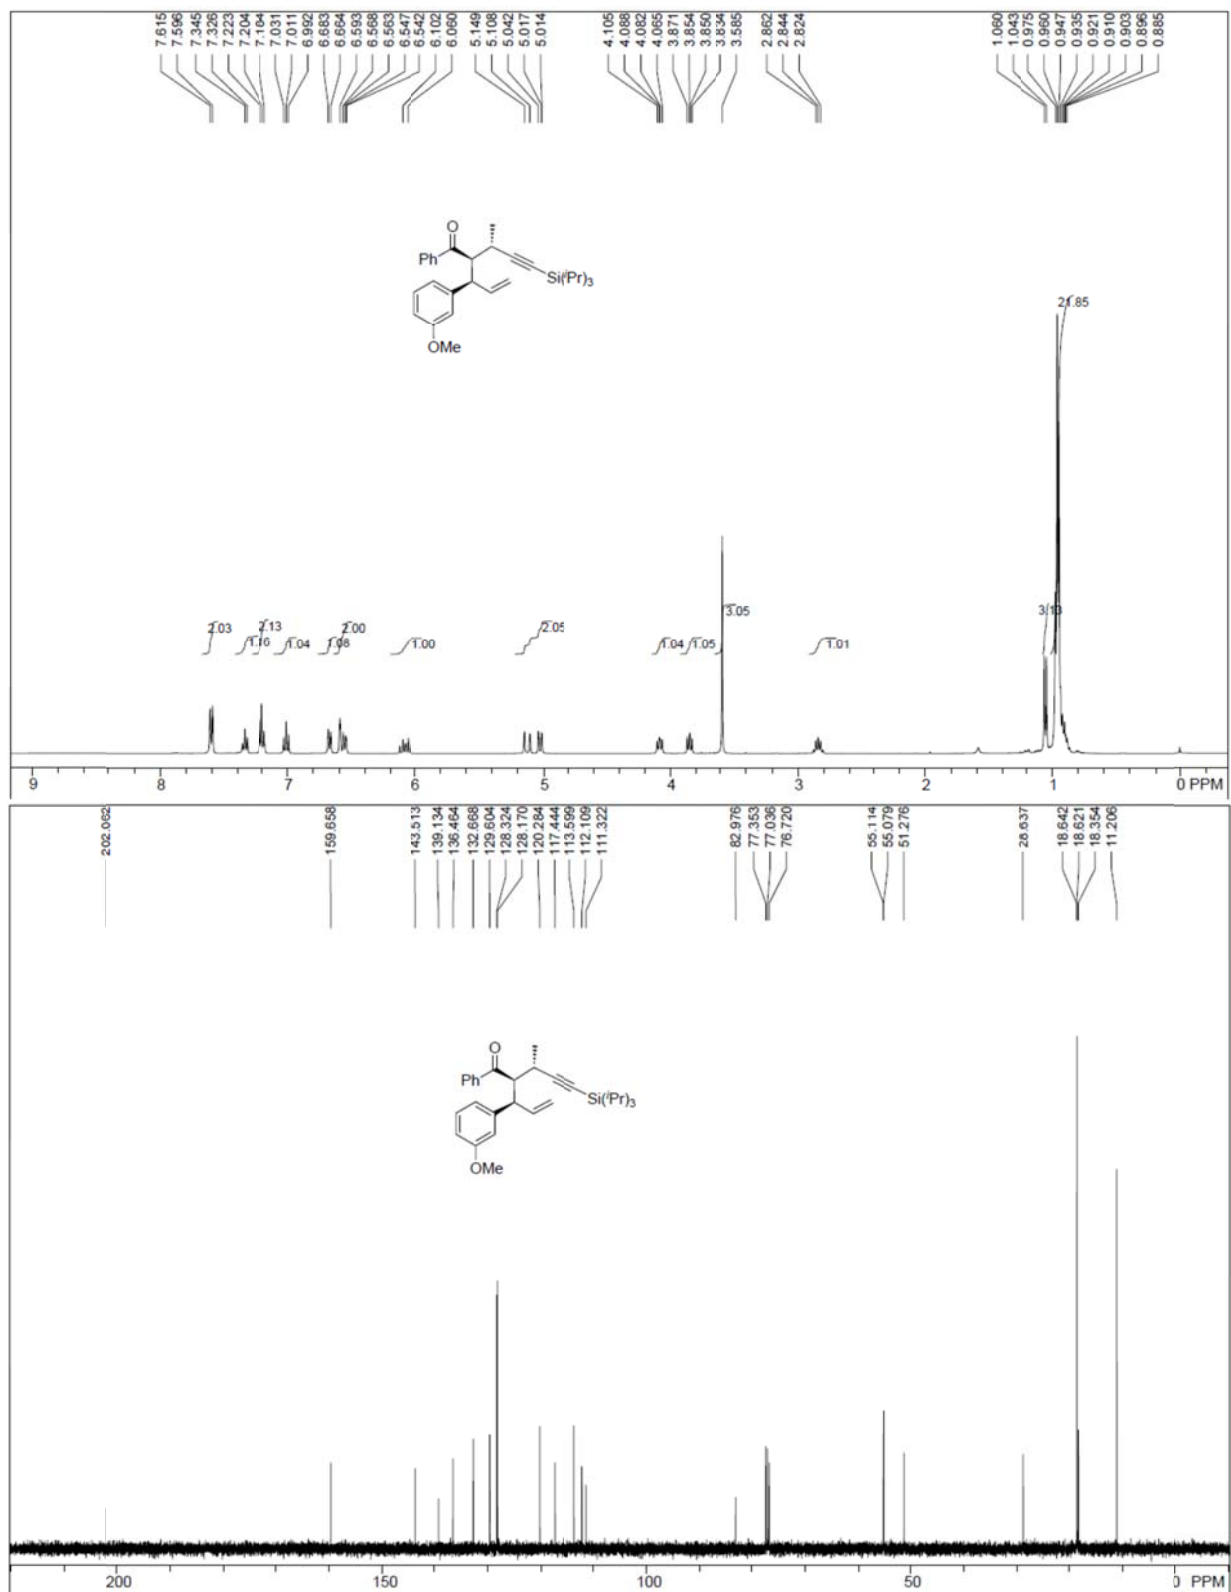

Supplementary Figure 31. <sup>1</sup>H and <sup>13</sup>C NMR spectrum for 3t.

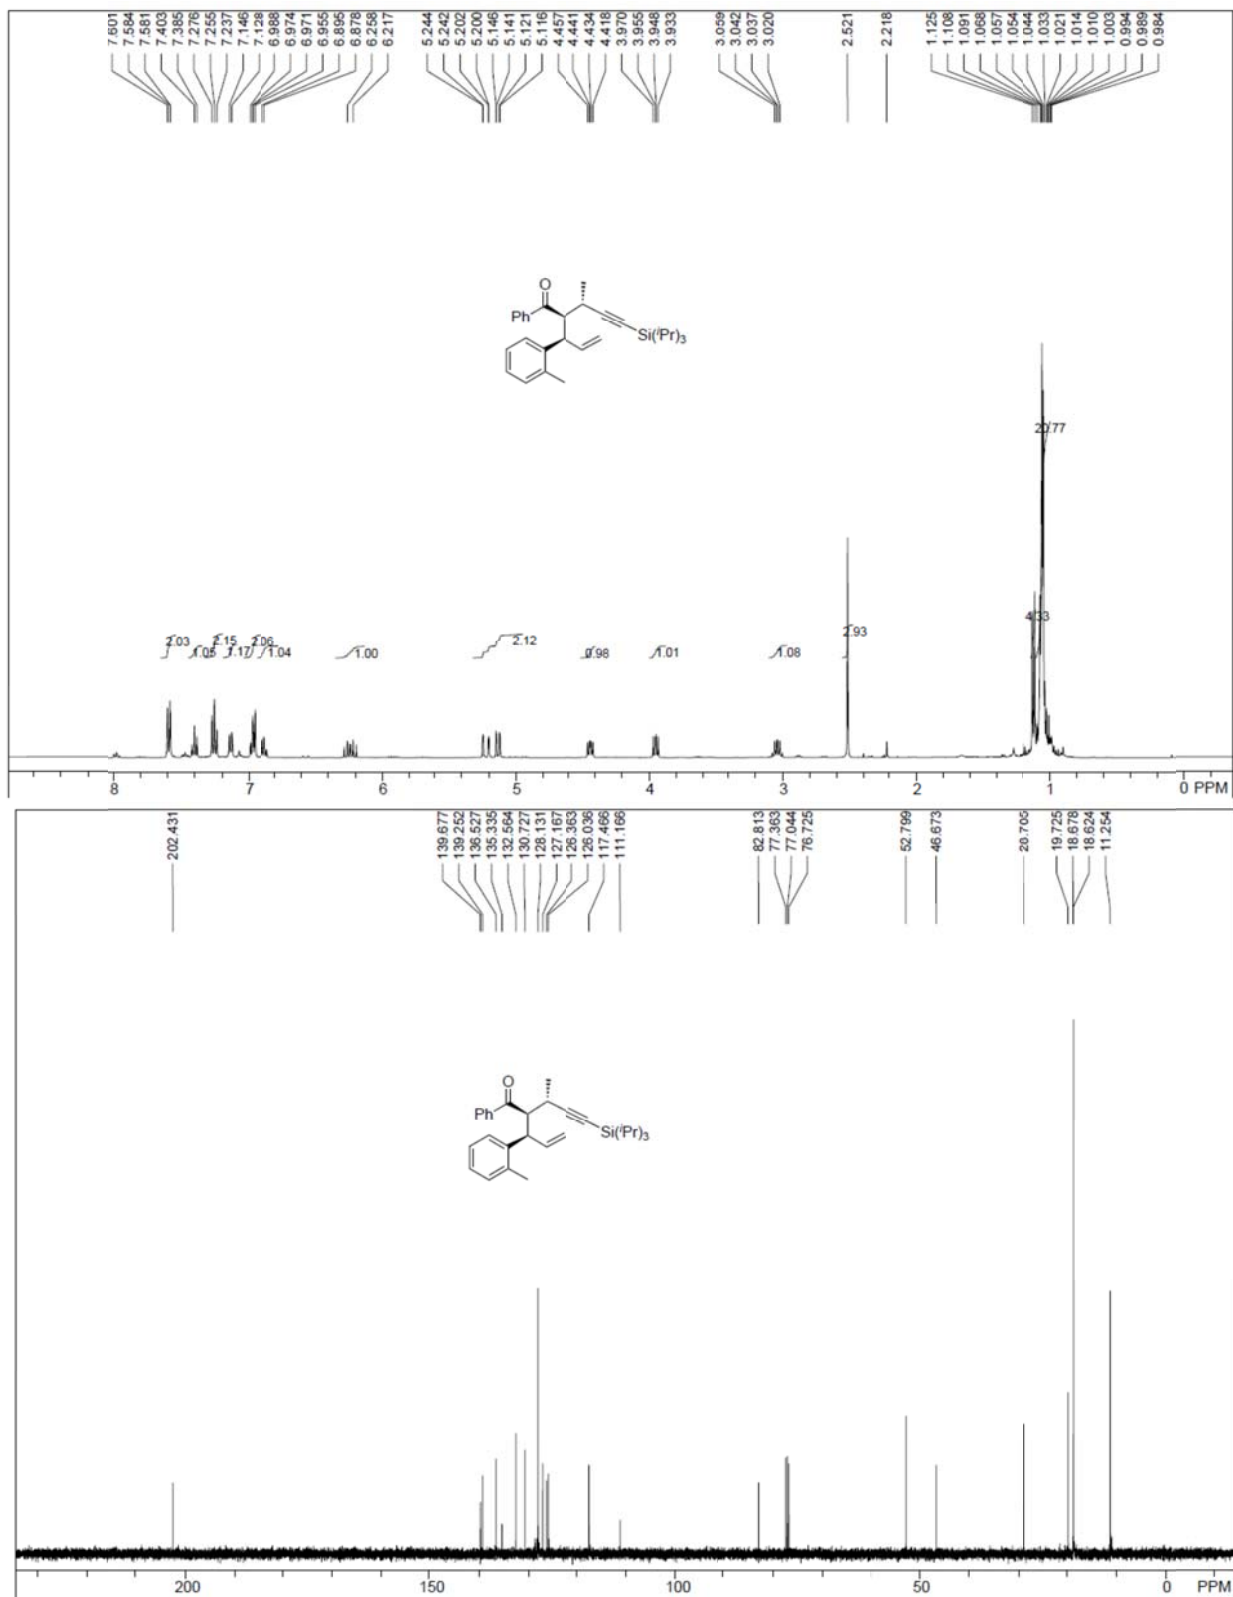

Supplementary Figure 32. <sup>1</sup>H and <sup>13</sup>C NMR spectrum for 3u.



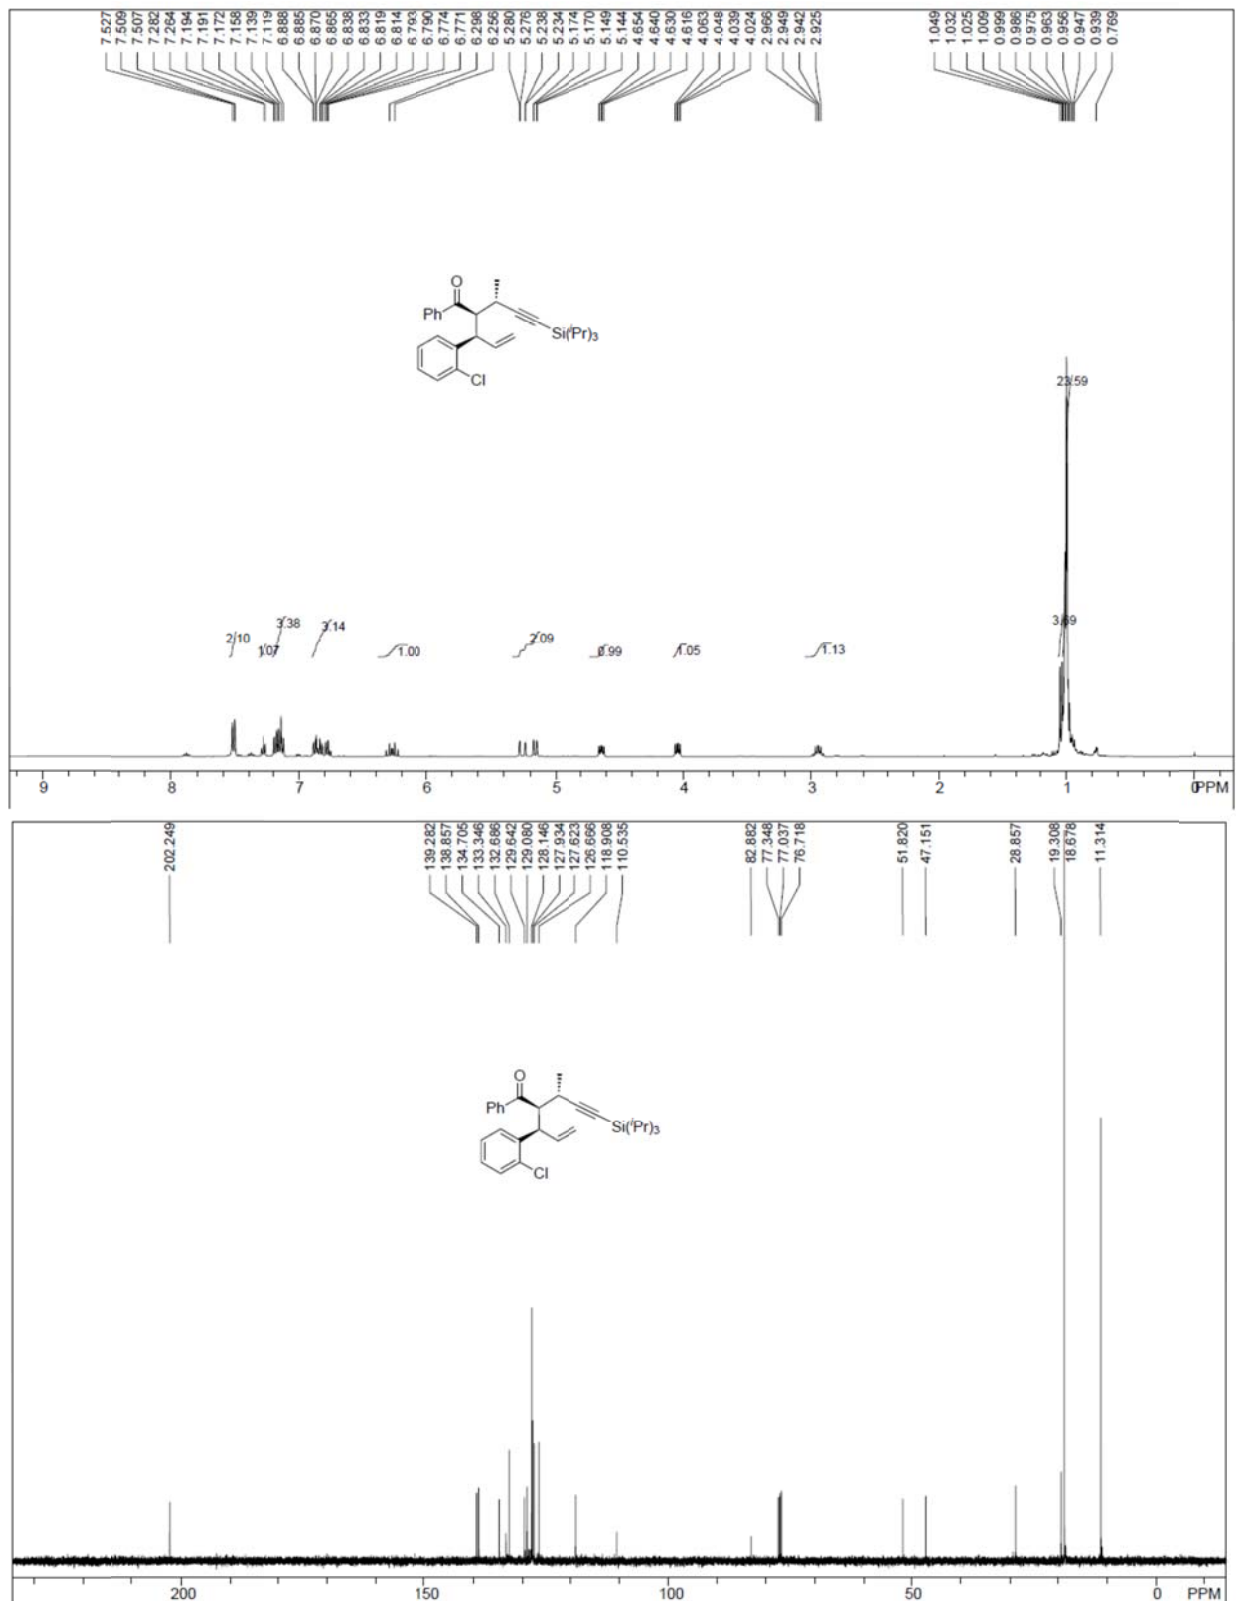

Supplementary Figure 33. <sup>1</sup>H and <sup>13</sup>C NMR spectrum for 3v.

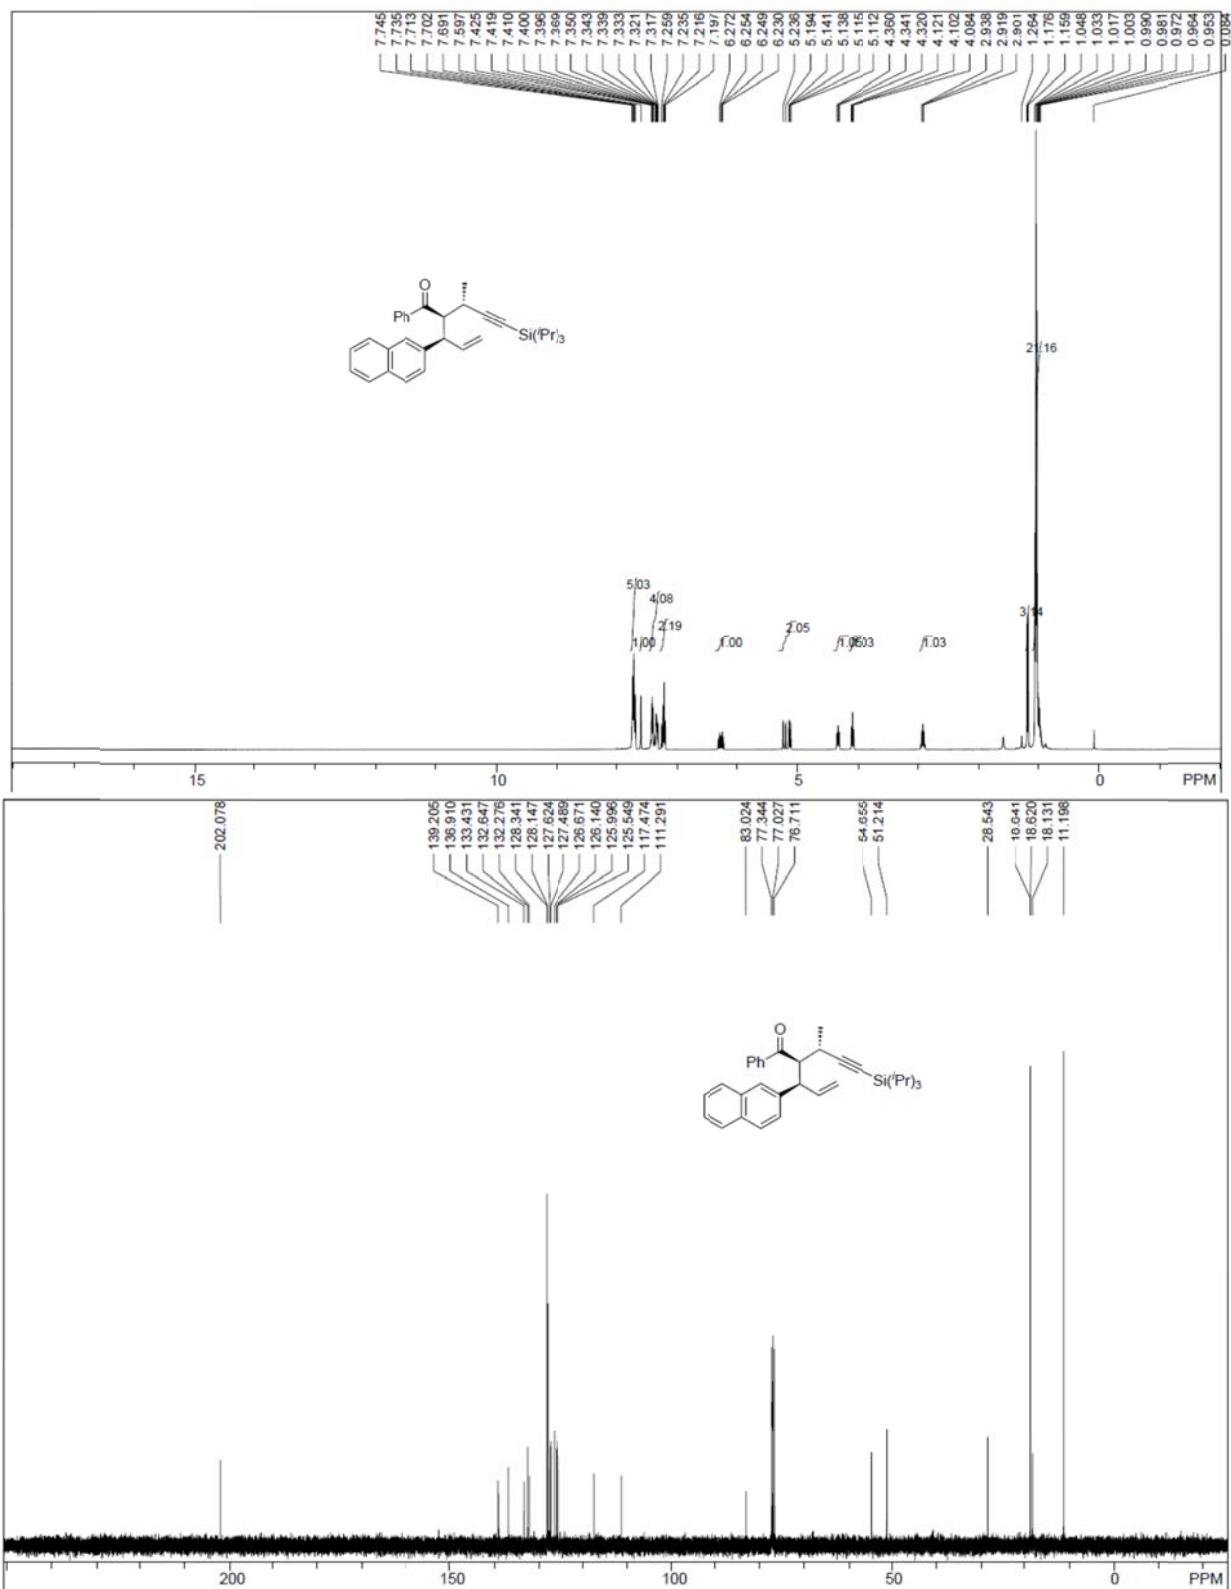

Supplementary Figure 34.  $^1\text{H}$  and  $^{13}\text{C}$  NMR spectrum for 3w.

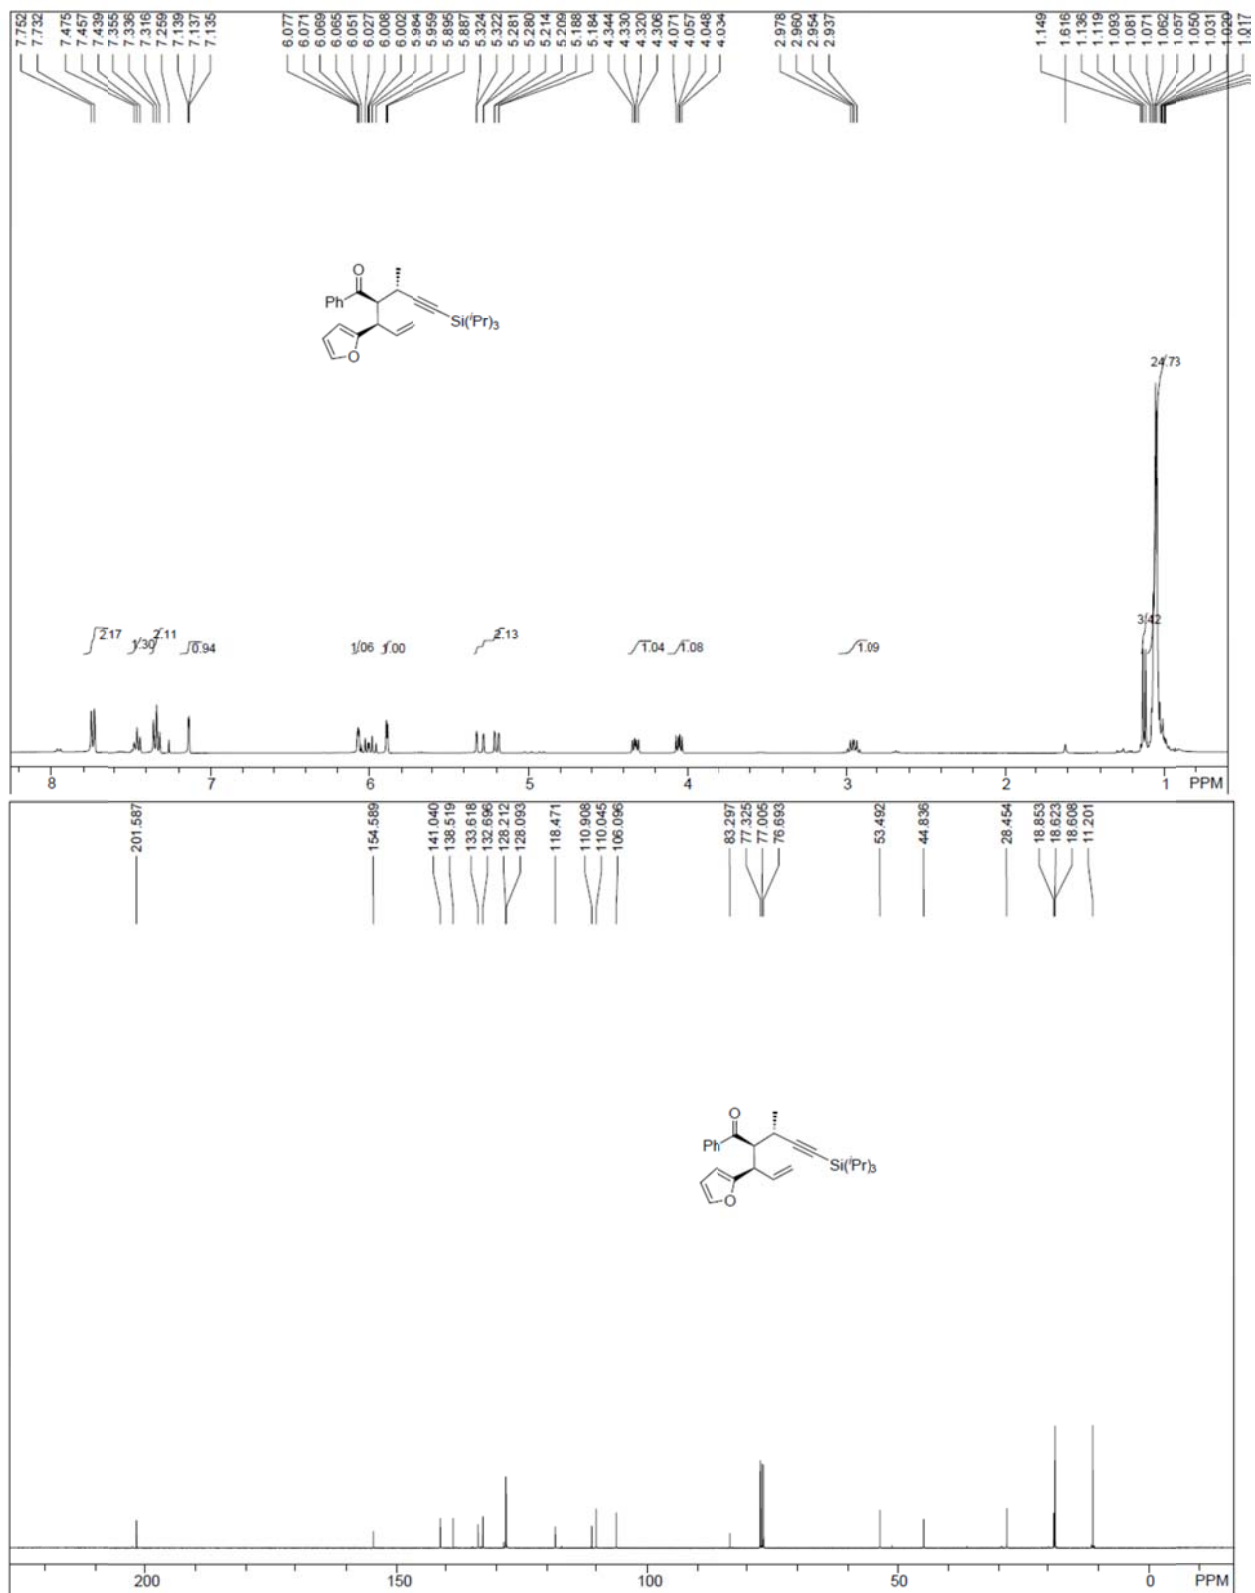

Supplementary Figure 35. <sup>1</sup>H and <sup>13</sup>C NMR spectrum for 3x.

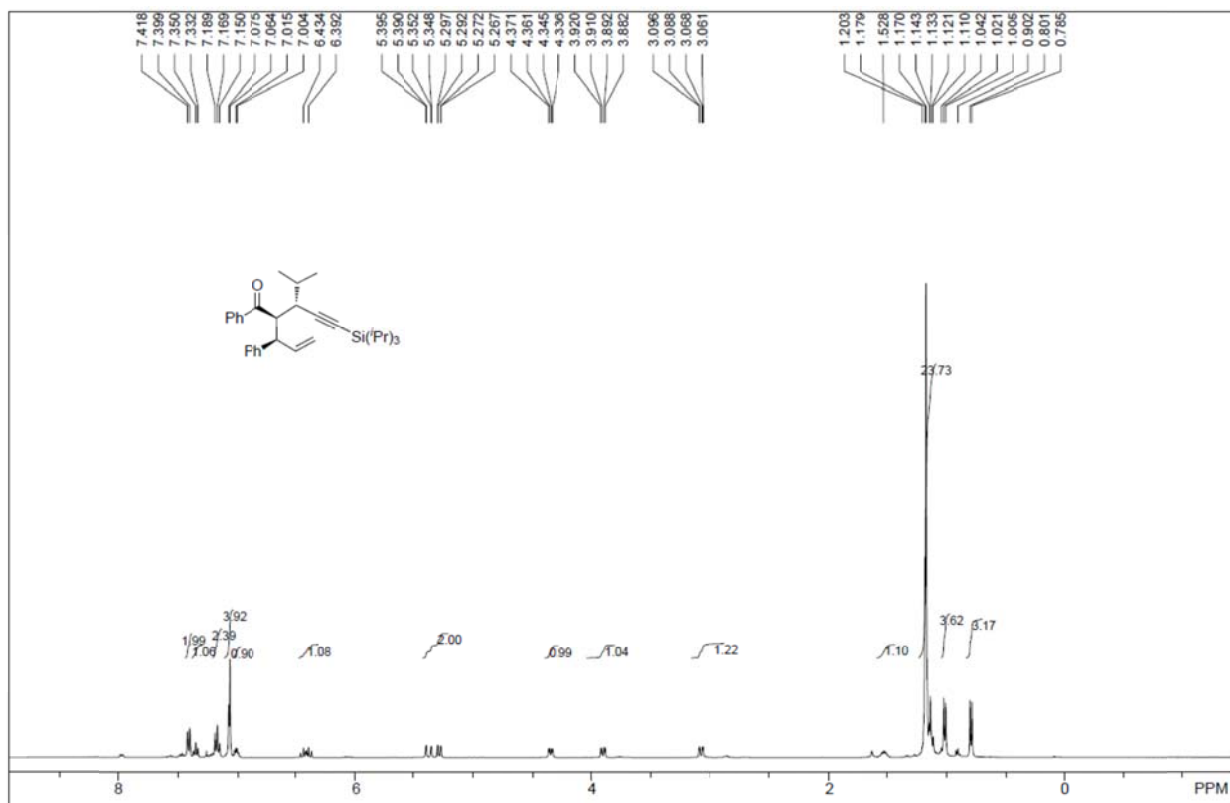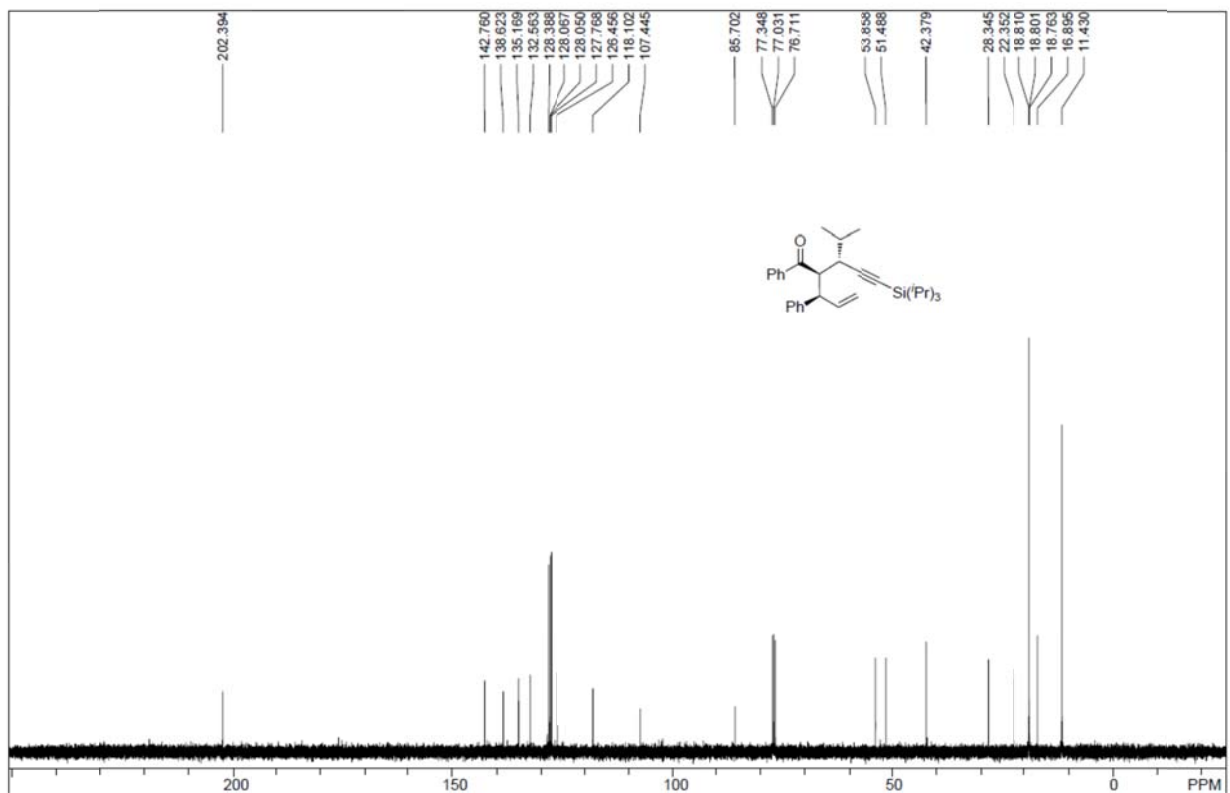

Supplementary Figure 36. <sup>1</sup>H and <sup>13</sup>C NMR spectrum for 3y.

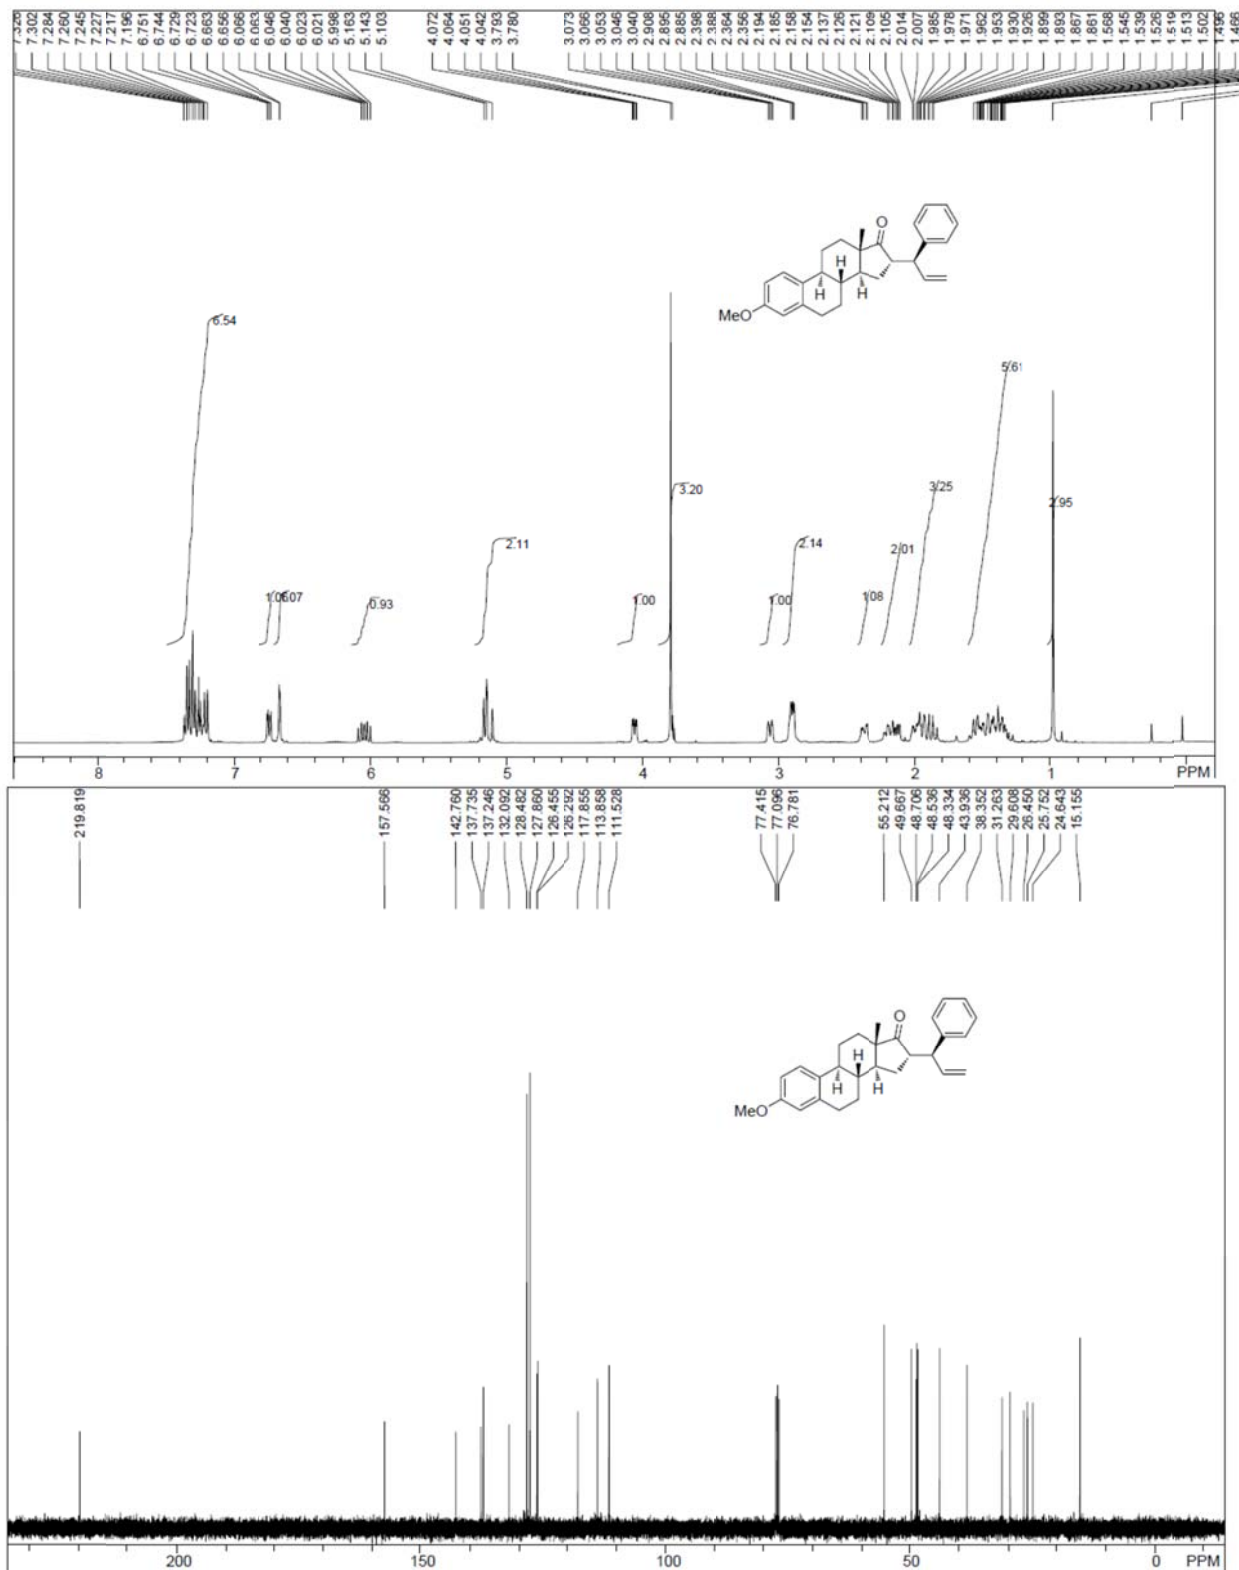

Supplementary Figure 37.  $^1\text{H}$  and  $^{13}\text{C}$  NMR spectrum for 7.

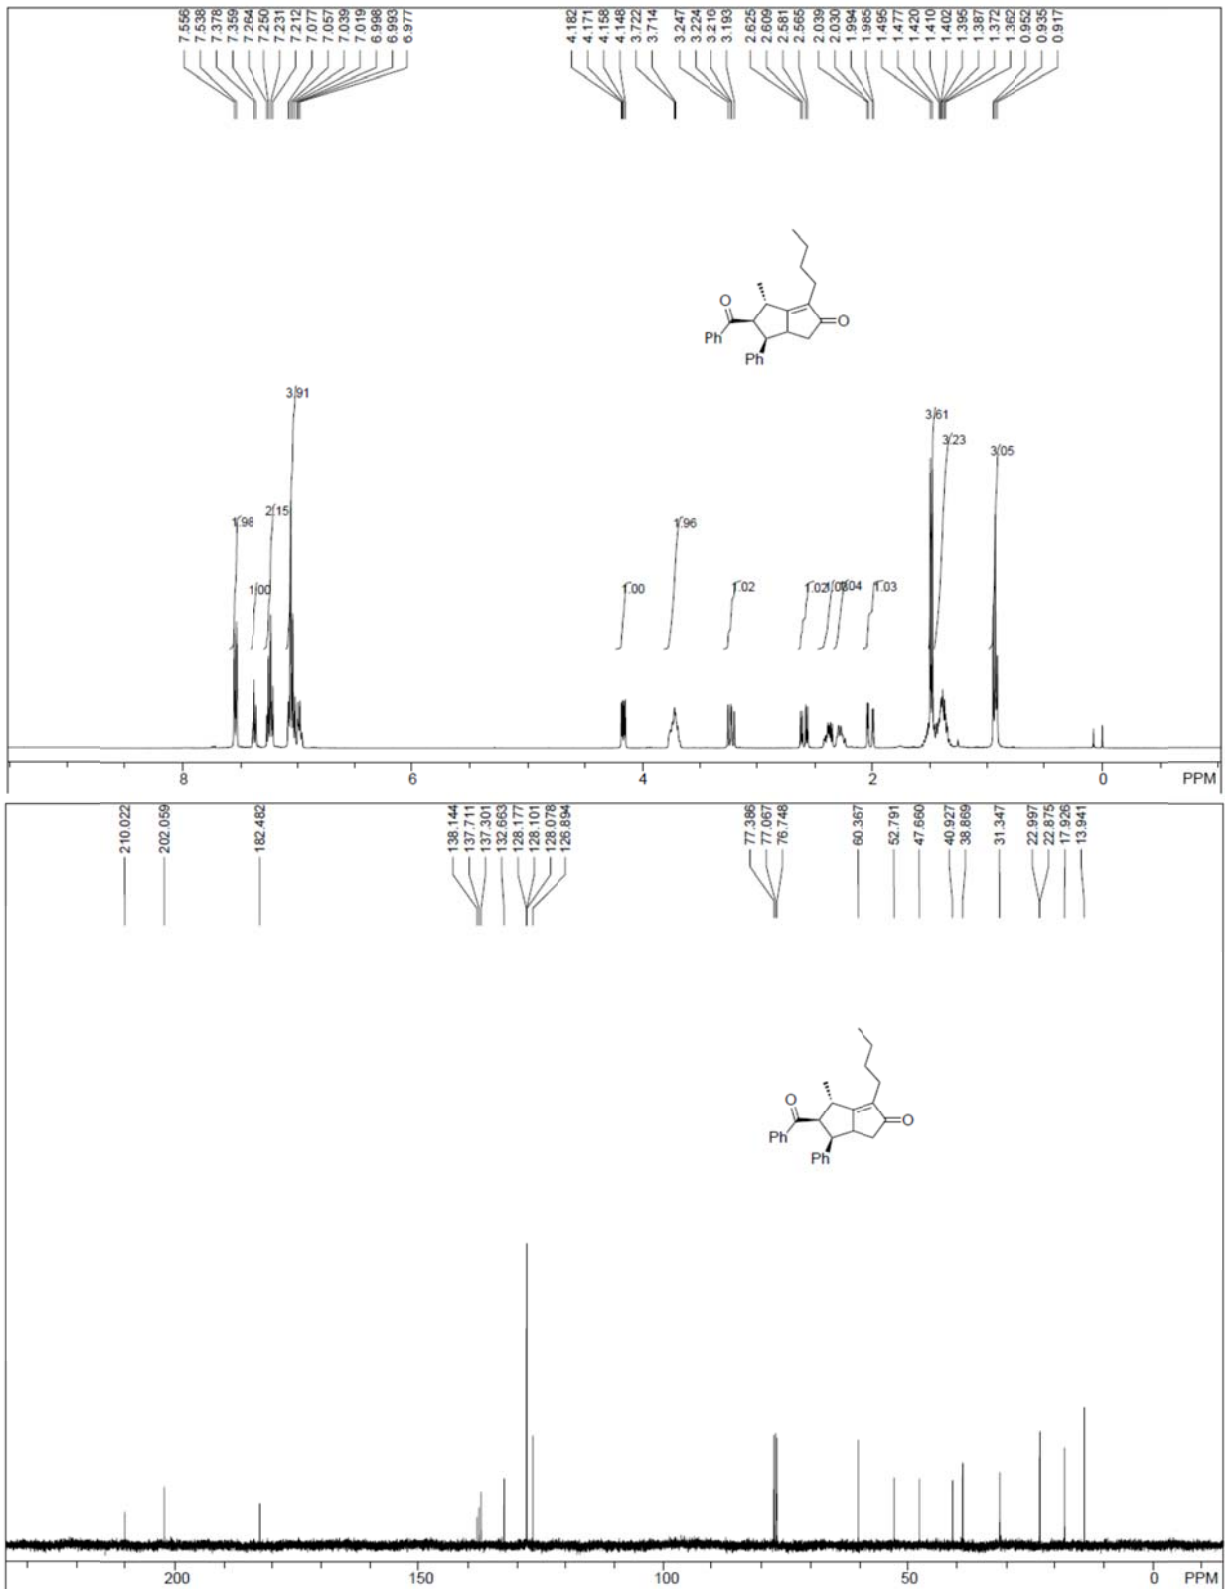

Supplementary Figure 38. <sup>1</sup>H and <sup>13</sup>C NMR spectrum for 8.

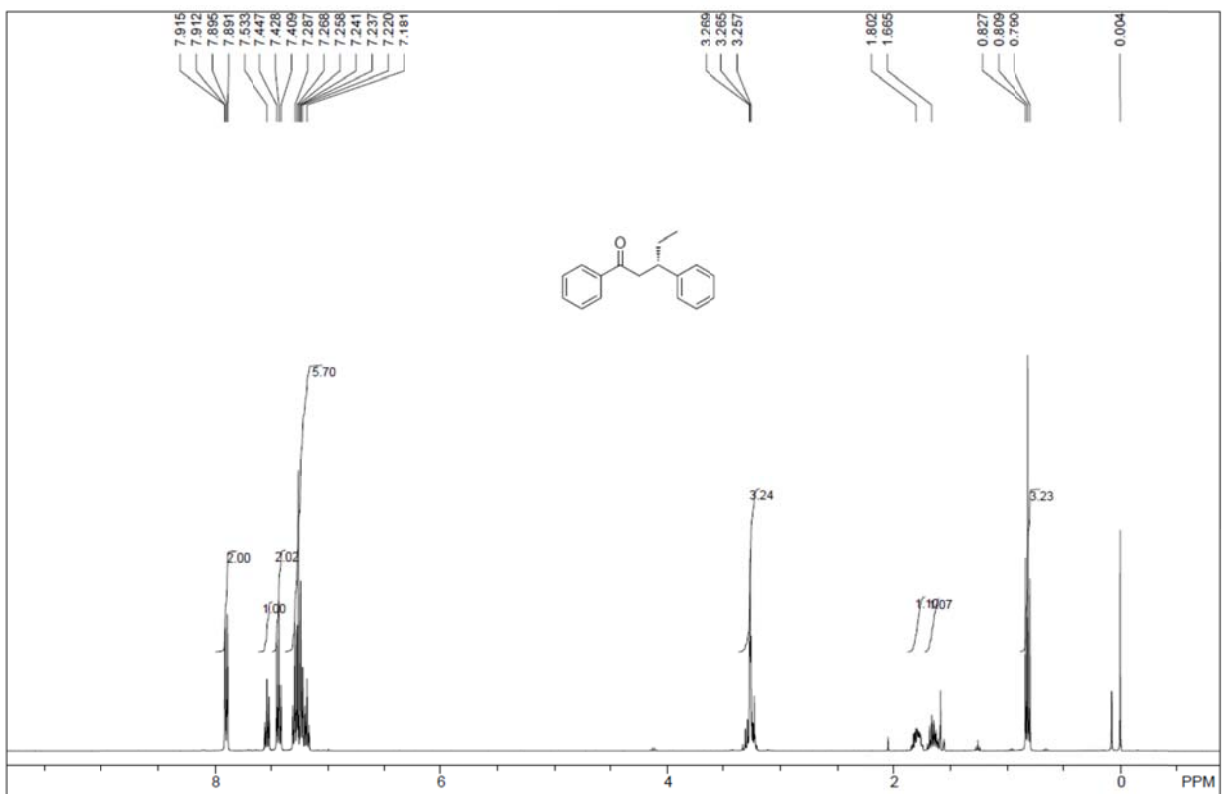

Supplementary Figure 39. <sup>1</sup>H NMR spectrum for (S)-1j.

# ==== Shimadzu LCsolution Analysis Report ====

Acquired by : Admin  
Sample Name : bdc-24-25--rac  
method : AD-H, 95/5, 1.0, 214  
Injection Volume : 1 uL  
Data File Name : bdc-24-25--rac.lcd  
Method File Name : 123.lcm  
Report File Name : Default.lcr  
Data Acquired : 2015-4-23 11:57:20  
Data Processed : 2015-4-23 12:05:48

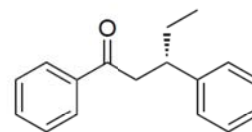

## <Chromatogram>

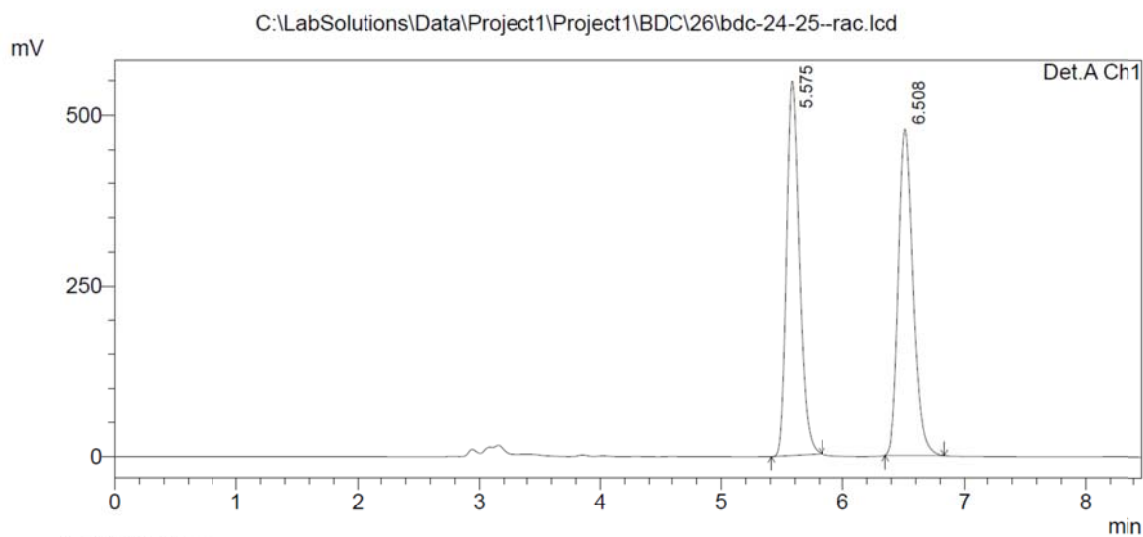

PeakTable

| Peak# | Ret. Time | Area    | Height  | Area %  |
|-------|-----------|---------|---------|---------|
| 1     | 5.575     | 4009603 | 548039  | 49.897  |
| 2     | 6.508     | 4026098 | 478011  | 50.103  |
| Total |           | 8035702 | 1026050 | 100.000 |

Supplementary Figure 40. HPLC spectrum for *rac-1j*.



# ==== Shimadzu LCsolution Analysis Report ====

C:\LabSolutions\Data\Project1\Project1\BDC\26\bdc-24-25--.lcd  
Acquired by : Admin  
Sample Name : bdc-24-25--  
method : AD-H, 95/5, 1.0, 214  
Injection Volume : 1 uL  
Data File Name : bdc-24-25--.lcd  
Method File Name : 123.lcm  
Report File Name : Default.lcr  
Data Acquired : 2015-4-23 11:46:59  
Data Processed : 2015-4-23 11:56:15

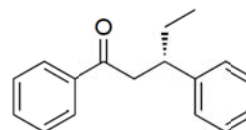

## <Chromatogram>

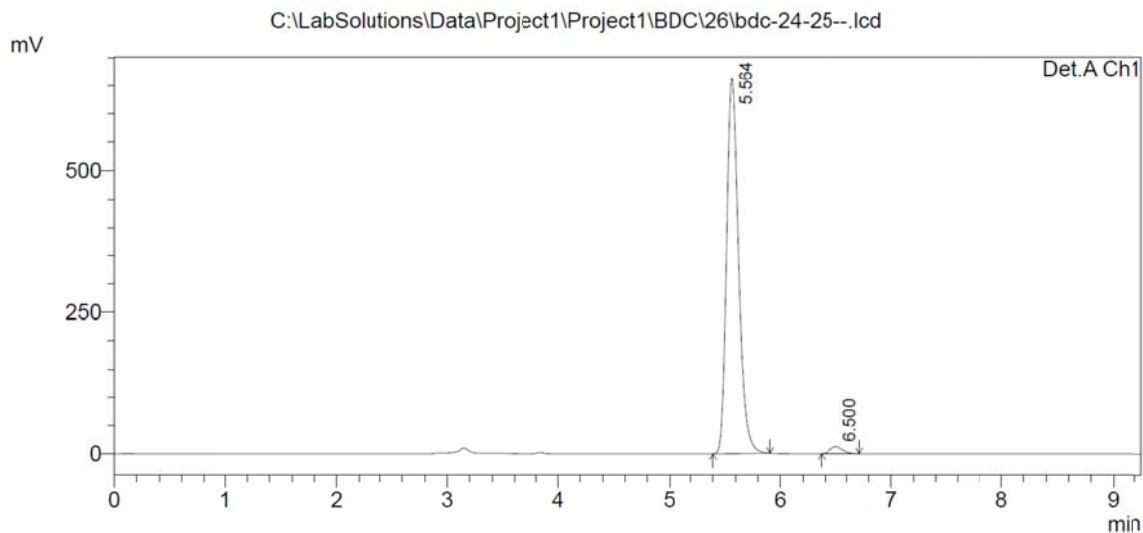

PeakTable

| Peak# | Ret. Time | Area    | Height | Area %  |
|-------|-----------|---------|--------|---------|
| 1     | 5.564     | 4910943 | 663860 | 97.975  |
| 2     | 6.500     | 101480  | 12610  | 2.025   |
| Total |           | 5012423 | 676470 | 100.000 |

Supplementary Figure 41. HPLC spectrum for (S)-1j.

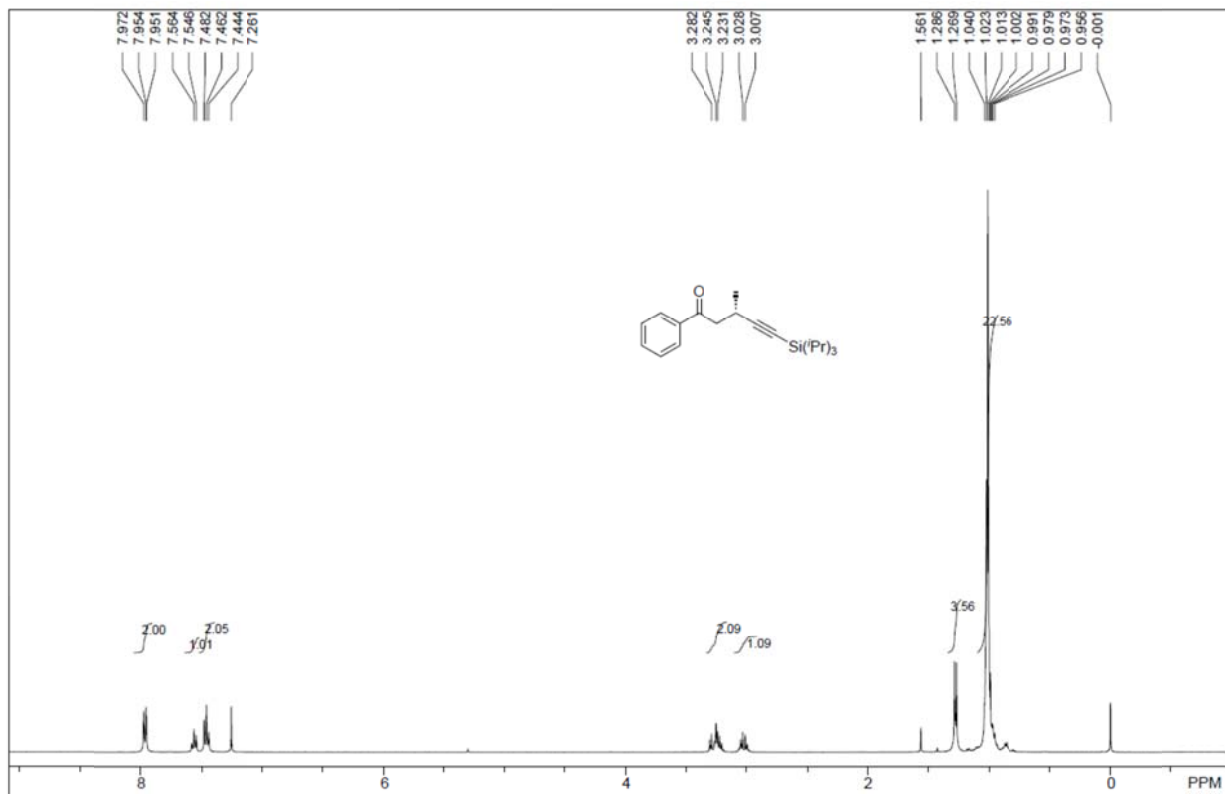

Supplementary Figure 42. <sup>1</sup>H NMR spectrum for (S)-11.

```

=====
Acq. Operator   : █████
Sample Operator : █████
Acq. Instrument : SFC                               Location : Vial 74
Injection Date  : 4/24/2015 3:58:09 PM
                                                    Inj Volume : 5.000 µl

Acq. Method    : C:\CHEM32\1\METHODS\AGILENT_SFC6.M
Last changed   : 4/24/2015 3:10:21 PM by █████
                (modified after loading)
Analysis Method : C:\CHEM32\1\METHODS\AGILENT_SFC6.M
Last changed   : 4/27/2015 9:57:16 AM by █████
                (modified after loading)
Additional Info : Peak(s) manually integrated
  
```

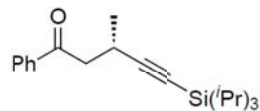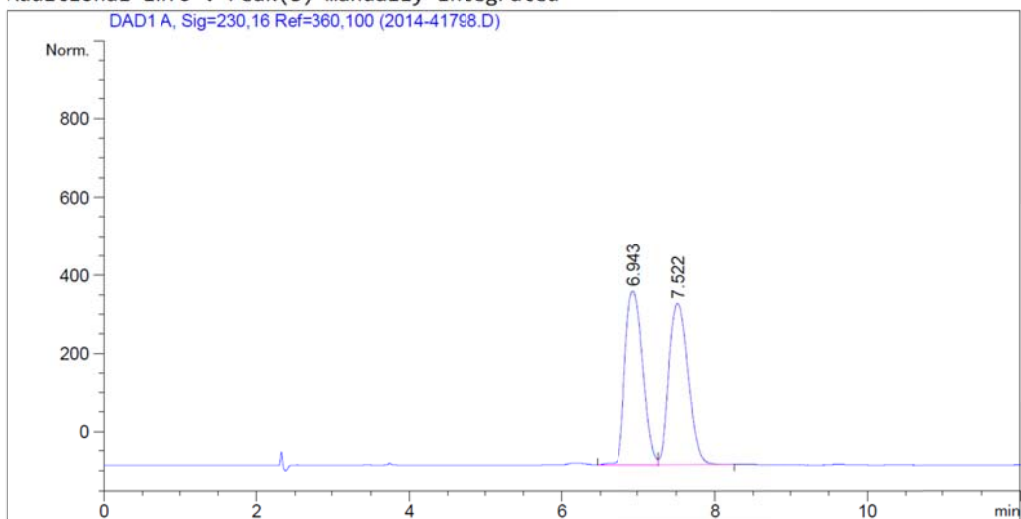

```

=====
                          Area Percent Report
=====
  
```

```

Sorted By      :      Signal
Multiplier     :      1.0000
Dilution       :      1.0000
Do not use Multiplier & Dilution Factor with ISTDs
  
```

Signal 1: DAD1 A, Sig=230,16 Ref=360,100

| Peak # | RetTime [min] | Type | Width [min] | Area [mAU*s] | Height [mAU] | Area %  |
|--------|---------------|------|-------------|--------------|--------------|---------|
| 1      | 6.943         | BV   | 0.2601      | 4276.85596   | 266.66382    | 49.9585 |
| 2      | 7.522         | VB   | 0.2809      | 4283.96484   | 247.54297    | 50.0415 |

```
Totals :                               8560.82080  514.20679
```

**Supplementary Figure 43. HPLC spectrum for *rac*-11.**

```

=====
Acq. Operator   : █████
Sample Operator : █████
Acq. Instrument : SFC                               Location : Vial 75
Injection Date  : 4/24/2015 3:33:05 PM
                                                    Inj Volume : 5.000 µl
Acq. Method     : C:\CHEM32\1\METHODS\AGILENT_SFC6.M
Last changed    : 4/24/2015 3:10:21 PM by █████
                  (modified after loading)
Analysis Method : C:\CHEM32\1\METHODS\AGILENT_SFC6.M
Last changed    : 4/27/2015 9:58:43 AM by █████
                  (modified after loading)
Additional Info  : Peak(s) manually integrated
  
```

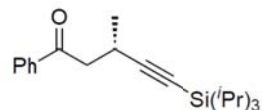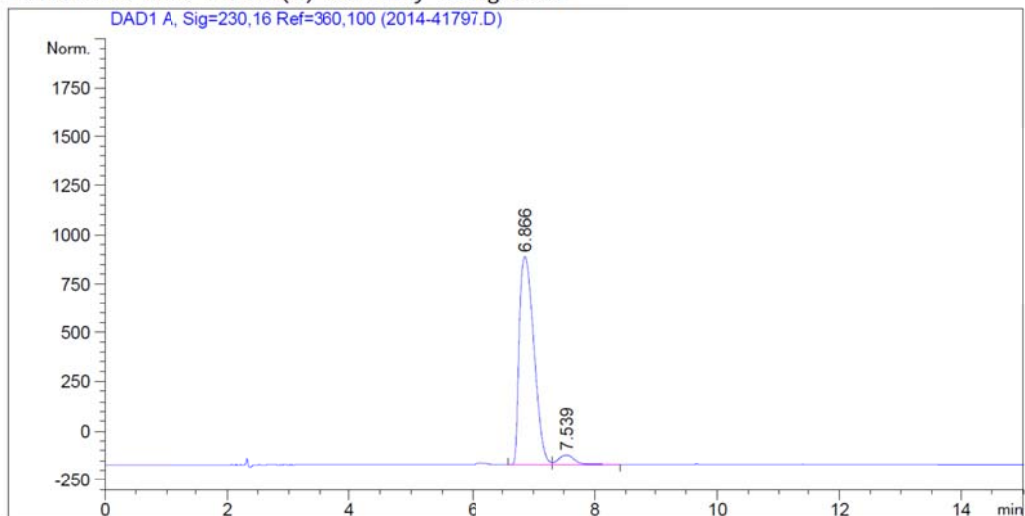

```

=====
                          Area Percent Report
=====
  
```

```

Sorted By      :      Signal
Multiplier     :      1.0000
Dilution       :      1.0000
Do not use Multiplier & Dilution Factor with ISTDs
  
```

Signal 1: DAD1 A, Sig=230,16 Ref=360,100

| Peak # | RetTime [min] | Type | Width [min] | Area [mAU*s] | Height [mAU] | Area %  |
|--------|---------------|------|-------------|--------------|--------------|---------|
| 1      | 6.866         | BV   | 0.2637      | 1.16703e4    | 714.10529    | 95.0300 |
| 2      | 7.539         | VB   | 0.2943      | 610.35144    | 32.32950     | 4.9700  |

```
Totals :                      1.22806e4  746.43479
```

**Supplementary Figure 44. HPLC spectrum for (S)-11.**

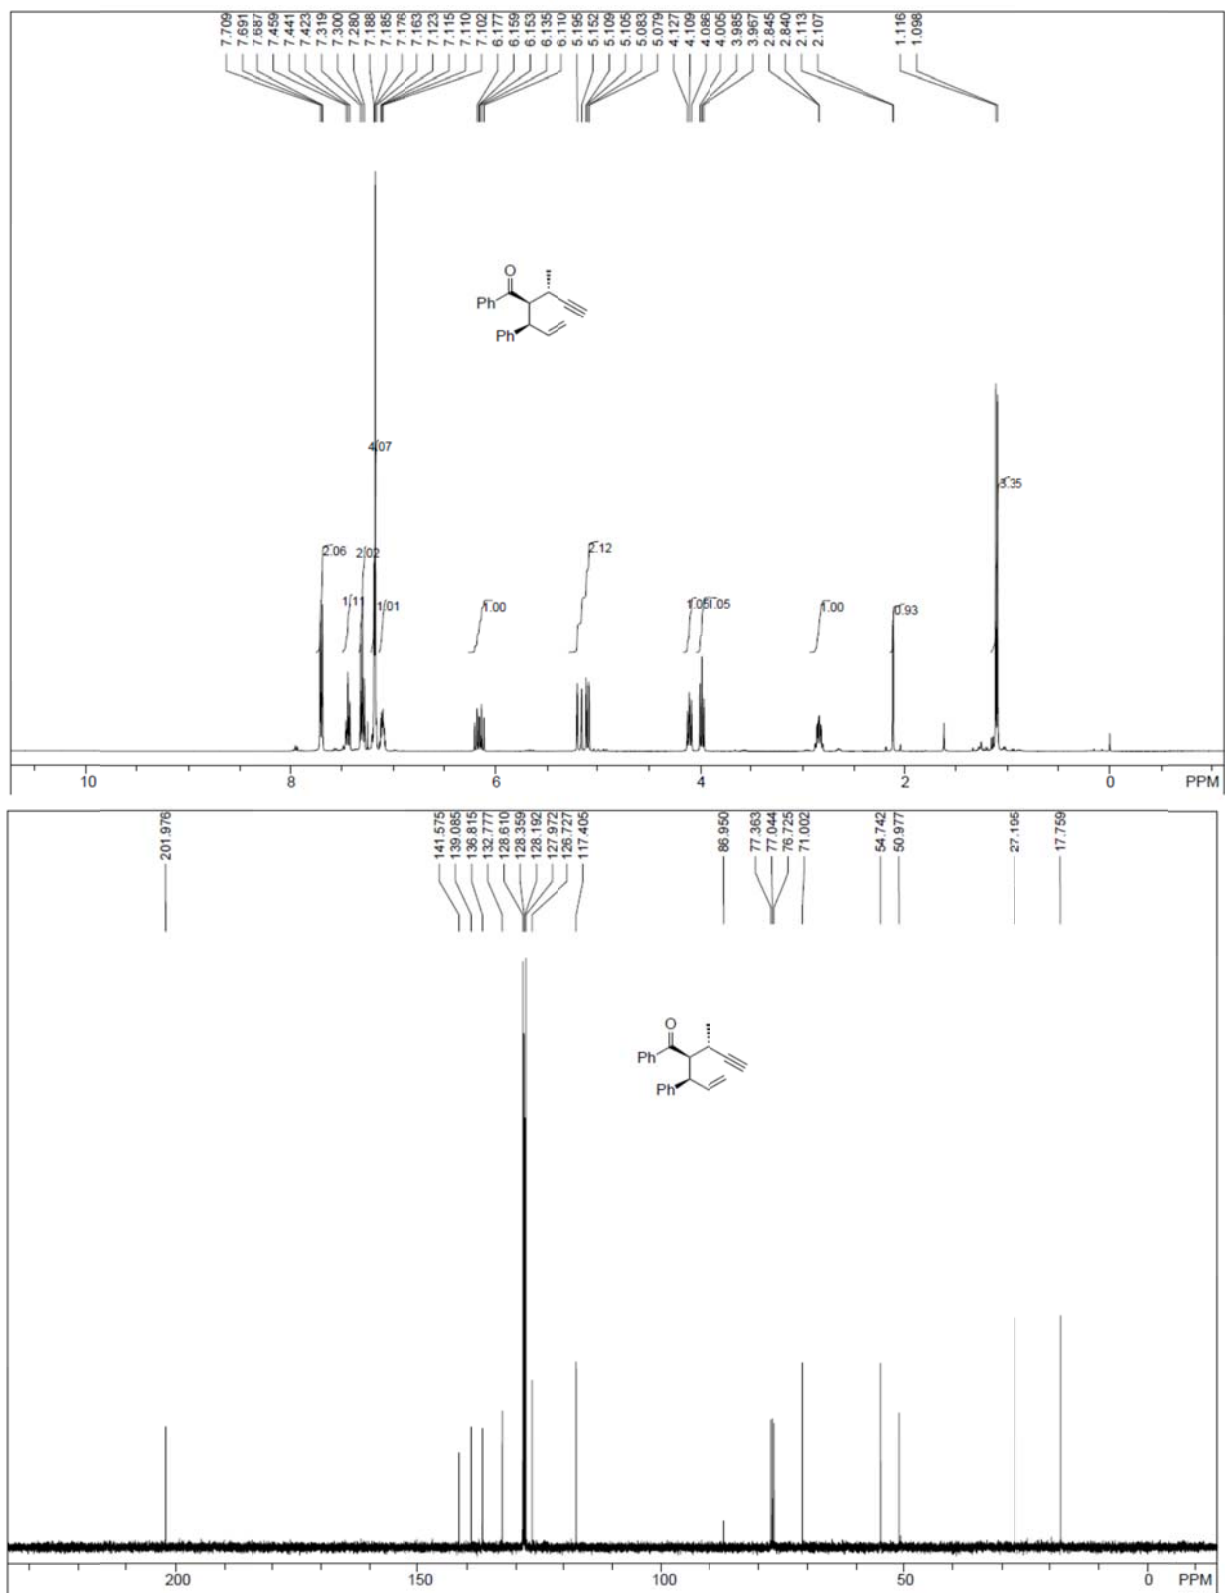

Supplementary Figure 45. <sup>1</sup>H and <sup>13</sup>C NMR spectrum for 9.

```

=====
Acq. Operator   : █████
Sample Operator : █████
Acq. Instrument : SFC                               Location : Vial 11
Injection Date  : 1/23/2015 9:37:48 AM
                                                    Inj Volume : 5.000 µl

Acq. Method     : C:\CHEM32\1\METHODS\AGILENT_SFC6.M
Last changed    : 1/23/2015 9:27:42 AM by █████
                  (modified after loading)
Analysis Method : C:\CHEM32\1\METHODS\AGILENT_SFC6.M
Last changed    : 1/23/2015 3:35:00 PM by █████
                  (modified after loading)
Additional Info  : Peak(s) manually integrated
  
```

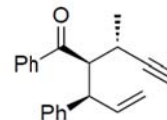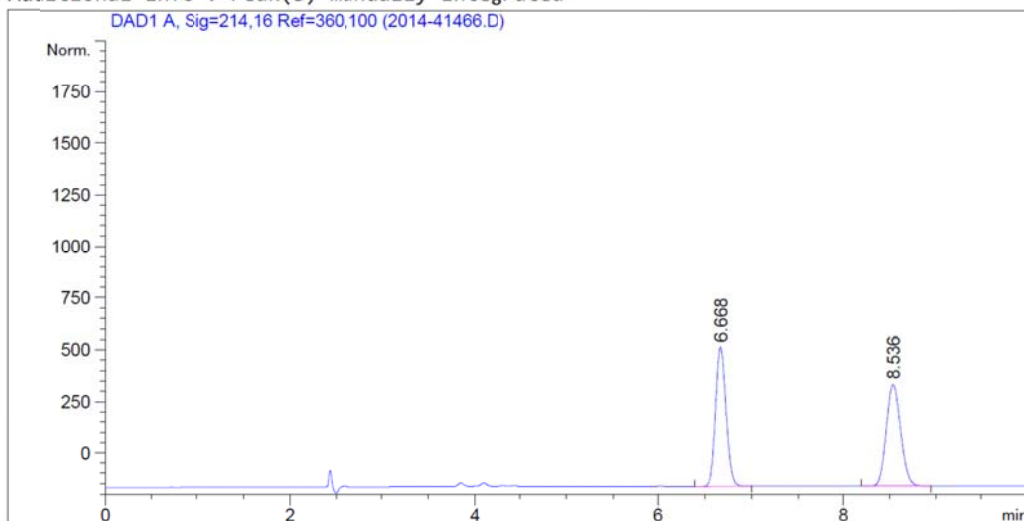

```

=====
                          Area Percent Report
=====
  
```

```

Sorted By      :      Signal
Multiplier     :      1.0000
Dilution       :      1.0000
Do not use Multiplier & Dilution Factor with ISTDs
  
```

Signal 1: DAD1 A, Sig=214,16 Ref=360,100

| Peak # | RetTime [min] | Type | Width [min] | Area [mAU*s] | Height [mAU] | Area %  |
|--------|---------------|------|-------------|--------------|--------------|---------|
| 1      | 6.668         | BB   | 0.1222      | 2539.32983   | 324.84845    | 49.7984 |
| 2      | 8.536         | BB   | 0.1673      | 2559.88770   | 238.39680    | 50.2016 |

```
Totals :                5099.21753  563.24525
```

```
=====
```

**Supplementary Figure 46. HPLC spectrum for rac-9.**

```

=====
Acq. Operator   : █████
Sample Operator : █████
Acq. Instrument : SFC                               Location : Vial 16
Injection Date  : 1/23/2015 10:03:10 AM           Inj Volume : 5.000 µl

Acq. Method     : C:\CHEM32\1\METHODS\AGILENT_SFC6.M
Last changed    : 1/23/2015 9:27:42 AM by █████
                  (modified after loading)
Analysis Method : C:\CHEM32\1\METHODS\AGILENT_SFC6.M
Last changed    : 1/23/2015 3:39:51 PM by █████
                  (modified after loading)
Additional Info  : Peak(s) manually integrated
  
```

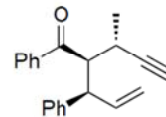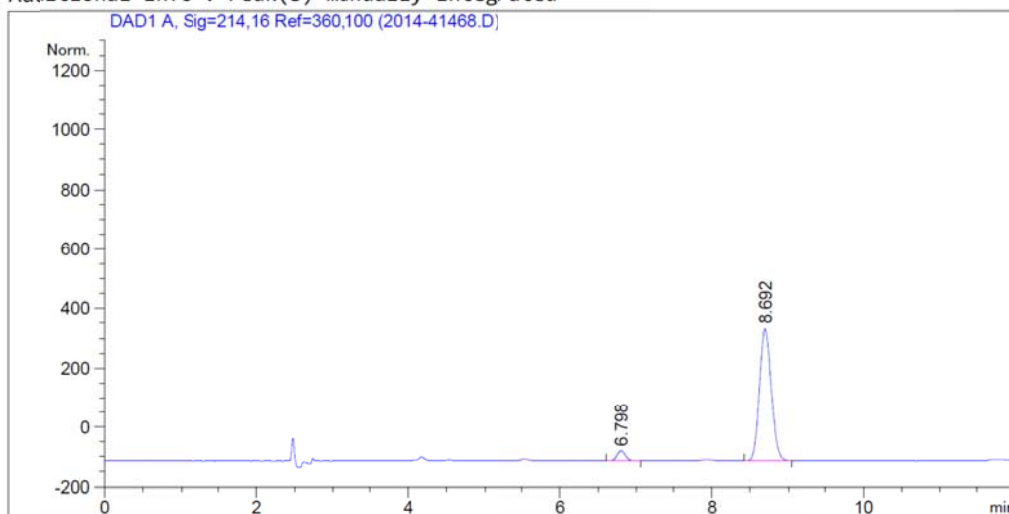

```

=====
                          Area Percent Report
=====
  
```

```

Sorted By      :      Signal
Multiplier     :      1.0000
Dilution       :      1.0000
Do not use Multiplier & Dilution Factor with ISTDs
  
```

Signal 1: DAD1 A, Sig=214,16 Ref=360,100

| Peak # | RetTime [min] | Type | Width [min] | Area [mAU*s] | Height [mAU] | Area %  |
|--------|---------------|------|-------------|--------------|--------------|---------|
| 1      | 6.798         | BB   | 0.1194      | 120.47047    | 15.54183     | 5.2092  |
| 2      | 8.692         | BB   | 0.1678      | 2192.16797   | 204.92938    | 94.7908 |

```
Totals :                      2312.63844  220.47121
```

**Supplementary Figure 47. HPLC spectrum for 9.**

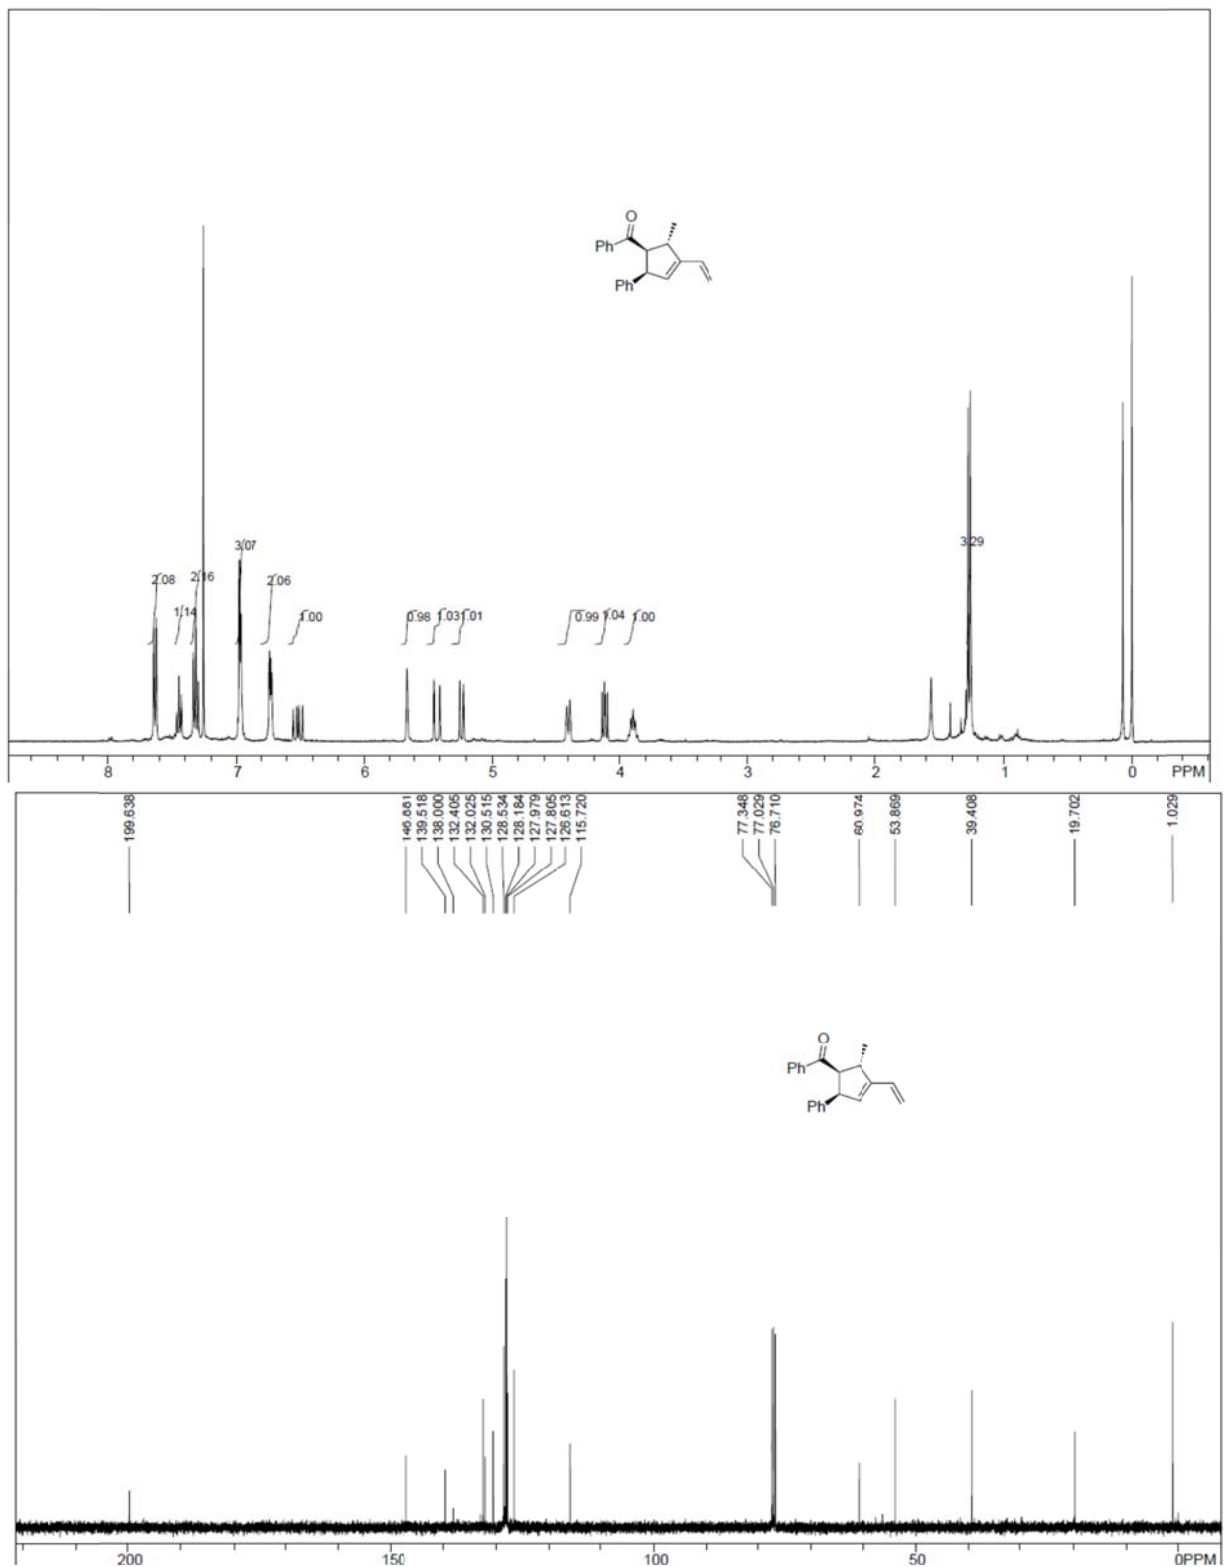

Supplementary Figure 48.  $^1\text{H}$  and  $^{13}\text{C}$  NMR spectrum for 10.





```

=====
Acq. Operator   : █████
Sample Operator : █████
Acq. Instrument : SFC                               Location : Vial 53
Injection Date  : 4/16/2015 4:06:46 PM
                                                    Inj Volume : 5.000 µl
Acq. Method     : C:\CHEM32\1\METHODS\AGILENT_SFC6.M
Last changed    : 4/16/2015 3:44:43 PM by █████
                  (modified after loading)
Analysis Method : C:\CHEM32\1\METHODS\AGILENT_SFC6.M
Last changed    : 4/16/2015 4:20:22 PM by █████
                  (modified after loading)
  
```

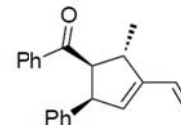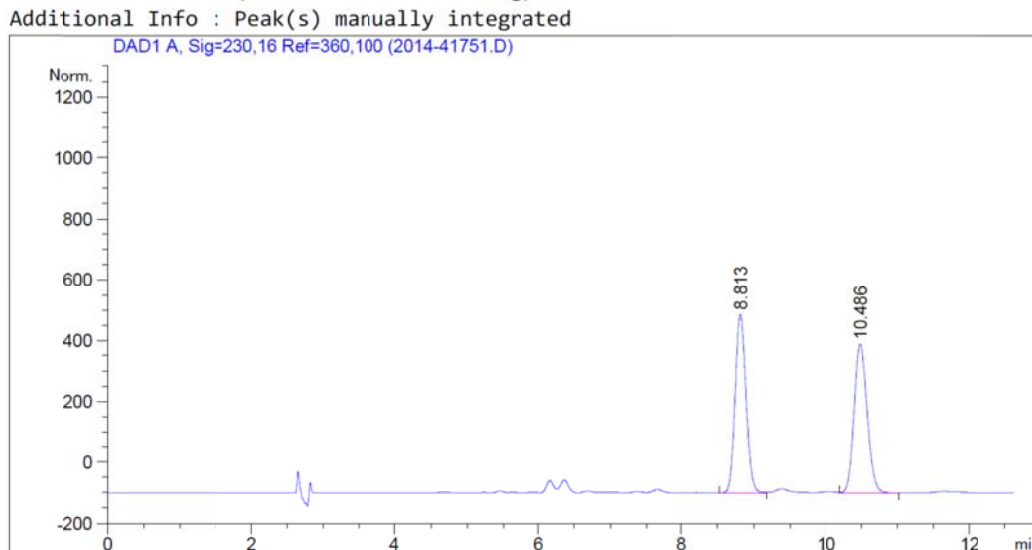

```

=====
                          Area Percent Report
=====
  
```

```

Sorted By      :      Signal
Multiplier     :      1.0000
Dilution       :      1.0000
Do not use Multiplier & Dilution Factor with ISTDs
  
```

Signal 1: DAD1 A, Sig=230,16 Ref=360,100

| Peak # | RetTime [min] | Type | Width [min] | Area [mAU*s] | Height [mAU] | Area %  |
|--------|---------------|------|-------------|--------------|--------------|---------|
| 1      | 8.813         | BV   | 0.1608      | 3785.69312   | 365.49261    | 49.8242 |
| 2      | 10.486        | VB   | 0.1939      | 3812.40625   | 304.91330    | 50.1758 |

Totals :                                    7598.09937   670.40591

**Supplementary Figure 51. HPLC spectrum for *rac*-10.**

```

=====
Acq. Operator   : ██████
Sample Operator : ██████
Acq. Instrument : SFC                               Location : Vial 81
Injection Date  : 4/16/2015 3:50:10 PM
                                                    Inj Volume : 5.000 µl

Acq. Method     : C:\CHEM32\1\METHODS\AGILENT_SFC6.M
Last changed    : 4/16/2015 3:44:43 PM by ██████
                  (modified after loading)

Analysis Method : C:\CHEM32\1\METHODS\AGILENT_SFC6.M
Last changed    : 4/16/2015 4:16:03 PM by ██████
                  (modified after loading)

Additional Info : Peak(s) manually integrated
  
```

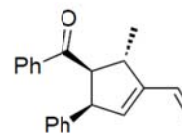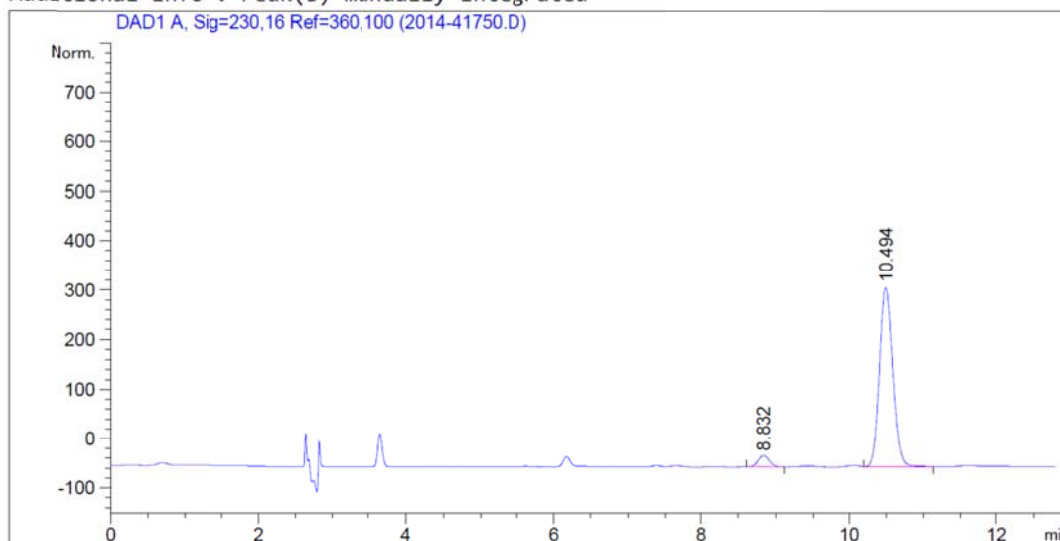

```

=====
                          Area Percent Report
=====
  
```

```

Sorted By      :      Signal
Multiplier     :      1.0000
Dilution       :      1.0000
Do not use Multiplier & Dilution Factor with ISTDs
  
```

Signal 1: DAD1 A, Sig=230,16 Ref=360,100

| Peak # | RetTime [min] | Type | Width [min] | Area [mAU*s] | Height [mAU] | Area %  |
|--------|---------------|------|-------------|--------------|--------------|---------|
| 1      | 8.832         | BB   | 0.1601      | 153.88518    | 15.07950     | 5.0652  |
| 2      | 10.494        | VB   | 0.1929      | 2884.20679   | 232.18825    | 94.9348 |

```
Totals :                      3038.09196  247.26775
```

```

=====
Supplementary Figure 52. HPLC spectrum for 10.
  
```

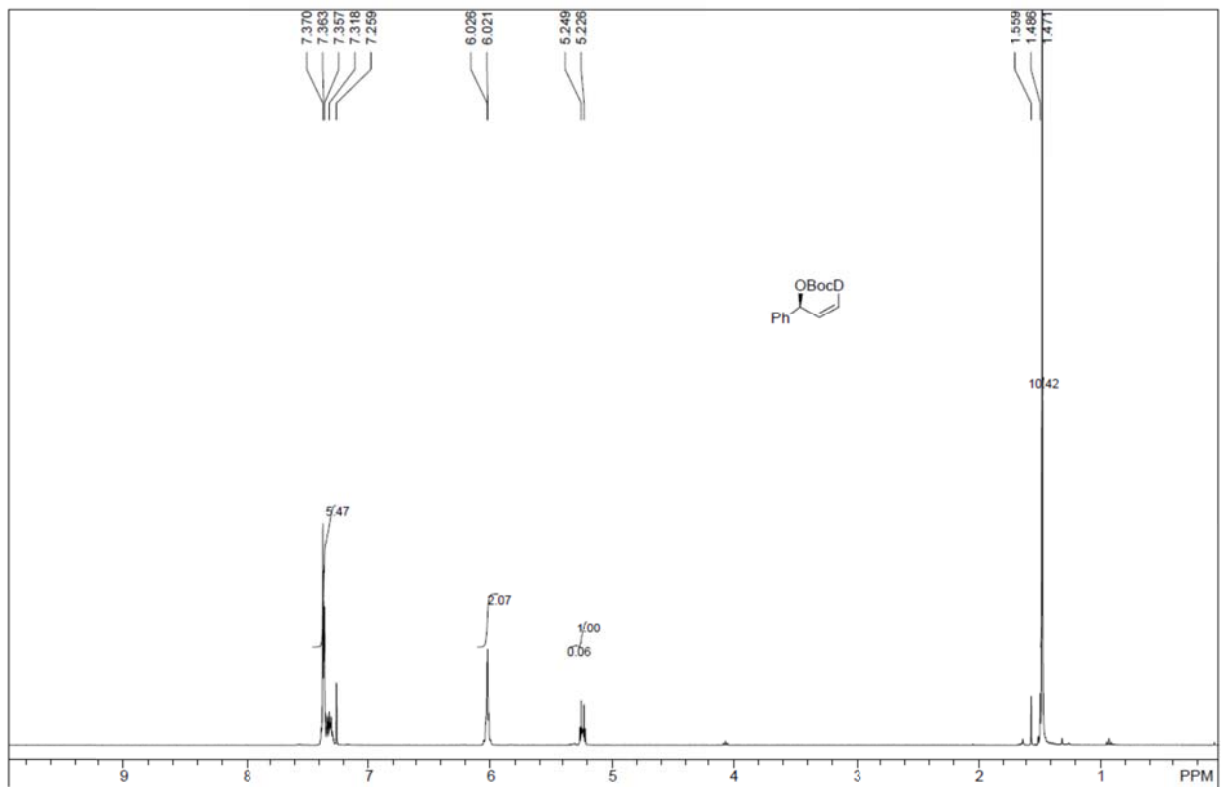

Supplementary Figure 53.  $^1\text{H}$  NMR spectrum for (S)-(Z)-5.

# ==== Shimadzu LCsolution Analysis Report ====

Acquired by : Admin  
 Sample Name : bdc-23-26-23s-RAC-  
 method : OJ-H, 95/5,0.7, 214  
 Injection Volume : 1 uL  
 Data File Name : bdc-23-26-23s-RAC-.lcd  
 Method File Name : 123.lcm  
 Report File Name : Default.lcr  
 Data Acquired : 2015-4-23 12:48:41  
 Data Processed : 2015-4-23 13:00:59

## <Chromatogram>

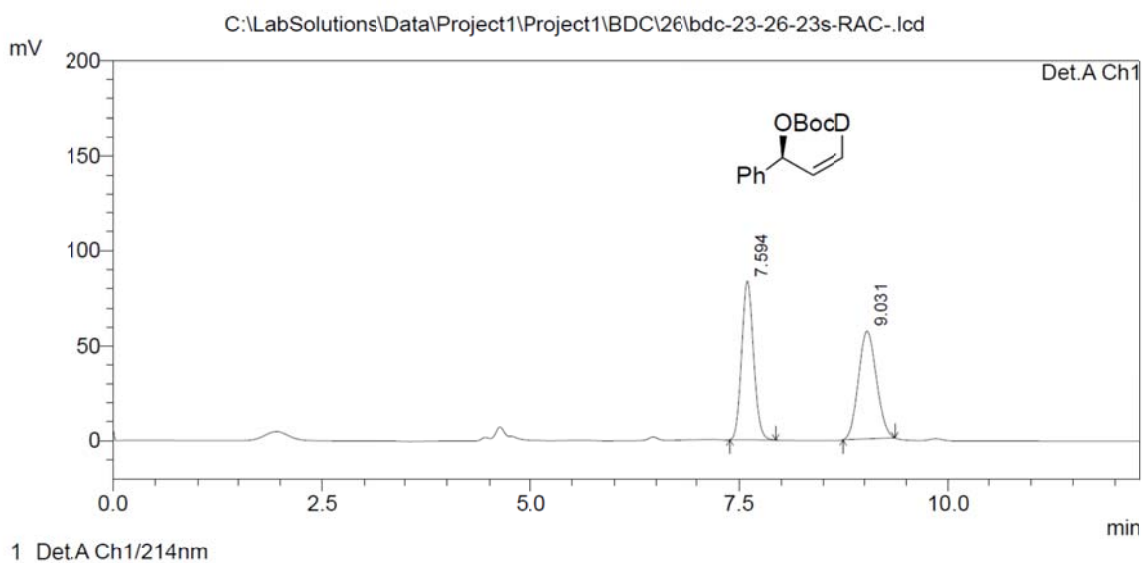

PeakTable

Detector A Ch1 214nm

| Peak# | Ret. Time | Area    | Height | Area %  |
|-------|-----------|---------|--------|---------|
| 1     | 7.594     | 819833  | 83681  | 49.144  |
| 2     | 9.031     | 848387  | 57004  | 50.856  |
| Total |           | 1668220 | 140685 | 100.000 |

Supplementary Figure 54. HPLC spectrum for *rac*-5.

# ==== Shimadzu LCsolution Analysis Report ====

Acquired by : Admin  
Sample Name : bdc-23-26-23s-  
method : OJ-H, 95/5,0.7, 214  
Injection Volume : 1 uL  
Data File Name : bdc-23-26-23s-.lcd  
Method File Name : 123.lcm  
Report File Name : Default.lcr  
Data Acquired : 2015-4-23 13:02:03  
Data Processed : 2015-4-23 13:18:21

## <Chromatogram>

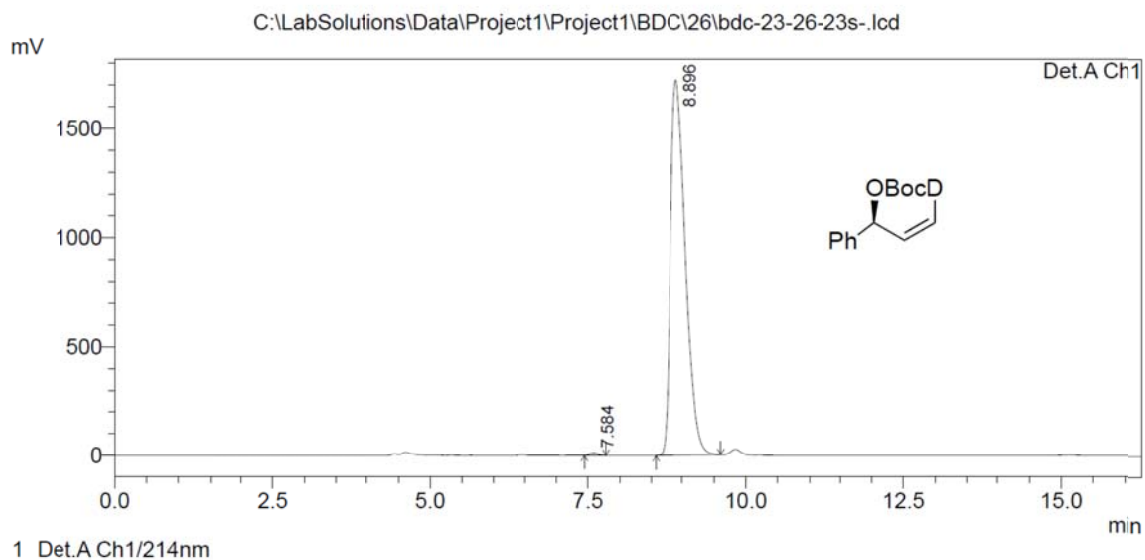

PeakTable

Detector A Ch1 214nm

| Peak# | Ret. Time | Area     | Height  | Area %  |
|-------|-----------|----------|---------|---------|
| 1     | 7.584     | 98562    | 10977   | 0.344   |
| 2     | 8.896     | 28532434 | 1721455 | 99.656  |
| Total |           | 28630996 | 1732432 | 100.000 |

Supplementary Figure 55. HPLC spectrum for (S)-(Z)-5.

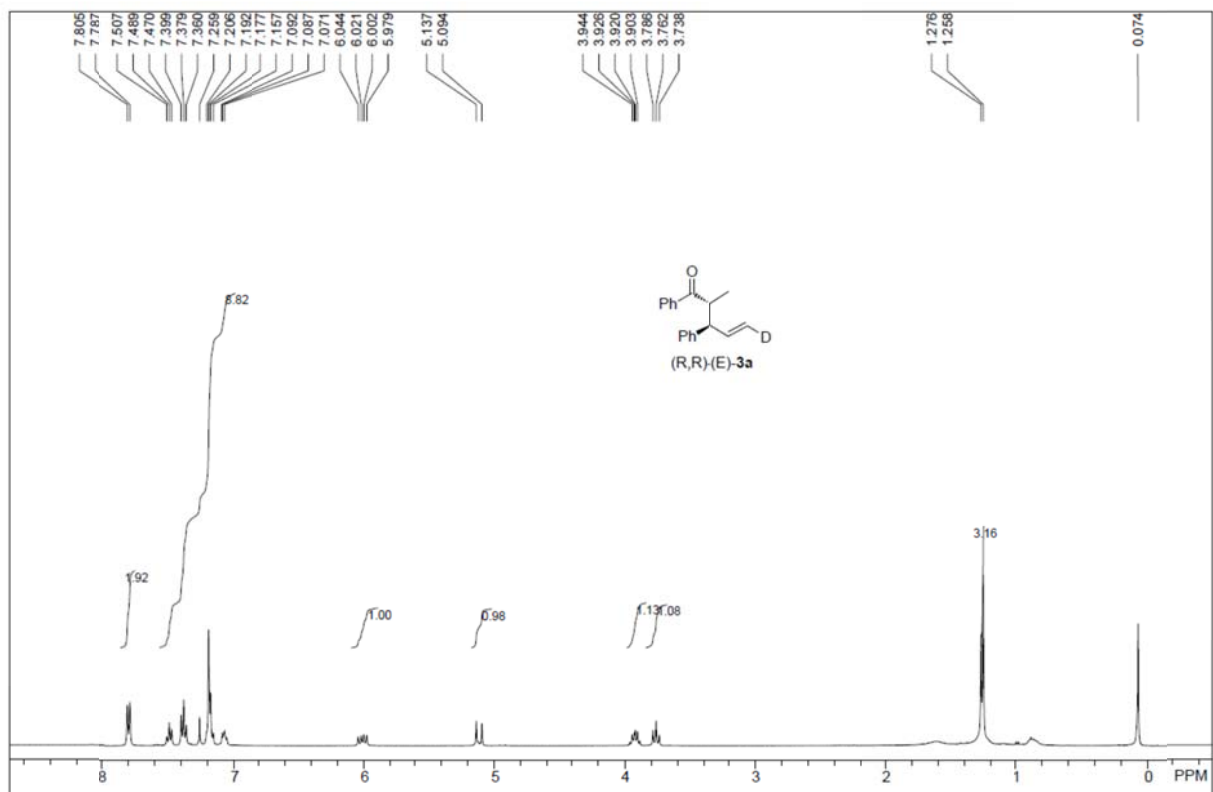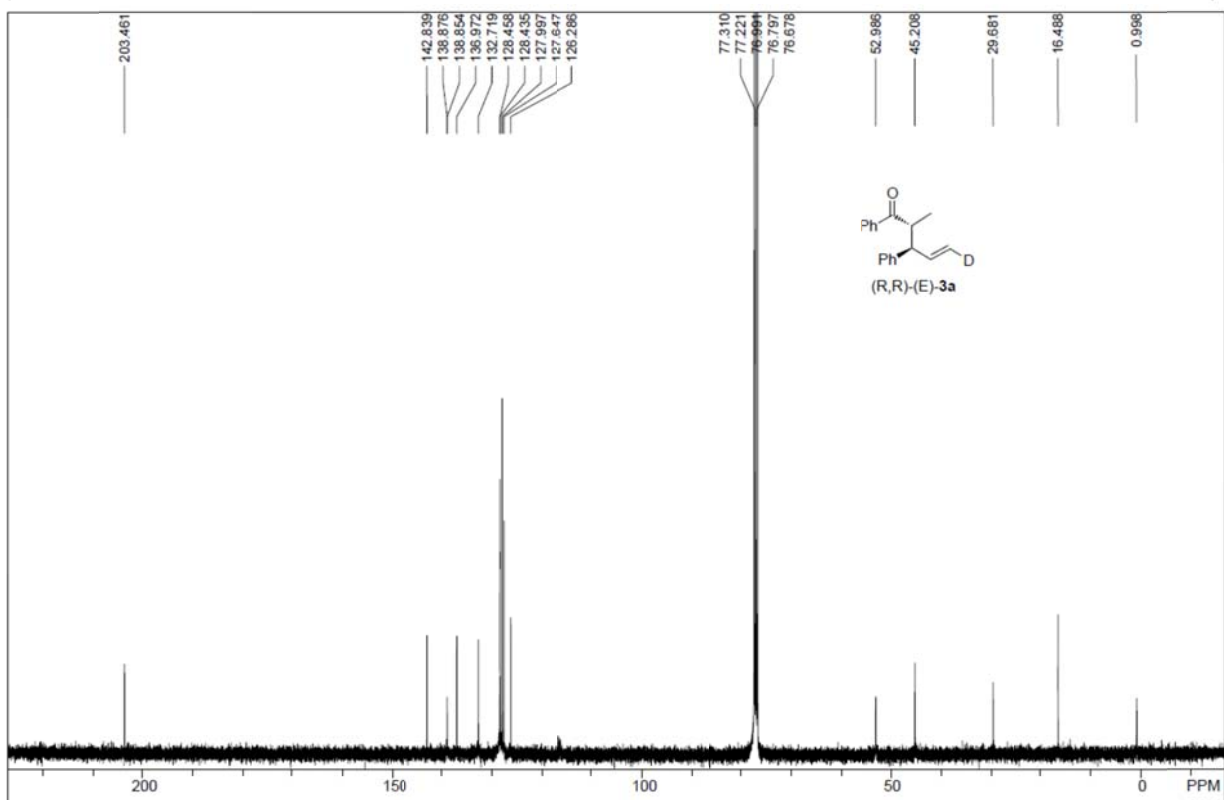

Supplementary Figure 56. <sup>1</sup>H and <sup>13</sup>C NMR spectrum for (R,R)-(E)-3a.

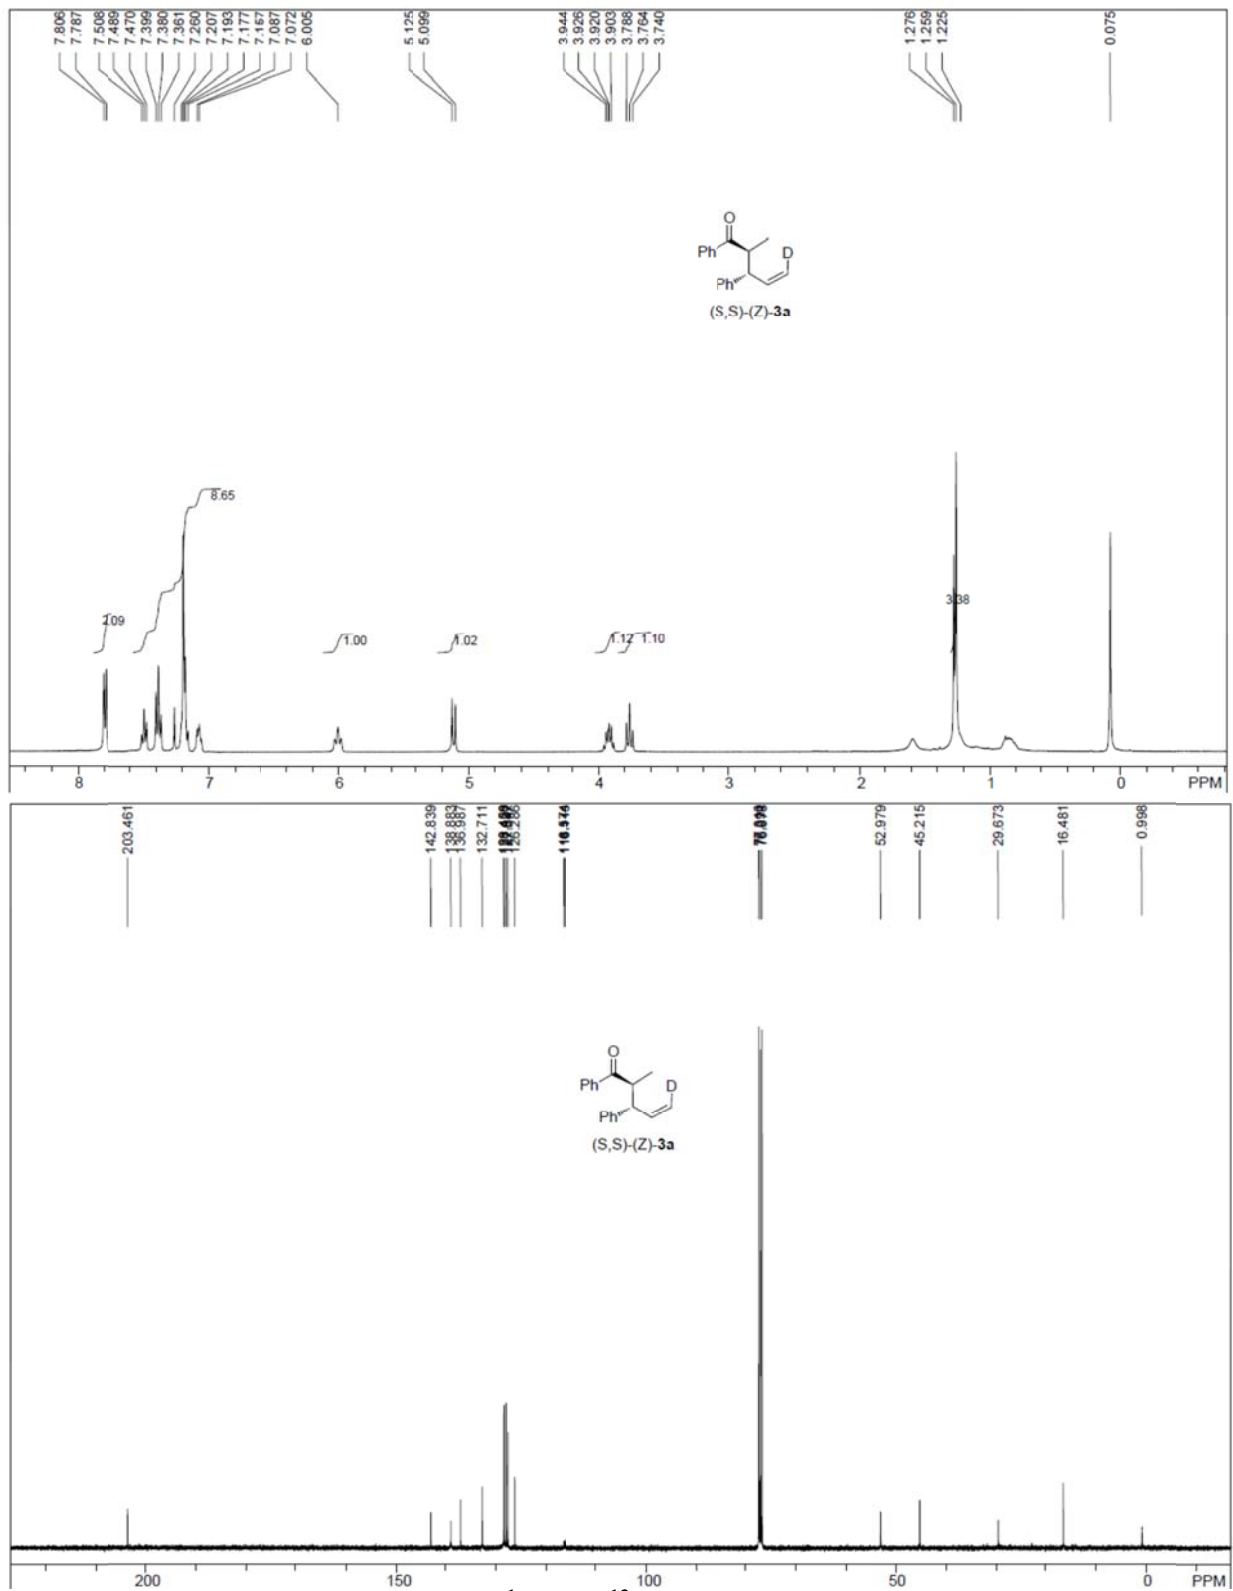

Supplementary Figure 57. <sup>1</sup>H and <sup>13</sup>C NMR spectrum for (S,S)-(Z)-3a.



# ==== Shimadzu LCsolution Analysis Report ====

Acquired by : Admin  
Sample Name : bdc-26-99d-rac  
method : oj-H,90/10,0.7,214  
Injection Volume : 1500 uL  
Data File Name : bdc-26-99d-rac.lcd  
Method File Name : 1234.lcm  
Report File Name : Default.lcr  
Data Acquired : 2014-6-8 20:28:52  
Data Processed : 2014-6-8 21:17:48

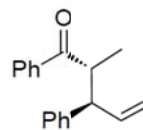

## <Chromatogram>

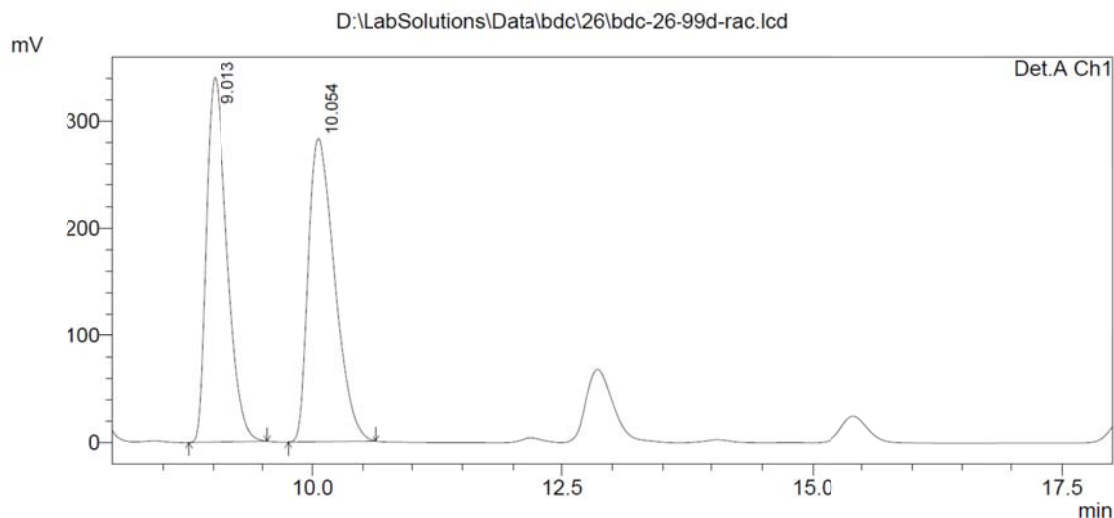

PeakTable

| Peak# | Ret. Time | Area     | Height | Area %  |
|-------|-----------|----------|--------|---------|
| 1     | 9.013     | 5056260  | 340225 | 49.508  |
| 2     | 10.054    | 5156726  | 283013 | 50.492  |
| Total |           | 10212986 | 623238 | 100.000 |

Supplementary Figure 58. HPLC spectrum for *rac*-3a.

# ==== Shimadzu LCsolution Analysis Report ====

D:\LabSolutions\Data\bdc\26\bdc-26-99d-1-hplc.lcd  
 Acquired by : Admin  
 Sample Name : bdc-26-99d-1  
 method : oj-H,90/10,0.7,214  
 Injection Volume : 1500 uL  
 Data File Name : bdc-26-99d-1-hplc.lcd  
 Method File Name : 1234.lcm  
 Report File Name : Default.lcr  
 Data Acquired : 2014-6-8 19:35:36  
 Data Processed : 2014-6-8 19:57:59

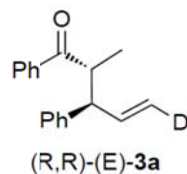

## <Chromatogram>

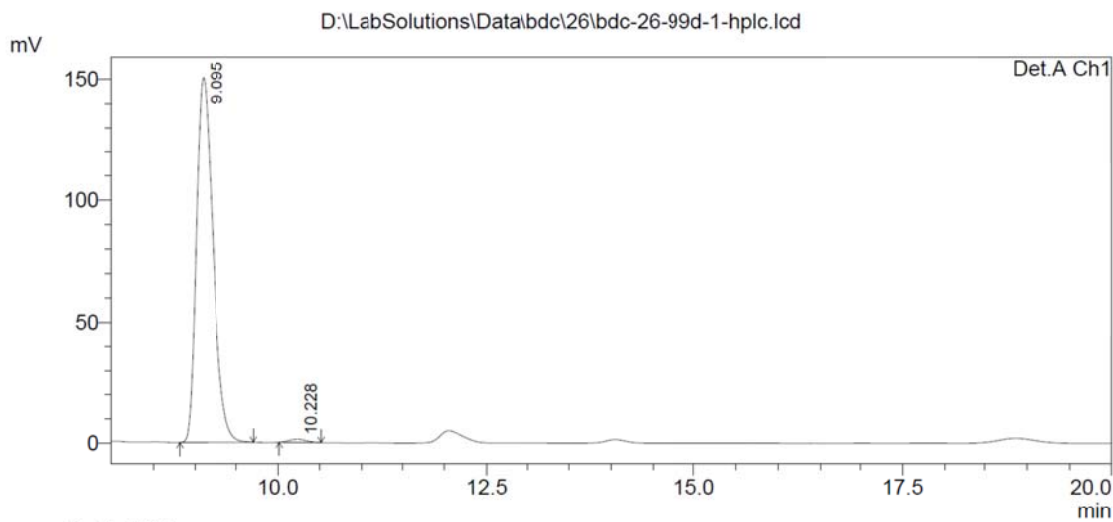

Detector A Ch1 214nm

PeakTable

| Peak# | Ret. Time | Area    | Height | Area %  |
|-------|-----------|---------|--------|---------|
| 1     | 9.095     | 2113957 | 150329 | 99.119  |
| 2     | 10.228    | 18786   | 1308   | 0.881   |
| Total |           | 2132743 | 151637 | 100.000 |

Supplementary Figure 59. HPLC spectrum for (R,R)-(E)-3a.

# ==== Shimadzu LCsolution Analysis Report ====

Acquired by : Admin  
Sample Name : bdc-26-99d-2-hplc  
method : oj-H,90/10,0.7,214  
Injection Volume : 1500 uL  
Data File Name : bdc-26-99d-2-hplc.lcd  
Method File Name : 1234.lcm  
Report File Name : Default.lcr  
Data Acquired : 2014-6-8 20:00:38  
Data Processed : 2014-6-8 20:25:50

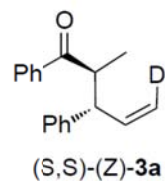

## <Chromatogram>

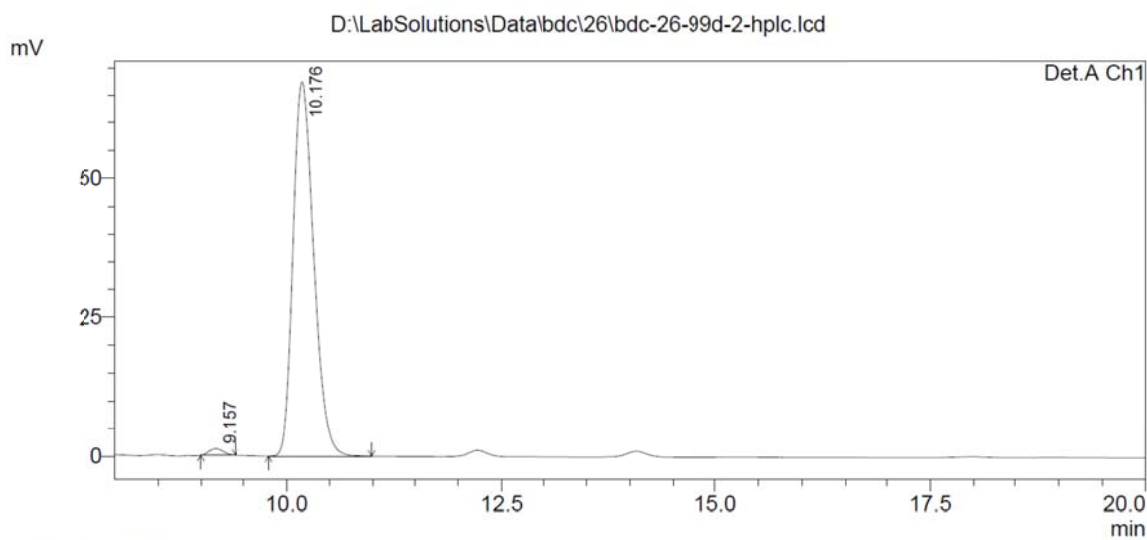

1 Det.A Ch1/214nm

PeakTable

| Peak# | Ret. Time | Area    | Height | Area %  |
|-------|-----------|---------|--------|---------|
| 1     | 9.157     | 13722   | 1192   | 1.206   |
| 2     | 10.176    | 1124023 | 67464  | 98.794  |
| Total |           | 1137745 | 68656  | 100.000 |

Supplementary Figure 60. HPLC spectrum for (S,S)-(Z)-3a.

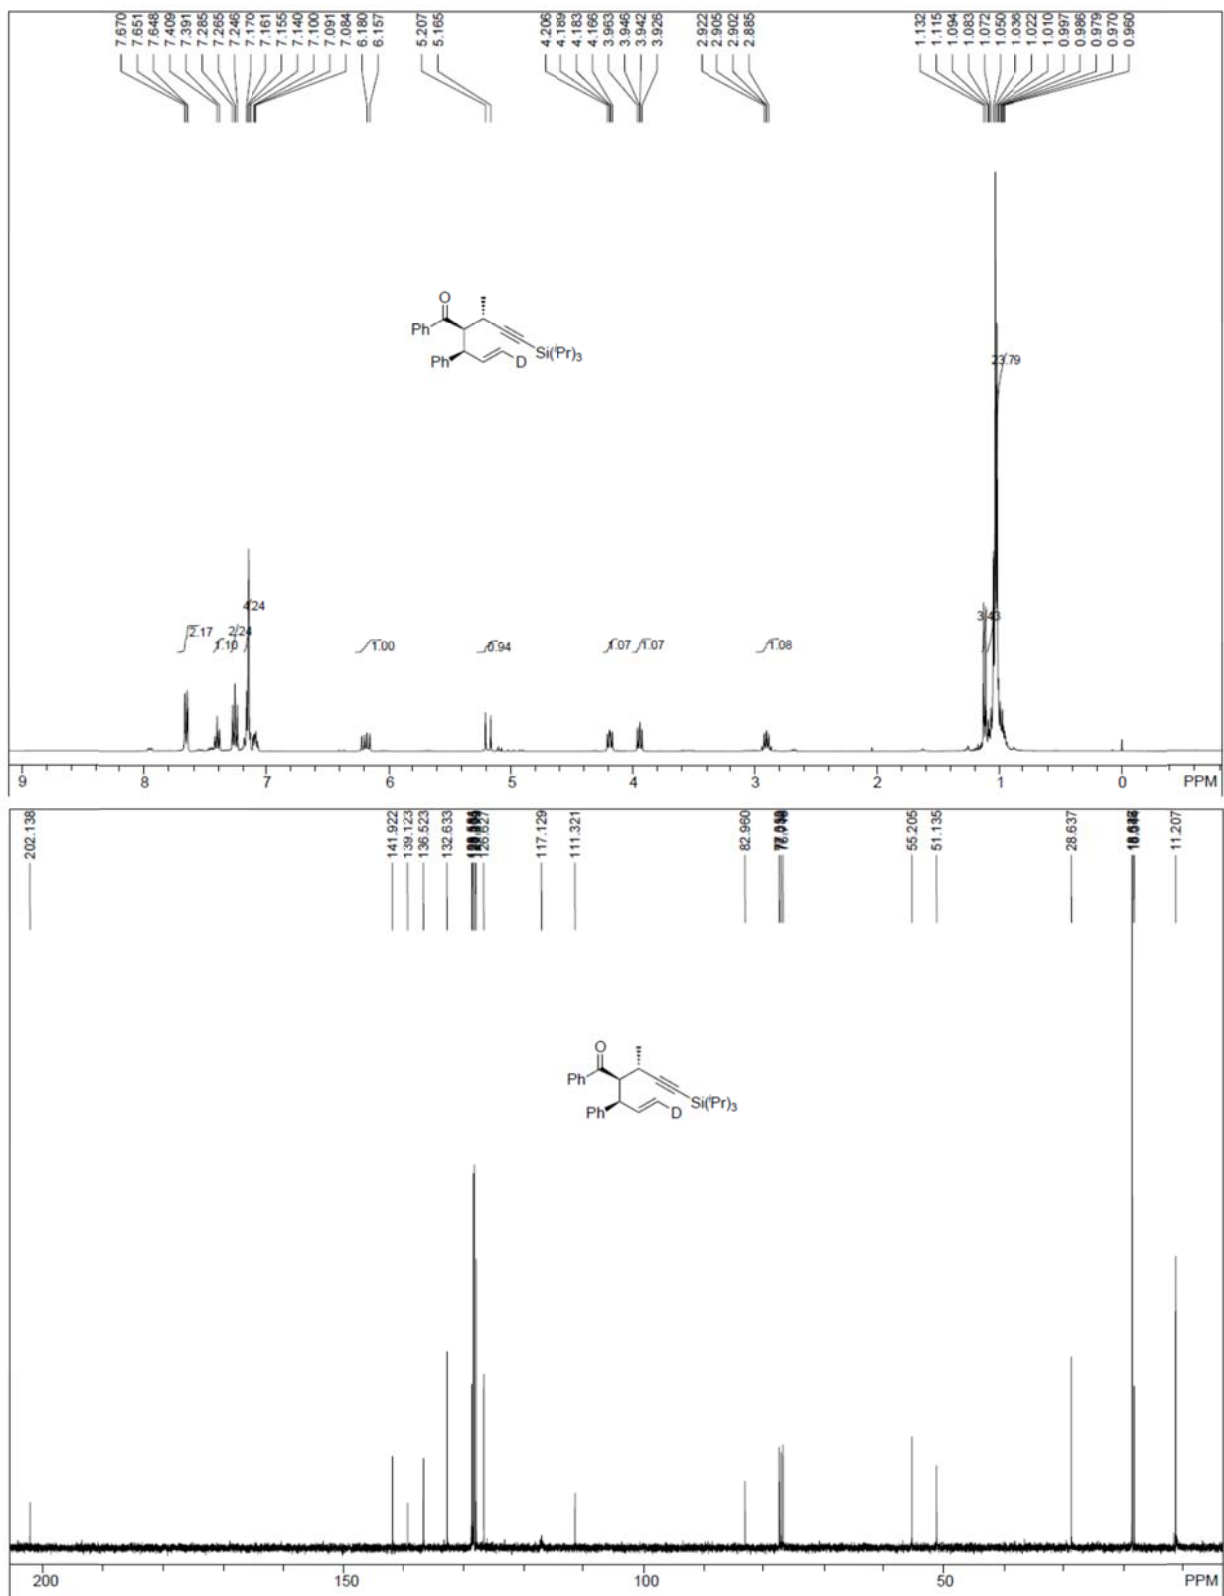

Supplementary Figure 61. <sup>1</sup>H and <sup>13</sup>C NMR spectrum for (3R,4S,5S)-(E)-31.

=====  
 Acq. Operator : ██████  
 Sample Operator : ██████  
 Acq. Instrument : SFC Location : Vial 72  
 Injection Date : 4/24/2015 11:11:14 AM

Inj Volume : 5.000 µl

Acq. Method : C:\CHEM32\1\METHODS\AGILENT\_SFC6.M  
 Last changed : 4/24/2015 10:37:15 AM by ██████  
 (modified after loading)  
 Analysis Method : C:\CHEM32\1\METHODS\AGILENT\_SFC6.M  
 Last changed : 4/28/2015 2:28:48 PM by ██████  
 (modified after loading)

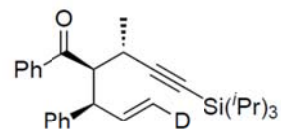

Additional Info : Peak(s) manually integrated

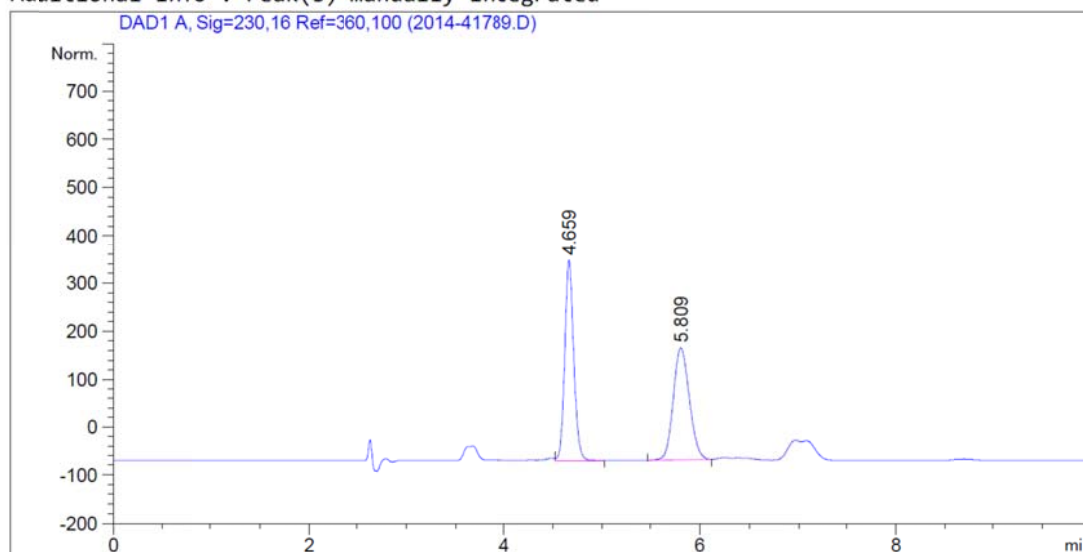

=====  
 Area Percent Report  
 =====

Sorted By : Signal  
 Multiplier : 1.0000  
 Dilution : 1.0000  
 Do not use Multiplier & Dilution Factor with ISTDs

Signal 1: DAD1 A, Sig=230,16 Ref=360,100

| Peak # | RetTime [min] | Type | Width [min] | Area [mAU*s] | Height [mAU] | Area %  |
|--------|---------------|------|-------------|--------------|--------------|---------|
| 1      | 4.659         | VB   | 0.0956      | 1697.59399   | 269.25052    | 50.0299 |
| 2      | 5.809         | BB   | 0.1750      | 1695.56311   | 151.01114    | 49.9701 |

Totals : 3393.15710 420.26166

**Supplementary Figure 62. HPLC spectrum for *rac*-(*E*)-3l.**

```

=====
Acq. Operator   : ██████
Sample Operator : ██████
Acq. Instrument : SFC                               Location : Vial 73
Injection Date  : 4/24/2015 10:57:13 AM           Inj Volume : 5.000 µl
Acq. Method     : C:\CHEM32\1\METHODS\AGILENT_SFC6.M
Last changed    : 4/24/2015 10:37:15 AM by ██████
                  (modified after loading)
Analysis Method : C:\CHEM32\1\METHODS\AGILENT_SFC6.M
Last changed    : 4/28/2015 2:30:48 PM by ██████
                  (modified after loading)
Additional Info  : Peak(s) manually integrated
  
```

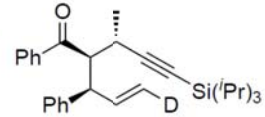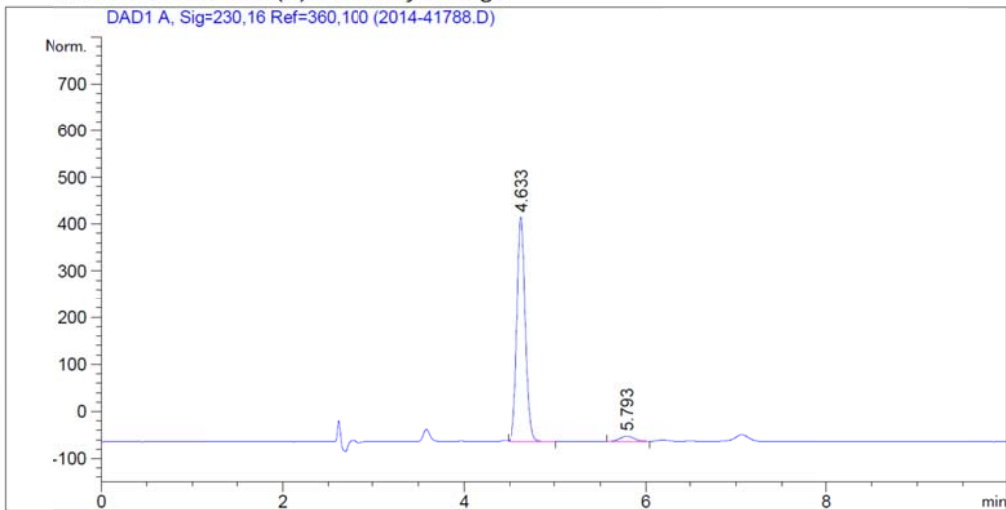

```

=====
                          Area Percent Report
=====
  
```

```

Sorted By      :      Signal
Multiplier     :      1.0000
Dilution       :      1.0000
Do not use Multiplier & Dilution Factor with ISTDs
  
```

Signal 1: DAD1 A, Sig=230,16 Ref=360,100

| Peak # | RetTime [min] | Type | Width [min] | Area [mAU*s] | Height [mAU] | Area %  |
|--------|---------------|------|-------------|--------------|--------------|---------|
| 1      | 4.633         | VB   | 0.0994      | 2226.16846   | 344.66232    | 96.1309 |
| 2      | 5.793         | BB   | 0.1727      | 89.59998     | 8.05881      | 3.8691  |

```
Totals :                2315.76843  352.72113
```

**Supplementary Figure 63. HPLC spectrum for (3R,4S,5S)-(E)-3l.**

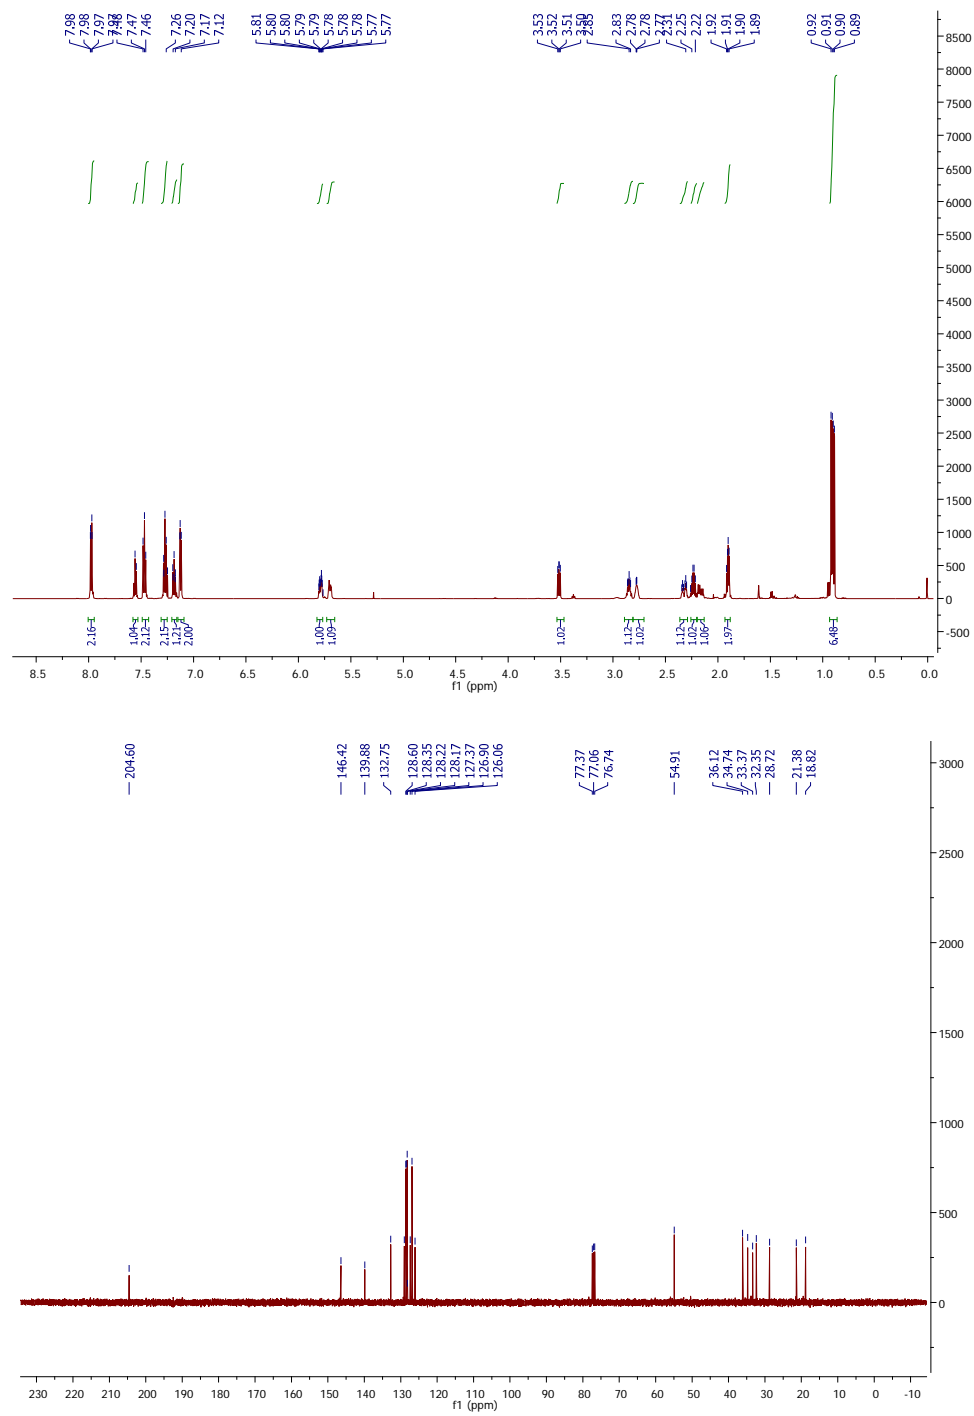

Supplementary Figure 64. <sup>1</sup>H and <sup>13</sup>C NMR spectrum for 12.

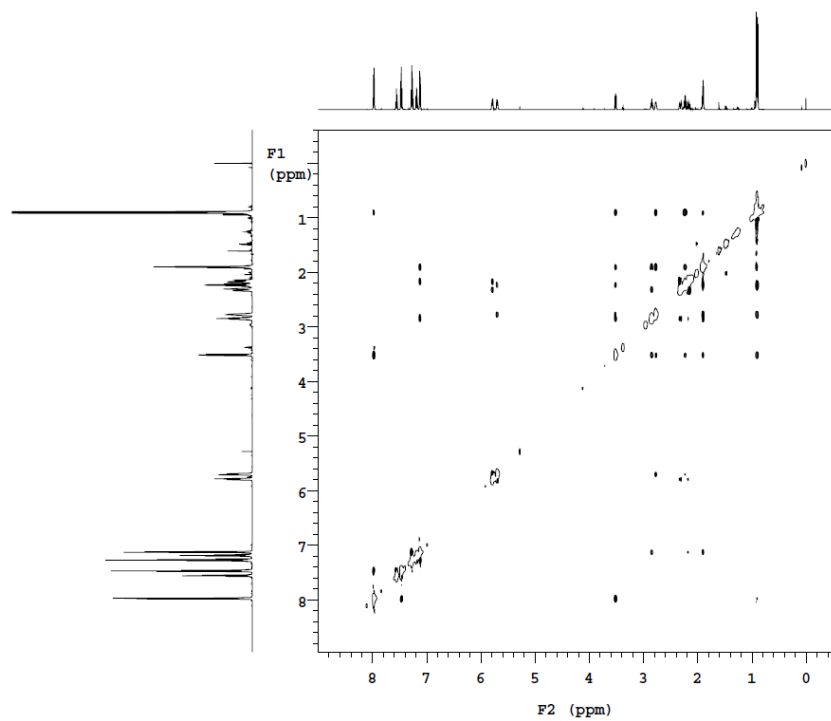

**Supplementary Figure 65. NOESY spectrum for 12.**

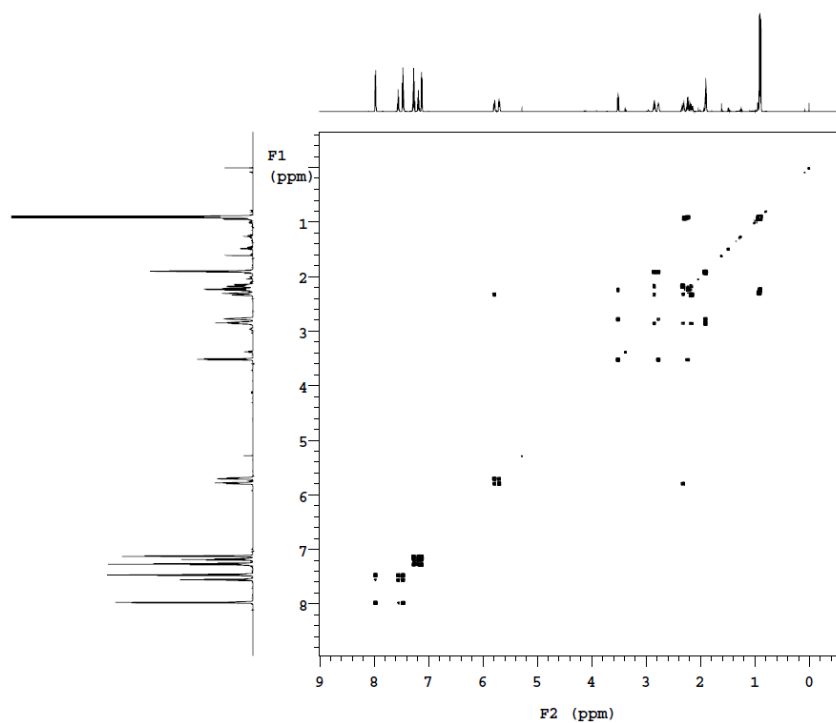

**Supplementary Figure 66. gCOSY spectrum for 12.**



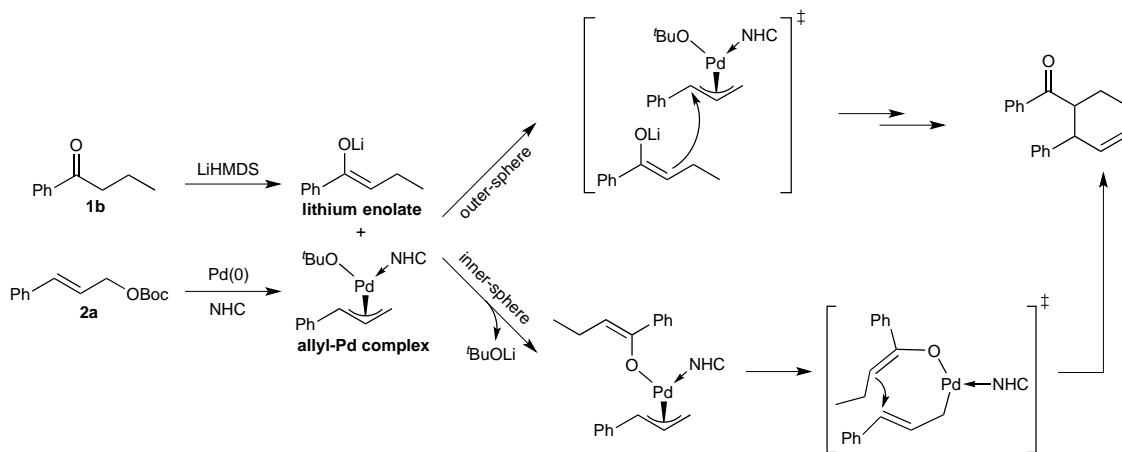

**Supplementary Figure 67.** The proposed process of reaction of **1b** with **2a** in the presence of base, Pd and ligand, leading to the branched product.

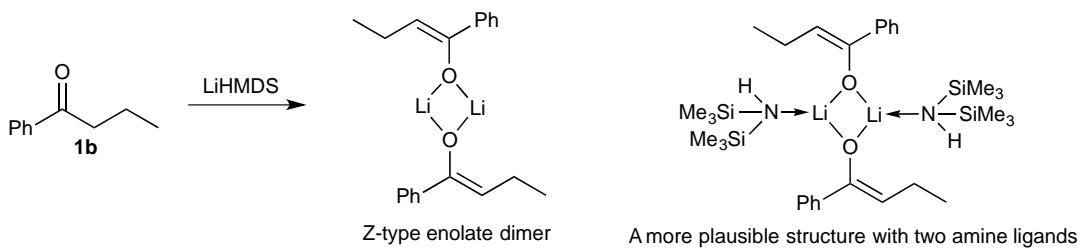

**Supplementary Figure 68.** Proposed dimer structure of the lithium enolates, generated from **1b** by LiHMDS.

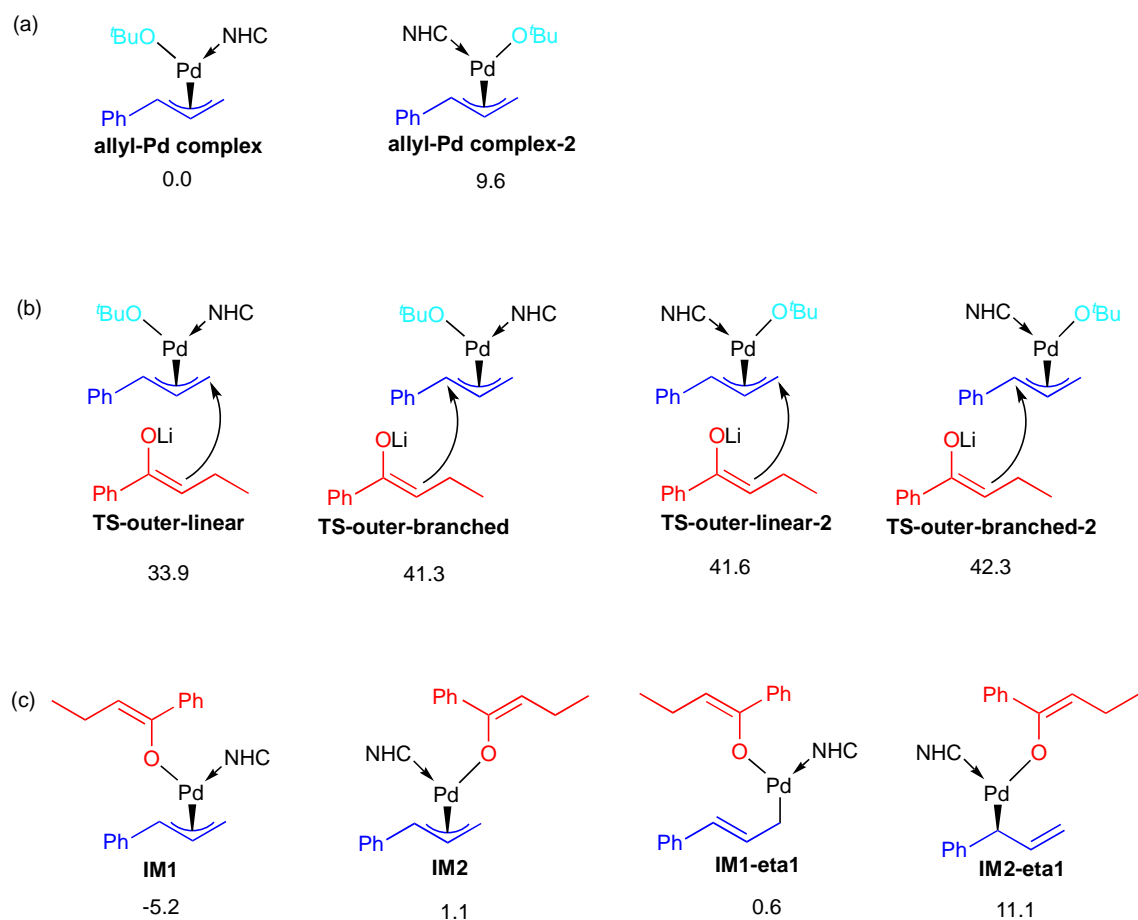

**Supplementary Figure 69.** Calculated relative free energies (in kcal/mol) of (a) Two configurations of the *allyl-Pd complex*; (b) four transition states of the outer-sphere pathways (linear and branched for each of *allyl-Pd complex-1* and *allyl-Pd complex-2*); (c) four  $\eta^1$ -allyl-Pd complex intermediates in the inner-sphere pathways.

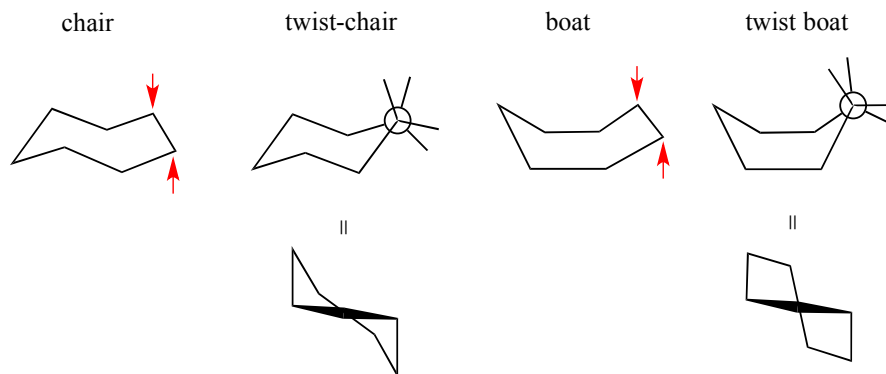

**Supplementary Figure 70.** Conformations of cycloheptane.

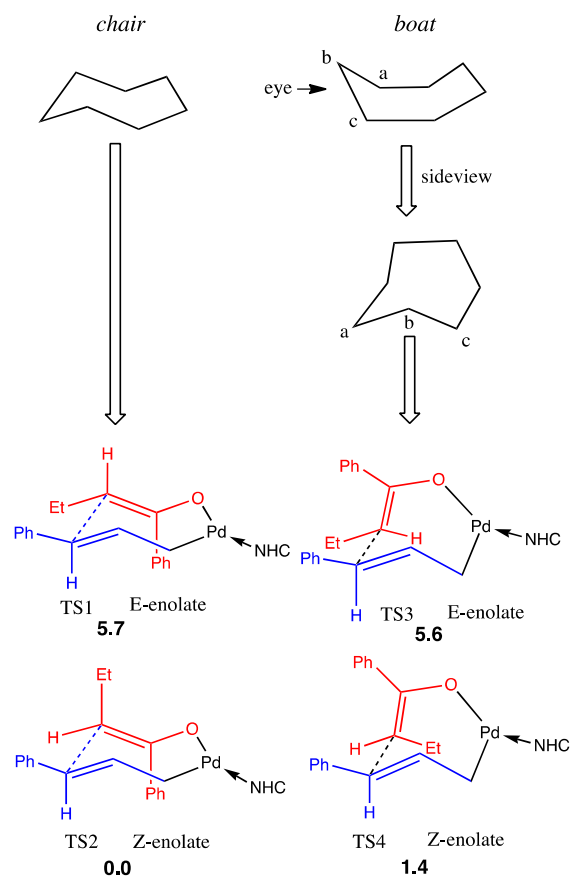

**Supplementary Figure 71.** Construction of transition state structures (TS-inner-branched) for substrate **1b** from cycloheptane. The number at the bottom of each transition state structure show its energy ( $\Delta G_{sol}$  in kcal/mol) relative to **TS2**.

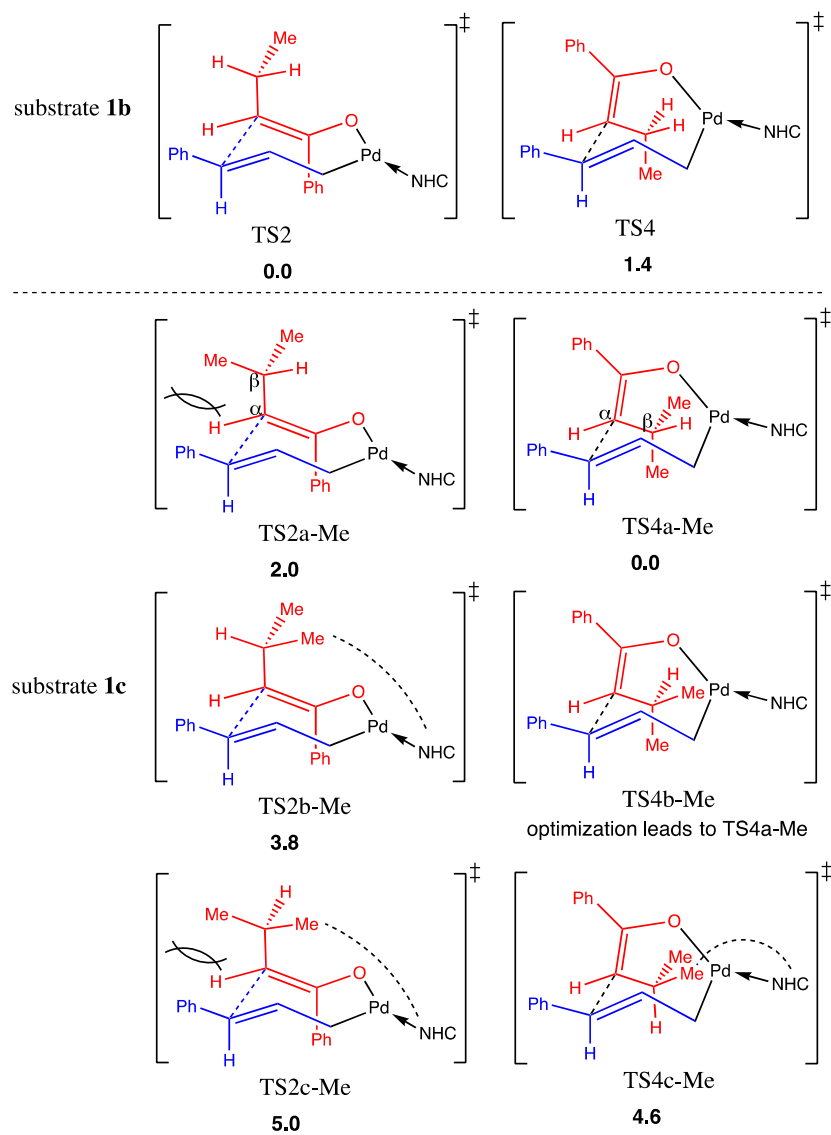

**Supplementary Figure 72.** Calculated energies of transition state structures for **1b** and **1c**. The number at the bottom of each transition state structure show its energy  $\Delta G_{sol}$  (in kcal/mol).

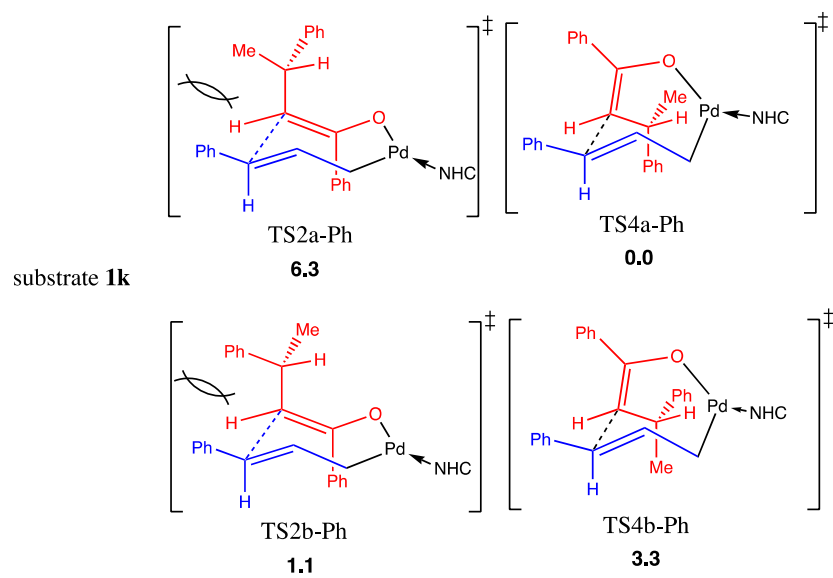

**Supplementary Figure 73.** Calculated energies of transition state structures for **1k**. The number at the bottom of each transition state structure show its energy ( $\Delta G_{sol}$  in kcal/mol)

## Supplementary Tables

### Supplementary Table 1. ORTEP Diagram of 3c.

|                                   |                                             |                       |
|-----------------------------------|---------------------------------------------|-----------------------|
| Identification code               | <b>3c</b>                                   |                       |
| Empirical formula                 | C <sub>21</sub> H <sub>24</sub> O           |                       |
| Formula weight                    | 292.40                                      |                       |
| Temperature                       | 293(2) K                                    |                       |
| Wavelength                        | 0.71073 Å                                   |                       |
| Crystal system                    | Orthorhombic                                |                       |
| Space group                       | P b c a                                     |                       |
| Unit cell dimensions              | a = 7.3682(5) Å                             | $\alpha = 90^\circ$ . |
|                                   | b = 11.4357(8) Å                            | $\beta = 90^\circ$ .  |
|                                   | c = 41.662(3) Å                             | $\gamma = 90^\circ$ . |
| Volume                            | 3510.5(4) Å <sup>3</sup>                    |                       |
| Z                                 | 8                                           |                       |
| Density (calculated)              | 1.106 Mg/m <sup>3</sup>                     |                       |
| Absorption coefficient            | 0.066 mm <sup>-1</sup>                      |                       |
| F(000)                            | 1264                                        |                       |
| Crystal size                      | 0.188 x 0.145 x 0.113 mm <sup>3</sup>       |                       |
| Theta range for data collection   | 1.955 to 25.498°.                           |                       |
| Index ranges                      | -8 ≤ h ≤ 7, -13 ≤ k ≤ 13, -42 ≤ l ≤ 50      |                       |
| Reflections collected             | 19148                                       |                       |
| Independent reflections           | 3262 [R(int) = 0.0729]                      |                       |
| Completeness to theta = 25.242°   | 100.0 %                                     |                       |
| Absorption correction             | Semi-empirical from equivalents             |                       |
| Max. and min. transmission        | 0.7457 and 0.6260                           |                       |
| Refinement method                 | Full-matrix least-squares on F <sup>2</sup> |                       |
| Data / restraints / parameters    | 3262 / 28 / 223                             |                       |
| Goodness-of-fit on F <sup>2</sup> | 1.021                                       |                       |
| Final R indices [I > 2σ(I)]       | R1 = 0.0633, wR2 = 0.1666                   |                       |
| R indices (all data)              | R1 = 0.1250, wR2 = 0.1965                   |                       |
| Extinction coefficient            | n/a                                         |                       |
| Largest diff. peak and hole       | 0.170 and -0.175 e.Å <sup>-3</sup>          |                       |

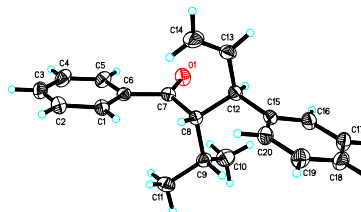

## Supplementary Table 2. ORTEP Diagram of 3f.

|                                   |                                             |                              |
|-----------------------------------|---------------------------------------------|------------------------------|
| Identification code               | <b>3f</b>                                   |                              |
| Empirical formula                 | C <sub>25</sub> H <sub>24</sub> O           |                              |
| Formula weight                    | 340.44                                      |                              |
| Temperature                       | 293(2) K                                    |                              |
| Wavelength                        | 0.71073 Å                                   |                              |
| Crystal system                    | Triclinic                                   |                              |
| Space group                       | P -1                                        |                              |
| Unit cell dimensions              | a = 8.0107(13) Å                            | $\alpha = 90.066(4)^\circ$ . |
|                                   | b = 11.3987(18) Å                           | $\beta = 97.728(4)^\circ$ .  |
|                                   | c = 21.671(3) Å                             | $\gamma = 91.878(4)^\circ$ . |
| Volume                            | 1959.8(5) Å <sup>3</sup>                    |                              |
| Z                                 | 4                                           |                              |
| Density (calculated)              | 1.154 Mg/m <sup>3</sup>                     |                              |
| Absorption coefficient            | 0.068 mm <sup>-1</sup>                      |                              |
| F(000)                            | 728                                         |                              |
| Crystal size                      | 0.211 x 0.156 x 0.121 mm <sup>3</sup>       |                              |
| Theta range for data collection   | 1.897 to 25.050°.                           |                              |
| Index ranges                      | -9<=h<=9, -13<=k<=13, -23<=l<=25            |                              |
| Reflections collected             | 11038                                       |                              |
| Independent reflections           | 6946 [R(int) = 0.0389]                      |                              |
| Completeness to theta = 25.242°   | 97.9 %                                      |                              |
| Absorption correction             | Semi-empirical from equivalents             |                              |
| Max. and min. transmission        | 0.7457 and 0.5494                           |                              |
| Refinement method                 | Full-matrix least-squares on F <sup>2</sup> |                              |
| Data / restraints / parameters    | 6946 / 62 / 502                             |                              |
| Goodness-of-fit on F <sup>2</sup> | 1.039                                       |                              |
| Final R indices [I>2sigma(I)]     | R1 = 0.0838, wR2 = 0.2398                   |                              |
| R indices (all data)              | R1 = 0.1705, wR2 = 0.2985                   |                              |
| Extinction coefficient            | n/a                                         |                              |
| Largest diff. peak and hole       | 0.666 and -0.428 e.Å <sup>-3</sup>          |                              |

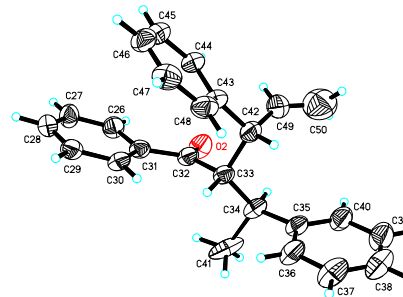

### Supplementary Table 3. ORTEP Diagram of 7.

|                                   |                                                |          |
|-----------------------------------|------------------------------------------------|----------|
| Identification code               | 7                                              |          |
| Empirical formula                 | C <sub>28</sub> H <sub>32</sub> O <sub>2</sub> |          |
| Formula weight                    | 400.53                                         |          |
| Temperature                       | 293(2) K                                       |          |
| Wavelength                        | 0.71073 Å                                      |          |
| Crystal system                    | Orthorhombic                                   |          |
| Space group                       | P 21 21 21                                     |          |
| Unit cell dimensions              | a = 6.6085(6) Å                                | α = 90°. |
|                                   | b = 10.5975(10) Å                              | β = 90°. |
|                                   | c = 31.771(3) Å                                | γ = 90°. |
| Volume                            | 2225.0(4) Å <sup>3</sup>                       |          |
| Z                                 | 4                                              |          |
| Density (calculated)              | 1.196 Mg/m <sup>3</sup>                        |          |
| Absorption coefficient            | 0.073 mm <sup>-1</sup>                         |          |
| F(000)                            | 864                                            |          |
| Crystal size                      | 0.211 x 0.165 x 0.123 mm <sup>3</sup>          |          |
| Theta range for data collection   | 2.026 to 25.999°.                              |          |
| Index ranges                      | -8 ≤ h ≤ 8, -13 ≤ k ≤ 12, -39 ≤ l ≤ 34         |          |
| Reflections collected             | 13581                                          |          |
| Independent reflections           | 4357 [R(int) = 0.0372]                         |          |
| Completeness to theta = 25.242°   | 100.0 %                                        |          |
| Absorption correction             | Semi-empirical from equivalents                |          |
| Max. and min. transmission        | 0.7457 and 0.6397                              |          |
| Refinement method                 | Full-matrix least-squares on F <sup>2</sup>    |          |
| Data / restraints / parameters    | 4357 / 0 / 274                                 |          |
| Goodness-of-fit on F <sup>2</sup> | 0.991                                          |          |
| Final R indices [I > 2σ(I)]       | R1 = 0.0438, wR2 = 0.1117                      |          |
| R indices (all data)              | R1 = 0.0641, wR2 = 0.1235                      |          |
| Absolute structure parameter      | -1.6(9)                                        |          |
| Largest diff. peak and hole       | 0.150 and -0.137 e.Å <sup>-3</sup>             |          |

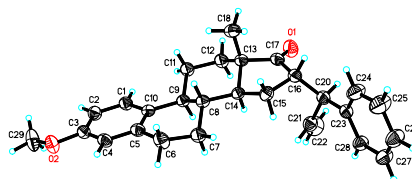



### Supplementary Table 4. ORTEP Diagram of 8.

|                                   |                                                |                   |
|-----------------------------------|------------------------------------------------|-------------------|
| Identification code               | <b>8</b>                                       |                   |
| Empirical formula                 | C <sub>26</sub> H <sub>28</sub> O <sub>2</sub> |                   |
| Formula weight                    | 372.48                                         |                   |
| Temperature                       | 130 K                                          |                   |
| Wavelength                        | 0.71073 Å                                      |                   |
| Crystal system                    | Monoclinic                                     |                   |
| Space group                       | P 1 21/c 1                                     |                   |
| Unit cell dimensions              | a = 12.7892(10) Å                              | α = 90°.          |
|                                   | b = 7.8407(6) Å                                | β = 98.8890(10)°. |
|                                   | c = 20.1647(16) Å                              | γ = 90°.          |
| Volume                            | 1997.8(3) Å <sup>3</sup>                       |                   |
| Z                                 | 4                                              |                   |
| Density (calculated)              | 1.238 Mg/m <sup>3</sup>                        |                   |
| Absorption coefficient            | 0.076 mm <sup>-1</sup>                         |                   |
| F(000)                            | 800                                            |                   |
| Crystal size                      | 0.25 x 0.2 x 0.15 mm <sup>3</sup>              |                   |
| Theta range for data collection   | 2.044 to 30.504°.                              |                   |
| Index ranges                      | -18 ≤ h ≤ 18, -10 ≤ k ≤ 11, -28 ≤ l ≤ 26       |                   |
| Reflections collected             | 19526                                          |                   |
| Independent reflections           | 6076 [R(int) = 0.0275]                         |                   |
| Completeness to theta = 26.000°   | 99.9 %                                         |                   |
| Absorption correction             | Semi-empirical from equivalents                |                   |
| Max. and min. transmission        | 0.7461 and 0.6898                              |                   |
| Refinement method                 | Full-matrix least-squares on F <sup>2</sup>    |                   |
| Data / restraints / parameters    | 6076 / 0 / 255                                 |                   |
| Goodness-of-fit on F <sup>2</sup> | 1.024                                          |                   |
| Final R indices [I > 2σ(I)]       | R1 = 0.0448, wR2 = 0.1116                      |                   |
| R indices (all data)              | R1 = 0.0597, wR2 = 0.1217                      |                   |
| Extinction coefficient            | n/a                                            |                   |
| Largest diff. peak and hole       | 0.396 and -0.243 e.Å <sup>-3</sup>             |                   |

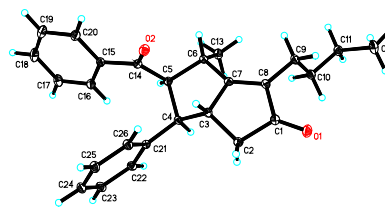

**Supplementary Table 5. Optimization of the reaction conditions of Pd-catalyzed allylic alkylation reaction of ketone 1c<sup>[a]</sup>.**

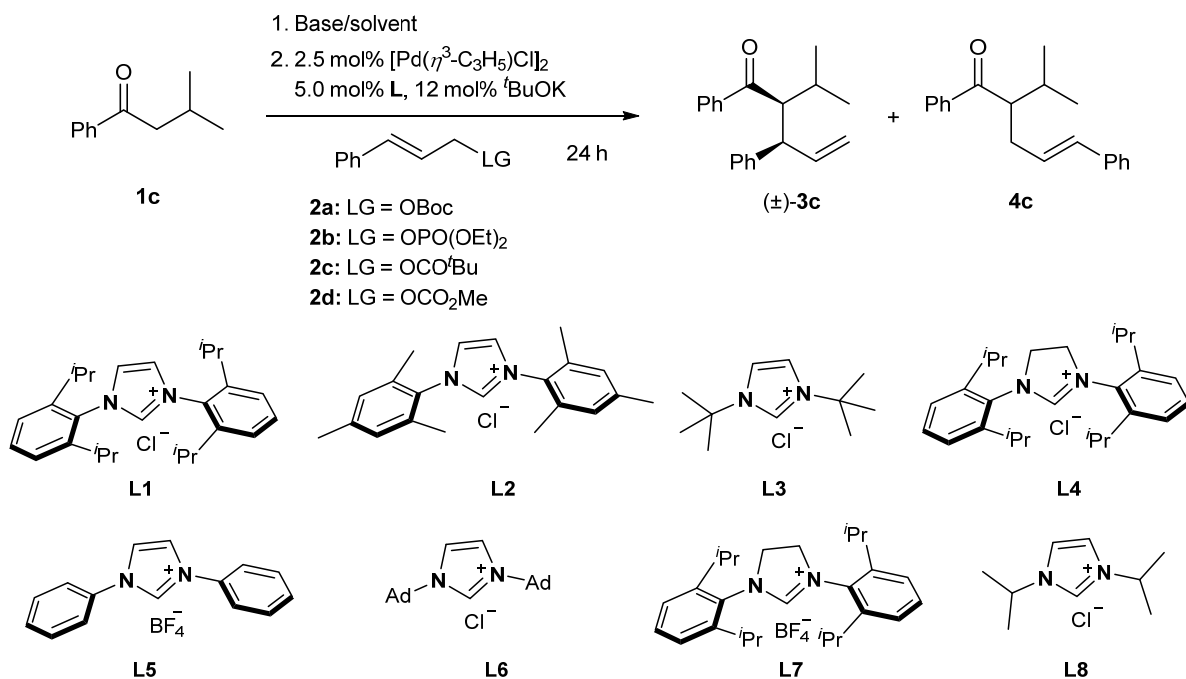

| entries          | 2  | ligand | base   | solvent | T     | 3c/4c <sup>[b]</sup> | dr <sup>[b]</sup> | yield <sup>[c]</sup> |
|------------------|----|--------|--------|---------|-------|----------------------|-------------------|----------------------|
| 1 <sup>[d]</sup> | 2a | L1     | LiHMDS | toluene | 50 °C | 95/5                 | 89/11             | 55                   |
| 2                | 2a | L1     | LiHMDS | toluene | 50 °C | 98/2                 | 85/15             | 83                   |
| 3                | 2a | L1     | LiHMDS | toluene | RT    | 92/8                 | 92/8              | 50                   |
| 4                | 2a | L4     | LiHMDS | toluene | RT    | 99/1                 | 92/8              | >95                  |
| 5                | 2a | L4     | LiHMDS | toluene | 50 °C | 95/5                 | 88/12             | >95                  |
| 6                | 2a | L7     | LiHMDS | toluene | 50 °C | 95/5                 | 88/12             | >95                  |
| 7                | 2a | L2     | LiHMDS | toluene | 50 °C | 15/85                | --                | 32                   |
| 8                | 2a | L5     | LiHMDS | toluene | 50 °C | <5/95                | --                | 28                   |

|    |           |           |        |                                 |       |       |       |     |
|----|-----------|-----------|--------|---------------------------------|-------|-------|-------|-----|
| 9  | <b>2a</b> | <b>L6</b> | LiHMDS | toluene                         | 50 °C | 82/18 | 69/31 | 77  |
| 10 | <b>2a</b> | <b>L3</b> | LiHMDS | toluene                         | 50 °C | <5/95 | --    | 33  |
| 11 | <b>2a</b> | <b>L8</b> | LiHMDS | toluene                         | 50 °C | <5/95 | --    | 24  |
| 12 | <b>2b</b> | <b>L4</b> | LiHMDS | toluene                         | RT    | 93/7  | 89/11 | >95 |
| 13 | <b>2c</b> | <b>L4</b> | LiHMDS | toluene                         | RT    | 97/3  | 90/10 | >95 |
| 14 | <b>2d</b> | <b>L4</b> | LiHMDS | toluene                         | RT    | 96/4  | 90/10 | >95 |
| 15 | <b>2a</b> | <b>L4</b> | NaHMDS | toluene                         | RT    | 96/4  | 91/9  | 97  |
| 16 | <b>2a</b> | <b>L4</b> | KHMDS  | toluene                         | RT    | 61/39 | 84/16 | 74  |
| 17 | <b>2a</b> | <b>L4</b> | LiHMDS | THF                             | RT    | 98/2  | 90/10 | 96  |
| 18 | <b>2a</b> | <b>L4</b> | LiHMDS | DME                             | RT    | 92/8  | 89/11 | 86  |
| 19 | <b>2a</b> | <b>L4</b> | LiHMDS | dioxane                         | RT    | 94/6  | 90/10 | 84  |
| 20 | <b>2a</b> | <b>L4</b> | LiHMDS | CH <sub>2</sub> Cl <sub>2</sub> | RT    | NR    |       |     |

<sup>[a]</sup>Reaction conditions: **1c**/LiHMDS/**2a**/[Pd( $\eta^3$ -C<sub>3</sub>H<sub>5</sub>)Cl]<sub>2</sub>/ligand = 200/200/100/2.5/5; 0.1 M of ketone **1c**. <sup>[b]</sup>Determined by <sup>1</sup>HNMR, *dr* is the *syn/anti* ratio of **3c**. <sup>[c]</sup>Isolated yield. <sup>[d]</sup>**1**/LiHMDS/**2a** = 100/100/100.

**Supplementary Table 6. Optimization of the reaction conditions of Pd-catalyzed allylic alkylation reaction of ketone **1f**<sup>[a]</sup>.**

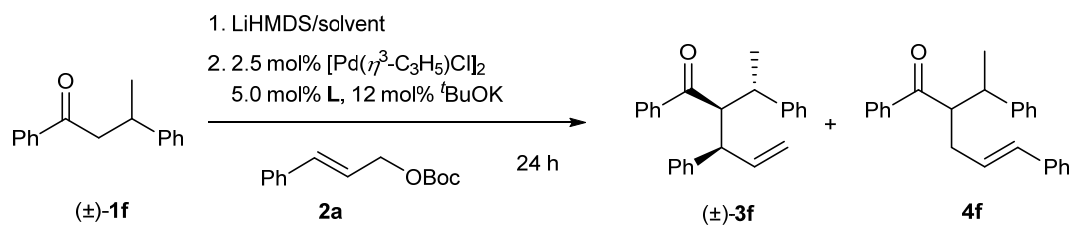

| entries | ligand    | solvent | T    | <b>3f/4f</b> <sup>[b]</sup> | <i>dr</i> <sup>[b]</sup> | yield <sup>[c]</sup> |
|---------|-----------|---------|------|-----------------------------|--------------------------|----------------------|
| 1       | <b>L1</b> | toluene | 50°C | 95/5                        | 85/15                    | 98                   |
| 2       | <b>L4</b> | toluene | 50°C | 95/5                        | 86/14                    | 97                   |
| 3       | <b>L6</b> | toluene | 50°C | --                          | --                       | complex              |
| 4       | <b>L4</b> | THF     | 50°C | 95/5                        | 86/14                    | 95                   |
| 5       | <b>L4</b> | toluene | RT   | >95/5                       | 86/14                    | 98                   |
| 6       | <b>L1</b> | toluene | RT   | >95/5                       | 86/14                    | 70                   |

<sup>[a]</sup>Reaction conditions: **1f**/LiHMDS/**2a**/[Pd( $\eta^3$ -C<sub>3</sub>H<sub>5</sub>)Cl]<sub>2</sub>/ligand = 200/200/100/2.5/5; 0.1 M of ketone **1f**. <sup>[b]</sup>Determined by <sup>1</sup>HNMR, *dr* is the ratio of **3f**/other diastereo isomers. <sup>[c]</sup>Isolated yield.

**Supplementary Table 7. Pd-catalyzed asymmetric allylic alkylation reaction of ketone **1b** with chiral NHCs <sup>[a]</sup>.**

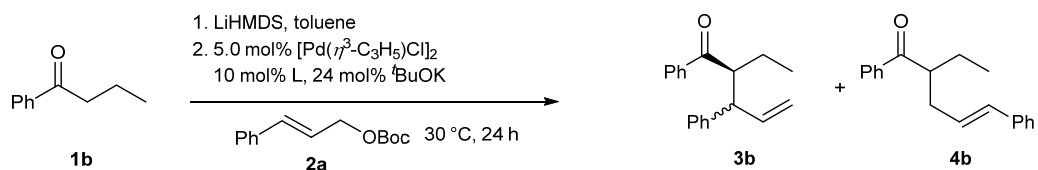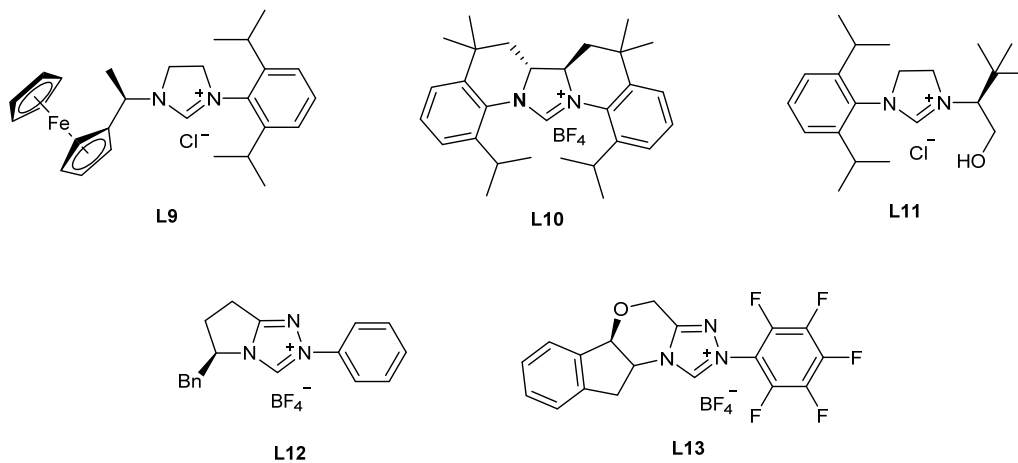

| entries | ligand | yield <sup>[b]</sup> | <b>3b/4b</b> <sup>[c]</sup> | <i>dr</i> <sup>[c]</sup> | ee( <b>3b</b> , <i>anti</i> ) <sup>[d]</sup> | ee( <b>3b</b> , <i>syn</i> ) <sup>[d]</sup> | ee ( <b>4b</b> ) <sup>[d]</sup> |
|---------|--------|----------------------|-----------------------------|--------------------------|----------------------------------------------|---------------------------------------------|---------------------------------|
|---------|--------|----------------------|-----------------------------|--------------------------|----------------------------------------------|---------------------------------------------|---------------------------------|

|   |            |    |       |       |    |    |    |
|---|------------|----|-------|-------|----|----|----|
| 1 | <b>L9</b>  | 55 | 60/40 | 67/33 | 6  | 16 | 8  |
| 2 | <b>L10</b> | 52 | 30/70 | 77/23 | nd | nd | 10 |
| 3 | <b>L11</b> | 42 | 11/89 | 59/41 | nd | nd | 0  |
| 4 | <b>L12</b> | 78 | 6/94  | nd    | nd | nd | 12 |
| 6 | <b>L13</b> | 52 | 10/90 | 64/36 | nd | nd | 4  |

<sup>[a]</sup>Reaction conditions: **1b**/LiHMDS/**2a**/[Pd( $\eta^3$ -C<sub>3</sub>H<sub>5</sub>)Cl]<sub>2</sub>/ligand = 200/200/100/5/10; 0.1 M of ketone **1b**. <sup>[b]</sup>Determined by <sup>1</sup>HNMR with mesitylene (23  $\mu$ L) as an internal standard. <sup>[c]</sup>Determined by GC. <sup>[d]</sup>Determined by HPLC. nd was not determined.

**Supplementary Table 8. Pd-catalyzed asymmetric allylic alkylation reaction of ketone 1c with chiral NHCs <sup>[a]</sup>.**

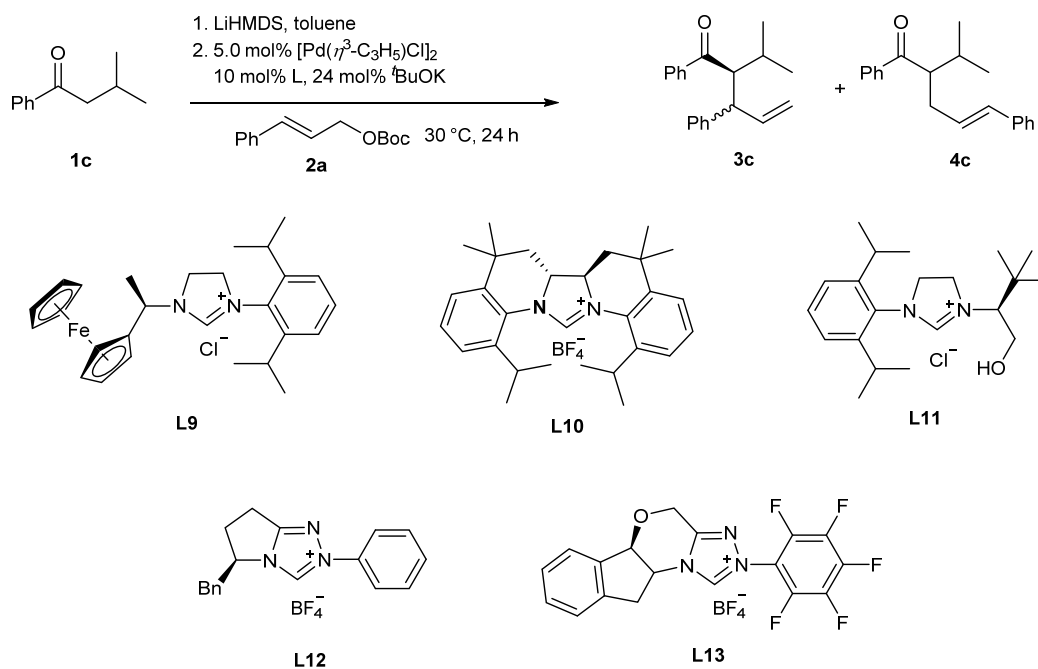

| entries | ligand     | yield <sup>[b]</sup> | <b>3c/4c</b> <sup>[c]</sup> | <i>dr</i> <sup>[c]</sup> | <i>ee</i> ( <b>3c</b> , <i>anti</i> ) <sup>[d]</sup> | <i>ee</i> ( <b>3c</b> , <i>syn</i> ) <sup>[d]</sup> | <i>ee</i> ( <b>4c</b> ) <sup>[d]</sup> |
|---------|------------|----------------------|-----------------------------|--------------------------|------------------------------------------------------|-----------------------------------------------------|----------------------------------------|
| 1       | <b>L9</b>  | 23                   | 29/71                       | 14/86                    | nd                                                   | nd                                                  | 6                                      |
| 2       | <b>L10</b> | 47                   | 25/75                       | 24/76                    | nd                                                   | nd                                                  | 8                                      |

|   |            |    |      |    |    |    |    |
|---|------------|----|------|----|----|----|----|
| 3 | <b>L11</b> | 38 | 2/98 | nd | nd | nd | 2  |
| 4 | <b>L12</b> | 30 | 4/96 | nd | nd | nd | 1  |
| 6 | <b>L13</b> | 59 | 3/97 | nd | nd | nd | 10 |

<sup>[a]</sup>Reaction conditions: **1c**/LiHMDS/**2a**/[Pd( $\eta^3$ -C<sub>3</sub>H<sub>5</sub>)Cl]<sub>2</sub>/ligand = 200/200/100/5/10; 0.1 M of ketone **1c**. <sup>[b]</sup>Determined by <sup>1</sup>HNMR with mesitylene (23  $\mu$ L) as an internal standard. <sup>[c]</sup>Determined by GC. <sup>[d]</sup>Determined by HPLC. nd was not determined.

## Supplementary Methods

### Characterization of the products

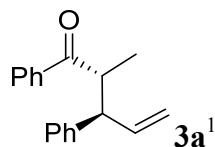

Yield: 95%; B/L: 96/4; *syn/anti*: 20/80;  $^1\text{H}$  NMR (400 MHz,  $\text{CDCl}_3$ ): (taken as a mixture of diastereomers):  $\delta$  (major diastereomer) 7.72-7.70 (m, 2H), 7.52-7.07 (m, 8H), 6.08-5.97 (m, 1H), 5.08-5.03 (m, 2H), 3.97-3.91 (m, 1H), 3.72-3.68 (m, 1H), 1.20(d,  $J = 6.8\text{Hz}$ , 3H);  $\delta$  (minor diastereomer) 4.90 (m, 2H), 0.90 (d,  $J = 6.8\text{ Hz}$ , 3H);  $^{13}\text{C}$  NMR (101 MHz,  $\text{CDCl}_3$ ):  $\delta$  (major diastereomer) 203.4, 142.8, 139.0, 137.0, 132.7, 128.5, 128.4, 128.0, 127.6, 126.3, 116.6, 53.0, 45.2, 16.5.

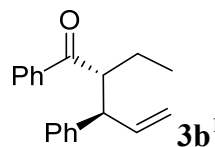

Yield: 98%; B/L: 95/5; *syn/anti*: 30/70;  $^1\text{H}$  NMR (400 MHz,  $\text{CDCl}_3$ ): (taken as a mixture of diastereomers):  $\delta$  (major diastereomer) 7.74 (d,  $J = 7.8\text{ Hz}$ , 2H), 7.56-7.01 (m, 8H), 6.10-5.98 (m, 1H), 5.14 (d,  $J = 17.1\text{ Hz}$ , 1H), 5.12 (d,  $J = 9.9\text{ Hz}$ , 1H), 3.90-3.82 (m, 1H), 3.77-3.71 (m, 1H), 1.87-1.75 (m, 2H), 0.84 (t,  $J = 7.5\text{Hz}$ , 3H);  $\delta$  (minor diastereomer ) 5.92-5.86 (m, 1H), 4.97-4.85 (m, 2H), 0.71 (t,  $J = 7.5\text{ Hz}$ , 3H);  $^{13}\text{C}$  NMR (101 MHz,  $\text{CDCl}_3$ ):  $\delta$  (taken as a mixture of diastereomers) 204.2, 203.8, 142.6, 142.0, 139.6, 139.2, 138.9, 138.5, 132.9, 132.6, 128.7, 128.6, 128.4, 128.3, 128.2(2C), 127.9, 127.8, 126.4, 126.3, 116.4, 115.8, 52.7, 52.5, 52.1, 51.8, 24.6, 24.1, 11.5, 11.4.

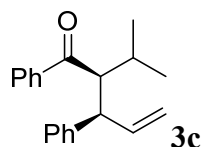

Yield: 95%; B/L: >98/2; *syn/anti*: 92/8; White solid, mp: 97-102°C; <sup>1</sup>H NMR (400 MHz, CDCl<sub>3</sub>): δ (major diastereomer) 7.88 (d, *J* = 7.2 Hz, 2H), 7.51 (t, *J* = 7.2 Hz, 1H), 7.41 (t, *J* = 7.6 Hz, 2H), 7.30-7.22 (m, 4H), 7.20-7.16 (m, 1H), 6.08-5.96 (m, 1H), 4.98 (d, *J* = 17.2 Hz, 1H), 4.92 (dd, *J* = 10.4, 1.2 Hz, 1H), 3.94-3.86 (m, 2H), 1.90-1.80 (m, 1H), 0.85 (d, *J* = 6.8 Hz, 3H), 0.83 (d, *J* = 6.8 Hz, 3H); δ (minor diastereomer) 5.23 (d, *J* = 17.2 Hz, 1H), 5.09 (dd, *J* = 10.4, 1.6 Hz, 1H); <sup>13</sup>C NMR (101 MHz, CDCl<sub>3</sub>): (major diastereomer) 203.6, 142.2, 140.0, 139.4, 132.6, 128.6, 128.4, 128.1, 128.0, 126.5, 116.1, 55.4, 50.8, 29.0, 22.0, 18.0; MS (EI) *m/z* (rel): 278 (M<sup>+</sup>, 8), 235 (40), 161 (15), 129 (12), 117 (100), 105 (99), 91 (49), 77 (90), 65 (8), 51 (21); IR (film): ν 2957 (w), 2926 (m), 1729 (w), 1660 (m), 1205 (m), 992 (m), 799 (m), 700 (s) cm<sup>-1</sup>; HRMS (EI) Calcd. for C<sub>20</sub>H<sub>22</sub>O (M<sup>+</sup>): 278.1671; Found: 278.1668.

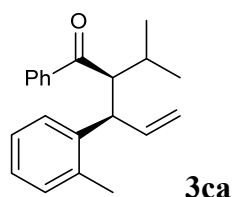

Yield: 85%; B/L: = 93/7; *syn/anti*: 90/10; <sup>1</sup>H NMR (400 MHz, CDCl<sub>3</sub>): δ (major diastereomer) 7.88 (d, *J* = 7.2 Hz, 2H), 7.51 (t, *J* = 7.2 Hz, 1H), 7.41 (t, *J* = 7.6 Hz, 2H), 7.22-7.08 (m, 4H), 6.08-5.96 (m, 1H), 4.92 (dd, *J* = 17.2, 10.0 Hz, 2H), 4.20 (t, *J* = 8.4 Hz, 1H), 3.94-3.86 (m, 1H), 2.45 (s, 3H), 1.90-1.80 (m, 1H), 0.85 (d, *J* = 6.8 Hz, 3H), 0.83 (d, *J* = 6.8 Hz, 3H); δ (minor diastereomer) 5.18 (d, *J* = 17.6 Hz, 1H), 5.06 (dd, *J* = 10.4, 1.6 Hz, 1H); <sup>13</sup>C NMR (101 MHz, CDCl<sub>3</sub>): (major diastereomer) 203.9, 140.1, 139.8, 139.1, 136.0, 132.6, 130.8, 128.4, 128.0, 127.1, 126.2, 126.1, 116.0, 54.1, 46.0, 29.0, 22.0, 19.7, 18.3; MS (EI) *m/z* (rel): 292 (M<sup>+</sup>, 6), 277 (6), 249 (31), 131 (100), 115 (31), 105 (87), 91 (44), 77 (68), 65 (5), 51 (13); IR (film): ν 2961 (w), 2926 (w), 1728 (w), 1668 (m), 1455 (m), 1272 (m), 1207 (m), 992 (m), 760 (m), 697 (s) cm<sup>-1</sup>; HRMS (EI) Calcd. for C<sub>21</sub>H<sub>24</sub>O (M<sup>+</sup>): 292.1827; Found: 292.1821.



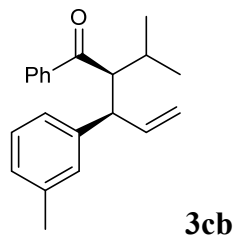

Yield: 98%; B/L: = 93/7; *syn/anti*: 91/9;  $^1\text{H}$  NMR (400 MHz,  $\text{CDCl}_3$ ):  $\delta$  (major diastereomer) 7.88 (d,  $J = 7.2$  Hz, 2H), 7.51 (t,  $J = 7.2$  Hz, 1H), 7.41 (t,  $J = 7.6$  Hz, 2H), 7.18 (t,  $J = 8.0$  Hz, 1H), 7.08-6.95 (m, 3H), 6.08-5.96 (m, 1H), 4.98 (d,  $J = 16.8$  Hz, 1H), 4.90 (dd,  $J = 10.0, 1.6$  Hz, 1H), 3.94-3.86 (m, 2H), 2.32 (s, 3H), 1.90-1.80 (m, 1H), 0.85 (d,  $J = 6.8$  Hz, 3H), 0.83 (d,  $J = 6.8$  Hz, 3H);  $\delta$  (minor diastereomer) 5.20 (d,  $J = 17.6$  Hz, 1H), 5.06 (dd,  $J = 10.4, 1.6$  Hz, 1H);  $^{13}\text{C}$  NMR (101 MHz,  $\text{CDCl}_3$ ): (major diastereomer) 203.6, 142.1, 140.0, 139.5, 138.2, 132.6, 128.9, 128.5, 128.4, 128.1, 127.3, 125.1, 116.0, 55.4, 50.8, 29.0, 22.0, 21.5, 18.0; MS (EI)  $m/z$  (rel): 292 ( $\text{M}^+$ , 12), 249 (51), 131 (100), 115 (48), 105 (99), 91 (66), 77 (94), 65 (8), 51 (20); IR (film):  $\nu$  2964 (w), 2925 (w), 1667 (m), 1454 (m), 1272 (m), 1200 (m), 993 (m), 784 (m), 702 (s)  $\text{cm}^{-1}$ ; HRMS (EI) Calcd. for  $\text{C}_{21}\text{H}_{24}\text{O}$  ( $\text{M}^+$ ): 292.1827; Found: 292.1825.

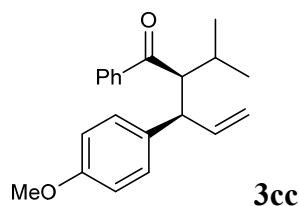

Yield: 97%; B/L: = 95/5; *syn/anti*: 90/10;  $^1\text{H}$  NMR (400 MHz,  $\text{CDCl}_3$ ):  $\delta$  (major diastereomer) 7.88 (d,  $J = 7.2$  Hz, 2H), 7.51 (t,  $J = 7.2$  Hz, 1H), 7.41 (t,  $J = 7.6$  Hz, 2H), 7.18 (d,  $J = 8.4$  Hz, 2H), 6.84 (d,  $J = 8.8$  Hz, 2H), 6.08-5.96 (m, 1H), 4.98 (d,  $J = 17.2$  Hz, 1H), 4.90 (dd,  $J = 10.0, 1.6$  Hz, 1H), 3.94-3.86 (m, 2H), 3.77 (s, 3H), 1.90-1.80 (m, 1H), 0.85 (d,  $J = 6.8$  Hz, 3H), 0.83 (d,  $J = 6.8$  Hz, 3H);  $\delta$  (minor diastereomer) 5.20 (d,  $J = 16.8$  Hz, 1H), 5.06 (dd,  $J = 10.0, 1.6$  Hz, 1H), 3.67 (s, 3H);  $^{13}\text{C}$  NMR (101 MHz,  $\text{CDCl}_3$ ): (major diastereomer) 203.7, 158.2, 140.0, 139.8, 134.2, 132.6, 129.0, 128.5, 128.1, 115.7, 114.0, 55.5, 55.2, 49.9, 29.0, 22.0, 17.9; MS (EI)  $m/z$  (rel): 308 ( $\text{M}^+$ , 1), 265 (41), 147 (100), 105 (27), 91 (24), 77 (29), 65 (2), 51 (5); IR (film):  $\nu$

2960 (w), 1665 (m), 1510 (m), 1261 (m), 996 (m), 921 (m), 825 (m), 699 (s), 655 (m)  $\text{cm}^{-1}$ ;  
HRMS (EI) Calcd. for  $\text{C}_{21}\text{H}_{24}\text{O}_2(\text{M}^+)$ : 308.1776; Found: 308.1778.

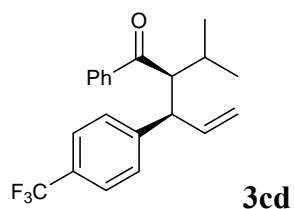

Yield: 95%; B/L: = 93/7; *syn/anti*: 93/7;  $^1\text{H}$  NMR (400 MHz,  $\text{CDCl}_3$ ):  $\delta$  (major diastereomer) 7.88 (d,  $J = 7.2$  Hz, 2H), 7.55-7.48 (m, 3H), 7.44-7.36 (m, 4H), 6.08-5.96 (m, 1H), 5.04-4.95 (m, 2H), 4.04-3.96 (m, 1H), 3.93-3.86 (m, 1H), 1.90-1.80 (m, 1H), 0.85 (d,  $J = 6.8$  Hz, 3H), 0.83 (d,  $J = 6.8$  Hz, 3H);  $\delta$  (minor diastereomer) 5.22 (d,  $J = 16.8$  Hz, 1H), 5.16 (dd,  $J = 10.0, 1.6$  Hz, 1H);  $^{13}\text{C}$  NMR (101 MHz,  $\text{CDCl}_3$ ): (major diastereomer) 202.9, 146.4, 146.3, 139.7, 138.4, 132.8, 128.5, 128.0, 125.6 (q,  $J = 3.8$  Hz), 117.0, 55.2, 50.5, 29.0, 21.8, 18.0;  $^{19}\text{F}$  NMR (376 MHz,  $\text{CDCl}_3$ ):  $\delta$  -62.4 (s); MS (EI)  $m/z$  (rel): 346 ( $\text{M}^+$ , 10), 303 (26), 185 (81), 161 (60), 105 (100), 91 (10), 77 (100), 51 (32); IR (film):  $\nu$  2965 (w), 1670 (m), 1164 (m), 1123 (s), 842(m), 697 (m)  $\text{cm}^{-1}$ ; HRMS (EI) Calcd. for  $\text{C}_{21}\text{H}_{21}\text{OF}_3(\text{M}^+)$ : 346.1545; Found: 346.1541.

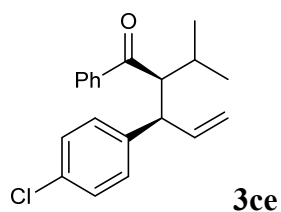

Yield: 91%; B/L: = 95/5; *syn/anti*: 90/10;  $^1\text{H}$  NMR (400 MHz,  $\text{CDCl}_3$ ):  $\delta$  (major diastereomer) 7.88 (d,  $J = 7.2$  Hz, 2H), 7.51 (t,  $J = 7.2$  Hz, 1H), 7.41 (t,  $J = 7.6$  Hz, 2H), 7.27-7.24 (m, 2H), 7.21-7.18 (m, 2H), 6.08-5.96 (m, 1H), 4.98 (d,  $J = 16.8$  Hz, 1H), 4.90 (d,  $J = 9.6$  Hz, 1H), 3.94-3.82 (m, 2H), 1.90-1.80 (m, 1H), 0.85 (d,  $J = 6.8$  Hz, 3H), 0.83 (d,  $J = 6.8$  Hz, 3H);  $\delta$  (minor diastereomer) 5.20 (d,  $J = 16.8$  Hz, 1H), 5.06 (dd,  $J = 10.0, 1.6$  Hz, 1H);  $^{13}\text{C}$  NMR (101 MHz,  $\text{CDCl}_3$ ): (major diastereomer) 203.2, 140.7, 138.9, 132.3, 129.5, 128.8, 128.5, 128.1, 116.4, 55.3, 50.1, 29.0, 21.9, 17.9; MS (EI)  $m/z$  (rel): 312 ( $\text{M}^+$ , 6), 314 (2), 269 (49), 151 (99), 115 (95), 105 (100), 89 (12), 77 (99), 69 (6), 51 (33); IR (film):  $\nu$  2964 (w), 1667 (s), 1488 (m), 1206 (m),

1093 (m), 916 (m), 831(m), 697 (s)  $\text{cm}^{-1}$ ; HRMS (EI) Calcd. for  $\text{C}_{20}\text{H}_{21}\text{OCl}(\text{M}^+)$ : 312.1281; Found: 312.1278.

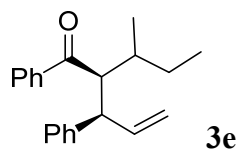

Yield: 98%; B/L: 98/2; *dr*: 62/38;  $^1\text{H}$  NMR (400 MHz,  $\text{CDCl}_3$ ):(mixture of diastereomers)  $\delta$  (major diastereomer) 7.76 (d,  $J = 7.6$  Hz, 2H), 7.51-7.08 (m, 8H), 6.06-5.96 (m, 1H), 4.98-4.80 (m, 2H), 3.96-3.80 (m, 2H), 1.20-1.15 (m, 1H), 0.90-0.80 (m, 2H), 0.75 (d,  $J = 6.8$  Hz, 3H), 0.60 (t,  $J = 7.2$  Hz, 3H);  $\delta$  (minor diastereomers) 7.80 (d,  $J = 7.6$  Hz, 2H), 5.92 (m, 1H), 4.98-4.80 (m, 2H), 0.80 (d,  $J = 6.8$  Hz, 3H), 0.65 (t,  $J = 7.2$  Hz, 3H);  $^{13}\text{C}$  NMR (101 MHz,  $\text{CDCl}_3$ ): (mixture of diastereomers) 203.8, 203.6, 142.4, 142.0, 140.2, 139.8, 139.7, 139.2, 132.6, 132.5, 128.7, 128.6, 128.5, 128.4, 128.2(2C), 128.1, 128.0, 126.6, 126.5, 116.1, 116.0, 55.6, 53.6, 50.7, 50.3, 35.8, 35.7, 28.5, 25.2, 17.7, 14.4, 12.0, 11.9; MS (EI)  $m/z$  (rel): 292 ( $\text{M}^+$ , 1), 236 (11), 175 (3), 117 (100), 105 (66), 91 (20), 77 (42), 65 (3), 51 (6); IR (film):  $\nu$  2963 (m), 2874 (m), 1963 (w), 1674 (m), 1449 (m), 1209 (m), 917 (m), 700 (s)  $\text{cm}^{-1}$ ; HRMS (EI) Calcd. for  $\text{C}_{21}\text{H}_{24}\text{O}(\text{M}^+)$ : 292.1827; Found: 292.1828.

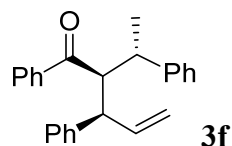

Yield: 98%; B/L: > 95/5; *dr*: 88/12; White solid, mp: 57-60°C;  $^1\text{H}$  NMR (400 MHz,  $\text{CDCl}_3$ ):  $\delta$  7.44 (d,  $J = 7.2$  Hz, 2H), 7.35 (t,  $J = 7.2$  Hz, 1H), 7.25-7.10 (m, 12H), 6.18-6.08 (m, 1H), 5.01 (dd,  $J = 10.0, 1.6$  Hz, 1H), 4.88 (d,  $J = 17.6$  Hz, 1H), 4.16 (t,  $J = 7.6$  Hz, 1H), 3.70 (t,  $J = 8.4$  Hz, 1H), 3.14-3.06 (m, 1H), 1.21 (d,  $J = 6.8$  Hz, 3H);  $^{13}\text{C}$  NMR (101 MHz,  $\text{CDCl}_3$ ): 203.4, 144.7, 142.4, 140.0, 137.8, 132.3, 128.7, 128.4, 128.0 (2C), 127.9, 127.6, 126.6, 126.4, 117.0, 57.1, 50.9, 40.6, 17.2; MS (EI)  $m/z$  (rel): 340 ( $\text{M}^+$ , 7), 249 (21), 235 (99), 223 (68), 205 (7), 194 (36), 157 (11), 147 (31), 129 (27), 117 (100), 105 (99), 91 (85), 77 (100), 65 (15), 51 (36); IR (film):  $\nu$

3059 (w), 2964 (w), 1661 (m), 1449 (m), 1209 (m), 917 (m), 752 (m), 684 (s)  $\text{cm}^{-1}$ ; HRMS (EI) Calcd. for  $\text{C}_{25}\text{H}_{24}\text{O}$  ( $\text{M}^+$ ): 340.1827; Found: 340.1823.

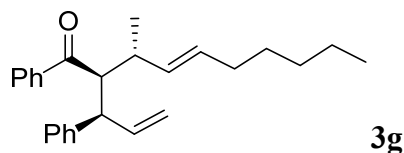

Yield: 98%; B/L: 93/7; *dr*: 77/23;  $^1\text{H}$  NMR (400 MHz,  $\text{CDCl}_3$ ): (mixture of diastereomers)  $\delta$  (major diastereomer) 7.76 (d,  $J = 7.2$  Hz, 2H), 7.51-7.08 (m, 8H), 6.02-5.95 (m, 1H), 5.35-5.25 (m, 1H), 5.18-5.10 (m, 1H), 5.00-4.90 (m, 2H), 3.95-3.85 (m, 2H), 2.45-2.35 (m, 1H), 1.82-1.73 (m, 2H), 1.30-1.11 (m, 6H), 0.88 (d,  $J = 6.8$  Hz, 3H), 0.77 (t,  $J = 7.6$  Hz, 3H);  $^{13}\text{C}$  NMR (101 MHz,  $\text{CDCl}_3$ ): (mixture of diastereomers) 203.3, 142.2, 139.7, 138.7, 133.7, 132.5, 130.6, 128.6, 128.3, 128.2, 128.1, 126.5, 116.2, 55.4, 50.7, 37.7, 32.3, 31.3, 28.9, 22.5, 16.2, 14.0; MS (EI)  $m/z$  (rel): 360 ( $\text{M}^+$ , 2), 243 (16), 129 (6), 117 (4), 105 (100), 91 (21), 77 (38), 69 (17), 55 (19); IR (film):  $\nu$  2925 (m), 1960 (w), 1963 (w), 1674 (m), 1492 (m), 1205 (m), 916 (m), 700 (s)  $\text{cm}^{-1}$ ; HRMS (EI) Calcd. for  $\text{C}_{26}\text{H}_{32}\text{O}$  ( $\text{M}^+$ ): 360.2453; Found: 360.2447.

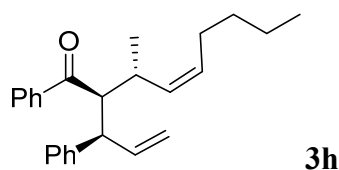

Yield: 56%; B/L: 88/12; *dr*: 86/14;  $^1\text{H}$  NMR (400 MHz,  $\text{CDCl}_3$ ): (mixture of diastereomers)  $\delta$  (major diastereomer) 7.76 (d,  $J = 7.2$  Hz, 2H), 7.51-7.08 (m, 8H), 6.10-6.00 (m, 1H), 5.30-5.20 (m, 1H), 5.05-4.95 (m, 3H), 3.92-3.84 (m, 2H), 2.80-2.72 (m, 1H), 1.90-1.85 (m, 2H), 1.35-1.20 (m, 4H), 0.90-0.85 (m, 6H);  $^{13}\text{C}$  NMR (101 MHz,  $\text{CDCl}_3$ ): (mixture of diastereomers) 203.3, 142.2, 139.6, 138.5, 133.7, 132.6, 130.0, 128.6, 128.4, 128.2, 128.0, 126.6, 116.4, 55.4, 50.9, 32.9, 31.9, 27.2, 22.4, 16.9, 14.0; MS (EI)  $m/z$  (rel): 346 ( $\text{M}^+$ , 3), 229 (12), 171 (3), 117 (47), 105 (100), 91 (19), 77 (40), 69 (17), 55 (18); IR (film):  $\nu$  2927 (m), 1960 (w), 1674 (m), 1449 (m), 1204 (m), 917 (m), 697 (s)  $\text{cm}^{-1}$ ; HRMS (EI) Calcd. for  $\text{C}_{25}\text{H}_{30}\text{O}$  ( $\text{M}^+$ ): 346.2297; Found: 346.2292.

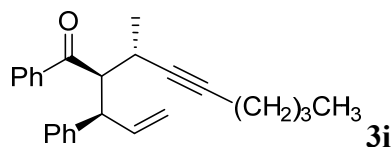

Yield: 98%; B/L: 94/6; *dr*: 93/7; Yellow oil;  $^1\text{H}$  NMR (400 MHz,  $\text{CDCl}_3$ ): (mixture of diastereomers)  $\delta$  (major diastereomer) 7.78 (d,  $J = 7.2$  Hz, 2H), 7.45 (t,  $J = 7.2$  Hz, 1H), 7.38-7.30 (m, 2H), 7.25-7.20 (m, 4H), 7.16-7.10 (m, 1H), 6.17-6.05 (m, 1H), 5.12 (d,  $J = 16.4$  Hz, 1H), 5.05 (dd,  $J = 10.0, 1.2$  Hz, 1H), 4.09 (t,  $J = 8.0$  Hz, 1H), 4.02 (t,  $J = 7.6$  Hz, 1H), 2.80-2.70 (m, 1H), 2.05-2.01 (m, 2H), 1.34-1.25 (m, 4H), 1.01 (d,  $J = 7.2$  Hz, 3H), 0.85 (m, 3H);  $^{13}\text{C}$  NMR (101 MHz,  $\text{CDCl}_3$ ):  $\delta$  (major diastereomer) 202.4, 141.7, 139.4, 137.6, 132.6, 128.6, 128.4, 128.3, 128.1, 128.0, 126.6, 83.2, 82.8, 54.9, 50.9, 30.9, 27.2, 21.9, 18.3, 17.6, 13.6; MS (EI)  $m/z$  (rel): 344 ( $\text{M}^+$ , 0.28), 287 (4), 239 (6), 227 (16), 220 (42), 209 (9), 183 (6), 171 (14), 155 (6), 129 (11), 117 (77), 105 (100), 91 (38), 77 (73), 67 (9), 51 (10); IR (film):  $\nu$  3028 (w), 2932 (w), 1675 (s), 1449 (m), 1243 (m), 995 (m), 818 (m), 700 (s)  $\text{cm}^{-1}$ ; HRMS (EI) Calcd. for  $\text{C}_{25}\text{H}_{28}\text{O}$  ( $\text{M}^+$ ): 344.2140; Found: 344.2146.

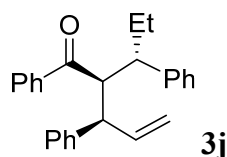

Yield: 98%; B/L: > 95/5; *dr*: 86/14; White solid, mp: 54-56°C;  $^1\text{H}$  NMR (400 MHz,  $\text{CDCl}_3$ ):  $\delta$  7.48 (d,  $J = 8.4$  Hz, 2H), 7.38 (t,  $J = 7.6$  Hz, 1H), 7.34-7.26 (m, 2H), 7.24-7.15 (m, 7H), 7.10-7.07 (m, 3H), 6.29-6.21 (m, 1H), 5.08 (dd,  $J = 10.0, 1.6$  Hz, 1H), 4.86 (d,  $J = 16.0$  Hz, 1H), 4.16 (dd,  $J = 8.4, 6.4$  Hz, 1H), 3.62 (dd,  $J = 8.8, 6.0$  Hz, 1H), 2.96-2.90 (m, 1H), 1.81-1.71 (m, 1H), 1.60-1.48 (m, 1H), 0.58 (t,  $J = 7.2$  Hz, 3H);  $^{13}\text{C}$  NMR (101 MHz,  $\text{CDCl}_3$ ): 203.9, 142.7, 142.3, 139.6, 137.0, 132.4, 128.6, 128.5, 128.4, 128.1, 127.8, 126.5, 126.4, 117.3, 57.2, 50.9, 48.9, 25.3, 12.2; MS (EI)  $m/z$  (rel): 354 ( $\text{M}^+$ , 1.92), 263 (5), 235 (59), 194 (10), 129 (14), 117 (100), 105 (100), 91 (99), 77 (95), 65 (13), 51 (18); IR (film):  $\nu$  3058 (w), 2954 (w), 1658 (m), 1206 (m), 919 (m), 759 (m), 687 (s)  $\text{cm}^{-1}$ ; HRMS (EI) Calcd. for  $\text{C}_{26}\text{H}_{26}\text{O}$  ( $\text{M}^+$ ): 354.1984; Found: 354.1979.

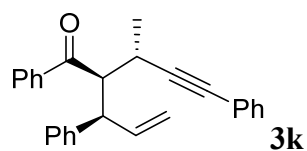

Yield: 98%; B/L: 90/10; *dr*:92/8; Yellow oil; <sup>1</sup>H NMR (400 MHz, CDCl<sub>3</sub>): (mixture of diastereomers)  $\delta$  7.85 (d,  $J$  = 8.0 Hz, 2H), 7.48 (t,  $J$  = 7.2 Hz, 1H), 7.40-7.35 (m, 2H), 7.26-7.20 (m, 7H), 7.18-7.10 (m, 3H), 6.21-6.11 (m, 1H), 5.17 (d,  $J$  = 16.8 Hz, 1H), 5.09 (d,  $J$  = 10.8 Hz, 1H), 4.20-4.15 (m, 2H), 3.05-2.98 (m, 1H), 1.21 (d,  $J$  = 6.8 Hz, 3H); <sup>13</sup>C NMR (101 MHz, CDCl<sub>3</sub>):  $\delta$  (mixture of diastereomers) 202.0, 141.5, 139.3, 137.5, 132.7, 131.4, 128.7, 128.5, 128.3, 128.1, 128.0, 127.7, 126.8, 126.1, 123.4, 117.1, 92.6, 83.3, 54.4, 50.9, 27.7, 17.2; MS (EI) *m/z* (rel): 364 (M<sup>+</sup>, 1), 259 (13), 247 (49), 220 (11), 203 (6), 181 (4), 165 (4), 141 (9), 128 (35), 115 (51), 105 (99), 91 (61), 77 (100), 65 (6), 51 (20); IR (film):  $\nu$  3059 (w), 2977(w), 1673 (m), 1240 (m), 918 (m), 755 (s), 688 (s) cm<sup>-1</sup>; HRMS (EI) Calcd. for C<sub>27</sub>H<sub>24</sub>O (M<sup>+</sup>): 364.1827; Found: 364.1823.

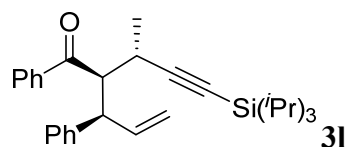

Yield: 99%; B/L: 97/3; *dr*: 96/4; White solid, mp: 49-56°C; <sup>1</sup>H NMR (400 MHz, CDCl<sub>3</sub>):  $\delta$  7.68 (d,  $J$  = 7.2 Hz, 2H), 7.42 (t,  $J$  = 7.2 Hz, 1H), 7.27 (t,  $J$  = 8.0 Hz, 2H), 7.20-7.14 (m, 4H), 7.10-7.07 (m, 1H), 6.25-6.15 (m, 1H), 5.20 (dd,  $J$  = 16.8, 0.8 Hz, 1H), 5.10 (dd,  $J$  = 10.0, 1.6 Hz, 1H), 4.19 (dd,  $J$  = 9.2, 6.4 Hz, 1H), 3.94 (dd,  $J$  = 6.8, 8.4 Hz, 1H), 2.94-2.86 (m, 1H), 1.13 (d,  $J$  = 7.2 Hz, 3H), 1.10-1.00 (m, 21H); <sup>13</sup>C NMR (101 MHz, CDCl<sub>3</sub>):  $\delta$  202.1, 141.9, 139.1, 136.6, 132.6, 128.6, 128.3, 128.2, 127.9, 126.6, 117.4, 111.3, 83.0, 55.2, 51.2, 28.6, 18.6 (2C), 18.3, 11.2; MS (EI) *m/z* (rel): 444 (M<sup>+</sup>, 2), 401 (20), 359 (11), 118 (10), 117 (100), 115 (18), 105 (11), 91 (8), 77 (8), 59 (1), 45 (1); IR (film):  $\nu$  2941 (m), 2864 (m), 2162 (w), 1676 (m), 1206 (m), 882 (m), 675 (s) cm<sup>-1</sup>; HRMS (EI) Calcd. for C<sub>30</sub>H<sub>40</sub>OSi (M<sup>+</sup>): 444.2848; Found: 444.2851.

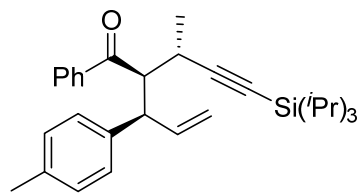

**3m**

Yield: 98%; B/L: 95/5; *dr*: 95/5; Yellow oil;  $^1\text{H NMR}$  (400 MHz,  $\text{CDCl}_3$ ):  $\delta$  7.72 (d,  $J = 7.2$  Hz, 2H), 7.43 (t,  $J = 7.2$  Hz, 1H), 7.32-7.28 (m, 2H), 7.10-6.90 (m, 4H), 6.20-6.11 (m, 1H), 5.16 (d,  $J = 16.8$  Hz, 1H), 5.06 (dd,  $J = 10.4, 1.2$  Hz, 1H), 4.12 (t,  $J = 8.0$  Hz, 1H), 4.01 (t,  $J = 7.6$  Hz, 1H), 2.92-2.85 (m, 1H), 2.25 (s, 3H), 1.12 (d,  $J = 6.8$  Hz, 3H), 1.10-1.00 (m, 21H);  $^{13}\text{C NMR}$  (101 MHz,  $\text{CDCl}_3$ ): 202.2, 139.2, 138.7, 137.2, 136.2, 132.6, 129.3, 128.4, 128.2, 127.8, 117.0, 111.4, 82.8, 54.8, 50.7, 28.5, 20.9, 18.6 (2C), 18.0, 11.2; MS (EI)  $m/z$  (rel): 458 ( $\text{M}^+$ , 0.61), 415 (4), 131 (100), 105 (11), 91 (15), 77 (9), 59 (5); IR (film):  $\nu$  2941 (m), 2864 (m), 2161 (w), 1676 (m), 1243 (m), 993 (m), 918 (s), 674 (s)  $\text{cm}^{-1}$ ; HRMS (EI) Calcd. for  $\text{C}_{31}\text{H}_{42}\text{OSi}$  ( $\text{M}^+$ ): 458.3005; Found: 458.3011.

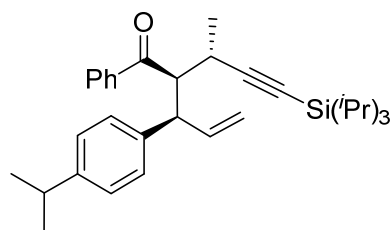

**3n**

Yield: 98%; B/L: 94/6; *dr*: 95/5; Yellow oil;  $^1\text{H NMR}$  (400 MHz,  $\text{CDCl}_3$ ):  $\delta$  7.59 (d,  $J = 7.2$  Hz, 2H), 7.38 (t,  $J = 7.2$  Hz, 1H), 7.22 (m, 2H), 7.07-6.98 (m, 4H), 6.22-6.12 (m, 1H), 5.22 (dd,  $J = 17.2, 1.2$  Hz, 1H), 5.10 (dd,  $J = 10.4, 1.6$  Hz, 1H), 4.18 (dd,  $J = 9.6, 6.4$  Hz, 1H), 3.88 (dd,  $J = 8.8, 6.4$  Hz, 1H), 2.95-2.90 (m, 1H), 2.80-2.70 (m, 1H), 1.14 (d,  $J = 7.2$  Hz, 3H), 1.13 (d,  $J = 6.8$  Hz, 3H), 1.05-0.97 (m, 21H);  $^{13}\text{C NMR}$  (101 MHz,  $\text{CDCl}_3$ ): 202.3, 147.2, 139.2, 139.2, 136.5, 132.5, 128.3, 128.0, 127.7, 126.6, 117.3, 111.5, 82.9, 55.7, 50.8, 33.7, 28.6, 24.0, 23.9, 18.7, 18.6, 18.4, 11.2; MS (EI)  $m/z$  (rel): 486 ( $\text{M}^+$ , 1.19), 443 (8), 277 (6), 159 (31), 131 (8), 117 (100), 105 (11), 91 (4), 77 (8), 59 (5); IR (film):  $\nu$  2941 (m), 2864 (m), 2161 (w), 1675 (m), 1462 (m), 1206 (m), 881 (s), 675 (s)  $\text{cm}^{-1}$ ; HRMS (EI) Calcd. for  $\text{C}_{33}\text{H}_{46}\text{OSi}$  ( $\text{M}^+$ ): 486.3318; Found: 486.3310.

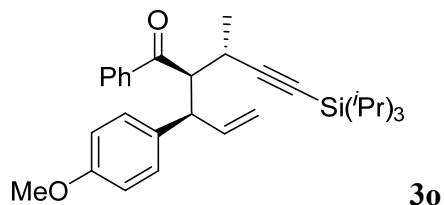

Yield: 99%; B/L: 94/6; *dr*: 96/4; Yellow oil;  $^1\text{H}$  NMR (400 MHz,  $\text{CDCl}_3$ ):  $\delta$  7.71 (d,  $J = 7.2$  Hz, 2H), 7.43 (t,  $J = 7.2$  Hz, 1H), 7.32-7.25 (m, 2H), 7.08 (d,  $J = 8.8$  Hz, 2H), 6.73 (d,  $J = 8.8$  Hz, 2H), 6.20-6.10 (m, 1H), 5.16 (d,  $J = 16.0$  Hz, 1H), 5.07 (dd,  $J = 10.0, 2.0$  Hz, 1H), 4.13 (dd,  $J = 9.2, 7.2$  Hz, 1H), 3.96 (dd,  $J = 8.0, 6.8$  Hz, 1H), 3.72 (s, 3H), 2.92-2.86 (m, 1H), 1.14 (d,  $J = 6.8$  Hz, 3H), 1.10-1.00 (m, 21H);  $^{13}\text{C}$  NMR (101 MHz,  $\text{CDCl}_3$ ): 202.3, 158.2, 139.1, 137.1, 134.0, 132.6, 128.8, 128.4, 128.2, 117.0, 114.0, 111.4, 82.9, 55.2, 55.2, 50.3, 28.5, 18.6 (2C), 18.2, 11.2; MS (EI)  $m/z$  (rel): 474 ( $\text{M}^+$ , 0.76), 431 (1), 265 (17), 147 (100), 131 (7), 105 (10), 91 (21), 77 (9), 59 (5); IR (film):  $\nu$  2941 (m), 2864 (m), 2161 (w), 1675 (m), 1511 (s), 1249 (s), 882 (s), 677 (s)  $\text{cm}^{-1}$ ; HRMS (EI) Calcd. for  $\text{C}_{31}\text{H}_{42}\text{O}_2\text{Si}$  ( $\text{M}^+$ ): 474.2954; Found: 474.2952.

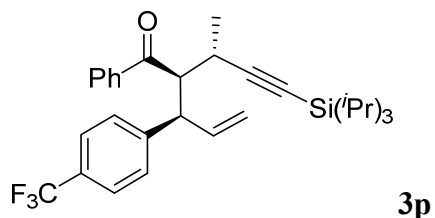

Yield: 95%; B/L: 96/4; *dr*: 97/3; Yellow oil;  $^1\text{H}$  NMR (400 MHz,  $\text{CDCl}_3$ ):  $\delta$  7.64 (d,  $J = 7.2$  Hz, 2H), 7.43-7.40 (m, 3H), 7.30-7.20 (m, 4H), 6.25-6.15 (m, 1H), 5.24 (d,  $J = 16.8$  Hz, 1H), 5.17 (dd,  $J = 10.0, 2.0$  Hz, 1H), 4.28 (dd,  $J = 9.2, 6.2$  Hz, 1H), 3.88 (dd,  $J = 9.2, 6.4$  Hz, 1H), 2.98-2.90 (m, 1H), 1.12 (d,  $J = 6.8$  Hz, 3H), 1.10-1.00 (m, 21H);  $^{13}\text{C}$  NMR (101 MHz,  $\text{CDCl}_3$ ): 201.5, 146.2, 138.8, 135.4, 132.9, 128.3, 128.2, 128.1, 125.5 (q,  $J = 3.8$  Hz), 118.4, 110.9, 83.4, 55.2, 51.0, 28.6, 18.6, 18.6, 18.5, 11.2;  $^{19}\text{F}$  NMR (376 MHz,  $\text{CDCl}_3$ ):  $\delta$  -62.6 (s); MS (EI)  $m/z$  (rel): 512 ( $\text{M}^+$ , 0.76), 469 (22), 427 (15), 284 (100), 185 (16), 165 (20), 115 (15), 105 (67), 77 (38), 59 (13); IR (film):  $\nu$  2942 (w), 2865 (w), 2162 (w), 1676 (m), 1462 (w), 1325 (s), 1124 (s), 882 (m), 674 (s)  $\text{cm}^{-1}$ ; HRMS (EI) Calcd. for  $\text{C}_{31}\text{H}_{39}\text{OF}_3\text{Si}$  ( $\text{M}^+$ ): 512.2722; Found: 512.2717.



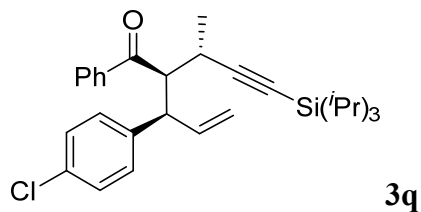

Yield: 98%; B/L: 92/8; *dr*: 95/5; Yellow oil;  $^1\text{H}$  NMR (400 MHz,  $\text{CDCl}_3$ ):  $\delta$  7.68 (d,  $J = 7.6$  Hz, 2H), 7.45 (t,  $J = 7.6$  Hz, 1H), 7.30 (t,  $J = 7.6$  Hz, 2H), 7.16-7.07 (m, 4H), 6.20-6.10 (m, 1H), 5.20 (d,  $J = 17.2$  Hz, 1H), 5.13 (dd,  $J = 10.4, 1.6$  Hz, 1H), 4.17 (dd,  $J = 9.2, 6.4$  Hz, 1H), 3.90 (dd,  $J = 8.4, 6.4$  Hz, 1H), 2.95-2.85 (m, 1H), 1.13 (d,  $J = 6.8$  Hz, 3H), 1.10-1.00 (m, 21H);  $^{13}\text{C}$  NMR (101 MHz,  $\text{CDCl}_3$ ): 201.8, 140.4, 138.9, 136.1, 132.8, 132.3, 129.2, 128.7, 128.3, 117.8, 111.0, 83.2, 55.1, 50.0, 28.6, 18.6 (2C), 18.4, 11.2; MS (EI)  $m/z$  (rel): 478 ( $\text{M}^+$ , 0.81), 435 (16), 393 (13), 242 (9), 151 (100), 131 (13), 115 (45), 105 (19), 95 (5), 77 (22), 59 (12); IR (film):  $\nu$  2941 (m), 2864 (m), 2162 (w), 1675 (m), 1207 (m), 881 (s), 676 (s)  $\text{cm}^{-1}$ ; HRMS (EI) Calcd. for  $\text{C}_{30}\text{H}_{39}\text{OSiCl}$  ( $\text{M}^+$ ): 478.2459; Found: 478.2453.

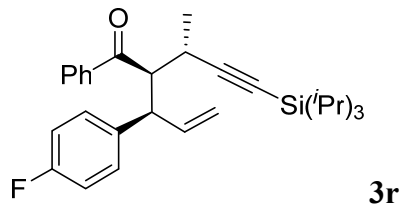

Yield: 94%; B/L: 94/6; *dr*: 95/5; Yellow oil;  $^1\text{H}$  NMR (400 MHz,  $\text{CDCl}_3$ ):  $\delta$  7.67 (d,  $J = 7.6$  Hz, 2H), 7.43 (t,  $J = 7.6$  Hz, 1H), 7.29 (t,  $J = 7.6$  Hz, 2H), 7.12-7.08 (m, 2H), 6.89-6.81 (m, 2H), 6.22-6.12 (m, 1H), 5.20 (d,  $J = 17.2$  Hz, 1H), 5.12 (dd,  $J = 10.0, 1.2$  Hz, 1H), 4.20 (dd,  $J = 9.2, 6.4$  Hz, 1H), 3.88 (dd,  $J = 8.8, 6.4$  Hz, 1H), 2.95-2.85 (m, 1H), 1.12 (d,  $J = 6.8$  Hz, 3H), 1.10-1.00 (m, 21H);  $^{13}\text{C}$  NMR (101 MHz,  $\text{CDCl}_3$ ): 202.0, 161.5 (d,  $J = 246.1$  Hz), 138.9, 137.7 (d,  $J = 3.0$  Hz), 136.2, 132.8, 129.3 (d,  $J = 7.7$  Hz), 128.3, 117.6, 115.3 (d,  $J = 21.4$  Hz), 111.1, 83.1, 55.4, 50.4, 28.7, 18.6 (2C), 18.5, 11.2;  $^{19}\text{F}$  NMR (376 MHz,  $\text{CDCl}_3$ ):  $\delta$  -116.2 (m); MS (EI)  $m/z$  (rel): 462 ( $\text{M}^+$ , 0.54), 419 (11), 377 (9), 135 (100), 109 (14), 77 (12), 59 (6); IR (film):  $\nu$  2941 (w), 2864 (w), 2162 (w), 1675 (m), 1508 (m), 1205 (m), 882 (s), 675 (s)  $\text{cm}^{-1}$ ; HRMS (EI) Calcd. for  $\text{C}_{30}\text{H}_{39}\text{OFSi}$  ( $\text{M}^+$ ): 462.2754; Found: 462.2761.

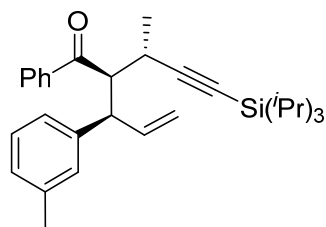

**3s**

Yield: 98%; B/L: 97/3; *dr*: 97/3; Yellow oil;  $^1\text{H}$  NMR (400 MHz,  $\text{CDCl}_3$ ):  $\delta$  7.72 (d,  $J = 7.2$  Hz, 2H), 7.43 (t,  $J = 7.2$  Hz, 1H), 7.30-7.27 (m, 2H), 7.07-7.05 (m, 1H), 7.00-6.85 (m, 3H), 6.21-6.11 (m, 1H), 5.20 (d,  $J = 17.2$  Hz, 1H), 5.10 (dd,  $J = 10.0, 1.6$  Hz, 1H), 4.16 (dd,  $J = 8.8, 6.4$  Hz, 1H), 3.96 (dd,  $J = 8.4, 6.4$  Hz, 1H), 2.95-2.85 (m, 1H), 2.21 (s, 3H), 1.14 (d,  $J = 7.2$  Hz, 3H), 1.10-1.00 (m, 21H);  $^{13}\text{C}$  NMR (101 MHz,  $\text{CDCl}_3$ ): 202.2, 141.8, 139.2, 138.1, 136.8, 132.6, 128.7, 128.5, 128.3, 128.1, 127.3, 124.9, 117.3, 111.4, 82.9, 55.2, 51.1, 28.6, 21.3, 18.7, 18.6, 18.3, 11.2; MS (EI)  $m/z$  (rel): 458 ( $\text{M}^+$ , 0.77), 415(8), 373 (8), 131 (100), 105 (13), 91 (17), 77 (11), 59 (6); IR (film):  $\nu$  2941 (m), 2864 (m), 2162 (w), 1675 (m), 1598 (w), 1204 (m), 882 (m), 672 (s)  $\text{cm}^{-1}$ ; HRMS (EI) Calcd. for  $\text{C}_{31}\text{H}_{42}\text{OSi}$  ( $\text{M}^+$ ): 458.3005; Found: 458.3002.

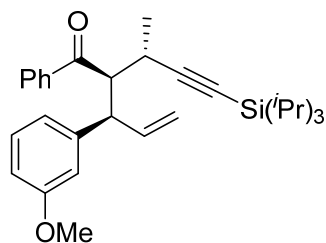

**3t**

Yield: 95%; B/L: 95/5; *dr*: 95/5; Yellow oil;  $^1\text{H}$  NMR (400 MHz,  $\text{CDCl}_3$ ):  $\delta$  7.68 (d,  $J = 7.6$  Hz, 2H), 7.43 (t,  $J = 7.6$  Hz, 2H), 7.28 (t,  $J = 7.6$  Hz, 2H), 7.09 (t,  $J = 7.6$  Hz, 1H), 6.75 (d,  $J = 7.6$  Hz, 2H), 6.68-6.62 (m, 2H), 6.20-6.10 (m, 1H), 5.20 (d,  $J = 16.0$  Hz, 1H), 5.11 (d,  $J = 10.0$  Hz, 1H), 4.12-4.05 (m, 1H), 3.94-3.82 (m, 1H), 3.67 (s, 3H), 2.93-2.80 (m, 1H), 1.13 (d,  $J = 6.8$  Hz, 3H), 1.10-1.00 (m, 21H);  $^{13}\text{C}$  NMR (101 MHz,  $\text{CDCl}_3$ ): 202.1, 159.7, 143.5, 139.1, 136.5, 132.7, 129.6, 128.3, 128.2, 120.2, 117.4, 113.6, 112.1, 111.3, 82.9, 55.1, 55.0, 51.3, 28.6, 18.6 (2C), 18.3, 11.2; MS (EI)  $m/z$  (rel): 474 ( $\text{M}^+$ , 0.63), 431 (24), 389 (7), 327 (19), 285 (8), 147 (100), 105 (16), 91(31), 77 (15), 59 (8); IR (film):  $\nu$  2941 (m), 2891 (m), 2161 (w), 1674 (m), 1598 (m),

1462 (m), 1257 (m), 919 (m), 882 (s), 674 (s)  $\text{cm}^{-1}$ ; HRMS (EI) Calcd. for  $\text{C}_{31}\text{H}_{42}\text{O}_2\text{Si}$  ( $\text{M}^+$ ): 474.2954; Found: 474.2949.

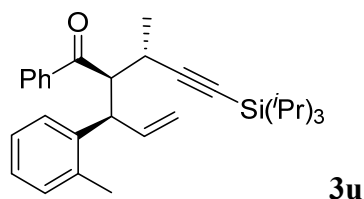

Yield: 96%; B/L: 90/10; *dr*: 93/7; Yellow oil;  $^1\text{H}$  NMR (400 MHz,  $\text{CDCl}_3$ ):  $\delta$  7.60 (d,  $J = 7.2$  Hz, 2H), 7.40 (t,  $J = 7.2$  Hz, 1H), 7.30-7.28 (m, 2H), 7.16-7.13 (m, 1H), 7.00-6.95 (m, 2H), 6.90-6.85 (m, 1H), 6.30-6.20 (m, 1H), 5.22 (dd,  $J = 16.8, 0.8$  Hz, 1H), 5.13 (dd,  $J = 10.0, 2.0$  Hz, 1H), 4.43 (dd,  $J = 9.2, 6.4$  Hz, 1H), 3.96 (dd,  $J = 8.8, 6.0$  Hz, 1H), 3.01-2.95 (m, 1H), 2.52 (s, 3H), 1.14 (d,  $J = 6.8$  Hz, 3H), 1.10-1.00 (m, 21H);  $^{13}\text{C}$  NMR (101 MHz,  $\text{CDCl}_3$ ): 202.4, 139.7, 139.3, 139.5, 135.3, 132.6, 130.7, 128.1, 127.2, 126.4, 126.0, 117.5, 111.2, 82.8, 52.8, 46.7, 28.7, 19.7, 18.7, 18.6, 11.2; MS (EI)  $m/z$  (rel): 458 ( $\text{M}^+$ , 0.75), 415 (6), 373 (7), 131 (100), 105 (12), 91(17), 77 (10), 59 (6); IR (film):  $\nu$  2941 (m), 2864 (m), 2161 (w), 1675 (m), 1462(m), 1205 (m), 994(m), 882 (m), 675 (s)  $\text{cm}^{-1}$ ; HRMS (EI) Calcd. for  $\text{C}_{31}\text{H}_{42}\text{OSi}$  ( $\text{M}^+$ ): 458.3005; Found: 458.3010.

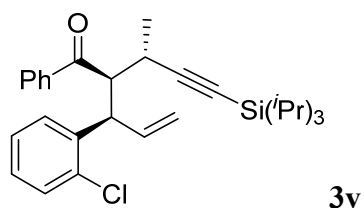

Yield: 99%; B/L: 95/5; *dr*: 94/6; Yellow oil;  $^1\text{H}$  NMR (400 MHz,  $\text{CDCl}_3$ ):  $\delta$  7.58 (d,  $J = 7.2$  Hz, 2H), 7.33 (t,  $J = 7.2$  Hz, 1H), 7.26-7.17 (m, 3H), 6.96-6.81 (m, 3H), 6.38 (m, 1H), 5.31 (dd,  $J = 16.8, 1.6$  Hz, 1H), 5.22 (dd,  $J = 10.0, 1.6$  Hz, 1H), 4.71 (dd,  $J = 9.6, 7.6$  Hz, 1H), 4.09 (dd,  $J = 9.6, 6.0$  Hz, 1H), 3.10-3.01 (m, 1H), 1.12 (d,  $J = 6.8$  Hz, 3H), 1.11-1.00 (m, 21H);  $^{13}\text{C}$  NMR (101 MHz,  $\text{CDCl}_3$ ): 202.2, 139.2, 138.9, 134.7, 133.3, 132.7, 129.6, 129.0, 128.1, 127.9, 127.6, 126.7, 118.9, 110.5, 82.9, 51.8, 47.2, 22.8, 19.3, 18.7, 11.3; MS (EI)  $m/z$  (rel): 478 ( $\text{M}^+$ , 1.32), 480 (0.63), 435 (51), 393 (21), 242 (31), 151 (100), 105 (47), 95(12), 77 (45), 59 (21); IR (film):  $\nu$

2942 (m), 2864 (m), 2162 (w), 1675 (m), 1463 (m), 1207 (m), 996 (m), 881 (m), 675 (s)  $\text{cm}^{-1}$ ;  
HRMS (EI) Calcd. for  $\text{C}_{30}\text{H}_{39}\text{OSiCl}$  ( $\text{M}^+$ ): 478.245; Found: 478.2465.

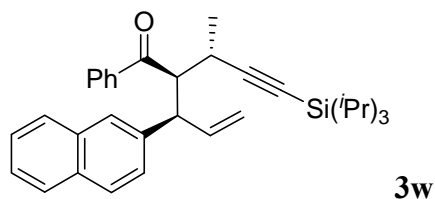

Yield: 90%; B/L: 95/5; *dr*: 98/2; The yield was determined by  $^1\text{H}$  NMR spectroscopy using mesitylene (23  $\mu\text{L}$ ) as internal standard. Yellow oil; The product **3x** was purified by a preparative kaseisorb LC ODS 2000 (10  $\times$  250 mm, 5  $\mu\text{m}$ ) column (100% acetonitrile, 5.0 mL/min, 240 nm,  $t_{\text{R}}$  = 14.1 min) for NMR, IR, and MS analysis;  $^1\text{H}$  NMR (400 MHz,  $\text{CDCl}_3$ ):  $\delta$  7.74 (m, 5H), 7.60 (s, 1H), 7.45-7.30 (m, 4H), 7.24-7.20 (m, 2H), 6.28-6.18 (m, 1H), 5.22 (d,  $J$  = 16.8 Hz, 1H), 5.13 (dd,  $J$  = 10.4, 1.2 Hz, 1H), 4.34 (t,  $J$  = 7.6 Hz, 1H), 4.10 (t,  $J$  = 7.6 Hz, 1H), 2.93-2.85 (m, 1H), 1.16 (d,  $J$  = 6.8 Hz, 3H), 1.10-1.00 (m, 21H);  $^{13}\text{C}$  NMR (101 MHz,  $\text{CDCl}_3$ )  $\delta$  202.1, 139.2, 139.0, 137.0, 133.4, 133.0, 132.3, 128.3, 128.1, 127.6, 127.5, 126.7, 126.1, 126.0, 125.5, 117.5, 111.3, 83.0, 54.7, 51.2, 28.5, 18.6 (2C), 18.1, 11.2; MS (EI)  $m/z$  (rel): 494 ( $\text{M}^+$ , 2), 451 (7), 285 (8), 168 (20), 167 (100), 152(14), 131(8), 105 (9), 77(9); IR (film):  $\nu$  2940 (m), 2863 (m), 2160 (m), 1674 (m), 1250 (m), 881 (m), 674 (s)  $\text{cm}^{-1}$ ; HRMS (EI) Calcd. for  $\text{C}_{31}\text{H}_{42}\text{OSi}$  ( $\text{M}^+$ ): 494.3005; Found: 494.2998.

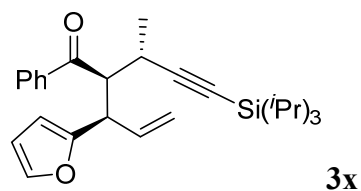

Yield: 98%; B/L: = 95/5; *dr*: 95/5; Yellow oil;  $^1\text{H}$  NMR (400 MHz,  $\text{CDCl}_3$ ):  $\delta$  7.75 (d,  $J$  = 8.0 Hz, 2H), 7.45 (t,  $J$  = 7.2 Hz, 1H), 7.38-7.30 (m, 2H), 7.15-7.12 (m, 1H), 6.09-6.07 (m, 1H), 6.05-5.95 (m, 1H), 5.90 (d,  $J$  = 2.0 Hz, 1H), 5.30 (d,  $J$  = 16.0 Hz, 1H), 5.20 (dd,  $J$  = 10.4, 2.0 Hz, 1H), 4.34 (dd,  $J$  = 9.6, 5.6 Hz, 1H), 4.05 (dd,  $J$  = 9.2, 5.6 Hz, 1H), 2.98-2.90 (m, 1H), 1.12 (d,  $J$  = 6.8 Hz, 3H), 1.10-1.00 (m, 21H);  $^{13}\text{C}$  NMR (101 MHz,  $\text{CDCl}_3$ ): 201.6, 154.6, 141.0, 138.5, 133.6, 132.7, 128.2, 128.1, 118.5, 110.9, 110.0, 106.1, 83.3, 54.5, 44.8, 28.5, 18.8, 18.6 (2C), 11.2; MS

(EI)  $m/z$  (rel): 434 ( $M^+$ , 0.27), 391 (10), 373 (3), 261 (3), 225 (14), 131 (8), 107 (100), 91 (3), 79 (30), 77 (26), 59 (6); IR (film):  $\nu$  2941 (m), 2865 (m), 2162 (w), 1677 (m), 1462 (m), 1207 (m), 994 (m), 881 (s), 675 (s)  $\text{cm}^{-1}$ ; HRMS (EI) Calcd. for  $\text{C}_{28}\text{H}_{38}\text{O}_2\text{Si}$  ( $M^+$ ): 434.2641; Found: 434.2645.

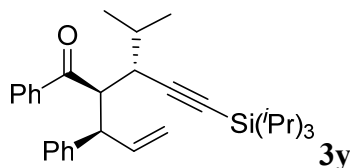

Yield: 99%; B/L:93/7; *dr*: 95/5; White solid, mp: 68-73°C; <sup>1</sup>H NMR (400 MHz, CDCl<sub>3</sub>):  $\delta$  7.41 (d,  $J = 7.6$  Hz, 2H), 7.35 (t,  $J = 7.2$  Hz, 1H), 7.19 (t,  $J = 8.0$  Hz, 2H), 7.10-7.05 (m, 4H), 7.04-7.01 (m, 1H), 6.45-6.35 (m, 1H), 5.36 (dd,  $J = 17.2, 2.0$  Hz, 1H), 5.28 (dd,  $J = 10.0, 2.0$  Hz, 1H), 4.35 (dd,  $J = 10.4, 4.0$  Hz, 1H), 3.90 (dd,  $J = 11.2, 4.0$  Hz, 1H), 3.05-3.01 (m, 1H), 1.55-1.50 (m, 1H), 1.20-1.10 (m, 21H), 1.01 (d,  $J = 6.4$  Hz, 3H), 0.81 (d,  $J = 6.4$  Hz, 3H); <sup>13</sup>C NMR (101 MHz, CDCl<sub>3</sub>): 202.4, 142.8, 138.6, 135.2, 132.6, 128.4, 128.1, 128.0, 127.8, 126.5, 118.1, 107.4, 85.7, 53.9, 51.5, 42.4, 28.3, 22.4, 18.8 (2C), 16.9, 11.4; MS (EI)  $m/z$  (rel): 472 ( $M^+$ , 1), 429 (22), 387 (4), 355 (5), 269 (8), 220 (7), 131(10), 117(100), 105 (19), 91(12), 77 (13), 59 (11); IR (film):  $\nu$  2941 (m), 2864 (m), 2165 (w), 1668 (m), 1451 (m), 926 (m), 725 (m), 696 (s), 675 (s)  $\text{cm}^{-1}$ ; HRMS (EI) Calcd. for  $\text{C}_{32}\text{H}_{44}\text{OSi}$  ( $M^+$ ): 472.3161; Found: 472.3165.

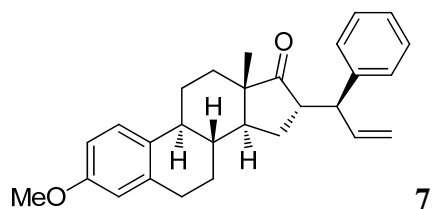

Yield: 96%; B/L: 84/16; *dr*: 91/9;  $[\alpha]_D^{28} = 9.15$  ( $c$ 1.0, CHCl<sub>3</sub>); White solid, mp: 126-129°C; <sup>1</sup>H NMR (400 MHz, CDCl<sub>3</sub>)  $\delta$  7.35-7.15 (m, 6H), 6.71 (dd,  $J = 8.8, 2.8$  Hz, 1H), 6.63 (d,  $J = 2.8$  Hz, 1H), 6.06-5.96 (m, 1H), 5.18-5.10 (m, 2H), 4.10-4.08 (m, 1H), 3.76 (s, 3H), 3.04 (dt,  $J = 10.8, 2.7$  Hz, 1H), 2.91-2.88 (m, 2H), 2.42-2.38 (m, 1H), 2.22-2.16 (m, 2H), 2.01-1.85 (m, 3H), 1.60-1.30 (m, 5H), 0.95 (s, 3H); <sup>13</sup>C NMR (101 MHz, CDCl<sub>3</sub>): 219.8, 157.6, 142.8, 137.7, 137.2,

132.1, 128.5, 127.9, 126.5, 126.3, 117.9, 113.9, 111.5, 55.2, 49.7, 48.7, 48.5, 48.3, 43.9, 38.4, 31.3, 29.6, 26.5, 25.8, 24.6, 15.2; IR (film):  $\nu$  2919 (m), 2858 (m), 1735 (m), 1496 (m), 1278 (s), 1011(s), 799 (s), 698 (m)  $\text{cm}^{-1}$ ; HRMS (EI) Calcd. for  $\text{C}_{27}\text{H}_{24}\text{O}$  ( $\text{M}^+$ ): 400.2402; Found: 400.2406.

## Synthetic application

### 1. gram-scale experiment

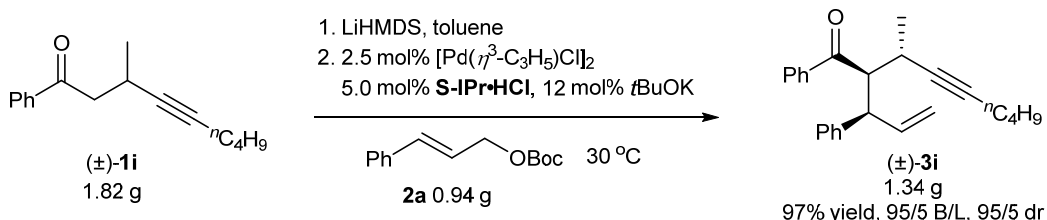

A dry schlenk tube (100 mL) was flame dried and flushed with Argon. Ketone **1i** (1.824g, 8.0 mmol) and toluene (40.0 mL) were added into the dry Schlenk tube. LHMDS(1.0 M in THF, 8.0 mL, 8.0 mmol) were added at 0°C and stirred at room temperature for 30 min. In a separated flask,  $[\text{Pd}(\eta^3\text{-C}_3\text{H}_5)\text{Cl}]_2$ (38 mg, 0.10 mmol), **S-IPr·HCl** (88 mg, 0.12 mmol) and toluene (20 mL) were added, followed by addition of *t*-BuOK (1.0 M in THF, 0.5 mL, 0.5 mmol) at 0°C. The resulting mixture was stirred at room temperature for 30 min, then added to the ketone solution. The allylic substrates **2a**(936 mg, 4.0 mmol) and toluene (20 mL) was then added and the mixture was stirred at 30 °C. After 48h the reaction was complete (monitored by GC/MS), the reaction mixture was quenched by  $\text{H}_2\text{O}$  (2 mL). The resulting mixture was extracted with diethyl ether ( $3 \times 10$  mL). The combined organic layer was washed with saturated brine (20 mL), dried ( $\text{Na}_2\text{SO}_4$ ) and concentrated in vacuo to afford a crude product. The diastereoselectivity of the crude product was then determined by  $^1\text{H}$  NMR spectroscopy. After this analysis, the crude reaction mixture was purified by flash column silica gel chromatography (eluting with petroleum ether/toluene 1/1) to yield the product **3i**(1.34 g, yield 97%) and **1i** was recovered (820 mg, yield 90%). **3i**: B/L: 95/5; *dr*: 95/5.

### 2. Chirality transfer from enantiomerically enriched $\beta$ -substituted ketones.

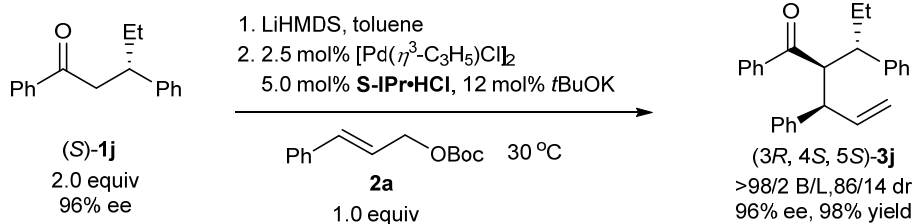

The **(S)-1j** was prepared according to the literature procedure<sup>2</sup>.

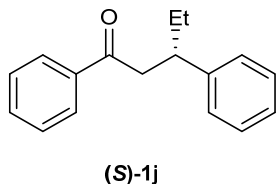

ee: 96%;  $[\alpha]_D^{30} = 4.0$  (*c* 1.0,  $\text{CHCl}_3$ );  $^1\text{H NMR}$  (400 MHz,  $\text{CDCl}_3$ ):  $\delta$  7.92-7.83 (m, 2H), 7.53-7.46 (m, 1H), 7.44-7.35 (m, 2H), 7.31-7.11 (m, 5H), 3.33-3.16 (m, 3H), 1.83-1.55 (m, 2H), 0.80 (t,  $J = 7.6$  Hz, 3H); HPLC (Chiralcel AD-H, Hexane/*i*-Propanol = 95/5, 1.0 mL/min, 214 nm),  $t_R$  (major) = 5.6 min for (*S*),  $t_R$  (minor) = 6.5 min for (*R*).

A dry schlenk tube was flame dried and flushed with Argon. Ketone **(S)-1j** (95.2 mg, 0.4 mmol) and toluene (2.0 mL) were added into the dry Schlenk tube. LHMDS (1.0 M in THF, 0.4 mL, 0.4 mmol) were added at 0 °C and stirred at room temperature for 30 min. In a separated flask,  $[\text{Pd}(\eta^3\text{-C}_3\text{H}_5)\text{Cl}]_2$  (1.9 mg, 0.005 mmol), S-IPr-HCl (4.4 mg, 0.006 mmol) and toluene (1.0 mL) were added, followed by addition of *t*-BuOK (1.0 M in THF, 25  $\mu\text{L}$ , 0.025 mmol) at 0 °C, the resulting mixture was stirred at room temperature for 30 min, then added to the ketone solution. The allylic substrate **2a** (47 mg, 0.2 mmol) and toluene (1.0 mL) was added and the mixture was stirred at 30 °C. After the reaction was complete, the reaction mixture was quenched by  $\text{H}_2\text{O}$  (0.5 mL). The solution was dried (anhydrous  $\text{Na}_2\text{SO}_4$ ) and then filtered through a 0.5 inch plug of silica gel (eluting with EtOAc) to remove the solid. The crude reaction mixture was concentrated under reduced pressure.  $\text{CDCl}_3$  (0.7-0.8 mL) was added to dissolve the crude reaction mixture, and mesitylene (23  $\mu\text{L}$ ) was added as an internal standard. The diastereoselectivity was then determined by  $^1\text{H NMR}$  spectroscopy. After this analysis, the crude reaction mixture was purified by flash column silica gel chromatography (eluting with petroleum ether/toluene 1/1) to yield the product **3j** (69 mg, yield 98%, B/L > 98/2, *dr* = 86/14). ee: 96%;  $[\alpha]_D^{28} = -33.9$  (*c* 0.50,

CHCl<sub>3</sub>); HPLC (Agilent SDC-AD-H, CO<sub>2</sub>/*i*-Propanol = 90/10, 1.3 mL/min, 214 nm), *t*<sub>R</sub> (major) = 8.08 min, *t*<sub>R</sub>(minor) = 9.04 min.

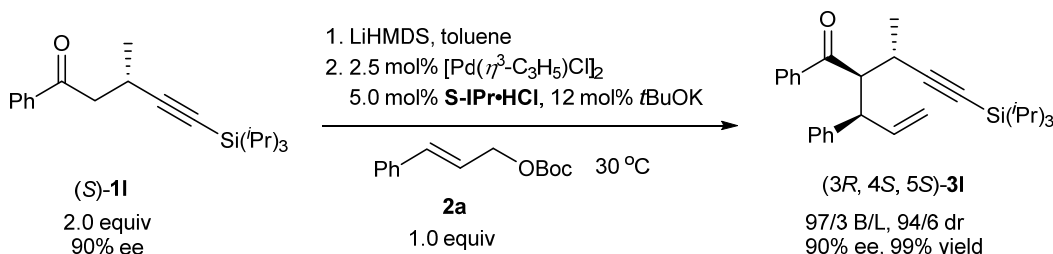

The (S)-**11** was prepared according to the literature procedure<sup>3</sup>.

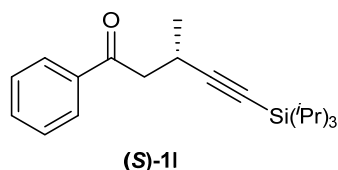

ee: 90% (*S*); [ $\alpha$ ]<sub>D</sub><sup>30</sup> = -2.2 (*c* 1.0, CHCl<sub>3</sub>); <sup>1</sup>H NMR (400 MHz, CDCl<sub>3</sub>):  $\delta$  7.96 (d, *J* = 7.2 Hz, 2H), 7.56 (t, *J* = 7.2 Hz, 1H), 7.46 (t, *J* = 8.0 Hz, 2H), 3.29-3.19 (m, 2H), 3.05-2.98 (m, 1H), 1.28 (d, *J* = 6.8 Hz, 3H), 1.05-0.80 (m, 21H); HPLC (Agilent SFC-AD-H, CO<sub>2</sub>/*i*-Propanol = 99/1, 1.5 mL/min, 230 nm), *t*<sub>R</sub> (major) = 6.87 min, *t*<sub>R</sub>(minor) = 7.54 min for (*R*). {The absolute configuration of **11** was determined to be *S* by comparing the reported HPLC traces of (S)-**11**<sup>2</sup>. Chiralcel OJ-H Column hexanes, 0.1 mL/min, 214 nm, *t*<sub>R</sub> (major) = 42.61 min for (*S*), *t*<sub>R</sub> (minor) = 45.76 min. ([ $\alpha$ ]<sub>D</sub><sup>30</sup> = -2.2, *c* 1.0 in CHCl<sub>3</sub>) }.

A dry schlenk tube was flame dried and flushed with Argon. ketone (S)-**11** (132 mg, 0.4 mmol) was and toluene (2.0 mL) were added into the dry Schlenk tube. LHMDS (1.0 M in THF, 0.4 mL, 0.4 mmol) were added at 0 °C and stirred at room temperature for 30 min. In a separated flask, [Pd( $\eta^3$ -C<sub>3</sub>H<sub>5</sub>)Cl]<sub>2</sub> (1.9 mg, 0.005 mmol), S-IPr·HCl (4.4 mg, 0.006 mmol) and toluene (1.0 mL) were added, followed by addition of *t*-BuOK (1.0 M in THF, 25  $\mu$ L, 0.025 mmol) at 0 °C. The resulting mixture was stirred at room temperature for 30 min, then added to the ketone solution. The allylic substrate **2a** (47 mg, 0.2 mmol) and toluene (1.0 mL) was then added and the mixture was stirred at 30 °C. After the reaction was complete, the reaction mixture was quenched by H<sub>2</sub>O



(0.5 mL), the solution was dried (anhydrous  $\text{Na}_2\text{SO}_4$ ) and then filtered through a 0.5 inch plug of silica gel (eluting with EtOAc) to remove the solid. The crude reaction mixture was concentrated under reduced pressure.  $\text{CDCl}_3$  (0.7-0.8 mL) was added to dissolve the crude reaction mixture, and mesitylene (23  $\mu\text{L}$ ) was added as an internal standard. The diastereoselectivity was then determined by  $^1\text{H}$  NMR spectroscopy. After this analysis, the crude reaction mixture was purified by flash column silica gel chromatography (eluting with petroleum ether/toluene 1/1) to yield the product **3i** (86.9 mg, B/L = 97/3,  $dr = 96/4$ ). ee 90%;  $[\alpha]_{\text{D}}^{28} = 3.7$  ( $c$  1.0,  $\text{CHCl}_3$ ); HPLC (Agilent SDC-OJ,  $\text{CO}_2/i$ -Propanol = 95/5, 1.3 mL/min, 214 nm),  $t_{\text{R}}$  (major) = 4.58 min,  $t_{\text{R}}$ (minor) = 5.80 min.

### 3. Pauson-Khand reaction of product **3i**

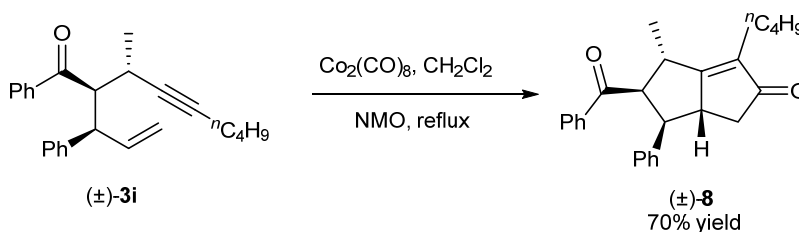

A dry schlenk tube (100 mL) was flame dried and flushed with Argon. Enyne **3i** (69 mg, 0.2 mmol, 1.0 equiv) was added slowly to a stirred solution of  $\text{Co}_2(\text{CO})_8$  (81 mg, 0.2 mmol, 1.0 equiv) in  $\text{CH}_2\text{Cl}_2$  (5.0 mL) at  $0^\circ\text{C}$ . Stirring was continued at room temperature for 24 h. After the reaction mixture was cooled to  $0^\circ\text{C}$  (ice-bath), NMO in  $\text{CH}_2\text{Cl}_2$  (2.0 mL) was added slowly. The reaction mixture was heated to reflux for 36 h, the reaction was complete (monitored by TLC). The reaction mixture was concentrated under reduced pressure to afford a crude product, which was purified by chromatography (eluting with petroleum ether/EtOAc 10/1) to yield the product **8** (50.2 mg, yield 70%). White solid, mp:  $98\text{-}102^\circ\text{C}$ ;  $^1\text{H}$  NMR (400 MHz,  $\text{CDCl}_3$ ):  $\delta$  7.55 (d,  $J = 7.2$  Hz, 2H), 7.36 (t,  $J = 7.6$  Hz, 2H), 7.26-7.18 (m, 2H), 7.10-7.01 (m, 4H), 7.01-6.90 (m, 1H), 4.15 (dd,  $J = 9.6, 4.4$  Hz, 1H), 3.78-3.68 (m, 2H), 3.21 (dd,  $J = 12.4, 9.2$  Hz, 1H), 2.60 (dd,  $J = 17.6, 5.2$  Hz, 1H), 2.42-2.34 (m, 1H), 2.33-2.22 (m, 1H), 2.01 (dd,  $J = 18.0, 3.6$  Hz, 1H), 1.48 (d,  $J = 7.6$  Hz, 3H), 1.50-1.30 (m, 4H), 0.93 (t,  $J = 7.2$  Hz, 3H);  $^{13}\text{C}$  NMR (101 MHz,  $\text{CDCl}_3$ ): 210.0, 202.1, 182.5, 138.1, 137.7, 137.3, 132.7, 128.2, 128.1, 128.0, 126.9, 60.4, 52.8, 47.7, 40.9, 38.9, 31.3, 22.9, 22.8, 17.9, 13.9; MS (EI)  $m/z$  (rel): 372 ( $\text{M}^+$ , 18), 344 (6), 315 (11), 281 (12),

267(24), 165(7), 128 (6), 115(12), 105 (100), 91(27), 77 (61), 65 (4), 51(7); IR (film):  $\nu$  2963 (w), 2919 (w), 1661 (m), 1092 (m), 799 (s)  $\text{cm}^{-1}$ ; HRMS (EI) Calcd. for  $\text{C}_{26}\text{H}_{28}\text{O}_2$  ( $\text{M}^+$ ): 372.2089; Found: 372.2084.

#### 4. Synthesis of cyclopentene **10** via metathesis reaction of desilylated product **31**

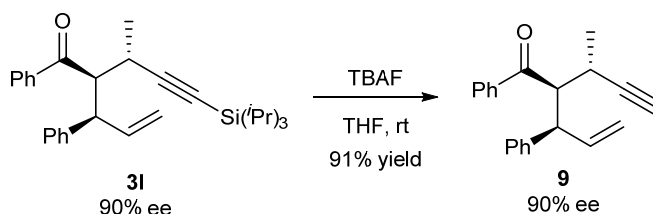

To a solution of **31** (65.2 mg, 0.15 mmol) in THF (2.0 mL) was added tetrabutylammonium fluoride (TBAF) solution (0.16 mL, 1.0 M in THF) at 0 °C, and the mixture was stirred at room temperature for 2 h. The mixture was quenched with  $\text{H}_2\text{O}$  and extracted with ethyl acetate. The combined organic layer was washed with brine, dried over  $\text{MgSO}_4$ , filtered, and concentrated under reduced pressure. The residue was subjected to a column chromatography on silica gel (hexane/ethyl acetate = 10/1) to give compound **9** (39.2 mg, yield 91%). ee: 90%;  $[\alpha]_{\text{D}}^{28} = 39.8$  ( $c$  1.0,  $\text{CHCl}_3$ ); Yellow oil;  $^1\text{H}$  NMR (400 MHz,  $\text{CDCl}_3$ ):  $\delta$  7.71 (d,  $J = 7.6$  Hz, 2H), 7.45 (t,  $J = 7.6$  Hz, 1H), 7.18 (m, 4H), 7.10 (m, 1H), 6.20-6.10 (m, 1H), 5.18 (d,  $J = 16.4$  Hz, 1H), 5.10 (dd,  $J = 10.4, 1.6$  Hz, 1H), 4.12 (t,  $J = 7.2$  Hz, 1H), 3.99 (t,  $J = 7.6$  Hz, 1H), 2.90-2.80 (m, 1H), 2.12 (d,  $J = 2.4$  Hz, 1H), 1.14 (d,  $J = 7.2$  Hz, 3H);  $^{13}\text{C}$  NMR (101 MHz,  $\text{CDCl}_3$ ): 202.0, 142.0, 139.1, 136.8, 133.0, 128.6, 128.4, 128.2, 128.0, 126.7, 117.4, 87.0, 71.0, 54.7, 51.0, 27.2, 17.8; MS (EI)  $m/z$  (rel): 288 ( $\text{M}^+$ , 2), 235 (9), 220 (20), 197 (12), 183 (17), 171 (6), 141 (9), 128 (12), 117 (96), 105 (100), 91 (27), 77 (66), 65 (7), 51 (17); IR (film):  $\nu$  3297(m), 2979 (w), 1674 (s), 1493 (m), 1247 (s), 921 (m), 758 (m), 701 (s)  $\text{cm}^{-1}$ ; HRMS (EI) Calcd. for  $\text{C}_{21}\text{H}_{20}\text{O}$  ( $\text{M}^+$ ): 288.1514; Found: 288.1508; HPLC (Agilent SDC-OJ,  $\text{CO}_2$ /*i*-Propanol = 95/5, 1.3 mL/min, 214 nm),  $t_{\text{R}}$  (minor) = 6.80 min,  $t_{\text{R}}$  (major) = 8.69 min.

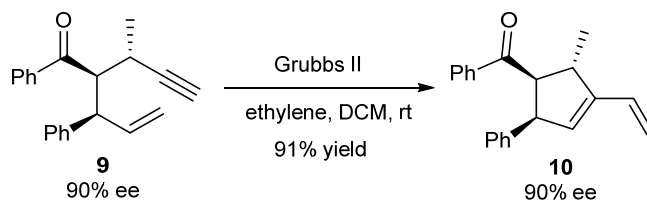

Freshly distilled  $\text{CH}_2\text{Cl}_2$  was degassed for 1 h. The enyne **9** (7.0 mg, 0.024 mmol) was dissolved in  $\text{CH}_2\text{Cl}_2$  (4 mL) and ethylene gas was passed through the solution for 30 min. GrubbsII catalyst (3.0 mg, 15% mol) was then added, and the solution was degassed again with ethylene for 30 min. The mixture was stirred under an atmosphere of ethylene at room temperature. The reaction was monitored by TLC (ca. 2h). The mixture was then concentrated and the residue was purified by neutral alumina (hexane/ethyl acetate = 10/1) to give compound **10** (6.5 mg, yield 91%). ee: 90%;  $[\alpha]_{\text{D}}^{30} = -216.4$  ( $c$  0.5,  $\text{CHCl}_3$ ); Yellow solid, mp: 69–75°C;  $^1\text{H}$  NMR (400 MHz,  $\text{CDCl}_3$ ):  $\delta$  7.62 (d,  $J = 7.6$  Hz, 2H), 7.44 (t,  $J = 7.2$  Hz, 1H), 7.35–7.29 (m, 2H), 7.01–6.96 (m, 3H), 6.74–6.70 (m, 2H), 6.51 (dd,  $J = 18.4, 11.2$  Hz, 1H), 5.67 (s, 1H), 5.42 (d,  $J = 18.4$  Hz, 1H), 5.23 (d,  $J = 10.0$  Hz, 1H), 4.41 (d,  $J = 10.8$  Hz, 1H), 4.11 (dd,  $J = 7.2$  Hz,  $J = 9.6$  Hz, 1H), 3.95–3.85 (m, 1H), 1.26 (d,  $J = 7.2$  Hz, 3H);  $^{13}\text{C}$  NMR (101 MHz,  $\text{CDCl}_3$ ): 199.6, 146.9, 139.5, 138.0, 132.4, 132.0, 130.5, 128.5, 128.2, 127.9, 127.8, 126.6, 115.7, 60.9, 53.9, 39.4, 19.7; MS (EI)  $m/z$  (rel): 288 ( $\text{M}^+$ , 22), 273 (30), 183 (28), 168 (24), 141 (13), 105 (100), 91 (26), 77 (60), 51 (12); IR (film):  $\nu$  2961 (w), 2926 (w), 1672 (m), 1245 (m), 1023 (m), 692 (s)  $\text{cm}^{-1}$ ; HRMS (EI) Calcd. for  $\text{C}_{21}\text{H}_{20}\text{O}$  ( $\text{M}^+$ ): 288.1514; Found: 288.1518. HPLC (Agilent SDC-OD-H,  $\text{CO}_2/i$ -Propanol = 90/10, 1.3 mL/min, 214 nm),  $t_{\text{R}}$  (minor) = 8.83 min,  $t_{\text{R}}$  (major) = 10.49 min.

### Mechanistic studies.

The allyl compound (S)-(Z)-**5** is prepared according to the literature procedure<sup>4,5</sup>.

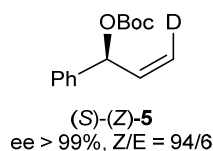

(*S*)-(*Z*)-**5**, ee = 99.3%,  $[\alpha]_D^{23} = -32.7$  ( $c$  1.0,  $\text{CHCl}_3$ );  $^1\text{H NMR}$  (400 MHz,  $\text{CDCl}_3$ ):  $\delta$  7.37-7.26 (m, 5H), 6.04-6.01 (m, 2H), 5.24 (dt,  $J = 9.2, 4.0$  Hz, 1H), 1.47 (s, 9H); HPLC: Chiralcel OJ-H (25 cm  $\times$  0.46 cm), hexane/2-propanol = 95/5, 0.7 mL/min, 214 nm,  $t_R = 7.58$  min (minor), 8.90 min (major).

### 1. The reaction of ketone **1a** with (*S*)-(*Z*)-**5** catalyzed by $[\text{Pd}(\eta^3\text{-C}_3\text{H}_5)\text{Cl}]_2/\text{S-IPr}$

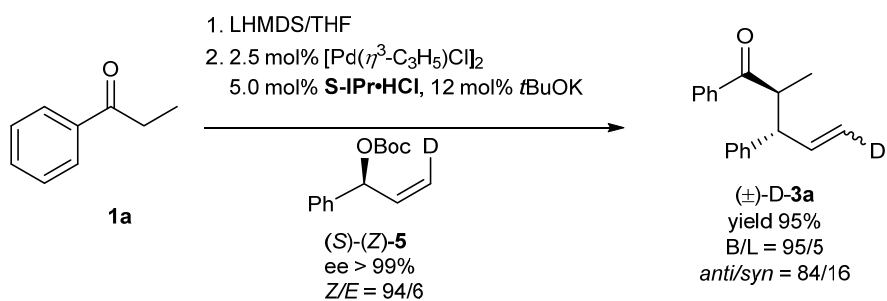

A dry schlenk tube was flame dried and flushed with Argon. Ketone **1a** (54 mg, 0.4 mmol) was and THF (2.0 mL) were added into the dry Schlenk tube. LHMDS (1.0 M in THF, 0.4 mL, 0.4 mmol) were added at 0°C and stirred at room temperature for 30 min. In a separated flushed flask,  $[\text{Pd}(\eta^3\text{-C}_3\text{H}_5)\text{Cl}]_2$  (1.9 mg, 0.005 mmol), S-IPr·HCl (4.4 mg, 0.006 mmol) and THF (1.0 mL) were added, followed by addition of *t*-BuOK (1.0 M in THF, 25  $\mu\text{L}$ , 0.025 mmol) at 0°C. The resulting mixture was stirred at room temperature for 30 min. The substrates (*S*)-(*Z*)-**5** (47 mg, 0.2 mmol) and THF (1.0 mL) was then added and the mixture was stirred at 30 °C. After the reaction was complete, the reaction mixture was quenched by  $\text{H}_2\text{O}$  (0.5 mL), the solution was dried (anhydrous  $\text{Na}_2\text{SO}_4$ ) and then filtered through a 0.5 inch plug of silica gel (eluting with EtOAc) to remove the solid. The crude reaction mixture was concentrated under reduced pressure.  $\text{CDCl}_3$  (0.8 mL) was added to dissolve the crude reaction mixture, and mesitylene (23  $\mu\text{L}$ ) was added as an internal standard. The diastereoselectivity was then determined by  $^1\text{H NMR}$  spectroscopy. After this analysis, the crude reaction mixture was purified by flash column silica gel chromatography (eluting with petroleum ether/ethyl acetate 10/1) to afford the product **D-3a**, which was mixture of (*E*)- and (*Z*)-isomer.

### Chiral HPLC separation of deuterated products (*R,R*)-(*E*)-**3a** and (*S,S*)-(*Z*)-**3a**

The “racemic” (*R,R*)-(*E*)-**3a** and (*S,S*)-(*Z*)-**3a** products were separated by a preparative OJ-H (25 cm × 0.46 cm) column, hexane/2-propanol =95/5, 8.0 mL/min, 214 nm. The absolute configuration of the product **3a** was determined by comparing the reported<sup>1</sup>.

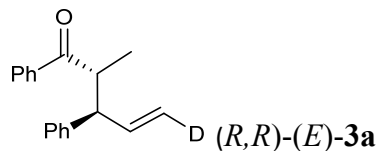

98% ee,  $[\alpha]_D^{26} = 44.6$  (*c* 0.7, CHCl<sub>3</sub>); <sup>1</sup>H NMR (400 MHz, CDCl<sub>3</sub>): δ 7.80-7.78 (m, 2H), 7.52-7.07 (m, 8H), 6.08-5.98 (m, 1H), 5.12 (d, *J* = 17.2 Hz, 1H), 3.97-3.91 (m, 1H), 3.72-3.68 (m, 1H), 1.20 (d, *J* = 6.8 Hz, 1H); <sup>13</sup>C NMR (101 MHz, CDCl<sub>3</sub>): 203.4, 142.8, 138.9, 137.0, 132.7, 128.5, 128.4, 128.0, 127.6, 126.3, 116.6 (t, *J* = 23.6 Hz), 53.0, 45.2, 16.5; MS (EI) *m/z* (rel): 251 (M<sup>+</sup>, 2), 236 (19), 118 (61), 105 (100), 92 (10), 77 (42), 51 (8); HRMS (EI) Calcd. for C<sub>18</sub>H<sub>17</sub>DO (M<sup>+</sup>): 251.1420; Found: 251.1419; HPLC: Chiralcel OJ-H, hexane/2-propanol =90/10, 0/7 mL/min, 214 nm, *t<sub>R</sub>* (major) = 9.10 min, *t<sub>R</sub>* (minor) = 10.2 min.

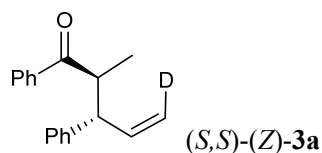

98% ee,  $[\alpha]_D^{26} = -37.7$  (*c* 0.8, CHCl<sub>3</sub>); <sup>1</sup>H NMR (400 MHz, CDCl<sub>3</sub>): δ 7.80-7.78 (m, 2H), 7.52-7.07 (m, 8H), 6.08-5.98 (m, 1H), 5.10 (d, *J* = 10.4 Hz, 1H), 3.97-3.91 (m, 1H), 3.72-3.68 (m, 1H), 1.20 (d, *J* = 6.8 Hz, 1H); <sup>13</sup>C NMR (101 MHz, CDCl<sub>3</sub>): 203.4, 142.8, 138.9, 137.0, 132.7, 128.5, 128.4, 128.0, 127.6, 126.3, 116.3 (t, *J* = 23.3 Hz), 53.0, 45.2, 16.5; MS (EI) *m/z* (rel): 251 (M<sup>+</sup>, 2), 236 (19), 118 (61), 105 (100), 92 (10), 77 (42), 51 (8); HRMS (EI) Calcd. for C<sub>18</sub>H<sub>17</sub>DO (M<sup>+</sup>): 251.1420; Found: 251.1427; HPLC: Chiralcel OJ-H, hexane/2-propanol =90/10, 0.7 mL/min, 214 nm, *t<sub>R</sub>* (minor) = 9.20 min, *t<sub>R</sub>* (major) = 10.2 min.

The absolute configuration of the product was determined to be (*S,S*) by comparing the reported HPLC traces of (*S,S*)-**3a**<sup>1</sup> {Chiralcel OJ-H Column 95:5 hexanes/2-propanol, 0.7 mL/min, 254 nm, *t<sub>R</sub>*(minor) = 9.9 min, *t<sub>R</sub>* (major) = 11.1 min. 98% ee, ( $[\alpha]_D^{25} = -56.9$ , *c* 1.41 in CHCl<sub>3</sub>) }.

**2. The reaction of  $\beta$ -alkenyl-ketone (*S*)-**1h** with (*S*)-(*Z*)-**5** catalyzed by  $[\text{Pd}(\eta^3\text{-C}_3\text{H}_5)\text{Cl}]_2/\text{S-IPr}$ .**

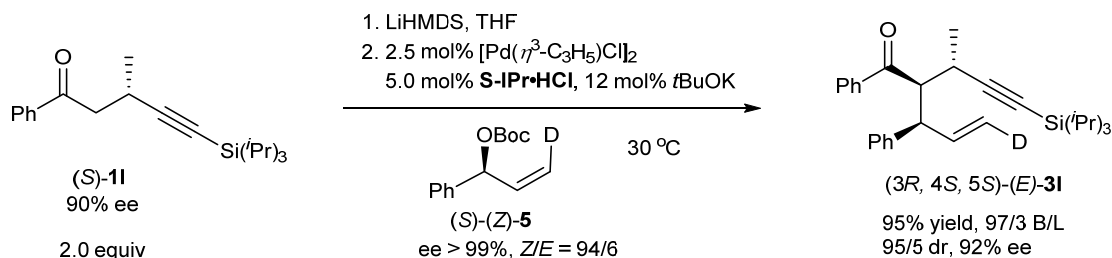

A dry schlenk tube was flame dried and flushed with Argon. Ketone (*S*)-**1I** (131.2 mg, 0.4 mmol) was and THF (2.0 mL) were added into the dry Schlenk tube. LHMDS (1.0 M in THF, 0.4 mL, 0.4 mmol) were added at 0 °C and stirred at room temperature for 30 min. In a separated flask,  $[\text{Pd}(\eta^3\text{-C}_3\text{H}_5)\text{Cl}]_2$  (1.9 mg, 0.005 mmol), S-IPr.HCl (4.4 mg, 0.006 mmol) and THF (1.0 mL) were added, followed by addition of *t*-BuOK (1.0 M in THF, 25  $\mu\text{L}$ , 0.025 mmol) at 0 °C. The resulting mixture was stirred at room temperature for 30 min, then added to the ketone solution. the substrates (*S*)-(*Z*)-**5** (47 mg, 0.2 mmol) and THF (1.0 mL) was then added and the mixture was stirred at 30 °C. After the reaction was complete, the reaction mixture was quenched by H<sub>2</sub>O (0.5 mL). The solution was dried (anhydrous Na<sub>2</sub>SO<sub>4</sub>) and then filtered through a 0.5 inch plug of silica gel (eluting with EtOAc) to remove the solid. The crude reaction mixture was concentrated under reduced pressure. CDCl<sub>3</sub> (0.7-0.8 mL) was added to dissolve the crude reaction mixture, and mesitylene (23  $\mu\text{L}$ ) was added as an internal standard. The diastereoselectivity was then determined by <sup>1</sup>H NMR spectroscopy. After this analysis, the crude reaction mixture was purified by flash column silica gel chromatography (eluting with petroleum ether/toluene 1/1) to yield the product (*3R, 4S, 5S*)-(*E*)-**3I** (85.1 mg, yield 95%; B/L: 97/3; *dr*: 95/5). ee = 92%,  $[\alpha]_{\text{D}}^{28} = 5.69$  (*c* 0.5, CHCl<sub>3</sub>); Yellow oil; <sup>1</sup>H NMR (400 MHz, CDCl<sub>3</sub>):  $\delta$  7.67 (d, *J* = 7.6 Hz, 2H), 7.42 (t, *J* = 7.6 Hz, 1H), 7.30-7.25 (m, 2H), 7.20-7.15 (m, 4H), 7.12-7.07 (m, 1H), 6.17 (dd, *J* = 16.8, 9.2 Hz, 1H), 5.20 (d, *J* = 16.8 Hz, 1H), 4.20 (dd, *J* = 9.2, 6.8 Hz, 1H), 3.96 (dd, *J* = 8.0, 6.4 Hz, 1H), 2.95-2.85 (m, 1H), 1.14 (d, *J* = 6.8 Hz, 3H), 1.10-1.00 (m, 21H); <sup>13</sup>C NMR (101 MHz, CDCl<sub>3</sub>): 202.1, 141.9, 139.1, 136.6, 132.6, 128.6, 128.3, 128.1, 127.9, 126.6, 117.4 (t, *J* = 24.0 Hz), 111.3, 83.0, 55.2, 51.2, 28.6, 18.6, 18.6, 18.3, 11.2; MS (EI) *m/z* (rel): 445 (M<sup>+</sup>, 0.58), 402 (10), 360 (9), 131 (6), 118 (100), 105 (12), 92 (6), 77 (12), 51 (2); IR

(film):  $\nu$  2940 (m), 2863 (m), 2161 (w), 1671 (m), 1449 (m), 1206 (m), 883 (m), 674 (s)  $\text{cm}^{-1}$ ; HRMS (EI) Calcd. for  $\text{C}_{30}\text{H}_{39}\text{DOSi}$  ( $\text{M}^+$ ): 445.2911; Found: 445.2907. HPLC (Agilent SDC-OJ,  $\text{CO}_2/i$ -Propanol = 95/5, 1.3 mL/min, 214 nm),  $t_{\text{R}}$  (major) = 4.58 min,  $t_{\text{R}}$ (minor) = 5.80 min.

### 3. The reaction of **1c** with **11** catalyzed by $[\text{Pd}(\eta^3\text{-C}_3\text{H}_5)\text{Cl}]_2/\text{S-IPr}$ .

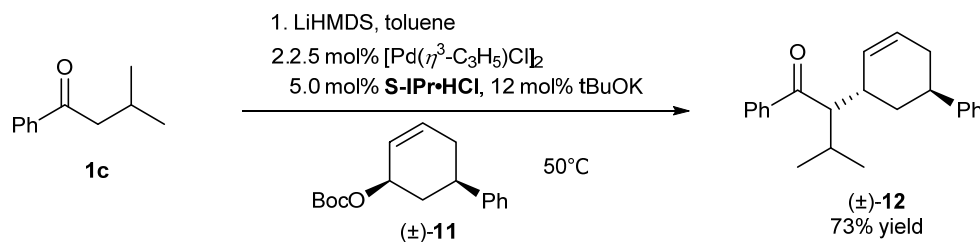

A dry schlenk tube was flame dried and flushed with Argon. Ketone **1c** (65 mg, 0.4 mmol) was and toluene (2.0 mL) were added into the dry Schlenk tube. LHMDS (1.0 M in THF, 0.4 mL, 0.4 mmol) were added at 0°C and stirred at room temperature for 30 min. In a separated flask,  $[\text{Pd}(\eta^3\text{-C}_3\text{H}_5)\text{Cl}]_2$  (1.9 mg, 0.005 mmol), S-IPr·HCl (4.4 mg, 0.006 mmol) and toluene (1.0 mL) were added, followed by addition of *t*-BuOK (1.0 M in THF, 25  $\mu\text{L}$ , 0.025 mmol) at 0°C. The resulting mixture was stirred at room temperature for 30 min, then added to the ketone solution. the substrates **11** (54 mg, 0.2 mmol) and toluene (1.0 mL) was then added and the mixture was stirred at 30 °C. After the reaction was complete, the reaction mixture was quenched by  $\text{H}_2\text{O}$  (0.5 mL). The solution was extracted with ethyl acetate and dried (anhydrous  $\text{Na}_2\text{SO}_4$ ), then concentrated under reduced pressure and purified by flash column silica gel chromatography (eluting with petroleum ether/ethyl acetate 10/1) to yield the product **12** (46.4 mg, yield 73%).  $^1\text{H}$  NMR (600 MHz,  $\text{CDCl}_3$ ):  $\delta$  8.01-7.93 (m, 2H), 7.59-7.51 (m, 1H), 7.49-7.43 (m, 2H), 7.31-7.23 (m, 2H), 7.21-7.16 (m, 1H), 7.14-7.08 (m, 2H), 5.83-5.73 (m, 1H), 5.73-5.64 (m, 1H), 3.51 (dd,  $J = 8.4, 6.7$  Hz, 1H), 2.90-2.81 (m, 1H), 2.80-2.72 (m, 1H), 2.36-2.28 (m, 1H), 2.23 (dq,  $J = 13.6, 6.8$  Hz, 1H), 2.19-2.12 (m, 1H), 1.92-1.86 (m, 2H), 0.91 (d,  $J = 6.7$  Hz, 3H), 0.89 (d,  $J = 6.9$  Hz, 3H).  $^{13}\text{C}$  NMR (101 MHz,  $\text{CDCl}_3$ )  $\delta$  204.54, 146.37, 139.82, 132.69, 128.96, 128.54, 128.29, 128.16, 127.31, 126.85, 126.00, 54.85, 36.07, 34.68, 33.32, 32.29, 28.67, 21.33, 18.76; IR: 2959, 1736, 1596, 1579, 1493, 1447  $\text{cm}^{-1}$ ; HRMS (ESI) Calcd for  $\text{C}_{23}\text{H}_{27}\text{O}$  ( $\text{M}+\text{H}^+$ ): 319.2062; Found 319.2058.

## Computational methods

All calculations were done with the Gaussian 09 program<sup>6</sup>. Gas phase geometries were optimized with the  $\omega$ B97XD functional<sup>7</sup> of the density functional theory (DFT). The SDD<sup>8</sup> basis set with Stuttgart/Dresden effective core potentials<sup>9,10</sup> (SDDAll) was employed for all atoms. Frequency analyses were performed at the same level of theory, to confirm that each optimized geometry is either an energy minimum (with no imaginary frequencies) or a transition state (with only one imaginary frequency), and to provide gas phase free energy corrections. Solvation free energies in toluene were computed at each optimized geometry with a larger basis set, def2-TZVP<sup>11,12</sup>, using the SMD solvation method<sup>13</sup>. To account for the different standard states in the gas-phase (1 atm, 298.15 K) and in solution (1 mol/liter, 298.15 K) when computing the thermal correction in solution, a correction of 1.89 kcal/mol is added to the total energy for each structure<sup>14,15</sup>. The final free energy for each structure,  $G_{\text{sol}}$ , comprises the SMD energy in solvent, the 1.89 kcal/mol thermal energy correction for the standard state in solution and the free energy correction of the gas phase. Reported energies in this study are relative free energies  $\Delta G_{\text{sol}}$ . Cartesian coordinates and absolute energies of all calculated structure can be found in a separate file called Supplemental Data 1.

## DFT results and discussions

It is proposed (Supplementary **Figure 67**) that ketone **1b** is deprotonated by LiHMDS to generate **lithium enolate**, and **2a** reacts with NHC and Pd(0) to give the **allyl-Pd complex**. Then, lithium enolate and allyl-Pd complex can react to yield the branched product via either an outer-sphere or inner-sphere mechanism.

It should be noted that the structure of lithium enolate generated in the reaction condition is not as simple as what we drew in the above figure. Organolithium compounds usually exist in aggregate forms, such as dimer, trimer, tetramer and so on in solid-state<sup>16</sup>. Solvent and external ligands may change the aggregate form of these compounds. For example, LiHMDS in THF solvent has a dimer structure<sup>17</sup>. In the current reaction conditions, we have no knowledge of the exact structure of the lithium enolate. However, it is reasonable to assume that lithium enolate exists as dimers, possibly with two external amine ligands for each dimer (Supplementary **Figure 68**). It has been reported that under similar conditions, Z-type enolate is formed



dominantly<sup>18,19</sup>. Our experiment also showed that the Z-isomer is indeed the major product. We used the dimer structure of Z-enolate without external amine ligands in our calculations.

In addition to the key structures shown in Figure 6 of the manuscript, we also calculated intermediates and transition structures containing  $\eta^1$ -allyl-Pd complex (Supplementary **Figure 69**) and E-enolate (Supplementary **Figure 71**).

The following section presents the analysis and calculations on possible conformations of the transition state that leads to branched product via an inner-sphere pathway (TS-inner-branched in Figure 6 of the manuscript).

In order to model the seven-membered ring transition state of this C-C bond-forming step, we consulted a conformational study on saturated seven-membered rings<sup>20</sup>. In cycloheptane (Supplementary **Figure 70**), the *chair* and *boat* conformations are not stable (not energy minimum) because of the repulsion between the two eclipsing CH<sub>2</sub> groups (marked by red arrows); instead, they are transition states connecting, respectively, a pair of *twist-chair* and *twist-boat* conformations.

To construct the structure of TS-inner-branched (Figure 6 of the manuscript), one needs to replace two adjacent CH<sub>2</sub> groups in cycloheptane with the –O– and –Pd(NHC)– groups, and also to add necessary substituents. We started with the *chair* and *boat* conformations of cycloheptane. In order to eliminate the repulsion between the two eclipsing CH<sub>2</sub> groups, we replaced one of them with the –O– and an adjacent CH<sub>2</sub> group with the –Pd(NHC)– group. Then we added two phenyls and one ethyl to the seven-membered ring at proper positions to obtain transition state TS-inner-branched for substrate **1b**. Note that if one starts with the *twist-chair* and *twist-boat* conformations, the same structures will be obtained after geometry optimization.

Supplementary **Figure 71** illustrates this substitution process and shows the resulting transition state structures. To show more clearly the difference between the two conformations, in the drawings of both conformations in Supplementary **Figure 71**, we placed the phenylallyl group in the front with the same orientation and the enolate in the back. Since enantioselectivity is not involved in the reaction using achiral NHC ligands, we only considered the *si* face of phenylallyl being attacked by enolate in our calculations.

A total of four transition state structures can be constructed when both the *E/Z* isomers of enolate are considered. As can be seen in Supplementary **Figure 71**, the difference between the *chair* and *boat* transition states with the same enolate configuration (**TS1** vs **TS3**, both with *E*-enolate) is that, in **TS1**, it is the *re* face of enolate that attacks the phenyl allyl, whereas in **TS3**, the enolate attacks with its *si* face.

We also considered transition state structures generated by substitution of –O– and –Pd(NHC)– for two adjacent CH<sub>2</sub> groups in cycloheptane at different positions. This leads to four more transition states, **TS5** to **TS8**. Their structures and energies are given in the Absolute energies and coordinates section later in this document. Calculations show that these transition states are at least 3.2 kcal/mol higher than **TS2**.

Based on the transition state structures for **1b**, we added a methyl group to the β position of the enolate, thus obtaining the transition state structures for **1c**. These structures and their relative energies are shown in Supplementary **Figure 72**. We also considered the three conformers arising from the rotation of the C(α)-C(β) bond in the enolate.

Among the three *chair* transition states for **1c**, **TS2a-Me** has the lowest energy although it suffers from the 1,3-diaxial strain between one methyl at the β position of enolate and the phenyl group of phenylallyl. **TS2b-Me** suffers from the repulsion between one methyl at the β position of enolate and the bulky substituent on NHC, which is not obvious in this schematic drawing. **TS2b-Me** is computed to be 1.8 kcal/mol higher than **TS2a-Me**, indicating that the repulsion between the methyl at the β position of enolate and NHC is stronger than the 1,3-diaxial strain. **TS2c-Me** suffers from both, and thus has the highest energy. Among the three *boat* transition states, **TS4a-Me** is the lowest energy one. **TS4c-Me** is computed to be 4.6 kcal/mol higher than **TS4a-Me** due to the repulsion between one methyl at the β position of enolate and the bulky substituent on NHC, which is also not obvious in this schematic drawing.

Next, based on the transition state structures for **1b**, possible transition state structures for **1k** were constructed by adding a phenyl group to the β position of the enolate (Supplementary **Figure 73**). In each of these transition states, only one conformation, in which the hydrogen at β position is pointing to NHC, were considered. The boat transition state **TS4a-Ph** is predicted to

be the lowest energy transition state; the product generated via **TS4a-Ph** has the same stereo configuration as the one produced in experiments.

## Supplementary References

1. Zheng, W.-H., Zheng, B.-H., Zhang, Y. & Hou, X.-L. Highly Regio-, Diastereo-, and Enantioselective Pd-Catalyzed Allylic Alkylation of Acyclic Ketone Enolates with Monosubstituted Allyl Substrates. *J. Am. Chem. Soc.* **129**, 7718-7719 (2007).
2. Endo, K., Ogawa, M. & Shibata, T. Multinuclear catalyst for copper-catalyzed asymmetric conjugate addition of organozinc reagents. *Angew. Chem., Int. Ed.* **49**, 2410-2413 (2010).
3. Nishimura, T., Guo, X. -X., Uchiyama, N., Katoh, T. & Hayashi, T. Steric tuning of silylacetylenes and chiral phosphine ligands for Rhodium-catalyzed asymmetric conjugate alkynylation of enones. *J. Am. Chem. Soc.* **130**, 1576-1577 (2008).
4. Liao, S. P. & Collum, D. B. Lithium diisopropylamide-mediated lithiations of imines: insights into highly structure-dependent rates and selectivities. *J. Am. Chem. Soc.* **125**, 15114-15127 (2003).
5. Chen, J.-P., Peng, Q., Lei, B.-L., Hou, X.-L. & Wu, Y.-D. Chemo- and regioselectivity-tunable Pd-catalyzed allylic alkylation of imines. *J. Am. Chem. Soc.* **133**, 14180-14183 (2011).
6. Gaussian 09, Revision D.01, M. J. Frisch, G. W. Trucks, H. B. Schlegel, G. E. Scuseria, M. A. Robb, J. R. Cheeseman, G. Scalmani, V. Barone, B. Mennucci, G. A. Petersson, H. Nakatsuji, M. Caricato, X. Li, H. P. Hratchian, A. F. Izmaylov, J. Bloino, G. Zheng, J. L. Sonnenberg, M. Hada, M. Ehara, K. Toyota, R. Fukuda, J. Hasegawa, M. Ishida, T. Nakajima, Y. Honda, O. Kitao, H. Nakai, T. Vreven, J. A., Jr. Montgomery, J. E. Peralta, F. Ogliaro, M. Bearpark, J. J. Heyd, E. Brothers, K. N. Kudin, V. N. Staroverov, R. Kobayashi, J. Normand, K. Raghavachari, A. Rendell, J. C. Burant, S. S. Iyengar, J. Tomasi, M. Cossi, N. Rega, J. M. Millam, M. Klene, J. E. Knox, J. B. Cross, V. Bakken, C. Adamo, J. Jaramillo, R. Gomperts, R. E. Stratmann, O. Yazyev, A. J. Austin, R. Cammi, C. Pomelli, J. W. Ochterski, R. L. Martin, K. Morokuma, V. G. Zakrzewski, G. A. Voth, P. Salvador, J. J.

- Dannenberg, S. Dapprich, A. D. Daniels, Ö. Farkas, J. B. Foresman, J. V. Ortiz, J. Cioslowski, Fox, D. J. Gaussian, Inc., Wallingford CT, 2009.
7. Chai, J.-D. & Head-Gordon, M. Long-range corrected hybrid density functionals with damped atom–atom dispersion corrections. *Phys. Chem. Chem. Phys.* **10**, 6615-6620 (2008).
  8. Dunning Jr. T. H., Hay, P. J., in *Modern Theoretical Chemistry*, Ed. Schaefer, H. F. III, Vol. 3 (Plenum, New York, 1977) 1-28.
  9. Igel-Mann, G., Stoll, H. & H. Preuss, “Pseudopotentials for main group elements (IIIA through VIIA),” *Mol. Phys.* **65**, 1321-1328 (1988).
  10. Andrae, D., Haeussermann, U., Dolg, M., Stoll, H. & Preuss, H. Energy-adjusted ab initio pseudopotentials for the 2nd and 3rd row transition-elements. *Theor. Chem. Acc.*, **77**, 123-141 (1990).
  11. Weigend, F. & Ahlrichs, R. Balanced basis sets of split valence, triple zeta valence and quadruple zeta valence quality for H to Rn: Design and assessment of accuracy. *Phys. Chem. Chem. Phys.* **7**, 3297-3305 (2005);
  12. Weigend, F. Accurate Coulomb-fitting basis sets for H to Rn. *Phys. Chem. Chem. Phys.* **8**, 1057-1065 (2006).
  13. Marenich, A. V., Cramer, C. J. & Truhlar, D. G. Universal Solvation Model Based on Solute Electron Density and on a Continuum Model of the Solvent Defined by the Bulk Dielectric Constant and Atomic Surface Tensions. *J. Phys. Chem. B*, **113**, 6378-6396 (2009).
  14. Harvey, J. N. Ab initio transition state theory for polar reactions in solution. *Faraday Discuss.* **145**, 487–505 (2010).
  15. 1. General, I. J. A Note on the Standard State’s Binding Free Energy. *J. Chem. Theory Comput.* **6**, 2520-2524 (2010).

16. I. Stey, T. & Stalke, D. Lead structures in lithium organic chemistry. *PATAI'S Chemistry of Functional Groups* (John Wiley & Sons, Ltd, 2009).
17. Lucht, B. L. & Collum, D. B. Ethereal Solvation of Lithium Hexamethyldisilazide: Unexpected Relationships of Solvation Number, Solvation Energy, and Aggregation State. *J. Am. Chem. Soc.* **117**, 9863–9874 (1995).
18. Heathcock, C. H. et al. Acyclic Stereoselection. 7. Stereoselective Synthesis of 2-Alkyl-3-hydroxy Carbonyl Compounds by Aldol. *J. Org. Chem.* **45**, 1066–1081 (1980).
19. Xie, L., Isenberger, K. M., Held, G. & Dahl, L. M. Formation: Steric vs Electronic Effects. **62**, 7516–7519 (1997).
20. Entrena, A. Rules for predicting the conformational behavior of saturated seven-membered heterocycles. *Arkivoc* **2005**, 88–108 (2005).
