# Supplementary material for: Palladium/N-heterocyclic carbene catalysed regio and diastereoselective reaction of ketones with allyl reagents via inner-sphere mechanism
Source: PubMed Central journal article supplement (PMC4906412; doi:10.1038/ncomms11806), 2016-06-10
Supplement: ncomms11806-s2.pdf [file ncomms11806-s2.pdf]

## Energies and coordinates of calculated structures

Energies are in hartree; cartesian coordinates are in angstrom. Pictures are generated by CYLview [Legault, C. Y.mCYLview, 1.0b. Université de Sherbrooke. <http://www.cylview.org> (2009)]. Carbon and hydrogen atoms are in grey, oxygen in red, nitrogen in blue, palladium in turquoise. Some atoms of the bulky substituent on NHC are omitted for clarity.

| lithium enolate                                                                   |               |               |               | <sup>t</sup> BuOLi                                                                 |               |               |               |
|-----------------------------------------------------------------------------------|---------------|---------------|---------------|------------------------------------------------------------------------------------|---------------|---------------|---------------|
| 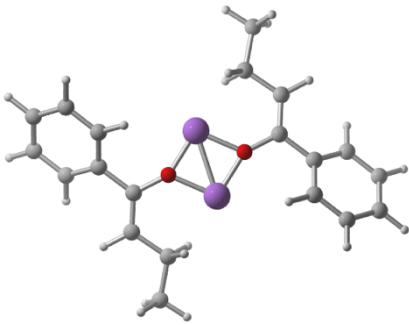 |               |               |               |  |               |               |               |
| Gas phase energy= -159.313305075                                                  |               |               |               | Gas phase energy= -124.107569174                                                   |               |               |               |
| Gas phase free energy correction= 0.322940                                        |               |               |               | Gas phase free energy correction= 0.269379                                         |               |               |               |
| SMD energy= -941.086062905                                                        |               |               |               | SMD energy= -711.247903459                                                         |               |               |               |
| C                                                                                 | 2.5663510000  | 2.3464830000  | -0.1248540000 | C                                                                                  | -1.4451320000 | 2.0087180000  | -0.1212910000 |
| C                                                                                 | 2.4985070000  | 1.0051220000  | 0.0252230000  | C                                                                                  | -1.3198400000 | 0.6631750000  | -0.0831700000 |
| O                                                                                 | 1.3012720000  | 0.3909920000  | 0.1745420000  | O                                                                                  | -0.0965060000 | 0.0859000000  | -0.1166550000 |
| C                                                                                 | 3.6936090000  | 0.1160610000  | 0.0529590000  | C                                                                                  | -2.4818890000 | -0.2678960000 | -0.0263240000 |
| C                                                                                 | 3.6708040000  | -1.0603170000 | 0.8178220000  | C                                                                                  | -2.3941370000 | -1.5296930000 | -0.6335550000 |
| C                                                                                 | 4.8485960000  | 0.4120960000  | -0.6872360000 | C                                                                                  | -3.6696690000 | 0.0765620000  | 0.6370650000  |
| C                                                                                 | 4.7755640000  | -1.9116670000 | 0.8539940000  | C                                                                                  | -3.4691750000 | -2.4180230000 | -0.5942070000 |
| H                                                                                 | 2.7901560000  | -1.2872180000 | 1.4120250000  | H                                                                                  | -1.4847380000 | -1.7963450000 | -1.1632900000 |
| C                                                                                 | 5.9539250000  | -0.4382120000 | -0.6510850000 | C                                                                                  | -4.7449090000 | -0.8116240000 | 0.6774620000  |
| H                                                                                 | 4.8690400000  | 1.3002390000  | -1.3102220000 | H                                                                                  | -3.7403020000 | 1.0353060000  | 1.1402330000  |
| C                                                                                 | 5.9223800000  | -1.6036320000 | 0.1185570000  | C                                                                                  | -4.6496490000 | -2.0622110000 | 0.0622710000  |
| H                                                                                 | 4.7454160000  | -2.8112960000 | 1.4604850000  | H                                                                                  | -3.3884280000 | -3.3850820000 | -1.0803210000 |
| H                                                                                 | 6.8372400000  | -0.1966790000 | -1.2330150000 | H                                                                                  | -5.6542040000 | -0.5321370000 | 1.1993850000  |
| H                                                                                 | 6.7809140000  | -2.2662630000 | 0.1421890000  | H                                                                                  | -5.4849460000 | -2.7535140000 | 0.0970350000  |
| H                                                                                 | 3.5263470000  | 2.8494930000  | -0.1942170000 | H                                                                                  | -2.4258890000 | 2.4740400000  | -0.1524320000 |
| C                                                                                 | 1.3185830000  | 3.1906420000  | -0.1584510000 | C                                                                                  | -0.2334580000 | 2.9033620000  | -0.1672040000 |
| C                                                                                 | 1.5968610000  | 4.6843840000  | -0.3615650000 | C                                                                                  | -0.5759370000 | 4.3974970000  | -0.1464480000 |
| H                                                                                 | 0.6508730000  | 2.8481960000  | -0.9745180000 | H                                                                                  | 0.4290980000  | 2.6852720000  | 0.6940290000  |
| H                                                                                 | 0.7529280000  | 3.0671220000  | 0.7874480000  | H                                                                                  | 0.3570600000  | 2.6960590000  | -1.0833770000 |
| H                                                                                 | 0.6709400000  | 5.2685020000  | -0.3695420000 | H                                                                                  | 0.3258250000  | 5.0176020000  | -0.1803110000 |
| H                                                                                 | 2.1133130000  | 4.8519130000  | -1.3125170000 | H                                                                                  | -1.1290470000 | 4.6504520000  | 0.7642060000  |
| H                                                                                 | 2.2354460000  | 5.0675870000  | 0.4412520000  | H                                                                                  | -1.2024070000 | 4.6599120000  | -1.0055040000 |
| C                                                                                 | -2.5663930000 | -2.3464890000 | -0.1247390000 | O                                                                                  | 2.5891180000  | -0.5011570000 | 0.0630090000  |
| C                                                                                 | -2.4984680000 | -1.0051040000 | 0.0250780000  | Li                                                                                 | 1.5270390000  | 0.8928360000  | -0.2327880000 |
| O                                                                                 | -1.3011980000 | -0.3909570000 | 0.1739570000  | Li                                                                                 | 1.0022900000  | -1.2605180000 | 0.2045630000  |
| C                                                                                 | -3.6935680000 | -0.1160400000 | 0.0529200000  | C                                                                                  | 3.9857190000  | -0.7700500000 | 0.1010680000  |
| C                                                                                 | -3.6708160000 | 1.0602100000  | 0.8179810000  | C                                                                                  | 4.4434010000  | -0.8441160000 | 1.5678600000  |
| C                                                                                 | -4.8484740000 | -0.4119370000 | -0.6874440000 | C                                                                                  | 4.2571960000  | -2.1084840000 | -0.6072140000 |
| C                                                                                 | -4.7755800000 | 1.9115450000  | 0.8542250000  | C                                                                                  | 4.7266050000  | 0.3665710000  | -0.6254110000 |
| H                                                                                 | -2.7902190000 | 1.2870280000  | 1.4123000000  | H                                                                                  | 4.2219750000  | 0.1025060000  | 2.0727300000  |
| C                                                                                 | -5.9538120000 | 0.4383650000  | -0.6512340000 | H                                                                                  | 3.8988720000  | -1.6417420000 | 2.0859430000  |
| H                                                                                 | -4.8688340000 | -1.2999710000 | -1.3105920000 | H                                                                                  | 5.5182140000  | -1.0441950000 | 1.6523240000  |
| C                                                                                 | -5.9223350000 | 1.6036360000  | 0.1186310000  | H                                                                                  | 3.8976210000  | -2.0580590000 | -1.6408150000 |
| H                                                                                 | -4.7454900000 | 2.8110560000  | 1.4608920000  | H                                                                                  | 5.3247160000  | -2.3577320000 | -0.6180450000 |

|    |               |               |               |   |              |               |               |
|----|---------------|---------------|---------------|---|--------------|---------------|---------------|
| H  | -6.8370730000 | 0.1969470000  | -1.2332930000 | H | 3.7222090000 | -2.9162100000 | -0.0923890000 |
| H  | -6.7808680000 | 2.2662680000  | 0.1423030000  | H | 5.8117360000 | 0.2121110000  | -0.6352030000 |
| H  | -3.5264370000 | -2.8494590000 | -0.1937290000 | H | 4.3756920000 | 0.4326120000  | -1.6619480000 |
| C  | -1.3186720000 | -3.1907050000 | -0.1585220000 | H | 4.5232960000 | 1.3215190000  | -0.1238080000 |
| C  | -1.5970820000 | -4.6844720000 | -0.3613290000 |   |              |               |               |
| H  | -0.6511840000 | -2.8484240000 | -0.9748430000 |   |              |               |               |
| H  | -0.7527220000 | -3.0670640000 | 0.7871720000  |   |              |               |               |
| H  | -0.6711880000 | -5.2686280000 | -0.3695120000 |   |              |               |               |
| H  | -2.1138490000 | -4.8521070000 | -1.3120910000 |   |              |               |               |
| H  | -2.2354230000 | -5.0675320000 | 0.4417500000  |   |              |               |               |
| Li | -0.3610980000 | 1.1127270000  | 0.1484760000  |   |              |               |               |
| Li | 0.3611620000  | -1.1126600000 | 0.1470910000  |   |              |               |               |

| allyl-Pd complex |  |  |  | allyl-Pd complex-2 |  |  |  |
|------------------|--|--|--|--------------------|--|--|--|
|------------------|--|--|--|--------------------|--|--|--|

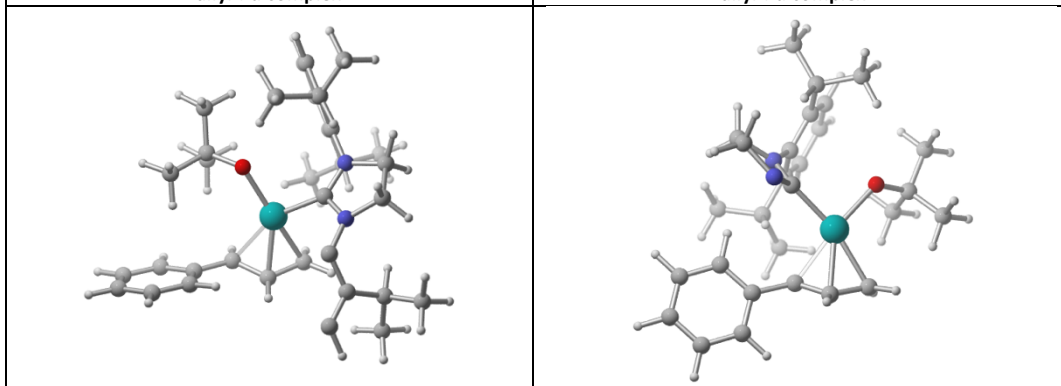

|                                            |  |  |  |                                            |  |  |  |
|--------------------------------------------|--|--|--|--------------------------------------------|--|--|--|
| Gas phase energy= -424.354529979           |  |  |  | Gas phase energy= -424.344276892           |  |  |  |
| Gas phase free energy correction= 0.816094 |  |  |  | Gas phase free energy correction= 0.819843 |  |  |  |
| SMD energy= -1870.81779572                 |  |  |  | SMD energy= -1870.80621391                 |  |  |  |

|    |               |               |               |    |               |               |               |
|----|---------------|---------------|---------------|----|---------------|---------------|---------------|
| C  | 2.2097870000  | -1.3095970000 | -1.7952630000 | C  | 0.3806730000  | 0.4993770000  | -3.5232480000 |
| H  | 1.7206470000  | -1.8542430000 | -2.6034430000 | H  | -0.2052630000 | 1.3702940000  | -3.8087640000 |
| C  | 2.1800210000  | 0.1023910000  | -1.8540370000 | C  | 1.5496130000  | 0.6663860000  | -2.7397280000 |
| C  | 1.0406050000  | 0.7492740000  | -2.3928470000 | C  | 1.5242730000  | 1.6056100000  | -1.6862280000 |
| H  | 2.9100740000  | 0.6897360000  | -1.3027330000 | H  | 2.3615310000  | -0.0551180000 | -2.7904100000 |
| H  | 0.4991830000  | 0.2932320000  | -3.2206920000 | H  | 0.8198150000  | 2.4350960000  | -1.8033470000 |
| Pd | 0.4078250000  | -0.4102760000 | -0.7143090000 | Pd | -0.1080930000 | 0.1490350000  | -1.4089440000 |
| C  | 3.2595940000  | -2.0524320000 | -1.0709300000 | C  | 0.7338750000  | -1.0021430000 | 2.6885980000  |
| C  | 3.5882220000  | -3.3592560000 | -1.4635220000 | C  | -0.1463010000 | 0.2286820000  | 2.9381530000  |
| C  | 3.9183350000  | -1.5042550000 | 0.0443840000  | H  | 0.2656920000  | -1.9362320000 | 3.0163670000  |
| C  | 4.5402550000  | -4.0996180000 | -0.7622460000 | H  | -0.9440670000 | 0.0518380000  | 3.6593630000  |
| H  | 3.0807400000  | -3.8009730000 | -2.3165950000 | C  | -0.0094270000 | -0.1408410000 | 0.6154530000  |
| C  | 4.8726390000  | -2.2419820000 | 0.7402360000  | N  | 0.8631760000  | -0.9931260000 | 1.2128570000  |
| H  | 3.6505920000  | -0.5124190000 | 0.3976930000  | N  | -0.6936820000 | 0.5019210000  | 1.5913280000  |
| C  | 5.1871260000  | -3.5450800000 | 0.3433650000  | C  | -1.9602040000 | 1.1676030000  | 1.4286300000  |
| H  | 4.7714670000  | -5.1123520000 | -1.0753900000 | C  | -2.0204440000 | 2.4949820000  | 0.9686870000  |
| H  | 5.3583640000  | -1.8065720000 | 1.6074490000  | C  | -3.1225490000 | 0.4496580000  | 1.7718840000  |
| H  | 5.9205320000  | -4.1230890000 | 0.8953440000  | C  | -3.2757190000 | 3.1030490000  | 0.8650380000  |
| H  | 0.9740520000  | 1.8287980000  | -2.3458190000 | C  | -4.3563960000 | 1.0977980000  | 1.6534050000  |
| C  | -1.4566010000 | 3.1824290000  | 0.7792180000  | C  | -4.4358790000 | 2.4120540000  | 1.2039020000  |
| C  | -2.6987960000 | 2.4854270000  | 0.2065520000  | H  | -3.3492390000 | 4.1231010000  | 0.5044350000  |
| H  | -1.4734450000 | 3.2442520000  | 1.8731710000  | H  | -5.2665780000 | 0.5627580000  | 1.9064780000  |
| H  | -3.5368110000 | 2.4497090000  | 0.9043280000  | C  | 1.5775490000  | -2.0374180000 | 0.5224370000  |
| C  | -0.8448280000 | 1.0666230000  | -0.0763110000 | C  | 0.8441220000  | -3.0593590000 | -0.1266750000 |
| N  | -0.3739830000 | 2.2723790000  | 0.3428030000  | C  | 2.9870480000  | -2.0563730000 | 0.5546580000  |
| N  | -2.1865070000 | 1.1274520000  | -0.0728760000 | C  | 1.5621470000  | -4.0519640000 | -0.8039470000 |
| C  | -3.0742120000 | 0.0111800000  | -0.2158780000 | C  | 3.6560840000  | -3.0847070000 | -0.1204210000 |
| C  | -3.3480590000 | -0.5184030000 | -1.4852630000 | C  | 2.9530960000  | -4.0646240000 | -0.8107910000 |
| C  | -3.6486220000 | -0.5104730000 | 0.9580320000  | H  | 1.0216600000  | -4.8355520000 | -1.3219020000 |
| C  | -4.2281450000 | -1.6048460000 | -1.5631000000 | H  | 4.7403600000  | -3.1166910000 | -0.1050290000 |
| C  | -4.5304530000 | -1.5862620000 | 0.8325860000  | C  | -0.6719080000 | -3.1870490000 | -0.0304030000 |
| C  | -4.8162150000 | -2.1324020000 | -0.4172290000 | H  | -1.1187910000 | -2.2002590000 | 0.1120250000  |

|   |               |               |               |   |               |               |               |
|---|---------------|---------------|---------------|---|---------------|---------------|---------------|
| H | -4.4550990000 | -2.0413150000 | -2.5308930000 | C | 3.8067880000  | -1.0472270000 | 1.3450300000  |
| H | -4.9765990000 | -2.0202780000 | 1.7217430000  | H | 3.1567120000  | -0.2018780000 | 1.5925170000  |
| C | 1.0072860000  | 2.5030440000  | 0.6627240000  | C | -3.0844230000 | -0.9846010000 | 2.2890980000  |
| C | 1.5954670000  | 1.7745940000  | 1.7218150000  | H | -2.0485050000 | -1.3382270000 | 2.2601050000  |
| C | 1.7467230000  | 3.4348320000  | -0.0942270000 | C | -0.7561720000 | 3.2573180000  | 0.6129440000  |
| C | 2.9590120000  | 1.9701720000  | 1.9706300000  | H | -0.0156630000 | 2.5137820000  | 0.3183490000  |
| C | 3.1045790000  | 3.6023520000  | 0.2011770000  | H | -5.4019990000 | 2.8960800000  | 1.1098760000  |
| C | 3.7102840000  | 2.8668140000  | 1.2154770000  | H | 3.4865310000  | -4.8477290000 | -1.3393060000 |
| H | 3.4373510000  | 1.4160600000  | 2.7703770000  | C | -0.9299430000 | 4.2012930000  | -0.5849560000 |
| H | 3.6958750000  | 4.3089270000  | -0.3716500000 | H | 0.0468570000  | 4.5957490000  | -0.8884490000 |
| C | 0.7894860000  | 0.8524710000  | 2.6306380000  | H | -1.5659430000 | 5.0607890000  | -0.3445320000 |
| H | -0.1072160000 | 0.5217760000  | 2.1020610000  | H | -1.3737460000 | 3.6736920000  | -1.4364230000 |
| C | 1.1024010000  | 4.2881530000  | -1.1796530000 | C | -0.2047840000 | 4.0116680000  | 1.8366850000  |
| H | 0.1510680000  | 3.8138300000  | -1.4525840000 | H | -0.0313830000 | 3.3285090000  | 2.6758940000  |
| C | -3.2987090000 | 0.0354940000  | 2.3373630000  | H | -0.9135550000 | 4.7786030000  | 2.1704180000  |
| H | -2.6718080000 | 0.9240550000  | 2.2069520000  | H | 0.7451620000  | 4.4993830000  | 1.5896960000  |
| C | -2.7419170000 | 0.0635030000  | -2.7541390000 | C | 4.9869510000  | -0.4868940000 | 0.5374320000  |
| H | -2.0026510000 | 0.8164600000  | -2.4608010000 | H | 5.7354560000  | -1.2587210000 | 0.3266760000  |
| H | -5.4935340000 | -2.9760730000 | -0.4959130000 | H | 5.4824490000  | 0.3094120000  | 1.1007130000  |
| H | 4.7664920000  | 2.9992400000  | 1.4238800000  | H | 4.6467110000  | -0.0656430000 | -0.4120130000 |
| C | -2.0021070000 | -1.0055240000 | -3.5756240000 | C | 4.3228020000  | -1.6795070000 | 2.6552170000  |
| H | -1.5166760000 | -0.5463900000 | -4.4448780000 | H | 3.5137460000  | -2.1230190000 | 3.2453570000  |
| H | -2.6900550000 | -1.7733050000 | -3.9478350000 | H | 4.8313630000  | -0.9273190000 | 3.2690150000  |
| H | -1.2369960000 | -1.4998200000 | -2.9680030000 | H | 5.0403730000  | -2.4783200000 | 2.4342810000  |
| C | -3.8197630000 | 0.7666930000  | -3.6013170000 | C | -1.0270850000 | -4.0858890000 | 1.1723870000  |
| H | -4.3273220000 | 1.5476460000  | -3.0244580000 | H | -0.6713510000 | -3.6610740000 | 2.1178570000  |
| H | -4.5791500000 | 0.0521910000  | -3.9396250000 | H | -0.5712900000 | -5.0771220000 | 1.0596190000  |
| H | -3.3696980000 | 1.2280720000  | -4.4877180000 | H | -2.1117060000 | -4.2143250000 | 1.2417550000  |
| C | 1.9580790000  | 4.3947190000  | -2.4557780000 | C | -1.3159720000 | -3.7328010000 | -1.3124260000 |
| H | 2.8533760000  | 5.0025580000  | -2.2849280000 | H | -2.4010920000 | -3.6118140000 | -1.2447320000 |
| H | 1.3827220000  | 4.8784060000  | -3.2524960000 | H | -1.1016450000 | -4.7977980000 | -1.4672170000 |
| H | 2.2844910000  | 3.4141240000  | -2.8145760000 | H | -0.9823260000 | -3.1603560000 | -2.1809380000 |
| C | 0.8077790000  | 5.7048950000  | -0.6413490000 | C | -3.5751870000 | -1.0544160000 | 3.7489700000  |
| H | 0.2275840000  | 5.6787750000  | 0.2865400000  | H | -3.0348560000 | -0.3540760000 | 4.3960560000  |
| H | 0.2551440000  | 6.2931260000  | -1.3824460000 | H | -3.4426570000 | -2.0667750000 | 4.1466740000  |
| H | 1.7468780000  | 6.2267380000  | -0.4238030000 | H | -4.6407020000 | -0.8059090000 | 3.8132590000  |
| C | 0.3505790000  | 1.6235940000  | 3.8921890000  | C | -3.8828350000 | -1.9465000000 | 1.3972220000  |
| H | -0.2217430000 | 2.5232080000  | 3.6381630000  | H | -3.4294610000 | -1.9924620000 | 0.4045050000  |
| H | 1.2230190000  | 1.9371640000  | 4.4781030000  | H | -4.9249820000 | -1.6271520000 | 1.2863500000  |
| H | -0.2750530000 | 0.9840810000  | 4.5243460000  | H | -3.8871030000 | -2.9483750000 | 1.8408550000  |
| C | 1.5380670000  | -0.4326670000 | 3.0080440000  | O | -1.9880550000 | -0.6926590000 | -1.4055180000 |
| H | 0.8558320000  | -1.1017320000 | 3.5411350000  | H | 0.4385680000  | 1.0914570000  | 3.2760720000  |
| H | 2.3978720000  | -0.2367150000 | 3.6606750000  | H | 1.7092500000  | -0.9168320000 | 3.1661590000  |
| H | 1.8680160000  | -0.9640650000 | 2.1125210000  | C | -3.0002290000 | -0.3227690000 | -2.3653570000 |
| C | -4.5514430000 | 0.4622060000  | 3.1223760000  | C | -3.0985330000 | 1.2078870000  | -2.5002340000 |
| H | -5.1574380000 | 1.1781040000  | 2.5549350000  | C | -2.7307900000 | -0.9780910000 | -3.7304890000 |
| H | -4.2615790000 | 0.9275050000  | 4.0710600000  | C | -4.3410130000 | -0.8464050000 | -1.8229760000 |
| H | -5.1853230000 | -0.4002690000 | 3.3570510000  | H | -3.2740640000 | 1.6469610000  | -1.5128620000 |
| C | -2.4446870000 | -0.9704080000 | 3.1255650000  | H | -2.1673550000 | 1.6222290000  | -2.9000370000 |
| H | -1.5594050000 | -1.2404730000 | 2.5374820000  | H | -3.9184570000 | 1.5000540000  | -3.1686620000 |
| H | -3.0101430000 | -1.8860690000 | 3.3347210000  | H | -2.6534700000 | -2.0628490000 | -3.6053270000 |
| H | -2.1390280000 | -0.5341230000 | 4.0845250000  | H | -3.5382250000 | -0.7634220000 | -4.4417720000 |
| O | -0.3582750000 | -1.7253330000 | 0.6688320000  | H | -1.7936670000 | -0.6141410000 | -4.1555790000 |
| H | -3.0427460000 | 2.9428570000  | -0.7280730000 | H | -5.1586770000 | -0.6257910000 | -2.5204000000 |
| H | -1.3155200000 | 4.1841920000  | 0.3745040000  | H | -4.2896720000 | -1.9303780000 | -1.6792360000 |
| C | -0.2783480000 | -3.1636550000 | 0.5780740000  | H | -4.5618740000 | -0.3731260000 | -0.8621410000 |
| C | -0.3938310000 | -3.6367330000 | -0.8823760000 | C | 2.7153300000  | 1.9899180000  | -0.8756420000 |
| C | 1.0321400000  | -3.6599170000 | 1.2098240000  | C | 3.9088660000  | 2.3302780000  | -1.5348260000 |
| C | -1.4710360000 | -3.7378790000 | 1.3633810000  | C | 2.6504390000  | 2.1701280000  | 0.5135480000  |
| H | -1.3121530000 | -3.2287500000 | -1.3205330000 | C | 4.9948030000  | 2.8517600000  | -0.8298580000 |
| H | 0.4623500000  | -3.2920450000 | -1.4686220000 | H | 3.9700550000  | 2.2097790000  | -2.6122330000 |
| H | -0.4311580000 | -4.7314890000 | -0.9452030000 | C | 3.7315000000  | 2.6993880000  | 1.2185200000  |
| H | 1.0599070000  | -3.3755840000 | 2.2669170000  | H | 1.7470780000  | 1.8934130000  | 1.0444580000  |
| H | 1.1267130000  | -4.7510230000 | 1.1389120000  | C | 4.9060740000  | 3.0485900000  | 0.5490310000  |
| H | 1.8917690000  | -3.2064290000 | 0.7133260000  | H | 5.9046910000  | 3.1131880000  | -1.3594810000 |
| H | -1.5146650000 | -4.8300850000 | 1.2663510000  | H | 3.6554710000  | 2.8382740000  | 2.2922760000  |

|                                                                                   |               |               |               |                                                                                    |               |               |               |
|-----------------------------------------------------------------------------------|---------------|---------------|---------------|------------------------------------------------------------------------------------|---------------|---------------|---------------|
| H                                                                                 | -1.3810570000 | -3.4918490000 | 2.4250490000  | H                                                                                  | 5.7441430000  | 3.4669530000  | 1.0960650000  |
| H                                                                                 | -2.4025150000 | -3.3075600000 | 0.9831030000  | H                                                                                  | 0.3385290000  | -0.3319160000 | -4.2187870000 |
| <b>TS-outer-linear</b>                                                            |               |               |               | <b>TS-outer-branched</b>                                                           |               |               |               |
| 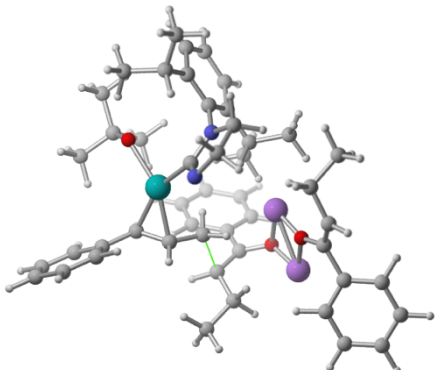 |               |               |               |  |               |               |               |
| Gas phase energy= -583.654428037                                                  |               |               |               | Gas phase energy= -583.632566904                                                   |               |               |               |
| Gas phase free energy correction= 1.174035                                        |               |               |               | Gas phase free energy correction= 1.169720                                         |               |               |               |
| SMD energy= -2811.88184567                                                        |               |               |               | SMD energy= -2811.86564820                                                         |               |               |               |
| C                                                                                 | -1.2176440000 | -1.0434640000 | 2.4898050000  | C                                                                                  | 1.1634660000  | -1.8373130000 | 0.4880110000  |
| H                                                                                 | -1.2465810000 | -2.1352200000 | 2.4639220000  | H                                                                                  | 1.4299250000  | -0.8529990000 | 0.0832190000  |
| C                                                                                 | -0.0002260000 | -0.3898680000 | 2.0463150000  | C                                                                                  | -0.2121540000 | -1.9022810000 | 0.9977950000  |
| C                                                                                 | 0.9489910000  | -1.0880800000 | 1.2207720000  | C                                                                                  | -0.8883670000 | -0.8589570000 | 1.7561800000  |
| H                                                                                 | 0.3364310000  | 0.5137220000  | 2.5502280000  | H                                                                                  | -0.6052100000 | -2.9118240000 | 1.1196930000  |
| H                                                                                 | 0.5197970000  | -1.8903090000 | 0.6272780000  | H                                                                                  | -0.3446650000 | 0.0284170000  | 2.0851270000  |
| Pd                                                                                | -1.4988600000 | -0.1797500000 | 0.5496290000  | Pd                                                                                 | -1.7124570000 | -0.6631250000 | -0.0937880000 |
| C                                                                                 | -1.9846040000 | -0.4581490000 | 3.6142580000  | C                                                                                  | 1.5283500000  | -2.9106410000 | -0.5122320000 |
| C                                                                                 | -2.6951770000 | -1.2798440000 | 4.5064370000  | C                                                                                  | 2.1478860000  | -2.5724580000 | -1.7201010000 |
| C                                                                                 | -2.0356860000 | 0.9334560000  | 3.8218180000  | C                                                                                  | 1.3033750000  | -4.2638570000 | -0.2318560000 |
| C                                                                                 | -3.4339200000 | -0.7356840000 | 5.5575390000  | C                                                                                  | 2.5154080000  | -3.5563870000 | -2.6376370000 |
| H                                                                                 | -2.6737450000 | -2.3575920000 | 4.3644370000  | H                                                                                  | 2.3208630000  | -1.5277430000 | -1.9554460000 |
| C                                                                                 | -2.7665720000 | 1.4768420000  | 4.8755200000  | C                                                                                  | 1.6814440000  | -5.2515520000 | -1.1401420000 |
| H                                                                                 | -1.5300280000 | 1.5970160000  | 3.1277100000  | H                                                                                  | 0.8255600000  | -4.5490430000 | 0.7003310000  |
| C                                                                                 | -3.4729260000 | 0.6470760000  | 5.7512580000  | C                                                                                  | 2.2866160000  | -4.9014750000 | -2.3492530000 |
| H                                                                                 | -3.9821280000 | -1.3930400000 | 6.2254370000  | H                                                                                  | 2.9678880000  | -3.2702210000 | -3.5817400000 |
| H                                                                                 | -2.7948490000 | 2.5550670000  | 5.0026900000  | H                                                                                  | 1.4956880000  | -6.2950060000 | -0.9092430000 |
| H                                                                                 | -4.0490260000 | 1.0714370000  | 6.5673240000  | H                                                                                  | 2.5672090000  | -5.6695560000 | -3.0617980000 |
| H                                                                                 | 1.6570520000  | -0.4502840000 | 0.6844400000  | H                                                                                  | -1.6077070000 | -1.1943870000 | 2.5048210000  |
| C                                                                                 | -0.5950290000 | 3.1505440000  | -2.0861600000 | C                                                                                  | -4.7882980000 | 2.1123950000  | 1.2067970000  |
| C                                                                                 | -0.6013990000 | 2.0393430000  | -3.1443830000 | C                                                                                  | -3.9626880000 | 3.0302450000  | 0.2975570000  |
| H                                                                                 | -1.4316160000 | 3.8505160000  | -2.1964610000 | H                                                                                  | -5.7711630000 | 1.8727800000  | 0.7822480000  |
| H                                                                                 | -1.2899890000 | 2.2372130000  | -3.9683900000 | H                                                                                  | -4.5648730000 | 3.5593580000  | -0.4441780000 |
| C                                                                                 | -1.0680130000 | 1.0765320000  | -1.0224420000 | C                                                                                  | -3.0027940000 | 0.8612260000  | 0.2654900000  |
| N                                                                                 | -0.7457090000 | 2.3830700000  | -0.8333490000 | N                                                                                  | -3.9489250000 | 0.8967060000  | 1.2453840000  |
| N                                                                                 | -1.0414500000 | 0.8623380000  | -2.3633950000 | N                                                                                  | -3.0502850000 | 2.0690240000  | -0.3516640000 |
| C                                                                                 | -1.6276960000 | -0.2585180000 | -3.0342440000 | C                                                                                  | -2.3856190000 | 2.3925670000  | -1.5749290000 |
| C                                                                                 | -0.9072600000 | -1.4538580000 | -3.1829690000 | C                                                                                  | -1.0404810000 | 2.7909230000  | -1.5577940000 |
| C                                                                                 | -2.9227510000 | -0.1020380000 | -3.5630310000 | C                                                                                  | -3.1258400000 | 2.3097290000  | -2.7680250000 |
| C                                                                                 | -1.4985810000 | -2.4984320000 | -3.9027880000 | C                                                                                  | -0.4268350000 | 3.1031000000  | -2.7757310000 |
| C                                                                                 | -3.4763750000 | -1.1684420000 | -4.2758970000 | C                                                                                  | -2.4758940000 | 2.6247860000  | -3.9643100000 |
| C                                                                                 | -2.7714930000 | -2.3558150000 | -4.4487850000 | C                                                                                  | -1.1381320000 | 3.0162520000  | -3.9703680000 |
| H                                                                                 | -0.9707950000 | -3.4370170000 | -4.0353000000 | H                                                                                  | 0.6161390000  | 3.4092350000  | -2.7935520000 |
| H                                                                                 | -4.4793940000 | -1.0756780000 | -4.6804610000 | H                                                                                  | -3.0162430000 | 2.5463940000  | -4.9027670000 |
| C                                                                                 | -0.8490810000 | 3.0617870000  | 0.4244380000  | C                                                                                  | -4.3327970000 | -0.2372340000 | 2.0285330000  |
| C                                                                                 | -2.1263630000 | 3.3517300000  | 0.9480390000  | C                                                                                  | -4.9646810000 | -1.3297480000 | 1.3992040000  |
| C                                                                                 | 0.3306200000  | 3.4540860000  | 1.0840350000  | C                                                                                  | -4.0798010000 | -0.2213110000 | 3.4139700000  |
| C                                                                                 | -2.1918790000 | 4.0713800000  | 2.1472490000  | C                                                                                  | -5.3386680000 | -2.4155760000 | 2.2002110000  |
| C                                                                                 | 0.2158820000  | 4.1655710000  | 2.2833440000  | C                                                                                  | -4.4818120000 | -1.3238270000 | 4.1753490000  |
| C                                                                                 | -1.0360670000 | 4.4766560000  | 2.8091410000  | C                                                                                  | -5.1036290000 | -2.4150520000 | 3.5729990000  |
| H                                                                                 | -3.1620530000 | 4.3016840000  | 2.5749020000  | H                                                                                  | -5.8208150000 | -3.2723230000 | 1.7411640000  |
| H                                                                                 | 1.1118400000  | 4.4783910000  | 2.8108370000  | H                                                                                  | -4.3010910000 | -1.3328250000 | 5.2463600000  |

|   |               |               |               |   |               |               |               |
|---|---------------|---------------|---------------|---|---------------|---------------|---------------|
| C | -3.4149200000 | 2.9279670000  | 0.2545160000  | C | -5.2792500000 | -1.3461320000 | -0.0923050000 |
| H | -3.1677390000 | 2.2212900000  | -0.5414760000 | H | -4.7078300000 | -0.5551100000 | -0.5833830000 |
| C | 1.7043420000  | 3.1348140000  | 0.5122140000  | C | -3.4009620000 | 0.9639510000  | 4.0893390000  |
| H | 1.5665520000  | 2.4114050000  | -0.2999450000 | H | 3.0275830000  | 1.6224590000  | 3.2964420000  |
| C | -3.7354180000 | 1.1705640000  | -3.3568530000 | C | -4.5908100000 | 1.8917140000  | -2.7692350000 |
| H | -3.1143620000 | 1.8905940000  | -2.8146440000 | H | -4.8997670000 | 1.7536030000  | -1.7279270000 |
| C | 0.4929000000  | -1.6159220000 | -2.6007510000 | C | -0.2688450000 | 2.9013170000  | -0.2510880000 |
| H | 0.5883360000  | -0.8459310000 | -1.8176180000 | H | -0.9396690000 | 2.5836430000  | 0.5537280000  |
| H | -3.2196210000 | -3.1779860000 | -4.9964220000 | H | -0.6467250000 | 3.2462510000  | -4.9099420000 |
| H | -1.1106620000 | 5.0273040000  | 3.7410890000  | H | -5.4051840000 | -3.2669170000 | 4.1740610000  |
| C | 0.6844400000  | -2.9977020000 | -1.9552170000 | C | 0.9326940000  | 1.9389630000  | -0.2184270000 |
| H | 1.6720010000  | -3.1174060000 | -1.4901950000 | H | 1.4199090000  | 2.0360520000  | 0.7669230000  |
| H | 0.6186570000  | -3.7996730000 | -2.6969260000 | H | 1.6594070000  | 2.1711240000  | -1.0090270000 |
| H | -0.0733530000 | -3.1832490000 | -1.1884260000 | H | 0.5635340000  | 0.9163450000  | -0.3530440000 |
| C | 1.5570400000  | -1.3592200000 | -3.6874530000 | C | 0.1596360000  | 4.3510980000  | 0.0269440000  |
| H | 1.4176010000  | -0.3780680000 | -4.1473640000 | H | -0.7079500000 | 5.0190660000  | 0.0242010000  |
| H | 1.4818700000  | -2.1185340000 | -4.4745180000 | H | 0.8604470000  | 4.7113280000  | -0.7360870000 |
| H | 2.5871460000  | -1.3971220000 | -3.2978070000 | H | 0.6495990000  | 4.4240740000  | 1.0052090000  |
| C | 2.6287350000  | 2.4802600000  | 1.5503910000  | C | -2.1884380000 | 0.5482530000  | 4.9417050000  |
| H | 2.8906050000  | 3.1753340000  | 2.3562730000  | H | -2.4879510000 | -0.0905860000 | 5.7803620000  |
| H | 3.5568630000  | 2.1658420000  | 1.0612310000  | H | -1.7025450000 | 1.4376070000  | 5.3599040000  |
| H | 2.1499680000  | 1.6066490000  | 2.0019350000  | H | -1.4547200000 | 0.0029640000  | 4.3422140000  |
| C | 2.3738990000  | 4.3960380000  | -0.0658430000 | C | -4.4084150000 | 1.7518690000  | 4.9510480000  |
| H | 1.7441000000  | 4.8768620000  | -0.8219390000 | H | -5.2898140000 | 2.0484520000  | 4.3724350000  |
| H | 3.3352240000  | 4.1374850000  | -0.5242150000 | H | -3.9434750000 | 2.6546870000  | 5.3634780000  |
| H | 2.5563130000  | 5.1319840000  | 0.7263800000  | H | -4.7576400000 | 1.1373810000  | 5.7893830000  |
| C | -4.1073950000 | 4.1468970000  | -0.3851990000 | C | -6.7769340000 | -1.0687450000 | -0.3277250000 |
| H | -3.4415760000 | 4.6671710000  | -1.0839660000 | H | -7.0838310000 | -0.1178120000 | 0.1237130000  |
| H | -4.4184140000 | 4.8675310000  | 0.3807680000  | H | -7.3973890000 | -1.8621110000 | 0.1070300000  |
| H | -5.0008320000 | 3.8266980000  | -0.9325730000 | H | -6.9830430000 | -1.0227510000 | -1.4029420000 |
| C | -4.3676270000 | 2.1767790000  | 1.1982620000  | C | -4.8416410000 | -2.6514610000 | -0.7738230000 |
| H | -5.2416620000 | 1.8351390000  | 0.6346920000  | H | -4.9666030000 | -2.5536710000 | -1.8563140000 |
| H | -4.7152460000 | 2.8128310000  | 2.0217380000  | H | -5.4303400000 | -3.5121990000 | -0.4310390000 |
| H | -3.8833240000 | 1.2877930000  | 1.6098400000  | H | -3.7791240000 | -2.8356460000 | -0.5943410000 |
| C | -4.1354450000 | 1.8147120000  | -4.6965750000 | C | -5.4866280000 | 2.9842790000  | -3.3810480000 |
| H | -3.2618960000 | 2.0129430000  | -5.3294000000 | H | -5.3468910000 | 3.9498100000  | -2.8800470000 |
| H | -4.6545730000 | 2.7626440000  | -4.5165430000 | H | -6.5409330000 | 2.6980820000  | -3.2951270000 |
| H | -4.8146640000 | 1.1655010000  | -5.2607140000 | H | -5.2661530000 | 3.1251280000  | -4.4454440000 |
| C | -4.9558810000 | 0.9093410000  | -2.4593900000 | C | -4.7959910000 | 0.5309140000  | -3.4519430000 |
| H | -4.6178670000 | 0.4645980000  | -1.5137020000 | H | -4.1177750000 | -0.2047150000 | -2.9969450000 |
| H | -5.6596590000 | 0.2178330000  | -2.9387940000 | H | -4.5763910000 | 0.5909460000  | -4.5252730000 |
| H | -5.4853100000 | 1.8512200000  | -2.2679960000 | H | -5.8403410000 | 0.2121350000  | -3.3397800000 |
| O | -3.3746020000 | -0.7046160000 | -0.2576550000 | O | -2.3448910000 | -0.8992920000 | -2.1171500000 |
| H | 0.3915380000  | 1.8574120000  | -3.5654230000 | H | -3.3827270000 | 3.7693780000  | 0.8648080000  |
| H | 0.3352970000  | 3.7221060000  | -2.0818590000 | H | -4.9335430000 | 2.5247930000  | 2.2065600000  |
| C | -3.9499770000 | -1.9947620000 | -0.0081560000 | C | -1.4861600000 | -1.4745720000 | -3.1038700000 |
| C | -2.9105420000 | -3.1111220000 | -0.2475810000 | C | -0.1736900000 | -0.6680920000 | -3.1685740000 |
| C | -4.4946690000 | -2.0741790000 | 1.4274140000  | C | -1.2169200000 | -2.9545330000 | -2.7706340000 |
| C | -5.1117940000 | -2.1870170000 | -1.0024200000 | C | -2.1778690000 | -1.3885690000 | -4.4788340000 |
| H | -2.5225300000 | -3.0258110000 | -1.2688310000 | H | -0.4067080000 | 0.3662660000  | -3.4405990000 |
| H | -2.0739400000 | -2.9978870000 | 0.4527110000  | H | 0.2863270000  | -0.6583590000 | -2.1751580000 |
| H | -3.3467740000 | -4.1106660000 | -0.1144600000 | H | 0.5426770000  | -1.0836080000 | -3.8912130000 |
| H | -5.2129430000 | -1.2635140000 | 1.5890180000  | H | -2.1648710000 | -3.5040110000 | -2.7981910000 |
| H | -4.9928360000 | -3.0332990000 | 1.6232730000  | H | -0.5133380000 | -3.4221600000 | -3.4725040000 |
| H | -3.6814420000 | -1.9454230000 | 2.1438080000  | H | -0.8080030000 | -3.0347740000 | -1.7592080000 |
| H | -5.5814420000 | -3.1718100000 | -0.8812450000 | H | -1.5683080000 | -1.8558900000 | -5.2636730000 |
| H | -5.8725800000 | -1.4167390000 | -0.8400830000 | H | -3.1470210000 | -1.8973710000 | -4.4378930000 |
| H | -4.7384160000 | -2.0943550000 | -2.0270240000 | H | -2.3488170000 | -0.3400440000 | -4.7438760000 |
| C | 4.2850550000  | 1.9574710000  | -2.0604570000 | C | 6.9243280000  | 2.5846890000  | -0.4730460000 |
| C | 4.6966800000  | 1.0019520000  | -1.2061910000 | C | 5.6799320000  | 2.7225410000  | 0.0377420000  |
| O | 3.9727560000  | -0.0928250000 | -0.8438540000 | O | 4.8193700000  | 1.6697150000  | 0.0661810000  |
| C | 6.0406920000  | 1.0628150000  | -0.5484600000 | C | 5.1912000000  | 4.0107080000  | 0.6031550000  |
| C | 6.1692100000  | 0.7949480000  | 0.8276320000  | C | 3.8639100000  | 4.4199570000  | 0.4097170000  |
| C | 7.2029390000  | 1.3286100000  | -1.2862490000 | C | 6.0508760000  | 4.8377880000  | 1.3432050000  |
| C | 7.4220410000  | 0.7912920000  | 1.4457740000  | C | 3.4170430000  | 5.6400200000  | 0.9183520000  |
| H | 5.2752980000  | 0.6793780000  | 1.4393880000  | H | 3.1913130000  | 3.7933800000  | -0.1671720000 |

|    |               |               |               |    |              |               |               |
|----|---------------|---------------|---------------|----|--------------|---------------|---------------|
| C  | 8.4543710000  | 1.3271900000  | -0.6681000000 | C  | 5.6006970000 | 6.0533570000  | 1.8587730000  |
| H  | 7.1178100000  | 1.5190710000  | -2.3508250000 | H  | 7.0700990000 | 4.5149170000  | 1.5287820000  |
| C  | 8.5709320000  | 1.0521310000  | 0.6965970000  | C  | 4.2826170000 | 6.4604560000  | 1.6449440000  |
| H  | 7.4980400000  | 0.6055910000  | 2.5120920000  | H  | 2.3950180000 | 5.9560780000  | 0.7423200000  |
| H  | 9.3430010000  | 1.5323630000  | -1.2549300000 | H  | 6.2758420000 | 6.6776280000  | 2.4344010000  |
| H  | 9.5451990000  | 1.0477090000  | 1.1721190000  | H  | 3.9307900000 | 7.4060980000  | 2.0430460000  |
| H  | 4.9528060000  | 2.7965100000  | -2.2476880000 | H  | 7.5863740000 | 3.4435980000  | -0.5283620000 |
| C  | 2.9838160000  | 1.9474380000  | -2.8078140000 | C  | 7.4372560000 | 1.2747570000  | -1.0136170000 |
| C  | 3.1913850000  | 1.7738360000  | -4.3226960000 | C  | 8.8179050000 | 1.3905160000  | -1.6707770000 |
| H  | 2.3363660000  | 1.1495590000  | -2.4201560000 | H  | 7.5181410000 | 0.5203930000  | -0.2010740000 |
| H  | 2.4502870000  | 2.8922160000  | -2.6275630000 | H  | 6.7323940000 | 0.8719520000  | -1.7700270000 |
| H  | 2.2426340000  | 1.8082780000  | -4.8713500000 | H  | 9.1634110000 | 0.4267350000  | -2.0578350000 |
| H  | 3.6764520000  | 0.8153120000  | -4.5364430000 | H  | 9.5560800000 | 1.7524290000  | -0.9477750000 |
| H  | 3.8335660000  | 2.5690050000  | -4.7173940000 | H  | 8.7828960000 | 2.1013640000  | -2.5022710000 |
| C  | 2.2582720000  | -2.0744120000 | 2.2359170000  | C  | 2.3689080000 | -1.9136620000 | 1.7743020000  |
| C  | 2.6037580000  | -2.9857640000 | 1.2151360000  | C  | 3.6125440000 | -1.9887250000 | 1.0499450000  |
| O  | 3.4565390000  | -2.5941400000 | 0.2871000000  | O  | 4.0254690000 | -0.8982670000 | 0.4760760000  |
| C  | 1.8885080000  | -4.2553610000 | 0.9949200000  | C  | 4.3538150000 | -3.2364950000 | 0.8160730000  |
| C  | 2.4381870000  | -5.2061160000 | 0.1186010000  | C  | 5.1241170000 | -3.3842480000 | -0.3493240000 |
| C  | 0.6352620000  | -4.5077480000 | 1.5800060000  | C  | 4.3107510000 | -4.2907730000 | 1.7437830000  |
| C  | 1.7530880000  | -6.3851780000 | -0.1607800000 | C  | 5.8231240000 | -4.5626510000 | -0.5899450000 |
| H  | 3.3993950000  | -5.0029440000 | -0.3385030000 | H  | 5.1136650000 | -2.5993850000 | -1.0979100000 |
| C  | -0.0569870000 | -5.6791400000 | 1.2813870000  | C  | 5.0224670000 | -5.4641270000 | 1.5077460000  |
| H  | 0.1787680000  | -3.7794640000 | 2.2404030000  | H  | 3.7344520000 | -4.1883420000 | 2.6559550000  |
| C  | 0.5000670000  | -6.6202110000 | 0.4132980000  | C  | 5.7752120000 | -5.6044660000 | 0.3397710000  |
| H  | 2.1878130000  | -7.1167080000 | -0.8329870000 | H  | 6.3864760000 | -4.6791370000 | -1.5087950000 |
| H  | -1.0362630000 | -5.8466470000 | 1.7141560000  | H  | 4.9874010000 | -6.2698650000 | 2.2319120000  |
| H  | -0.0414700000 | -7.5300680000 | 0.1809430000  | H  | 6.3157480000 | -6.5248280000 | 0.1510170000  |
| H  | 1.6619700000  | -2.4701010000 | 3.0547440000  | H  | 2.1160780000 | -2.8297190000 | 2.3083280000  |
| C  | 3.2968850000  | -1.0452040000 | 2.6658840000  | C  | 2.2410160000 | -0.6623920000 | 2.6627830000  |
| C  | 2.9883290000  | -0.4228420000 | 4.0308800000  | C  | 1.5698990000 | -0.9636790000 | 4.0055400000  |
| H  | 4.2918520000  | -1.5240200000 | 2.7145250000  | H  | 3.2400280000 | -0.2397660000 | 2.8511650000  |
| H  | 3.3602770000  | -0.2396090000 | 1.9193200000  | H  | 1.6573730000 | 0.1125650000  | 2.1449600000  |
| H  | 3.7148580000  | 0.3575370000  | 4.2794250000  | H  | 1.4043080000 | -0.0446430000 | 4.5771260000  |
| H  | 3.0182690000  | -1.1829570000 | 4.8182450000  | H  | 2.1957080000 | -1.6323320000 | 4.6073280000  |
| H  | 1.9909480000  | 0.0262900000  | 4.0394050000  | H  | 0.6009650000 | -1.4443150000 | 3.8459220000  |
| Li | 2.7218280000  | -1.3108300000 | -1.0508390000 | Li | 5.4068750000 | -0.0050880000 | -0.2466510000 |
| Li | 4.6906250000  | -1.2489020000 | 0.3654670000  | Li | 3.3065420000 | 0.8894970000  | 0.5794170000  |

| TS-outer-linear-2                                                                   |               |                |               | TS-outer-branched-2                                                                  |               |                |               |
|-------------------------------------------------------------------------------------|---------------|----------------|---------------|--------------------------------------------------------------------------------------|---------------|----------------|---------------|
| 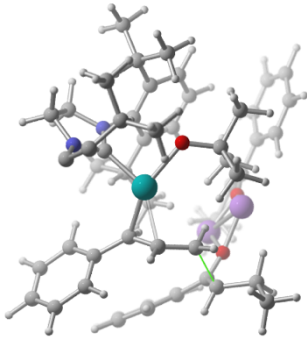 |               |                |               |  |               |                |               |
| Gas phase energy=                                                                   |               | -583.645766498 |               | Gas phase energy=                                                                    |               | -583.638427798 |               |
| Gas phase free energy correction=                                                   |               | 1.174114       |               | Gas phase free energy correction=                                                    |               | 1.169966       |               |
| SMD energy=                                                                         |               | -2811.86963039 |               | SMD energy=                                                                          |               | -2811.86429685 |               |
| C                                                                                   | 0.2285990000  | 1.6731940000   | 2.6466320000  | C                                                                                    | 0.9234430000  | 0.5059570000   | -2.8417600000 |
| H                                                                                   | 1.0217570000  | 1.0945920000   | 2.1880360000  | H                                                                                    | -0.0371800000 | 0.2316150000   | -3.2643720000 |
| C                                                                                   | -0.9918420000 | 1.8209160000   | 1.9125790000  | C                                                                                    | 1.0650950000  | 1.6726370000   | -2.0015550000 |
| C                                                                                   | -1.0921400000 | 1.8903820000   | 0.4672530000  | C                                                                                    | -0.0322960000 | 2.2809350000   | -1.2416910000 |
| H                                                                                   | -1.8650140000 | 2.0950150000   | 2.5027450000  | H                                                                                    | 1.9542900000  | 2.2912170000   | -2.1198920000 |
| H                                                                                   | -0.1230680000 | 1.9142270000   | -0.0421580000 | H                                                                                    | -0.6815410000 | 1.5389670000   | -0.7706680000 |

|    |               |               |               |    |               |               |               |
|----|---------------|---------------|---------------|----|---------------|---------------|---------------|
| Pd | -1.2152740000 | -0.1512500000 | 0.8814810000  | Pd | 1.3397880000  | -0.2993380000 | -0.9883730000 |
| C  | -3.4798650000 | -2.0363220000 | -2.3191680000 | C  | 3.9581520000  | -1.0047090000 | 2.4231920000  |
| C  | -2.0757720000 | -2.0509570000 | -2.9269370000 | C  | 2.6456440000  | -1.3906620000 | 3.1091840000  |
| H  | -3.8379030000 | -3.0360960000 | -2.0474120000 | H  | 4.6054870000  | -1.8672240000 | 2.2227570000  |
| H  | -1.7782540000 | -3.0284730000 | -3.3079080000 | H  | 2.6716900000  | -2.3792450000 | 3.5690000000  |
| C  | -1.9593770000 | -1.0774960000 | -0.7744100000 | C  | 2.1589810000  | -0.6926660000 | 0.8903160000  |
| N  | -3.2739740000 | -1.2276440000 | -1.0949910000 | N  | 3.4707020000  | -0.4340860000 | 1.1520560000  |
| N  | -1.2410310000 | -1.6515780000 | -1.7760960000 | N  | 1.6789660000  | -1.3482180000 | 1.9864420000  |
| C  | 0.1245190000  | -2.0794030000 | -1.6755010000 | C  | 0.5003110000  | -2.1660700000 | 2.0389370000  |
| C  | 1.1729910000  | -1.1754460000 | -1.9174600000 | C  | -0.7718950000 | -1.5833670000 | 2.1726620000  |
| C  | 0.3664690000  | -3.4307600000 | -1.3635680000 | C  | 0.6684630000  | -3.5618560000 | 1.9844370000  |
| C  | 2.4879200000  | -1.6469360000 | -1.8400100000 | C  | -1.8814370000 | -2.4280760000 | 2.2908940000  |
| C  | 1.6954740000  | -3.8595700000 | -1.2908360000 | C  | -0.4613580000 | -4.3713980000 | 2.1407960000  |
| C  | 2.7473050000  | -2.9794600000 | -1.5255160000 | C  | -1.7247020000 | -3.8126200000 | 2.2954230000  |
| H  | 3.3214790000  | -0.9751610000 | -2.0194020000 | H  | -2.8791890000 | -2.0085300000 | 2.3688920000  |
| H  | 1.9109140000  | -4.8950280000 | -1.0446550000 | H  | -0.3534950000 | -5.4508460000 | 2.0966990000  |
| C  | -4.3763550000 | -0.9646600000 | -0.2105700000 | C  | 4.4081410000  | 0.0392840000  | 0.1777980000  |
| C  | -4.4992880000 | -1.7037870000 | 0.9886650000  | C  | 4.8081230000  | -0.8156150000 | -0.8719620000 |
| C  | -5.3549750000 | -0.0262560000 | -0.5965120000 | C  | 4.9473820000  | 1.3283350000  | 0.3294360000  |
| C  | -5.5932100000 | -1.4277250000 | 1.8178840000  | C  | 5.7541520000  | -0.3310790000 | -1.7823640000 |
| C  | -6.4416830000 | 0.1959460000  | 0.2571320000  | C  | 5.8980220000  | 1.7673370000  | -0.5988360000 |
| C  | -6.5537110000 | -0.4857730000 | 1.4634280000  | C  | 6.2950910000  | 0.9460750000  | -1.6504750000 |
| H  | -5.7004080000 | -1.9705640000 | 2.7500810000  | H  | 6.0753710000  | -0.9649600000 | -2.6024510000 |
| H  | -7.2034360000 | 0.9157170000  | -0.0238490000 | H  | 6.3275930000  | 2.7599270000  | -0.4989700000 |
| C  | -3.5619240000 | -2.8469140000 | 1.3612030000  | C  | 4.2913490000  | -2.2434370000 | -1.0089990000 |
| H  | -2.5915290000 | -2.7051180000 | 0.8800130000  | H  | 3.3985510000  | -2.3559420000 | -0.3889540000 |
| C  | -5.2951240000 | 0.7200530000  | -1.9219290000 | C  | 4.5212460000  | 2.2388980000  | 1.4706060000  |
| H  | -4.2801180000 | 0.6117190000  | -2.3231120000 | H  | 3.6987240000  | 1.7434650000  | 1.9984830000  |
| C  | -0.7598860000 | -4.4352140000 | -1.1488420000 | C  | 2.0164230000  | -4.2134020000 | 1.6994510000  |
| H  | -1.7135070000 | -3.9004030000 | -1.1999430000 | H  | 2.7739770000  | -3.4264530000 | 1.6318720000  |
| C  | 0.8741300000  | 0.2664760000  | -2.2968080000 | C  | -0.9227670000 | -0.0698050000 | 2.1826210000  |
| H  | -0.1286130000 | 0.4910940000  | -1.9244300000 | H  | -0.2250340000 | 0.3162800000  | 1.4279950000  |
| H  | 3.7710450000  | -3.3292630000 | -1.4594270000 | H  | -2.5934950000 | -4.4557260000 | 2.3887630000  |
| H  | -7.3943490000 | -0.2928800000 | 2.1220160000  | H  | 7.0296630000  | 1.2990730000  | -2.3671820000 |
| C  | 1.8340680000  | 1.2662780000  | -1.6362580000 | C  | -2.3342860000 | 0.3930180000  | 1.8043800000  |
| H  | 1.5000920000  | 2.2952860000  | -1.8180820000 | H  | -2.3357590000 | 1.4765990000  | 1.6444950000  |
| H  | 2.8492960000  | 1.1498820000  | -2.0404730000 | H  | -3.0576800000 | 0.1708600000  | 2.5984210000  |
| H  | 1.8524900000  | 1.0885990000  | -0.5540010000 | H  | -2.6941960000 | -0.0950790000 | 0.8935130000  |
| C  | 0.8725210000  | 0.4467990000  | -3.8257570000 | C  | -0.5363270000 | 0.5212040000  | 3.5520070000  |
| H  | 0.1567580000  | -0.2344590000 | -4.2973020000 | H  | 0.5073970000  | 0.3092190000  | 3.7947790000  |
| H  | 1.8641890000  | 0.2322860000  | -4.2421680000 | H  | -1.1681320000 | 0.0961800000  | 4.3409390000  |
| H  | 0.6000760000  | 1.4747830000  | -4.0941310000 | H  | -0.6696260000 | 1.6102360000  | 3.5594310000  |
| C  | -5.5558980000 | 2.2230560000  | -1.7491950000 | C  | 3.9739670000  | 3.5737880000  | 0.9462320000  |
| H  | -6.6010010000 | 2.4222370000  | -1.4851090000 | H  | 4.7509620000  | 4.1565090000  | 0.4371590000  |
| H  | -5.3439870000 | 2.7543100000  | -2.6824160000 | H  | 3.5847490000  | 4.1801270000  | 1.7710510000  |
| H  | -4.9176750000 | 2.6384460000  | -0.9676810000 | H  | 3.1584840000  | 3.3978970000  | 0.2402380000  |
| C  | -6.3072370000 | 0.1320280000  | -2.9284970000 | C  | 5.6752550000  | 2.4665390000  | 2.4649010000  |
| H  | -6.1890650000 | -0.9487460000 | -3.0576430000 | H  | 6.0659250000  | 1.5189190000  | 2.8523390000  |
| H  | -6.1991850000 | 0.6136640000  | -3.9071380000 | H  | 5.3377770000  | 3.0746180000  | 3.3120380000  |
| H  | -7.3308370000 | 0.3062880000  | -2.5762030000 | H  | 6.5063190000  | 2.9931900000  | 1.9807720000  |
| C  | -4.1684510000 | -4.1804530000 | 0.8783800000  | C  | 5.3545880000  | -3.2430130000 | -0.5118020000 |
| H  | -4.3085570000 | -4.1912320000 | -0.2088020000 | H  | 5.6354640000  | -3.0472700000 | 0.5294970000  |
| H  | -5.1471450000 | -4.3523440000 | 1.3434020000  | H  | 6.2645880000  | -3.1813560000 | -1.1211160000 |
| H  | -3.5095360000 | -5.0122180000 | 1.1474630000  | H  | 4.9679230000  | -4.2658810000 | -0.5775840000 |
| C  | -3.2521370000 | -2.9096590000 | 2.8635390000  | C  | 3.8475860000  | -2.5823750000 | -2.4402400000 |
| H  | -2.4533670000 | -3.6381590000 | 3.0290270000  | H  | 3.3671000000  | -3.5655740000 | -2.4465920000 |
| H  | -4.1240280000 | -3.2104730000 | 3.4587260000  | H  | 4.6935300000  | -2.6062220000 | -3.1389760000 |
| H  | -2.8825760000 | -1.9432470000 | 3.2160920000  | H  | 3.1046130000  | -1.8602040000 | -2.7889790000 |
| C  | -0.7518660000 | -5.5086920000 | -2.2552290000 | C  | 2.4388250000  | -5.1838360000 | 2.8168880000  |
| H  | -0.7850100000 | -5.0637620000 | -3.2565720000 | H  | 2.4471730000  | -4.6960010000 | 3.7988150000  |
| H  | -1.6138090000 | -6.1761340000 | -2.1436080000 | H  | 3.4422140000  | -5.5763390000 | 2.6170610000  |
| H  | 0.1562540000  | -6.1197900000 | -2.1964960000 | H  | 1.7540090000  | -6.0375710000 | 2.8763750000  |
| C  | -0.7142010000 | -5.0761140000 | 0.2444590000  | C  | 2.0023770000  | -4.9016310000 | 0.3235710000  |
| H  | -0.8209790000 | -4.2939610000 | 1.0018300000  | H  | 1.7397830000  | -4.1621210000 | -0.4436070000 |
| H  | 0.2306650000  | -5.6057060000 | 0.4135270000  | H  | 1.2645320000  | -5.7128890000 | 0.2960870000  |
| H  | -1.5256870000 | -5.8060690000 | 0.3456020000  | H  | 2.9877060000  | -5.3345660000 | 0.1111150000  |

|   |               |               |               |   |               |               |               |
|---|---------------|---------------|---------------|---|---------------|---------------|---------------|
| O | -0.5058180000 | -2.0616860000 | 1.6562190000  | O | 0.7483210000  | -2.3520920000 | -1.1707260000 |
| H | -1.9692910000 | -1.3160630000 | -3.7334260000 | H | 2.3562790000  | -0.6655780000 | 3.8780240000  |
| H | -4.2125790000 | -1.5735000000 | -2.9777340000 | H | 4.5315750000  | -0.2663840000 | 2.9876970000  |
| C | 0.6161480000  | -2.1321530000 | 2.5324480000  | C | -0.3909520000 | -2.7087200000 | -1.9493530000 |
| C | 1.8401430000  | -1.4269840000 | 1.8791980000  | C | -1.5521160000 | -1.7060590000 | -1.6997150000 |
| C | 0.2617340000  | -1.5219310000 | 3.9044880000  | C | -0.0371030000 | -2.7610950000 | -3.4487780000 |
| C | 1.0182400000  | -3.6043370000 | 2.7589100000  | C | -0.8824090000 | -4.0989060000 | -1.5026050000 |
| H | 2.2271230000  | -2.0319160000 | 1.0539590000  | H | -1.8402790000 | -1.7714510000 | -0.6419440000 |
| H | 1.4974910000  | -0.4805210000 | 1.4427570000  | H | -1.1516240000 | -0.7043130000 | -1.9139500000 |
| H | 2.6484130000  | -1.2737340000 | 2.6192560000  | H | -2.4248720000 | -1.9362990000 | -2.3279740000 |
| H | -0.4457190000 | -2.1842760000 | 4.4143100000  | H | 0.7563930000  | -3.5019070000 | -3.5922980000 |
| H | 1.1396080000  | -1.3877720000 | 4.5524130000  | H | -0.9003120000 | -3.0481990000 | -4.0654400000 |
| H | -0.2384670000 | -0.5630130000 | 3.7624660000  | H | 0.3434720000  | -1.7966950000 | -3.7922680000 |
| H | 1.8325840000  | -3.6830110000 | 3.4924340000  | H | -1.8019410000 | -4.3870420000 | -2.0276280000 |
| H | 0.1580710000  | -4.1677180000 | 3.1341860000  | H | -0.1123260000 | -4.8485750000 | -1.7077130000 |
| H | 1.3495280000  | -4.0574010000 | 1.8206080000  | H | -1.0795440000 | -4.0894610000 | -0.4275590000 |
| C | -2.0203600000 | 2.8194800000  | -0.2341880000 | C | 0.3768570000  | 3.3892310000  | -0.3081430000 |
| C | -1.9506150000 | 2.9265500000  | -1.6365520000 | C | 0.0913690000  | 3.3293850000  | 1.0580320000  |
| C | -2.8434760000 | 3.7359610000  | 0.4434800000  | C | 1.0021850000  | 4.5401350000  | -0.8100760000 |
| C | -2.6211740000 | 3.9357730000  | -2.3241660000 | C | 0.3938020000  | 4.3992800000  | 1.9019550000  |
| H | -1.3316660000 | 2.2230210000  | -2.1863450000 | H | -0.3712180000 | 2.4379630000  | 1.4617060000  |
| C | -3.5206360000 | 4.7468120000  | -0.2442830000 | C | 1.3041320000  | 5.6128460000  | 0.0277440000  |
| H | -2.9273310000 | 3.6854160000  | 1.5239870000  | H | 1.2470450000  | 4.5974430000  | -1.8672980000 |
| C | -3.4007640000 | 4.8661810000  | -1.6302160000 | C | 0.9919820000  | 5.5500130000  | 1.3877510000  |
| H | -2.5291040000 | 4.0024910000  | -3.4039420000 | H | 0.1595860000  | 4.3310810000  | 2.9592550000  |
| H | -4.1379670000 | 5.4469980000  | 0.3097080000  | H | 1.7861960000  | 6.4953170000  | -0.3798220000 |
| H | -3.9190870000 | 5.6576020000  | -2.1616210000 | H | 1.2224200000  | 6.3851780000  | 2.0405910000  |
| H | 0.0762930000  | 1.3956130000  | 3.6850490000  | H | 1.7354190000  | 0.3206630000  | -3.5472580000 |
| C | 6.1011690000  | 0.6389530000  | -1.5135110000 | C | -5.8297410000 | -0.9293730000 | 1.1277410000  |
| C | 5.4784240000  | -0.0915130000 | -0.5585380000 | C | -5.1580530000 | -1.2268810000 | -0.0081080000 |
| O | 4.5673820000  | 0.4904000000  | 0.2560170000  | O | -4.6180880000 | -0.2347640000 | -0.7631810000 |
| C | 5.7283300000  | -1.5457210000 | -0.3395980000 | C | -4.9638330000 | -2.6129710000 | -0.5110640000 |
| C | 5.3426490000  | -2.1448000000 | 0.8663380000  | C | -4.9490160000 | -2.8547830000 | -1.8922330000 |
| C | 6.3085480000  | -2.3575440000 | -1.3285610000 | C | -4.7765800000 | -3.6906410000 | 0.3652240000  |
| C | 5.5240560000  | -3.5101380000 | 1.0846690000  | C | -4.7657670000 | -4.1457120000 | -2.3852500000 |
| H | 4.8892220000  | -1.5356220000 | 1.6384670000  | H | -5.0885950000 | -2.0218530000 | -2.5732800000 |
| C | 6.5013430000  | -3.7210880000 | -1.1098310000 | C | -4.5865020000 | -4.9815710000 | -0.1277810000 |
| H | 6.5839490000  | -1.9305000000 | -2.2865780000 | H | -4.7550390000 | -3.5103840000 | 1.4351850000  |
| C | 6.1060860000  | -4.3055220000 | 0.0965540000  | C | -4.5821950000 | -5.2139530000 | -1.5039390000 |
| H | 5.2040530000  | -3.9523620000 | 2.0221120000  | H | -4.7583940000 | -4.3187210000 | -3.4563810000 |
| H | 6.9452360000  | -4.3318540000 | -1.8888110000 | H | -4.4252670000 | -5.8030130000 | 0.5623920000  |
| H | 6.2452590000  | -5.3684150000 | 0.2608100000  | H | -4.4236940000 | -6.2157040000 | -1.8879290000 |
| H | 6.8603000000  | 0.1910630000  | -2.1468290000 | H | -6.3048240000 | -1.7156420000 | 1.7070360000  |
| C | 5.8351450000  | 2.1120510000  | -1.6964180000 | C | -6.0080100000 | 0.4944640000  | 1.5877500000  |
| C | 6.8159260000  | 2.7859760000  | -2.6635460000 | C | -6.7363050000 | 0.6156660000  | 2.9309380000  |
| H | 4.8115940000  | 2.2883290000  | -2.0861620000 | H | -5.0212850000 | 0.9880170000  | 1.6930090000  |
| H | 5.9013770000  | 2.6266390000  | -0.7177500000 | H | -6.5792430000 | 1.0729680000  | 0.8312350000  |
| H | 6.6046770000  | 3.8547900000  | -2.7719680000 | H | -6.8594630000 | 1.6616300000  | 3.2303080000  |
| H | 6.7549270000  | 2.3248140000  | -3.6549590000 | H | -6.1756570000 | 0.0981370000  | 3.7164730000  |
| H | 7.8430390000  | 2.6751880000  | -2.3013390000 | H | -7.7296690000 | 0.1595350000  | 2.8698500000  |
| C | 1.3768820000  | 3.1442590000  | 3.0194170000  | C | -1.3786730000 | 3.1115240000  | -2.2738980000 |
| C | 2.0923590000  | 3.2440320000  | 1.8055040000  | C | -2.4517750000 | 3.1329310000  | -1.3314810000 |
| O | 3.0047490000  | 2.3485430000  | 1.5174340000  | O | -3.1655810000 | 2.0514390000  | -1.1859200000 |
| C | 1.7769190000  | 4.2174090000  | 0.7413560000  | C | -2.7045610000 | 4.2466320000  | -0.3949140000 |
| C | 2.7719800000  | 4.5744540000  | -0.1899880000 | C | -3.4113570000 | 4.0082440000  | 0.7979430000  |
| C | 0.4864820000  | 4.7410400000  | 0.5909640000  | C | -2.2393260000 | 5.5469200000  | -0.6492930000 |
| C | 2.4682110000  | 5.4011960000  | -1.2682070000 | C | -3.6313460000 | 5.0291940000  | 1.7163920000  |
| H | 3.8056270000  | 4.2718220000  | -0.0254700000 | H | -3.7355190000 | 3.0020240000  | 1.0438020000  |
| C | 0.1774530000  | 5.5464750000  | -0.5047970000 | C | -2.4570540000 | 6.5688850000  | 0.2712480000  |
| H | -0.2940540000 | 4.4722750000  | 1.2912240000  | H | -1.7034520000 | 5.7633030000  | -1.5644090000 |
| C | 1.1620130000  | 5.8721740000  | -1.4384460000 | C | -3.1496630000 | 6.3144520000  | 1.4559230000  |
| H | 3.2453760000  | 5.6842080000  | -1.9700150000 | H | -4.1592470000 | 4.8216590000  | 2.6406240000  |
| H | -0.8405080000 | 5.8948150000  | -0.6366840000 | H | -2.0790630000 | 7.5635250000  | 0.0660740000  |
| H | 0.9162410000  | 6.4963190000  | -2.2899440000 | H | -3.3097890000 | 7.1102280000  | 2.1742140000  |
| H | 0.7228870000  | 3.9845980000  | 3.2481540000  | H | -0.9322890000 | 4.0834020000  | -2.4749390000 |
| C | 2.1499160000  | 2.6061890000  | 4.2272040000  | C | -1.6640910000 | 2.3311390000  | -3.5581430000 |



|                                                                                   |               |               |               |                                                                                    |               |               |               |
|-----------------------------------------------------------------------------------|---------------|---------------|---------------|------------------------------------------------------------------------------------|---------------|---------------|---------------|
| C                                                                                 | 1.4279130000  | 2.8769790000  | 5.5506640000  | C                                                                                  | -0.7247330000 | 2.7266750000  | -4.6993140000 |
| H                                                                                 | 2.3153590000  | 1.5237690000  | 4.1143840000  | H                                                                                  | -1.6021290000 | 1.2521650000  | -3.3819630000 |
| H                                                                                 | 3.1482400000  | 3.0616740000  | 4.2558650000  | H                                                                                  | -2.7030210000 | 2.5235090000  | -3.8618580000 |
| H                                                                                 | 1.9933410000  | 2.4681790000  | 6.3937340000  | H                                                                                  | -0.9224960000 | 2.1258970000  | -5.5927020000 |
| H                                                                                 | 0.4310730000  | 2.4222150000  | 5.5684090000  | H                                                                                  | 0.3204380000  | 2.5761840000  | -4.4169940000 |
| H                                                                                 | 1.3067040000  | 3.9533940000  | 5.7139930000  | H                                                                                  | -0.8664420000 | 3.7817750000  | -4.9626790000 |
| Li                                                                                | 3.8079800000  | 2.0748630000  | -0.1310600000 | Li                                                                                 | -4.7245600000 | 1.5013290000  | -0.4267700000 |
| Li                                                                                | 3.4314700000  | 0.5168410000  | 1.6123860000  | Li                                                                                 | -2.9947150000 | 0.1425710000  | -1.4542440000 |
| <b>P-linear</b>                                                                   |               |               |               | <b>P-branched</b>                                                                  |               |               |               |
| 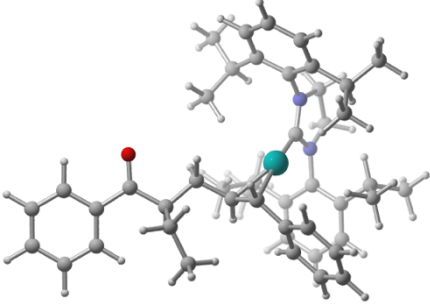 |               |               |               |  |               |               |               |
| Gas phase energy= -459.582373061                                                  |               |               |               | Gas phase energy= -459.578045666                                                   |               |               |               |
| Gas phase free energy correction= 0.865819                                        |               |               |               | Gas phase free energy correction= 0.866005                                         |               |               |               |
| SMD energy= -2100.68731150                                                        |               |               |               | SMD energy= -2100.67986638                                                         |               |               |               |
| Pd                                                                                | -0.6054740000 | -0.0937510000 | -0.5620920000 | Pd                                                                                 | 0.6727000000  | -0.4335530000 | -0.5337820000 |
| C                                                                                 | -3.6044590000 | 0.8896470000  | 2.4379220000  | C                                                                                  | 3.9675340000  | 2.1548650000  | 0.7378080000  |
| C                                                                                 | -3.6676360000 | 2.1857120000  | 1.6029750000  | C                                                                                  | 4.4834320000  | 0.7842300000  | 1.2099370000  |
| H                                                                                 | -4.5441180000 | 0.3282100000  | 2.4235500000  | H                                                                                  | 4.5465370000  | 2.5566230000  | -0.1027630000 |
| H                                                                                 | -4.6293900000 | 2.3196150000  | 1.0965130000  | H                                                                                  | 5.4754830000  | 0.5418130000  | 0.8216970000  |
| C                                                                                 | -1.9827360000 | 0.7724840000  | 0.6995910000  | C                                                                                  | 2.3581550000  | 0.4975800000  | 0.1910870000  |
| N                                                                                 | -2.5444930000 | 0.1271950000  | 1.7506880000  | N                                                                                  | 2.5984200000  | 1.8269580000  | 0.2919140000  |
| N                                                                                 | -2.5978050000 | 1.9729330000  | 0.6060890000  | N                                                                                  | 3.4643730000  | -0.1311270000 | 0.6570990000  |
| C                                                                                 | -2.3278520000 | 2.9391150000  | -0.4148450000 | C                                                                                  | 3.5729320000  | -1.5518430000 | 0.7906330000  |
| C                                                                                 | -1.4105410000 | 3.9717290000  | -0.1465660000 | C                                                                                  | 2.9790690000  | -2.1861880000 | 1.8956040000  |
| C                                                                                 | -2.9766900000 | 2.8177670000  | -1.6559660000 | C                                                                                  | 4.2536270000  | -2.2706510000 | -0.2093760000 |
| C                                                                                 | -1.1628370000 | 4.9081840000  | -1.1550850000 | C                                                                                  | 3.0895770000  | -3.5787070000 | 1.9895690000  |
| C                                                                                 | -2.6987570000 | 3.7747570000  | -2.6388750000 | C                                                                                  | 4.3400490000  | -3.6600080000 | -0.0774140000 |
| C                                                                                 | -1.8045410000 | 4.8127220000  | -2.3890670000 | C                                                                                  | 3.7644490000  | -4.3084750000 | 1.0147420000  |
| H                                                                                 | -0.4504710000 | 5.7084000000  | -0.9849400000 | H                                                                                  | 2.6349800000  | -4.0964060000 | 2.8288590000  |
| H                                                                                 | -3.1748320000 | 3.7001470000  | -3.6116500000 | H                                                                                  | 4.8511950000  | -4.2440960000 | -0.8354910000 |
| C                                                                                 | -2.2024700000 | -1.2127930000 | 2.1199620000  | C                                                                                  | 1.6646830000  | 2.8390430000  | -0.0941360000 |
| C                                                                                 | -2.8796460000 | -2.2798060000 | 1.5032500000  | C                                                                                  | 1.5630390000  | 3.2083430000  | -1.4459110000 |
| C                                                                                 | -1.1731760000 | -1.4206090000 | 3.0549490000  | C                                                                                  | 0.8641550000  | 3.4239420000  | 0.9064160000  |
| C                                                                                 | -2.4983610000 | -3.5827550000 | 1.8398420000  | C                                                                                  | 0.6340190000  | 4.1995350000  | -1.7867310000 |
| C                                                                                 | -0.8174100000 | -2.7393340000 | 3.3582860000  | C                                                                                  | -0.0457300000 | 4.4128400000  | 0.5241920000  |
| C                                                                                 | -1.4740870000 | -3.8114210000 | 2.7556140000  | C                                                                                  | -0.1570700000 | 4.7995700000  | -0.8111080000 |
| H                                                                                 | -2.9932820000 | -4.4249130000 | 1.3660130000  | H                                                                                  | 0.5285670000  | 4.5010940000  | -2.8246270000 |
| H                                                                                 | -0.0174690000 | -2.9311680000 | 4.0668650000  | H                                                                                  | -0.6870850000 | 4.8729760000  | 1.2678010000  |
| C                                                                                 | -3.9793620000 | -2.0446330000 | 0.4773370000  | C                                                                                  | 2.4073580000  | 2.5459080000  | -2.5256300000 |
| H                                                                                 | -4.1175050000 | -0.9619180000 | 0.3769850000  | H                                                                                  | 3.0888110000  | 1.8410730000  | -2.0366050000 |
| C                                                                                 | -0.4240400000 | -0.2515740000 | 3.6798190000  | C                                                                                  | 0.9403440000  | 2.9273170000  | 2.3441500000  |
| H                                                                                 | -0.9822800000 | 0.6630930000  | 3.4488380000  | H                                                                                  | 1.9352450000  | 2.4915480000  | 2.4952040000  |
| C                                                                                 | -3.9042560000 | 1.6490110000  | -1.9610730000 | C                                                                                  | 4.8068770000  | -1.5607960000 | -1.4382030000 |
| H                                                                                 | -4.0989650000 | 1.1182330000  | -1.0220010000 | H                                                                                  | 4.9597930000  | -0.5075590000 | -1.1738770000 |
| C                                                                                 | -0.6391310000 | 4.0058100000  | 1.1654220000  | C                                                                                  | 2.2076240000  | -1.4112180000 | 2.9557610000  |
| H                                                                                 | -1.2103970000 | 3.4303520000  | 1.9039880000  | H                                                                                  | 2.2485080000  | -0.3470570000 | 2.6972450000  |
| H                                                                                 | -1.1844990000 | -4.8285290000 | 2.9993020000  | C                                                                                  | -0.8706420000 | 5.5675820000  | -1.0919480000 |
| C                                                                                 | 0.7155280000  | 3.2915810000  | 0.9893150000  | C                                                                                  | 0.7218290000  | -1.8126450000 | 2.9634540000  |
| H                                                                                 | 1.2494690000  | 3.2355600000  | 1.9451240000  | H                                                                                  | 0.1700890000  | -1.2194190000 | 3.7010540000  |
| H                                                                                 | 1.3494880000  | 3.8264330000  | 0.2727340000  | H                                                                                  | 0.5970780000  | -2.8721840000 | 3.2163360000  |

|   |               |               |               |   |               |               |               |
|---|---------------|---------------|---------------|---|---------------|---------------|---------------|
| H | 0.5624680000  | 2.2745430000  | 0.6117050000  | H | 0.2772320000  | -1.6344420000 | 1.9774590000  |
| C | -0.4557870000 | 5.4245640000  | 1.7261130000  | C | 2.8398030000  | -1.5790090000 | 4.3494760000  |
| H | -1.4147660000 | 5.9460480000  | 1.8161710000  | H | 3.8948260000  | -1.2833650000 | 4.3447670000  |
| H | 0.2032550000  | 6.0279370000  | 1.0923630000  | H | 2.7836140000  | -2.6197810000 | 4.6885220000  |
| H | 0.0055990000  | 5.3746970000  | 2.7183900000  | H | 2.3093090000  | -0.9600920000 | 5.0817390000  |
| C | 0.9685360000  | -0.0959800000 | 3.0411990000  | C | -0.0879880000 | 1.8025190000  | 2.5698990000  |
| H | 1.5779660000  | -0.9914160000 | 3.2155500000  | H | -1.1064200000 | 2.1861970000  | 2.4533990000  |
| H | 1.4933170000  | 0.7656880000  | 3.4692680000  | H | 0.0139110000  | 1.3874830000  | 3.5797870000  |
| H | 0.8692110000  | 0.0545620000  | 1.9614930000  | H | 0.0425980000  | 0.9895860000  | 1.8461130000  |
| C | -0.3303790000 | -0.3692420000 | 5.2104750000  | C | 0.7657020000  | 4.0460000000  | 3.3830270000  |
| H | -1.3205840000 | -0.4979340000 | 5.6604940000  | H | 1.4632880000  | 4.8715260000  | 3.2056050000  |
| H | 0.1255410000  | 0.5343030000  | 5.6299530000  | H | 0.9471310000  | 3.6498440000  | 4.3880270000  |
| H | 0.2905420000  | -1.2207200000 | 5.5110590000  | H | -0.2528670000 | 4.4494200000  | 3.3728150000  |
| C | -5.3178210000 | -2.6459430000 | 0.9440690000  | C | 3.2619200000  | 3.5733710000  | -3.2893420000 |
| H | -5.6142230000 | -2.2463240000 | 1.9203040000  | H | 3.8858590000  | 4.1579360000  | -2.6046150000 |
| H | -5.2510550000 | -3.7362390000 | 1.0337940000  | H | 2.6340210000  | 4.2727120000  | -3.8531090000 |
| H | -6.1088330000 | -2.4175810000 | 0.2210390000  | H | 3.9167540000  | 3.0630050000  | -4.0043880000 |
| C | -3.5801840000 | -2.5769410000 | -0.9095190000 | C | 1.5281650000  | 1.7249060000  | -3.4860020000 |
| H | -4.3652030000 | -2.3527300000 | -1.6409770000 | H | 2.1511680000  | 1.2109360000  | -4.2268030000 |
| H | -3.4295110000 | -3.6618660000 | -0.8945480000 | H | 0.8208320000  | 2.3690570000  | -4.0222650000 |
| H | -2.6460580000 | -2.1172320000 | -1.2489350000 | H | 0.9620940000  | 0.9686390000  | -2.9282000000 |
| C | -5.2607870000 | 2.1097980000  | -2.5215630000 | C | 6.1601400000  | -2.1228650000 | -1.9024250000 |
| H | -5.7415380000 | 2.8301930000  | -1.8510420000 | H | 6.8829680000  | -2.1566300000 | -1.0804420000 |
| H | -5.9296460000 | 1.2505630000  | -2.6432110000 | H | 6.5715960000  | -1.4929700000 | -2.6986320000 |
| C | -5.1496460000 | 2.5837440000  | -3.5031050000 | H | 6.0582670000  | -3.1351290000 | -2.3091850000 |
| H | -3.2164330000 | 0.6508510000  | -2.9111600000 | C | 3.7726300000  | -1.5913070000 | -2.5811420000 |
| H | -2.2726550000 | 0.2887070000  | -2.4784900000 | H | 2.8276320000  | -1.1364890000 | -2.2614510000 |
| H | -2.9885690000 | 1.1244370000  | -3.8735390000 | H | 3.5685800000  | -2.6259640000 | -2.8828100000 |
| H | -3.8622150000 | -0.2148210000 | -3.0952140000 | H | 4.1500380000  | -1.0463180000 | -3.4545710000 |
| H | -3.4657740000 | 3.0844770000  | 2.1931140000  | H | 4.5094300000  | 0.6960220000  | 2.3031090000  |
| H | -3.3305720000 | 1.0694360000  | 3.4826060000  | H | 3.9486700000  | 2.9052210000  | 1.5317170000  |
| C | 2.4854320000  | 0.2898600000  | -0.5661820000 | C | -3.4760820000 | 2.4808820000  | 1.0368440000  |
| H | 2.3350670000  | 0.9692100000  | -1.4118100000 | C | -2.8549110000 | 2.3590290000  | -0.2072960000 |
| C | 1.4548490000  | -0.8140300000 | -0.5808550000 | C | -2.4120010000 | 1.1131680000  | -0.6545670000 |
| C | 0.7993460000  | -1.2275110000 | -1.7445740000 | C | -2.5812490000 | -0.0323810000 | 0.1350480000  |
| H | 1.5314250000  | -1.5074530000 | 0.2583570000  | C | -3.1626760000 | 0.1107290000  | 1.4025190000  |
| H | 1.0009180000  | -0.6803730000 | -2.6675990000 | C | -3.6194490000 | 1.3521760000  | 1.8454240000  |
| C | 3.9301480000  | -0.2555500000 | -0.5968900000 | H | -3.8337490000 | 3.4470670000  | 1.3777900000  |
| H | 4.0578230000  | -0.9172490000 | 0.2726470000  | H | -2.7044830000 | 3.2342060000  | -0.8298140000 |
| C | 4.2391430000  | -1.0815780000 | -1.8814160000 | H | -1.9229130000 | 1.0395640000  | -1.6201630000 |
| H | 5.2682660000  | -0.8920650000 | -2.2131100000 | H | -3.2830260000 | -0.7640710000 | 2.0350380000  |
| H | 3.5868920000  | -0.7171870000 | -2.6844830000 | H | -4.0872080000 | 1.4364420000  | 2.8206140000  |
| C | 4.0484830000  | -2.5921640000 | -1.7045410000 | C | -2.2344130000 | -1.4251680000 | -0.3836000000 |
| H | 4.2480830000  | -3.1190690000 | -2.6432980000 | H | -1.9917000000 | -2.0587870000 | 0.4813620000  |
| H | 4.7355710000  | -2.9903620000 | -0.9475360000 | C | -1.0524940000 | -1.4459950000 | -1.3361660000 |
| H | 3.0275050000  | -2.8353540000 | -1.3973200000 | C | -0.0011210000 | -2.3573690000 | -1.2146470000 |
| C | 4.9288670000  | 0.8831400000  | -0.4649770000 | H | -1.2362520000 | -1.0015930000 | -2.3169850000 |
| O | 4.5943560000  | 2.0564650000  | -0.7005420000 | H | 0.6152720000  | -2.6186420000 | -2.0714270000 |
| C | 6.3427400000  | 0.5813770000  | -0.0728650000 | H | 0.0361820000  | -3.0634250000 | -0.3870000000 |
| C | 6.7803280000  | -0.7102590000 | 0.2560550000  | C | -3.4956190000 | -2.0783870000 | -1.0687350000 |
| C | 7.2607730000  | 1.6418490000  | -0.0390130000 | H | -3.7644670000 | -1.4432270000 | -1.9208230000 |
| C | 8.1104000000  | -0.9358740000 | 0.6104850000  | C | -3.2045840000 | -3.5086440000 | -1.5955470000 |
| H | 6.0920670000  | -1.5471520000 | 0.2361060000  | H | -4.0643100000 | -4.1532380000 | -1.3827400000 |
| C | 8.5882770000  | 1.4168940000  | 0.3158520000  | H | -2.3670780000 | -3.9357500000 | -1.0327920000 |
| H | 6.9107020000  | 2.6347850000  | -0.2947540000 | C | -2.9032990000 | -3.5537870000 | -3.0973660000 |
| C | 9.0156280000  | 0.1264410000  | 0.6406210000  | H | -2.7271020000 | -4.5845050000 | -3.4234330000 |
| H | 8.4388110000  | -1.9385470000 | 0.8613060000  | H | -3.7463890000 | -3.1589750000 | -3.6770210000 |
| H | 9.2900570000  | 2.2432890000  | 0.3383360000  | H | -2.0138170000 | -2.9679280000 | -3.3473930000 |
| H | 10.0500710000 | -0.0502260000 | 0.9141900000  | C | -4.6395620000 | -2.1161160000 | -0.0678950000 |
| H | -1.5965010000 | 5.5443780000  | -3.1626160000 | O | -4.6207440000 | -2.9797900000 | 0.8301720000  |
| C | 0.1556480000  | -2.5496350000 | -1.9335180000 | C | -5.7657950000 | -1.1382860000 | -0.1268440000 |
| C | -0.3603870000 | -2.8828700000 | -3.1979330000 | C | -5.7812140000 | -0.0346670000 | -0.9917760000 |
| C | 0.0152710000  | -3.4892830000 | -0.8941910000 | C | -6.8317250000 | -1.3167270000 | 0.7693640000  |
| C | -0.9890620000 | -4.1081100000 | -3.4207760000 | C | -6.8373150000 | 0.8752880000  | -0.9541310000 |
| H | -0.2716770000 | -2.1646220000 | -4.0087160000 | H | -4.9609230000 | 0.1453850000  | -1.6747030000 |
| C | -0.6054370000 | -4.7151670000 | -1.1201700000 | C | -7.8905010000 | -0.4144010000 | 0.7996440000  |

|   |               |               |               |   |               |               |               |
|---|---------------|---------------|---------------|---|---------------|---------------|---------------|
| H | 0.3633850000  | -3.2510560000 | 0.1054160000  | H | -6.8053480000 | -2.1674040000 | 1.4395490000  |
| C | -1.1110780000 | -5.0348540000 | -2.3835990000 | C | -7.8933310000 | 0.6866870000  | -0.0615640000 |
| H | -1.3825280000 | -4.3388140000 | -4.4055530000 | H | -6.8299860000 | 1.7337920000  | -1.6165070000 |
| H | -0.7040550000 | -5.4203220000 | -0.3008220000 | H | -8.7084240000 | -0.5628650000 | 1.4962790000  |
| H | -1.5960310000 | -5.9902110000 | -2.5551990000 | H | -8.7132410000 | 1.3962110000  | -0.0340800000 |
| H | 2.3700410000  | 0.9001040000  | 0.3364450000  | H | 3.8381720000  | -5.3874120000 | 1.1020290000  |

|  |  |  |  |  |  |  |  |
|--|--|--|--|--|--|--|--|
|  |  |  |  |  |  |  |  |
|--|--|--|--|--|--|--|--|

| IM1 |  |  |  | IM2 |  |  |  |
|-----|--|--|--|-----|--|--|--|
|-----|--|--|--|-----|--|--|--|

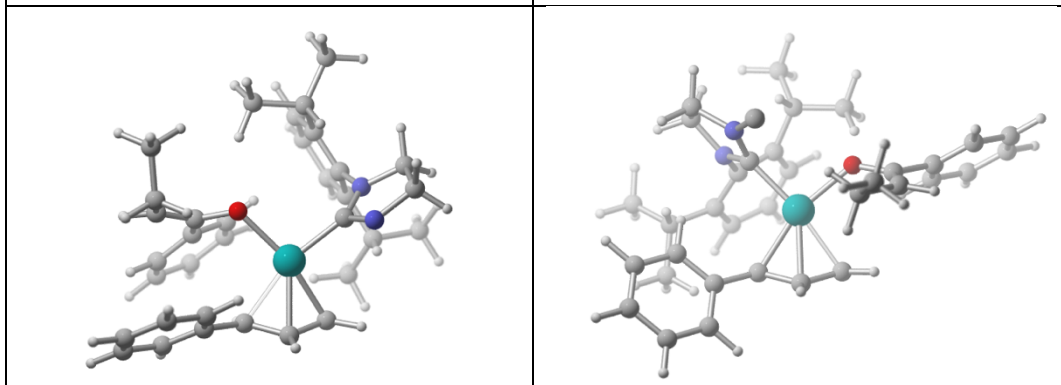

|                                   |                |                                   |                |
|-----------------------------------|----------------|-----------------------------------|----------------|
| Gas phase energy=                 | -459.571943541 | Gas phase energy=                 | -459.565913387 |
| Gas phase free energy correction= | 0.871378       | Gas phase free energy correction= | 0.873628       |
| SMD energy=                       | -2100.66593936 | SMD energy=                       | -2100.65813069 |

|    |               |               |               |    |               |               |               |
|----|---------------|---------------|---------------|----|---------------|---------------|---------------|
| C  | 3.4202840000  | -0.6588630000 | -1.7850530000 | C  | 2.8383160000  | 2.0483440000  | -1.6394500000 |
| C  | 2.6089810000  | 0.0941910000  | -1.0104280000 | C  | 2.9495190000  | 0.7670200000  | -1.2172830000 |
| C  | 1.8008950000  | -1.1040420000 | 2.0171070000  | C  | 0.4281570000  | -0.1350930000 | -3.2034190000 |
| H  | 2.2929760000  | -0.1918940000 | 2.3575300000  | H  | 0.5502380000  | -1.2148540000 | -3.2658600000 |
| C  | 0.5218240000  | -1.4086540000 | 2.5249330000  | C  | -0.8322870000 | 0.4361410000  | -3.0075610000 |
| C  | -0.3817970000 | -0.3451640000 | 2.7976470000  | C  | -1.8053930000 | -0.2285900000 | -2.1957630000 |
| H  | 0.1522680000  | -2.4296200000 | 2.4601420000  | H  | -0.9779090000 | 1.4917740000  | -3.2242610000 |
| H  | 0.0083010000  | 0.5879310000  | 3.2012800000  | H  | -1.8393950000 | -1.3210340000 | -2.2434110000 |
| Pd | 0.1780080000  | -0.2103350000 | 0.7421960000  | Pd | 0.0169480000  | -0.0274790000 | -1.0436280000 |
| C  | 2.6816850000  | -2.1404930000 | 1.4350000000  | C  | -1.5495630000 | 0.2709390000  | 2.9910310000  |
| C  | 4.0548110000  | -2.1349270000 | 1.7174230000  | C  | -1.6609160000 | -1.2461930000 | 2.7822680000  |
| C  | 2.1721640000  | -3.1268060000 | 0.5749440000  | H  | -1.0599740000 | 0.5522160000  | 3.9235200000  |
| C  | 4.8992050000  | -3.0953410000 | 1.1610710000  | H  | -0.9938820000 | -1.8137610000 | 3.4416980000  |
| H  | 4.4577410000  | -1.3669940000 | 2.3708930000  | C  | -0.6628070000 | -0.2605140000 | 0.8730790000  |
| C  | 3.0148780000  | -4.0901380000 | 0.0250260000  | N  | -0.7354100000 | 0.6884820000  | 1.8275920000  |
| H  | 1.1217790000  | -3.1041980000 | 0.2959090000  | N  | -1.2264430000 | -1.3969610000 | 1.3758410000  |
| C  | 4.3814340000  | -4.0773920000 | 0.3139640000  | C  | -1.0151230000 | -2.7013980000 | 0.7998630000  |
| H  | 5.9609430000  | -3.0754410000 | 1.3846760000  | C  | -2.0710310000 | -3.3739940000 | 0.1537160000  |
| H  | 2.6098860000  | -4.8339470000 | -0.6531480000 | C  | 0.2583610000  | -3.2947500000 | 0.9363620000  |
| H  | 5.0393130000  | -4.8194630000 | -0.1260820000 | C  | -1.7901330000 | -4.5875610000 | -0.4843290000 |
| H  | -1.3964060000 | -0.5730100000 | 3.0993220000  | C  | 0.4958270000  | -4.5063340000 | 0.2775690000  |
| C  | -3.9402740000 | 0.2402210000  | -0.5228580000 | C  | -0.5098110000 | -5.1344150000 | -0.4513380000 |
| C  | -3.4962620000 | 1.7100740000  | -0.6398960000 | H  | -2.5852470000 | -5.1154540000 | -1.0010950000 |
| H  | -4.3052890000 | -0.1735450000 | -1.4678190000 | H  | 1.4742730000  | -4.9694940000 | 0.3532410000  |
| H  | -3.6060120000 | 2.1121840000  | -1.6510440000 | C  | -0.1061780000 | 1.9841460000  | 1.8288170000  |
| C  | -1.6364330000 | 0.4052320000  | 0.0242370000  | C  | 1.2468440000  | 2.0859880000  | 2.2261570000  |
| N  | -2.6926180000 | -0.4379770000 | -0.1156230000 | C  | -0.8664590000 | 3.1178850000  | 1.4965210000  |
| N  | -2.0652270000 | 1.6459500000  | -0.2729310000 | C  | 1.7865150000  | 3.3690580000  | 2.3607350000  |
| C  | -1.2564000000 | 2.8264310000  | -0.3657980000 | C  | -0.2806810000 | 4.3806810000  | 1.6448590000  |
| C  | -1.0224850000 | 3.5987060000  | 0.7868770000  | C  | 1.0280200000  | 4.5067840000  | 2.0931740000  |
| C  | -0.7635880000 | 3.2043630000  | -1.6293730000 | H  | 2.8226170000  | 3.4818500000  | 2.5652360000  |
| C  | -0.3118340000 | 4.7950080000  | 0.6437030000  | H  | -0.8512870000 | 5.2683330000  | 1.3892760000  |
| C  | -0.0483290000 | 4.4035100000  | -1.7224210000 | C  | 2.1181750000  | 0.8550270000  | 2.4437590000  |
| C  | 0.1685440000  | 5.1970190000  | -0.6002040000 | H  | 1.8121930000  | 0.1247750000  | 1.6911000000  |
| H  | -0.1229930000 | 5.4143200000  | 1.5147510000  | C  | -2.2573790000 | 3.0023170000  | 0.9008720000  |
| H  | 0.3531070000  | 4.7114870000  | -2.6821990000 | H  | -2.5282870000 | 1.9444480000  | 0.8915240000  |
| C  | -2.5524610000 | -1.8672270000 | -0.1553220000 | C  | 1.3192070000  | -2.7354350000 | 1.8754440000  |
| C  | -2.1108830000 | -2.4517860000 | -1.3572530000 | H  | 0.9873740000  | -1.7541620000 | 2.2242980000  |

|   |               |               |               |   |               |               |               |
|---|---------------|---------------|---------------|---|---------------|---------------|---------------|
| C | -2.8443690000 | -2.6426810000 | 0.9835660000  | C | -3.5083770000 | -2.8870860000 | 0.2429550000  |
| C | -1.8475530000 | -3.8265680000 | -1.3642060000 | H | -3.4842990000 | -1.8533120000 | 0.5924510000  |
| C | -2.5763370000 | -4.0145680000 | 0.9303830000  | H | -0.3061430000 | -6.0686490000 | -0.9635570000 |
| C | -2.0564660000 | -4.5974400000 | -0.2246610000 | H | 1.4724560000  | 5.4899290000  | 2.2045530000  |
| H | -1.4790370000 | -4.2943490000 | -2.2715350000 | C | -4.2605460000 | -2.9147630000 | -1.0960790000 |
| H | -2.7766600000 | -4.6357730000 | 1.7969410000  | H | -5.2391000000 | -2.4361850000 | -0.9847370000 |
| C | -1.9834900000 | -1.6493320000 | -2.6447770000 | H | -4.4275860000 | -3.9419950000 | -1.4397530000 |
| H | -2.2504170000 | -0.6099770000 | -2.4257200000 | H | -3.7166380000 | -2.3777040000 | -1.8773630000 |
| C | -3.5197410000 | -2.0341230000 | 2.2028530000  | C | -4.2705420000 | -3.7149210000 | 1.2999070000  |
| H | -3.2981200000 | -0.9600480000 | 2.1997200000  | H | -3.7573140000 | -3.6973740000 | 2.2676290000  |
| C | -0.9718280000 | 2.3557850000  | -2.8753740000 | H | -4.3509480000 | -4.7619830000 | 0.9858590000  |
| H | -1.5013120000 | 1.4430160000  | -2.5809260000 | H | -5.2837720000 | -3.3201730000 | 1.4355910000  |
| C | -1.5234690000 | 3.1664170000  | 2.1567920000  | C | -2.2410590000 | 3.4728260000  | -0.5649880000 |
| H | -1.8118150000 | 2.1122230000  | 2.0872130000  | H | -1.9880270000 | 4.5376100000  | -0.6335560000 |
| H | 0.7244220000  | 6.1236500000  | -0.6919300000 | H | -3.2222930000 | 3.3208200000  | -1.0273280000 |
| H | -1.8374570000 | -5.6596790000 | -0.2413840000 | H | -1.4964720000 | 2.9092240000  | -1.1371520000 |
| C | -0.4218680000 | 3.2720220000  | 3.2254370000  | C | -3.3234310000 | 3.7513830000  | 1.7159870000  |
| H | -0.7555760000 | 2.8055010000  | 4.1591630000  | H | -3.3446390000 | 3.4063350000  | 2.7558420000  |
| H | -0.1781620000 | 4.3166260000  | 3.4502750000  | H | -4.3129170000 | 3.5878550000  | 1.2738940000  |
| H | 0.4962520000  | 2.7763440000  | 2.8924680000  | H | -3.1356530000 | 4.8311760000  | 1.7245760000  |
| C | -2.7675780000 | 3.9760160000  | 2.5697360000  | C | 1.9493500000  | 0.2540760000  | 3.8513230000  |
| H | -3.5667130000 | 3.8855240000  | 1.8259430000  | H | 0.9258850000  | -0.0868180000 | 4.0376570000  |
| H | -2.5222870000 | 5.0400060000  | 2.6675930000  | H | 2.2106100000  | 0.9877310000  | 4.6233180000  |
| H | -3.1524460000 | 3.6247500000  | 3.5338570000  | H | 2.6113970000  | -0.6123850000 | 3.9658230000  |
| C | -3.0361530000 | -2.6287590000 | 3.5365770000  | C | 3.6047920000  | 1.1221530000  | 2.1616930000  |
| H | -3.4210550000 | -3.6444630000 | 3.6809510000  | H | 4.1352290000  | 0.1671650000  | 2.0922740000  |
| H | -3.4003730000 | -2.0216940000 | 4.3724160000  | H | 4.0794780000  | 1.7116520000  | 2.9563760000  |
| H | -1.9449610000 | -2.6731260000 | 3.5964450000  | H | 3.7337720000  | 1.6387990000  | 1.2061680000  |
| C | -5.0508800000 | -2.2019370000 | 2.0903690000  | C | 1.4332940000  | -3.6468270000 | 3.1156850000  |
| H | -5.4375830000 | -1.7829790000 | 1.1559550000  | H | 0.4610960000  | -3.7935450000 | 3.6005260000  |
| H | -5.5546360000 | -1.7072300000 | 2.9284540000  | H | 2.1219090000  | -3.2043750000 | 3.8441930000  |
| H | -5.3164000000 | -3.2653260000 | 2.1102040000  | H | 1.8215570000  | -4.6338770000 | 2.8392640000  |
| C | -2.9858670000 | -2.1689180000 | -3.6944640000 | C | 2.6849400000  | -2.5270990000 | 1.2098930000  |
| H | -4.0100530000 | -2.1752750000 | -3.3036980000 | H | 2.6139210000  | -1.7651250000 | 0.4289190000  |
| H | -2.7378620000 | -3.1907990000 | -4.0028790000 | H | 3.0792800000  | -3.4561670000 | 0.7819450000  |
| H | -2.9574760000 | -1.5338630000 | -4.5867030000 | H | 3.4094030000  | -2.1773160000 | 1.9551640000  |
| C | -0.5512050000 | -1.6271620000 | -3.1908460000 | O | 2.0065720000  | 0.0861940000  | -0.5131970000 |
| H | -0.5219990000 | -1.0708110000 | -4.1349190000 | C | 4.1822360000  | -0.0324840000 | -1.4915540000 |
| H | -0.1844310000 | -2.6406480000 | -3.3947290000 | C | 4.0685400000  | -1.3887520000 | -1.8310070000 |
| H | 0.1288980000  | -1.1389260000 | -2.4825870000 | C | 5.4622040000  | 0.5336300000  | -1.4069470000 |
| C | -1.8359520000 | 3.0970030000  | -3.9136290000 | C | 5.2026450000  | -2.1542100000 | -2.0990370000 |
| H | -2.7891320000 | 3.4298570000  | -3.4862580000 | H | 3.0802380000  | -1.8336250000 | -1.8764010000 |
| H | -2.0480360000 | 2.4412430000  | -4.7652580000 | C | 6.5993010000  | -0.2318610000 | -1.6735200000 |
| H | -1.3154000000 | 3.9830800000  | -4.2947330000 | H | 5.5627340000  | 1.5737240000  | -1.1129930000 |
| C | 0.3701160000  | 1.9072560000  | -3.4789300000 | C | 6.4741000000  | -1.5782630000 | -2.0222210000 |
| H | 0.9170560000  | 1.2934550000  | -2.7561140000 | H | 5.0956710000  | -3.2011260000 | -2.3657880000 |
| H | 0.9867450000  | 2.7659180000  | -3.7691050000 | H | 7.5830400000  | 0.2204740000  | -1.5964760000 |
| H | 0.1898850000  | 1.3076190000  | -4.3787990000 | H | 7.3580160000  | -2.1740820000 | -2.2262560000 |
| O | 1.2463380000  | -0.0276150000 | -1.0406000000 | H | 3.6543090000  | 2.4666920000  | -2.2270470000 |
| C | 3.1652580000  | 1.1338270000  | -0.0888910000 | C | 1.6526710000  | 2.9416580000  | -1.3941860000 |
| C | 2.3999860000  | 2.2589140000  | 0.2542710000  | C | 2.0451430000  | 4.4212690000  | -1.2924220000 |
| C | 4.4343850000  | 0.9905500000  | 0.4966790000  | H | 0.9063190000  | 2.8318160000  | -2.2004710000 |
| C | 2.8867700000  | 3.2088620000  | 1.1536100000  | H | 1.1420870000  | 2.6335610000  | -0.4747360000 |
| H | 1.4224070000  | 2.3836820000  | -0.1949110000 | H | 1.1680770000  | 5.0492670000  | -1.1004990000 |
| C | 4.9218470000  | 1.9391320000  | 1.3961590000  | H | 2.5201390000  | 4.7674130000  | -2.2185790000 |
| H | 5.0270040000  | 0.1122520000  | 0.2660510000  | H | 2.7554580000  | 4.5711060000  | -0.4719140000 |
| C | 4.1477760000  | 3.0525900000  | 1.7334950000  | H | -2.6783390000 | -1.6201490000 | 2.9117300000  |
| H | 2.2782500000  | 4.0740230000  | 1.3959870000  | H | -2.5245180000 | 0.7710720000  | 2.9494260000  |
| H | 5.9024920000  | 1.8036050000  | 1.8422340000  | C | -3.1270030000 | 0.4300730000  | -1.9618850000 |
| H | 4.5230760000  | 3.7880770000  | 2.4380480000  | C | -3.7951740000 | 1.0572010000  | -3.0264360000 |
| H | 4.4847990000  | -0.4350880000 | -1.7939030000 | C | -3.7477850000 | 0.4262020000  | -0.7077930000 |
| C | 2.9534780000  | -1.7732960000 | -2.6766400000 | C | -5.0389930000 | 1.6625850000  | -2.8375690000 |
| C | 2.7106510000  | -1.3267640000 | -4.1297270000 | H | -3.3402950000 | 1.0595110000  | -4.0125310000 |
| H | 3.7020310000  | -2.5777570000 | -2.6676200000 | C | -4.9959620000 | 1.0163850000  | -0.5156530000 |
| H | 2.0315590000  | -2.1987560000 | -2.2658600000 | H | -3.2268180000 | -0.0239930000 | 0.1272190000  |
| H | 2.3638130000  | -2.1604460000 | -4.7527860000 | C | -5.6472930000 | 1.6420000000  | -1.5810800000 |

|                                                                                   |               |               |               |                                                                                    |               |               |               |
|-----------------------------------------------------------------------------------|---------------|---------------|---------------|------------------------------------------------------------------------------------|---------------|---------------|---------------|
| H                                                                                 | 3.6296550000  | -0.9270030000 | -4.5739470000 | H                                                                                  | -5.5344720000 | 2.1440910000  | -3.6739290000 |
| H                                                                                 | 1.9543560000  | -0.5361660000 | -4.1582040000 | H                                                                                  | -5.4527400000 | 1.0023840000  | 0.4689720000  |
| H                                                                                 | -4.0285900000 | 2.3689800000  | 0.0509280000  | H                                                                                  | -6.6154350000 | 2.1083790000  | -1.4341450000 |
| H                                                                                 | -4.7133200000 | 0.0989930000  | 0.2364610000  | H                                                                                  | 1.2410140000  | 0.4610830000  | -3.6028830000 |
| <b>IM1-eta1</b>                                                                   |               |               |               | <b>IM2-eta1</b>                                                                    |               |               |               |
| 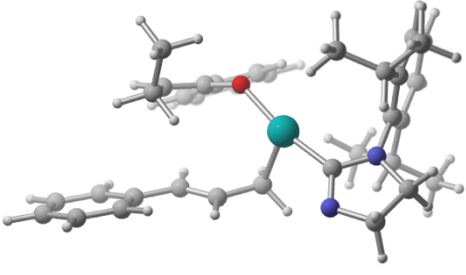 |               |               |               |  |               |               |               |
| Gas phase energy=-459.557806479                                                   |               |               |               | Gas phase energy=-459.548605304                                                    |               |               |               |
| Gas phase free energy correction= 0.865423                                        |               |               |               | Gas phase free energy correction= 0.869216                                         |               |               |               |
| SMD energy=-2100.65073592                                                         |               |               |               | SMD energy=-2100.63777372                                                          |               |               |               |
| C                                                                                 | 2.8261930000  | 2.1428670000  | -1.7849400000 | C                                                                                  | -2.8646410000 | -3.8823060000 | 0.0960950000  |
| C                                                                                 | 1.6730810000  | 2.5337560000  | -1.1955150000 | C                                                                                  | -2.7065100000 | -2.5437840000 | 0.1968740000  |
| C                                                                                 | 3.1150310000  | 0.5946160000  | 0.8661650000  | C                                                                                  | 1.0506190000  | -3.1864560000 | -1.8012460000 |
| H                                                                                 | 3.0450720000  | 1.6427910000  | 1.1493720000  | H                                                                                  | 0.2093510000  | -3.7973810000 | -1.4817530000 |
| C                                                                                 | 2.0080160000  | -0.1722960000 | 0.9514730000  | C                                                                                  | 0.9418350000  | -1.8539500000 | -1.9003000000 |
| C                                                                                 | 0.6818870000  | 0.3485090000  | 1.3144650000  | C                                                                                  | -0.3099170000 | -1.1103440000 | -1.6007120000 |
| H                                                                                 | 2.0685740000  | -1.2341670000 | 0.7252740000  | H                                                                                  | 1.8046890000  | -1.2717220000 | -2.2152810000 |
| H                                                                                 | 0.7061110000  | 1.3938720000  | 1.6413090000  | H                                                                                  | -1.1607970000 | -1.7999820000 | -1.5997960000 |
| Pd                                                                                | -0.4346480000 | 0.3973110000  | -0.4158360000 | Pd                                                                                 | -0.3018940000 | -0.6152120000 | 0.4014230000  |
| C                                                                                 | 4.4448160000  | 0.1393310000  | 0.4352240000  | C                                                                                  | 3.0886660000  | 2.0132570000  | 1.0648940000  |
| C                                                                                 | 5.5559720000  | 0.9738590000  | 0.6470920000  | C                                                                                  | 1.8797640000  | 2.8433330000  | 1.5232720000  |
| C                                                                                 | 4.6533460000  | -1.0926700000 | -0.2114580000 | H                                                                                  | 3.6768480000  | 1.6192780000  | 1.9014630000  |
| C                                                                                 | 6.8336020000  | 0.5890650000  | 0.2421950000  | H                                                                                  | 1.9093020000  | 3.0943930000  | 2.5865210000  |
| H                                                                                 | 5.4079930000  | 1.9340340000  | 1.1339280000  | C                                                                                  | 1.1098080000  | 0.8269180000  | 0.5364390000  |
| C                                                                                 | 5.9308230000  | -1.4788490000 | -0.6127050000 | N                                                                                  | 2.4539850000  | 0.8827480000  | 0.3436660000  |
| H                                                                                 | 3.8079060000  | -1.7391450000 | -0.4239100000 | C                                                                                  | 0.7609300000  | 1.9277000000  | 1.2455380000  |
| C                                                                                 | 7.0281080000  | -0.6424380000 | -0.3873170000 | C                                                                                  | -0.5417680000 | 2.1218650000  | 1.8188720000  |
| H                                                                                 | 7.6761400000  | 1.2506840000  | 0.4155730000  | C                                                                                  | -1.4935530000 | 2.9002500000  | 1.1374780000  |
| H                                                                                 | 6.0707500000  | -2.4311640000 | -1.1146400000 | C                                                                                  | -0.8211820000 | 1.5197210000  | 3.0628600000  |
| H                                                                                 | 8.0203850000  | -0.9433450000 | -0.7068260000 | C                                                                                  | -2.7520110000 | 3.0597290000  | 1.7266790000  |
| H                                                                                 | 0.1393650000  | -0.2681080000 | 2.0340570000  | C                                                                                  | -2.1005090000 | 1.6878090000  | 3.6029980000  |
| C                                                                                 | -2.6342790000 | -3.0626470000 | 0.9282990000  | C                                                                                  | -3.0585190000 | 2.4500950000  | 2.9408590000  |
| C                                                                                 | -3.7207260000 | -1.9729550000 | 0.9293830000  | H                                                                                  | -3.5051750000 | 3.6580020000  | 1.2250530000  |
| H                                                                                 | -2.7804700000 | -3.8061330000 | 0.1360910000  | H                                                                                  | -2.3492140000 | 1.2158510000  | 4.5480460000  |
| H                                                                                 | -4.5840790000 | -2.2243510000 | 0.3086770000  | C                                                                                  | 3.2810200000  | -0.1691430000 | -0.1795540000 |
| C                                                                                 | -1.6616620000 | -1.0125560000 | 0.2666080000  | C                                                                                  | 3.4026600000  | -1.3834270000 | 0.5291890000  |
| N                                                                                 | -1.4059390000 | -2.2859470000 | 0.6523330000  | C                                                                                  | 3.9984050000  | 0.0596690000  | -1.3737730000 |
| N                                                                                 | -2.9951250000 | -0.8203450000 | 0.3670370000  | C                                                                                  | 4.2252830000  | -2.3794490000 | -0.0087680000 |
| C                                                                                 | -3.6580070000 | 0.4086630000  | 0.0453300000  | C                                                                                  | 4.8122520000  | -0.9654300000 | -1.8666260000 |
| C                                                                                 | -3.7567680000 | 1.4162750000  | 1.0197510000  | C                                                                                  | 4.9185970000  | -2.1805530000 | -1.1972970000 |
| C                                                                                 | -4.1802230000 | 0.5657230000  | -1.2526270000 | H                                                                                  | 4.3228730000  | -3.3257690000 | 0.5124170000  |
| C                                                                                 | -4.4293320000 | 2.5946060000  | 0.6768080000  | H                                                                                  | 5.3647480000  | -0.8129320000 | -2.7879000000 |
| C                                                                                 | -4.8373270000 | 1.7620030000  | -1.5554460000 | C                                                                                  | 2.7221480000  | -1.6465800000 | 1.8666110000  |
| C                                                                                 | -4.9678170000 | 2.7645830000  | -0.5958030000 | H                                                                                  | 2.0073740000  | -0.8422760000 | 2.0550570000  |
| H                                                                                 | -4.5198230000 | 3.3911600000  | 1.4086320000  | C                                                                                  | 3.9485790000  | 1.3839760000  | -2.1271920000 |
| H                                                                                 | -5.2415910000 | 1.9199150000  | -2.5496250000 | H                                                                                  | 3.1285670000  | 1.9811860000  | -1.7104620000 |
| C                                                                                 | -0.1338390000 | -2.9370320000 | 0.5420400000  | C                                                                                  | 0.2190710000  | 0.7120390000  | 3.8278070000  |
| C                                                                                 | 0.3745780000  | -3.2439430000 | -0.7360450000 | H                                                                                  | 1.1453750000  | 0.7081580000  | 3.2421700000  |
| C                                                                                 | 0.5705980000  | -3.2628450000 | 1.7183120000  | C                                                                                  | -1.1705450000 | 3.5753900000  | -0.1848490000 |
| C                                                                                 | 1.6269500000  | -3.8652240000 | -0.8123110000 | H                                                                                  | -0.2550240000 | 3.1200650000  | -0.5795760000 |

|   |               |               |               |   |               |               |               |
|---|---------------|---------------|---------------|---|---------------|---------------|---------------|
| C | 1.8076930000  | -3.9034390000 | 1.5927800000  | H | -4.0465030000 | 2.5691780000  | 3.3716770000  |
| C | 2.3374800000  | -4.1945870000 | 0.3386810000  | H | 5.5480510000  | -2.9678820000 | -1.5974730000 |
| H | 2.0489230000  | -4.0964100000 | -1.7851870000 | C | -2.2674950000 | 3.3528210000  | -1.2346710000 |
| H | 2.3724160000  | -4.1568700000 | 2.4836420000  | H | -1.9650150000 | 3.7939880000  | -2.1886810000 |
| C | -0.3900310000 | -2.9558240000 | -2.0226140000 | H | -3.2152640000 | 3.8176260000  | -0.9385650000 |
| H | -1.3158410000 | -2.4289720000 | -1.7673550000 | H | -2.4405210000 | 2.2853150000  | -1.3979690000 |
| C | 0.0253850000  | -2.9385350000 | 3.1024030000  | C | -0.9108020000 | 5.0799280000  | 0.0307160000  |
| H | -0.8238020000 | -2.2560000000 | 2.9719210000  | H | -0.1236930000 | 5.2514930000  | 0.7739050000  |
| C | -3.9599840000 | -0.4982310000 | -2.3198290000 | H | -1.8190400000 | 5.5801140000  | 0.3873120000  |
| H | -3.7131030000 | -1.4386760000 | -1.8117690000 | H | -0.6092860000 | 5.5531730000  | -0.9102580000 |
| C | -3.1257950000 | 1.2692140000  | 2.3959860000  | C | 3.6735200000  | 1.1964570000  | -3.6309420000 |
| H | -2.5801400000 | 0.3189260000  | 2.4178220000  | H | 4.5261910000  | 0.7280690000  | -4.1344200000 |
| H | -5.4794690000 | 3.6874220000  | -0.8463550000 | H | 3.5064970000  | 2.1695410000  | -4.1056990000 |
| H | 3.3071520000  | -4.6733720000 | 0.2582870000  | H | 2.7908600000  | 0.5762620000  | -3.8086240000 |
| C | -2.0979200000 | 2.3857290000  | 2.6530030000  | C | 5.2629350000  | 2.1685720000  | -1.9313590000 |
| H | -1.5613150000 | 2.2002010000  | 3.5899150000  | H | 5.5018120000  | 2.3093500000  | -0.8720330000 |
| H | -2.5845280000 | 3.3646110000  | 2.7347320000  | H | 5.1957950000  | 3.1533080000  | -2.4071050000 |
| H | -1.3666970000 | 2.4371390000  | 1.8409780000  | H | 6.1005740000  | 1.6284070000  | -2.3872340000 |
| C | -4.1946550000 | 1.2255140000  | 3.5033320000  | C | 3.7507920000  | -1.6210780000 | 3.0131910000  |
| H | -4.9130710000 | 0.4158160000  | 3.3329890000  | H | 4.2954500000  | -0.6702550000 | 3.0388410000  |
| H | -4.7548320000 | 2.1667850000  | 3.5442810000  | H | 4.4863600000  | -2.4259860000 | 2.9005180000  |
| H | -3.7240940000 | 1.0718320000  | 4.4806800000  | H | 3.2452400000  | -1.7560550000 | 3.9762690000  |
| C | 1.0616420000  | -2.2230390000 | 3.9890090000  | C | 1.9180020000  | -2.9576050000 | 1.8655710000  |
| H | 1.8792950000  | -2.8965760000 | 4.2685230000  | H | 1.3716460000  | -3.0624730000 | 2.8083470000  |
| H | 0.5872170000  | -1.8804020000 | 4.9151060000  | H | 2.5706010000  | -3.8319620000 | 1.7600230000  |
| H | 1.4984420000  | -1.3572290000 | 3.4829580000  | H | 1.1874170000  | -2.9670610000 | 1.0508930000  |
| C | -0.4788510000 | -4.2156330000 | 3.8046820000  | C | 0.5443800000  | 1.3698500000  | 5.1820120000  |
| H | -1.2130120000 | -4.7545370000 | 3.1962370000  | H | 0.8683630000  | 2.4081320000  | 5.0507290000  |
| H | -0.9400650000 | -3.9689160000 | 4.7673460000  | H | 1.3440120000  | 0.8182460000  | 5.6887740000  |
| H | 0.3552820000  | -4.9010590000 | 3.9945550000  | H | -0.3316450000 | 1.3724060000  | 5.8401320000  |
| C | -0.7884290000 | -4.2679770000 | -2.7255680000 | C | -0.2164180000 | -0.7519920000 | 4.0147540000  |
| H | -1.3775770000 | -4.9115140000 | -2.0627760000 | H | -0.4677790000 | -1.2376770000 | 3.0643630000  |
| H | 0.0968840000  | -4.8312580000 | -3.0415700000 | H | -1.1047500000 | -0.8195460000 | 4.6529260000  |
| H | -1.3853990000 | -4.0506330000 | -3.6183750000 | H | 0.5863480000  | -1.3246330000 | 4.4933790000  |
| C | 0.4060190000  | -2.0394350000 | -2.9666300000 | O | -1.6612660000 | -2.0095580000 | 0.8801840000  |
| H | -0.1728290000 | -1.8279110000 | -3.8720100000 | C | -3.6699720000 | -1.5693920000 | -0.4032690000 |
| H | 1.3510630000  | -2.5009820000 | -3.2745240000 | C | -3.7702270000 | -0.2729600000 | 0.1242660000  |
| H | 0.6383780000  | -1.0852410000 | -2.4820820000 | C | -4.4549410000 | -1.8976410000 | -1.5212770000 |
| C | -5.2081160000 | -0.7571420000 | -3.1791320000 | C | -4.6344280000 | 0.6629080000  | -0.4435230000 |
| H | -6.0772830000 | -0.9928770000 | -2.5563250000 | H | -3.1644140000 | -0.0038990000 | 0.9826570000  |
| H | -5.0280400000 | -1.6002020000 | -3.8548960000 | C | -5.3213840000 | -0.9619300000 | -2.0874360000 |
| H | -5.4597210000 | 0.1096250000  | -3.7998280000 | H | -4.3637240000 | -2.8825940000 | -1.9677130000 |
| C | -2.7524630000 | -0.1233740000 | -3.2008200000 | C | -5.4123390000 | 0.3259970000  | -1.5530590000 |
| H | -1.8389150000 | -0.0030920000 | -2.6045230000 | H | -4.6945420000 | 1.6592260000  | -0.0176320000 |
| H | -2.9289370000 | 0.8244250000  | -3.7210020000 | H | -5.9144160000 | -1.2342680000 | -2.9550070000 |
| H | -2.5644540000 | -0.9013990000 | -3.9493780000 | H | -6.0795240000 | 1.0574820000  | -1.9974970000 |
| O | 0.5244430000  | 1.8469720000  | -1.3881820000 | H | -3.7676400000 | -4.2795200000 | -0.3644300000 |
| C | 1.5651110000  | 3.6978790000  | -0.2650760000 | C | -1.8776410000 | -4.8817560000 | 0.6303930000  |
| C | 0.2922550000  | 4.1787040000  | 0.0794890000  | H | -0.9371200000 | -4.3651250000 | 0.8537120000  |
| C | 2.6873680000  | 4.2990950000  | 0.3300530000  | C | -1.6352410000 | -6.0437530000 | -0.3459870000 |
| C | 0.1445180000  | 5.2304250000  | 0.9839570000  | H | -1.2431840000 | -5.6750540000 | -1.3010820000 |
| H | -0.5734980000 | 3.7085030000  | -0.3720320000 | H | -0.9174200000 | -6.7641210000 | 0.0623080000  |
| C | 2.5399810000  | 5.3544390000  | 1.2304770000  | H | -2.5680730000 | -6.5802650000 | -0.5574700000 |
| H | 3.6826270000  | 3.9310990000  | 0.1010930000  | H | 1.7615390000  | 3.7683190000  | 0.9496300000  |
| C | 1.2671980000  | 5.8251480000  | 1.5639640000  | H | 3.7551770000  | 2.5720140000  | 0.4079840000  |
| H | -0.8501270000 | 5.5859740000  | 1.2354250000  | H | -2.2328320000 | -5.2922760000 | 1.5884960000  |
| H | 3.4198120000  | 5.8035060000  | 1.6805430000  | C | -0.6105160000 | 0.0668500000  | -2.4786070000 |
| H | 1.1536390000  | 6.6403860000  | 2.2712670000  | C | -1.8354380000 | 0.1257090000  | -3.1611470000 |
| H | 3.7226330000  | 2.7461430000  | -1.6714900000 | C | 0.3211130000  | 1.0914770000  | -2.7020640000 |
| C | 2.9266730000  | 0.8886080000  | -2.6094580000 | C | -2.1005360000 | 1.1524130000  | -4.0690190000 |
| C | 2.2401320000  | 0.9877790000  | -3.9834840000 | H | -2.5817460000 | -0.6408930000 | -2.9810230000 |
| H | 3.9832140000  | 0.6251860000  | -2.7408630000 | C | 0.0623510000  | 2.1151090000  | -3.6108780000 |
| H | 2.4669380000  | 0.0620940000  | -2.0473020000 | H | 1.2520850000  | 1.0823010000  | -2.1479100000 |
| H | 2.3280620000  | 0.0432020000  | -4.5348350000 | C | -1.1483270000 | 2.1441420000  | -4.3095300000 |
| H | 2.6899840000  | 1.7815610000  | -4.5899490000 | H | -3.0538230000 | 1.1732410000  | -4.5863820000 |
| H | 1.1789620000  | 1.2190700000  | -3.8488510000 | H | 0.8065590000  | 2.8888370000  | -3.7763180000 |

|   |               |               |              |   |               |               |               |
|---|---------------|---------------|--------------|---|---------------|---------------|---------------|
| H | -4.0769910000 | -1.7326770000 | 1.9376110000 | H | -1.3500440000 | 2.9363730000  | -5.0231540000 |
| H | -2.5571970000 | -3.5851050000 | 1.8826470000 | H | 1.9837210000  | -3.6951740000 | -2.0189920000 |

| TS-inner-branched (or TS2) | TS-inner-linear |
|----------------------------|-----------------|
|----------------------------|-----------------|

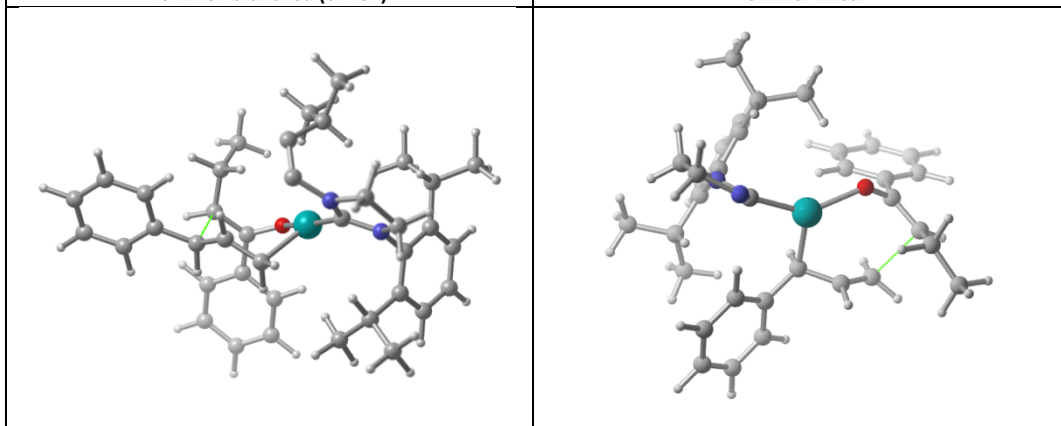

|                                                                                                              |                                                                                                              |
|--------------------------------------------------------------------------------------------------------------|--------------------------------------------------------------------------------------------------------------|
| Gas phase energy= -459.539803013<br>Gas phase free energy correction= 0.869345<br>SMD energy= -2100.63186908 | Gas phase energy= -459.523872303<br>Gas phase free energy correction= 0.868289<br>SMD energy= -2100.61314516 |
|--------------------------------------------------------------------------------------------------------------|--------------------------------------------------------------------------------------------------------------|

|    |           |           |           |    |               |               |               |
|----|-----------|-----------|-----------|----|---------------|---------------|---------------|
| C  | 3.003507  | 1.178005  | -1.446355 | C  | -2.9085020000 | -2.8182690000 | -1.9607880000 |
| C  | 1.987788  | 2.134230  | -1.252318 | C  | -2.9895890000 | -2.0315630000 | -0.8164490000 |
| C  | 3.195684  | 0.478187  | 0.501530  | C  | -2.1663210000 | -1.0898290000 | -3.1510250000 |
| H  | 3.263117  | 1.479711  | 0.924458  | H  | -2.9581020000 | -0.4000680000 | -2.8731070000 |
| C  | 2.053566  | -0.264947 | 0.871096  | C  | -0.8437380000 | -0.7729810000 | -2.8624280000 |
| C  | 0.855215  | 0.302560  | 1.347197  | C  | -0.3966200000 | 0.3728100000  | -2.1052450000 |
| H  | 2.075261  | -1.344365 | 0.748484  | H  | -0.0630260000 | -1.3710500000 | -3.3311470000 |
| H  | 0.891173  | 1.348168  | 1.663324  | H  | -1.2025860000 | 1.0756160000  | -1.8460340000 |
| Pd | -0.443214 | 0.472884  | -0.400432 | Pd | -0.2433180000 | -0.5987930000 | -0.2438770000 |
| C  | 4.525052  | -0.189071 | 0.397138  | C  | 2.9839740000  | 0.7810870000  | 2.2625180000  |
| C  | 5.686064  | 0.566824  | 0.629243  | C  | 2.0096420000  | 1.9668060000  | 2.3850490000  |
| C  | 4.670374  | -1.545769 | 0.063064  | H  | 3.1353080000  | 0.2494730000  | 3.2056690000  |
| C  | 6.951954  | -0.011770 | 0.537861  | H  | 1.5893730000  | 2.0706200000  | 3.3907930000  |
| H  | 5.587553  | 1.618101  | 0.888138  | C  | 1.1310480000  | 0.4139570000  | 0.8155710000  |
| C  | 5.936251  | -2.124347 | -0.028046 | N  | 2.3043030000  | -0.0965380000 | 1.2843610000  |
| H  | 3.792351  | -2.151952 | -0.134860 | N  | 0.9415890000  | 1.6103670000  | 1.4298580000  |
| C  | 7.083267  | -1.362528 | 0.208717  | C  | -0.3047830000 | 2.3256320000  | 1.4321980000  |
| H  | 7.834964  | 0.590019  | 0.726852  | C  | -0.4730040000 | 3.4388300000  | 0.5885740000  |
| H  | 6.028227  | -3.174482 | -0.286774 | C  | -1.3207450000 | 1.9056500000  | 2.3156280000  |
| H  | 8.066100  | -1.815977 | 0.135542  | C  | -1.7024200000 | 4.1075290000  | 0.6128650000  |
| H  | 0.223620  | -0.320654 | 1.975178  | C  | -2.5342830000 | 2.6020320000  | 2.3045120000  |
| C  | -2.933354 | -2.764355 | 1.035236  | C  | -2.7278520000 | 3.6887500000  | 1.4562840000  |
| C  | -3.885676 | -1.572985 | 1.220676  | H  | -1.8588620000 | 4.9620480000  | -0.0369860000 |
| H  | -3.255548 | -3.440852 | 0.233923  | H  | -3.3352220000 | 2.2872970000  | 2.9663380000  |
| H  | -4.852926 | -1.712967 | 0.731908  | C  | 2.7860490000  | -1.4302600000 | 1.0445540000  |
| C  | -1.838931 | -0.785115 | 0.311738  | C  | 2.0933440000  | -2.5321120000 | 1.6029470000  |
| N  | -1.673419 | -2.097213 | 0.645788  | C  | 3.9750730000  | -1.6100700000 | 0.3122400000  |
| N  | -3.131038 | -0.479341 | 0.581391  | C  | 2.6326050000  | -3.8088760000 | 1.4196930000  |
| C  | -3.726795 | 0.803677  | 0.362969  | C  | 4.4849130000  | -2.9072650000 | 0.1733360000  |
| C  | -3.592969 | 1.806436  | 1.337729  | C  | 3.8226210000  | -3.9982420000 | 0.7214400000  |
| C  | -4.439839 | 1.013942  | -0.832746 | H  | 2.1176370000  | -4.6691070000 | 1.8308970000  |
| C  | -4.215838 | 3.038000  | 1.103615  | H  | 5.4072510000  | -3.0628870000 | -0.3772050000 |
| C  | -5.038601 | 2.261570  | -1.031578 | C  | 0.8152760000  | -2.3661700000 | 2.4193630000  |
| C  | -4.933082 | 3.263558  | -0.068010 | H  | 0.2955980000  | -1.4742110000 | 2.0537730000  |
| H  | -4.129095 | 3.830466  | 1.840706  | C  | 4.7280910000  | -0.4554960000 | -0.3363040000 |
| H  | -5.582580 | 2.458752  | -1.949338 | H  | 4.1160980000  | 0.4481490000  | -0.2388300000 |
| C  | -0.496738 | -2.854739 | 0.338034  | C  | -1.1276200000 | 0.7633610000  | 3.3049900000  |
| C  | -0.195459 | -3.134999 | -1.010513 | H  | -0.1380590000 | 0.3275140000  | 3.1362580000  |
| C  | 0.326225  | -3.307488 | 1.388589  | C  | 0.6542210000  | 3.9424140000  | -0.2965930000 |
| C  | 0.983761  | -3.834868 | -1.290365 | H  | 1.3733370000  | 3.1255950000  | -0.4096320000 |
| C  | 1.482874  | -4.024647 | 1.062360  | H  | -3.6762390000 | 4.2160830000  | 1.4584630000  |

|   |           |           |           |   |               |               |               |
|---|-----------|-----------|-----------|---|---------------|---------------|---------------|
| C | 1.818201  | -4.273801 | -0.266022 | H | 4.2278840000  | -4.9971730000 | 0.6008660000  |
| H | 1.245064  | -4.048164 | -2.321981 | C | 0.1750820000  | 4.3372920000  | -1.7020100000 |
| H | 2.137457  | -4.375670 | 1.853265  | H | 1.0342370000  | 4.4617230000  | -2.3691510000 |
| C | -1.132253 | -2.764368 | -2.154675 | H | -0.3794550000 | 5.2831970000  | -1.6875560000 |
| H | -1.949572 | -2.158537 | -1.750835 | H | -0.4705240000 | 3.5669590000  | -2.1312120000 |
| C | -0.025454 | -3.060534 | 2.849481  | C | 1.3738750000  | 5.1327950000  | 0.3706040000  |
| H | -0.805853 | -2.289448 | 2.873311  | H | 1.7436010000  | 4.8780550000  | 1.3696240000  |
| C | -4.491902 | -0.059384 | -1.911570 | H | 0.6883290000  | 5.9819360000  | 0.4779520000  |
| H | -4.245857 | -1.018735 | -1.440622 | C | 2.2237480000  | 5.4543150000  | -0.2418180000 |
| C | -2.776597 | 1.592040  | 2.603287  | C | 4.9439630000  | -0.7020900000 | -1.8405440000 |
| H | -2.307043 | 0.604509  | 2.536344  | H | 5.5973440000  | -1.5643680000 | -2.0127630000 |
| H | -5.404121 | 4.226088  | -0.236547 | H | 5.4167910000  | 0.1694700000  | -2.3055430000 |
| H | 2.727219  | -4.816980 | -0.502339 | H | 3.9924000000  | -0.8832560000 | -2.3486250000 |
| C | -1.641083 | 2.625466  | 2.709451  | C | 6.0738580000  | -0.1998260000 | 0.3700440000  |
| H | -0.982002 | 2.382211  | 3.550222  | H | 5.9396580000  | -0.0294660000 | 1.4437790000  |
| H | -2.034727 | 3.635743  | 2.871074  | H | 6.5721900000  | 0.6757250000  | -0.0610010000 |
| H | -1.043902 | 2.631494  | 1.792137  | H | 6.7427480000  | -1.0602470000 | 0.2529330000  |
| C | -3.669302 | 1.610198  | 3.857615  | C | 1.1410970000  | -2.1349280000 | 3.9069270000  |
| H | -4.461265 | 0.855974  | 3.790904  | H | 1.7821760000  | -1.2580670000 | 4.0486460000  |
| H | -4.147754 | 2.588263  | 3.984852  | H | 1.6592260000  | -3.0047390000 | 4.3275010000  |
| H | -3.073179 | 1.407225  | 4.754313  | H | 0.2178590000  | -1.9762310000 | 4.4758690000  |
| C | 1.166460  | -2.545129 | 3.676303  | C | -0.1762180000 | -3.5256910000 | 2.2476620000  |
| H | 1.935531  | -3.317103 | 3.792139  | H | -1.1247640000 | -3.2657540000 | 2.7272560000  |
| H | 0.828888  | -2.266788 | 4.680798  | H | 0.1880880000  | -4.4512610000 | 2.7085630000  |
| H | 1.633578  | -1.670854 | 3.214580  | H | -0.3871420000 | -3.7044800000 | 1.1896780000  |
| C | -0.589593 | -4.345731 | 3.490889  | C | -1.1507520000 | 1.2911240000  | 4.7532140000  |
| H | -1.434780 | -4.749341 | 2.923527  | H | -0.4132570000 | 2.0882960000  | 4.9002950000  |
| H | -0.920544 | -4.150532 | 4.517036  | H | -0.9273200000 | 0.4789630000  | 5.4541770000  |
| H | 0.183422  | -5.122242 | 3.525396  | H | -2.1365580000 | 1.6959390000  | 5.0086250000  |
| C | -1.754313 | -4.035353 | -2.766485 | C | -2.1598880000 | -0.3602320000 | 3.1130190000  |
| H | -2.262734 | -4.635243 | -2.003436 | H | -2.0906170000 | -0.8089220000 | 2.1171920000  |
| H | -0.986908 | -4.664582 | -3.231795 | H | -3.1831400000 | 0.0100940000  | 3.2449130000  |
| H | -2.483908 | -3.764797 | -3.538064 | H | -1.9948160000 | -1.1482230000 | 3.8574820000  |
| C | -0.440753 | -1.914300 | -3.231138 | O | -1.9239410000 | -1.8520230000 | -0.0881260000 |
| H | -1.142598 | -1.686439 | -4.040652 | C | -4.1848320000 | -1.1899440000 | -0.5248150000 |
| H | 0.419247  | -2.433063 | -3.669598 | C | -4.0130350000 | 0.0912600000  | 0.0230380000  |
| H | -0.090513 | -0.967233 | -2.807948 | C | -5.4853670000 | -1.6428140000 | -0.7927050000 |
| C | -5.882492 | -0.204050 | -2.550482 | C | -5.1163970000 | 0.9017540000  | 0.2859800000  |
| H | -6.655554 | -0.359034 | -1.790439 | H | -3.0105000000 | 0.4475770000  | 0.2370930000  |
| H | -5.892482 | -1.059974 | -3.234131 | C | -6.5894540000 | -0.8331330000 | -0.5230170000 |
| H | -6.153225 | 0.682499  | -3.134401 | H | -5.6328960000 | -2.6409270000 | -1.1933200000 |
| C | -3.414483 | 0.209384  | -2.979602 | C | -6.4082940000 | 0.4431810000  | 0.0151710000  |
| H | -2.418938 | 0.271920  | -2.525011 | H | -4.9636540000 | 1.8930180000  | 0.6998790000  |
| H | -3.608135 | 1.157911  | -3.493713 | H | -7.5902370000 | -1.2008190000 | -0.7251750000 |
| H | -3.405801 | -0.592862 | -3.726601 | H | -7.2667250000 | 1.0730560000  | 0.2246760000  |
| O | 0.737487  | 1.797726  | -1.403311 | H | -3.8109730000 | -2.9792480000 | -2.5477590000 |
| C | 2.253231  | 3.459825  | -0.631771 | C | -1.7914910000 | -3.8207220000 | -2.1195980000 |
| C | 1.167902  | 4.184133  | -0.110566 | H | -0.8350730000 | -3.3269500000 | -1.9032930000 |
| C | 3.544307  | 4.000752  | -0.504720 | C | -1.7485120000 | -4.4834110000 | -3.5003490000 |
| C | 1.367300  | 5.406862  | 0.526950  | H | -1.5365660000 | -3.7527280000 | -4.2891950000 |
| H | 0.173955  | 3.766131  | -0.219403 | H | -0.9662330000 | -5.2483210000 | -3.5416960000 |
| C | 3.741977  | 5.226087  | 0.132111  | H | -2.7036550000 | -4.9667180000 | -3.7379920000 |
| H | 4.401142  | 3.476286  | -0.914179 | H | 2.4705670000  | 2.9168310000  | 2.1051540000  |
| C | 2.655523  | 5.932809  | 0.653363  | H | 3.9625500000  | 1.0904560000  | 1.8865210000  |
| H | 0.516652  | 5.949442  | 0.926381  | H | -1.8997030000 | -4.5955070000 | -1.3459240000 |
| H | 4.744643  | 5.632080  | 0.218390  | C | 0.7779330000  | 1.1096380000  | -2.7212420000 |
| H | 2.811662  | 6.884995  | 1.149239  | C | 0.5609530000  | 1.6981000000  | -3.9825720000 |
| H | 4.024569  | 1.547665  | -1.507331 | C | 2.0347950000  | 1.2689420000  | -2.1371580000 |
| C | 2.720533  | -0.057176 | -2.271294 | C | 1.5534570000  | 2.4446820000  | -4.6137080000 |
| C | 2.397721  | 0.267568  | -3.737692 | H | -0.4047050000 | 1.5660080000  | -4.4614880000 |
| H | 3.591991  | -0.720693 | -2.227602 | C | 3.0310970000  | 2.0274340000  | -2.7594930000 |
| H | 1.880558  | -0.604979 | -1.825012 | H | 2.2303160000  | 0.7885020000  | -1.1898790000 |
| H | 2.221052  | -0.651322 | -4.308567 | C | 2.7957260000  | 2.6231610000  | -3.9971090000 |
| H | 3.224355  | 0.807990  | -4.212642 | H | 1.3583610000  | 2.8909800000  | -5.5834390000 |
| H | 1.499145  | 0.889461  | -3.799565 | H | 3.9958350000  | 2.1431960000  | -2.2747150000 |
| H | -4.063120 | -1.337053 | 2.276857  | H | 3.5696720000  | 3.2090830000  | -4.4819160000 |



|   |           |           |          |   |               |               |               |
|---|-----------|-----------|----------|---|---------------|---------------|---------------|
| H | -2.804078 | -3.346749 | 1.948455 | H | -2.3784950000 | -1.7069340000 | -4.0162310000 |
|---|-----------|-----------|----------|---|---------------|---------------|---------------|

| TS1                                                                               |           |           |           | TS3                                                                                |           |           |           |
|-----------------------------------------------------------------------------------|-----------|-----------|-----------|------------------------------------------------------------------------------------|-----------|-----------|-----------|
| 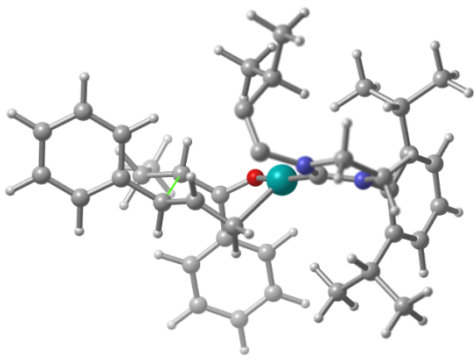 |           |           |           |  |           |           |           |
| Gas phase energy= -459.529216242                                                  |           |           |           | Gas phase energy= -459.533926723                                                   |           |           |           |
| Gas phase free energy correction= 0.866850                                        |           |           |           | Gas phase free energy correction= 0.870864                                         |           |           |           |
| SMD energy= -2100.62027722                                                        |           |           |           | SMD energy= -2100.62448381                                                         |           |           |           |
| C                                                                                 | 2.982461  | 1.629145  | -1.263027 | C                                                                                  | -2.327892 | 0.854122  | -0.814631 |
| C                                                                                 | 1.834150  | 2.380200  | -0.935965 | C                                                                                  | -2.451183 | 0.184860  | 0.416570  |
| C                                                                                 | 3.191997  | 0.422252  | 0.435940  | C                                                                                  | -1.896686 | -1.043051 | -2.128761 |
| H                                                                                 | 3.421678  | 1.294957  | 1.048077  | H                                                                                  | -1.746546 | -0.327345 | -2.931042 |
| C                                                                                 | 2.014864  | -0.288543 | 0.762159  | C                                                                                  | -0.750041 | -1.767731 | -1.706127 |
| C                                                                                 | 0.853547  | 0.262116  | 1.340612  | C                                                                                  | 0.605131  | -1.467172 | -2.114867 |
| H                                                                                 | 1.997755  | -1.350804 | 0.531925  | H                                                                                  | -0.921414 | -2.717973 | -1.205152 |
| H                                                                                 | 0.908356  | 1.287363  | 1.715425  | H                                                                                  | 0.755934  | -0.769312 | -2.940226 |
| Pd                                                                                | -0.450129 | 0.435846  | -0.389313 | Pd                                                                                 | 0.385458  | -0.517558 | -0.281759 |
| C                                                                                 | 4.380288  | -0.387748 | 0.046141  | C                                                                                  | -3.256265 | -1.600922 | -2.024749 |
| C                                                                                 | 5.639741  | -0.132505 | 0.606769  | C                                                                                  | -4.243783 | -1.209294 | -2.945058 |
| C                                                                                 | 4.263313  | -1.420973 | -0.898565 | C                                                                                  | -3.611246 | -2.503370 | -1.005558 |
| C                                                                                 | 6.751610  | -0.894886 | 0.243532  | C                                                                                  | -5.547635 | -1.696943 | -2.845908 |
| H                                                                                 | 5.744063  | 0.664224  | 1.338059  | H                                                                                  | -3.982740 | -0.521520 | -3.744727 |
| C                                                                                 | 5.372814  | -2.182748 | -1.261363 | C                                                                                  | -4.914956 | -2.978606 | -0.900625 |
| H                                                                                 | 3.297226  | -1.617627 | -1.354720 | H                                                                                  | -2.874559 | -2.797163 | -0.266102 |
| C                                                                                 | 6.623194  | -1.923466 | -0.692068 | C                                                                                  | -5.889387 | -2.578333 | -1.819289 |
| H                                                                                 | 7.717448  | -0.686699 | 0.692316  | H                                                                                  | -6.295483 | -1.383890 | -3.567044 |
| H                                                                                 | 5.265292  | -2.973305 | -1.997492 | H                                                                                  | -5.176408 | -3.647507 | -0.088093 |
| H                                                                                 | 7.487789  | -2.513281 | -0.978220 | H                                                                                  | -6.905152 | -2.948519 | -1.731754 |
| H                                                                                 | 0.231309  | -0.388970 | 1.947426  | H                                                                                  | 1.329952  | -2.280414 | -2.103125 |
| C                                                                                 | -2.871598 | -2.961357 | 0.816878  | C                                                                                  | 3.381645  | 2.149122  | 1.277173  |
| C                                                                                 | -3.923363 | -1.841043 | 0.779666  | C                                                                                  | 4.117863  | 0.805166  | 1.415728  |
| H                                                                                 | -3.003863 | -3.692905 | 0.010348  | H                                                                                  | 3.268259  | 2.672586  | 2.228586  |
| H                                                                                 | -4.770271 | -2.066725 | 0.126570  | H                                                                                  | 4.157685  | 0.455122  | 2.454903  |
| C                                                                                 | -1.805858 | -0.930313 | 0.205357  | C                                                                                  | 2.041473  | 0.431231  | 0.337179  |
| N                                                                                 | -1.610370 | -2.217264 | 0.607580  | N                                                                                  | 2.069358  | 1.722219  | 0.757521  |
| N                                                                                 | -3.141874 | -0.710922 | 0.247868  | N                                                                                  | 3.261643  | -0.094216 | 0.617834  |
| C                                                                                 | -3.767489 | 0.520436  | -0.126517 | C                                                                                  | 3.623663  | -1.451460 | 0.347365  |
| C                                                                                 | -3.862259 | 1.563857  | 0.809562  | C                                                                                  | 3.173878  | -2.471335 | 1.202354  |
| C                                                                                 | -4.265069 | 0.644295  | -1.437735 | C                                                                                  | 4.408872  | -1.718266 | -0.791546 |
| C                                                                                 | -4.498228 | 2.745898  | 0.412443  | C                                                                                  | 3.511634  | -3.792177 | 0.881602  |
| C                                                                                 | -4.890907 | 1.842591  | -1.794256 | C                                                                                  | 4.721844  | -3.050820 | -1.075538 |
| C                                                                                 | -5.012435 | 2.882956  | -0.874159 | C                                                                                  | 4.272148  | -4.079918 | -0.247630 |
| H                                                                                 | -4.581258 | 3.570078  | 1.114418  | H                                                                                  | 3.171756  | -4.601465 | 1.520621  |
| H                                                                                 | -5.275601 | 1.972434  | -2.800575 | H                                                                                  | 5.316184  | -3.293990 | -1.949476 |

|   |           |           |           |   |           |           |           |
|---|-----------|-----------|-----------|---|-----------|-----------|-----------|
| C | -0.356015 | -2.908757 | 0.549871  | C | 0.975367  | 2.629515  | 0.589775  |
| C | 0.198776  | -3.235031 | -0.704677 | C | 0.809029  | 3.268754  | -0.652259 |
| C | 0.290121  | -3.258583 | 1.753428  | C | 0.086846  | 2.837838  | 1.661481  |
| C | 1.428536  | -3.903501 | -0.728229 | C | -0.279364 | 4.133337  | -0.808652 |
| C | 1.512225  | -3.935559 | 1.679872  | C | -0.998224 | 3.696526  | 1.455694  |
| C | 2.083358  | -4.249173 | 0.450038  | C | -1.181004 | 4.338549  | 0.232934  |
| H | 1.882314  | -4.152313 | -1.682668 | H | -0.428055 | 4.642600  | -1.756427 |
| H | 2.033325  | -4.201272 | 2.593469  | H | -1.709769 | 3.861531  | 2.258006  |
| C | -0.485758 | -2.900199 | -2.023683 | C | 2.351853  | -2.177452 | 2.450117  |
| H | -1.393297 | -2.327538 | -1.808360 | H | 2.156521  | -1.100248 | 2.483955  |
| C | -0.307640 | -2.926502 | 3.114131  | C | 4.854110  | -0.584343 | -1.709417 |
| H | -1.111392 | -2.197382 | 2.950625  | H | 4.960227  | 0.317888  | -1.094914 |
| C | -4.049348 | -0.459336 | -2.464896 | C | 0.317927  | 2.194830  | 3.021577  |
| H | -3.796788 | -1.378556 | -1.922888 | H | 1.085739  | 1.422862  | 2.892547  |
| C | -3.257775 | 1.452839  | 2.201332  | C | 1.763018  | 3.022578  | -1.812955 |
| H | -2.810532 | 0.456914  | 2.296471  | H | 2.529192  | 2.316606  | -1.475408 |
| H | -5.499055 | 3.807489  | -1.166106 | H | 4.518086  | -5.109642 | -0.484947 |
| H | 3.043564  | -4.750983 | 0.409326  | H | -2.028670 | 5.000932  | 0.091685  |
| C | -2.122926 | 2.477439  | 2.385143  | C | 3.135047  | -2.552738 | 3.722688  |
| H | -1.637293 | 2.339942  | 3.357844  | H | 4.100967  | -2.036877 | 3.760738  |
| H | -2.504356 | 3.504443  | 2.339815  | H | 3.328375  | -3.631009 | 3.763225  |
| H | -1.366901 | 2.358403  | 1.601745  | H | 2.561137  | -2.279954 | 4.615390  |
| C | -4.327920 | 1.596882  | 3.298484  | C | 0.982359  | -2.877263 | 2.412499  |
| H | -5.121216 | 0.850748  | 3.178520  | H | 1.092251  | -3.968460 | 2.410628  |
| H | -4.792656 | 2.589113  | 3.271144  | H | 0.420804  | -2.578603 | 1.520723  |
| H | -3.876276 | 1.465809  | 4.288095  | H | 0.391689  | -2.595704 | 3.291131  |
| C | 0.716270  | -2.286411 | 4.070366  | C | 0.851524  | 3.245235  | 4.017880  |
| H | 1.471640  | -3.013129 | 4.389450  | H | 1.092925  | 2.773537  | 4.976946  |
| H | 0.209626  | -1.923044 | 4.971228  | H | 0.095935  | 4.018471  | 4.200603  |
| H | 1.235286  | -1.445951 | 3.600722  | H | 1.751111  | 3.743549  | 3.639052  |
| C | -0.914903 | -4.185949 | 3.765980  | C | -0.932090 | 1.497862  | 3.581713  |
| H | -1.640451 | -4.677132 | 3.109267  | H | -1.278658 | 0.725389  | 2.890609  |
| H | -1.415283 | -3.930172 | 4.706608  | H | -1.747669 | 2.208835  | 3.758193  |
| H | -0.127287 | -4.915497 | 3.987961  | H | -0.693789 | 1.028515  | 4.543442  |
| C | -0.911455 | -4.181993 | -2.764499 | C | 3.773041  | -0.278745 | -2.763216 |
| H | -1.559774 | -4.804889 | -2.138233 | H | 3.607456  | -1.150331 | -3.407321 |
| H | -0.039950 | -4.783576 | -3.047677 | H | 4.081823  | 0.562731  | -3.395050 |
| H | -1.456213 | -3.926167 | -3.680370 | H | 2.823002  | -0.029219 | -2.282239 |
| C | 0.405098  | -2.014726 | -2.911784 | C | 6.212972  | -0.843181 | -2.378512 |
| H | -0.132202 | -1.727081 | -3.821961 | H | 6.148292  | -1.641038 | -3.126731 |
| H | 1.317791  | -2.542190 | -3.214386 | H | 6.975502  | -1.123335 | -1.644299 |
| H | 0.690046  | -1.099230 | -2.380538 | H | 6.549124  | 0.060897  | -2.897531 |
| C | -5.302291 | -0.751843 | -3.306110 | C | 1.036355  | 2.364388  | -2.998079 |
| H | -6.166038 | -0.971240 | -2.669536 | H | 1.752765  | 2.089479  | -3.780346 |
| H | -5.123168 | -1.615725 | -3.955597 | H | 0.298318  | 3.045161  | -3.438250 |
| H | -5.562712 | 0.093850  | -3.951987 | H | 0.518402  | 1.458208  | -2.668528 |
| C | -2.843237 | -0.117129 | -3.360934 | C | 2.476565  | 4.316666  | -2.243390 |
| H | -1.940856 | 0.048791  | -2.759888 | H | 3.007228  | 4.773420  | -1.400935 |
| H | -3.034955 | 0.796944  | -3.934690 | H | 1.762328  | 5.053349  | -2.628836 |
| H | -2.643910 | -0.932498 | -4.066439 | H | 3.202147  | 4.105171  | -3.036842 |
| O | 0.673580  | 1.872386  | -1.270826 | H | -1.304910 | 1.174184  | -1.018562 |
| C | 1.781086  | 3.577298  | -0.053949 | C | -3.376242 | 1.660418  | -1.542857 |
| C | 0.535070  | 4.205825  | 0.130747  | C | -2.836419 | 2.297699  | -2.829056 |
| C | 2.885492  | 4.075247  | 0.658565  | H | -3.742278 | 2.471286  | -0.894358 |
| C | 0.400413  | 5.292626  | 0.989596  | H | -4.250290 | 1.041339  | -1.788147 |
| H | -0.320720 | 3.813211  | -0.404587 | H | -3.603585 | 2.912107  | -3.311982 |
| C | 2.748736  | 5.163760  | 1.522208  | H | -1.975034 | 2.935490  | -2.607052 |
| H | 3.859317  | 3.616587  | 0.552105  | H | -2.511922 | 1.543156  | -3.553843 |
| C | 1.507769  | 5.778231  | 1.691481  | C | -3.726198 | -0.142910 | 1.127518  |
| H | -0.570849 | 5.760127  | 1.115230  | C | -3.664288 | -1.130692 | 2.127485  |
| H | 3.615061  | 5.528617  | 2.064451  | C | -4.974196 | 0.433945  | 0.846575  |
| H | 1.403538  | 6.623217  | 2.363958  | C | -4.807714 | -1.547978 | 2.800876  |
| H | 2.723913  | 0.818316  | -1.943535 | H | -2.697363 | -1.565564 | 2.347089  |
| C | 4.380020  | 2.186966  | -1.497922 | C | -6.122543 | 0.014589  | 1.521489  |
| C | 4.395640  | 3.402278  | -2.438712 | H | -5.073132 | 1.212035  | 0.106275  |
| H | 4.888743  | 2.439740  | -0.559196 | C | -6.047807 | -0.981136 | 2.494270  |

|                                                                                   |                                                                                    |
|-----------------------------------------------------------------------------------|------------------------------------------------------------------------------------|
| H 4.986090 1.386417 -1.935794                                                     | H -4.733810 -2.317340 3.562717                                                     |
| H 5.423791 3.720191 -2.644819                                                     | H -7.077653 0.470962 1.283155                                                      |
| H 3.856316 4.250053 -2.003447                                                     | H -6.943461 -1.308109 3.012117                                                     |
| H 3.915558 3.156726 -3.391864                                                     | O -1.381946 -0.340566 0.956474                                                     |
| H -4.311333 -1.592829 1.774796                                                    | H 3.868291 2.824981 0.562681                                                       |
| H -2.858085 -3.495910 1.767562                                                    | H 5.136446 0.829955 1.022752                                                       |
| <b>TS2 (or TS-inner-branched)</b>                                                 |                                                                                    |
| <b>TS4</b>                                                                        |                                                                                    |
| 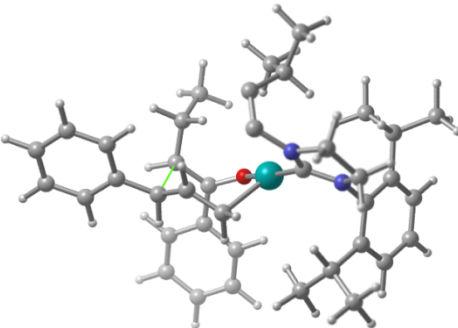 |  |
| Gas phase energy= -459.539803013                                                  | Gas phase energy= -459.537279738                                                   |
| Gas phase free energy correction= 0.869345                                        | Gas phase free energy correction= 0.868156                                         |
| SMD energy= -2100.63186908                                                        | SMD energy= -2100.62852628                                                         |
| C 3.003507 1.178005 -1.446355                                                     | C -2.702043 1.555400 -0.387758                                                     |
| C 1.987788 2.134230 -1.252318                                                     | C -2.690233 0.748114 0.755797                                                      |
| C 3.195684 0.478187 0.501530                                                      | C -2.480071 -0.205234 -1.828722                                                    |
| H 3.263117 1.479711 0.924458                                                      | H -2.121881 0.522174 -2.555343                                                     |
| C 2.053566 -0.264947 0.871096                                                     | C -1.528494 -1.142780 -1.377017                                                    |
| C 0.855215 0.302560 1.347197                                                      | C -0.144979 -1.149873 -1.742844                                                    |
| H 2.075261 -1.344365 0.748484                                                     | H -1.881237 -1.988404 -0.791438                                                    |
| H 0.891173 1.348168 1.663324                                                      | H 0.159718 -0.521594 -2.581273                                                     |
| Pd -0.443214 0.472884 -0.400432                                                   | Pd 0.196979 -0.164272 0.055594                                                     |
| C 4.525052 -0.189071 0.397138                                                     | C -3.925237 -0.515010 -1.941460                                                    |
| C 5.686064 0.566824 0.629243                                                      | C -4.744535 0.327909 -2.713065                                                     |
| C 4.670374 -1.545769 0.063064                                                     | C -4.523168 -1.610927 -1.298304                                                    |
| C 6.951954 -0.011770 0.537861                                                     | C -6.112743 0.092711 -2.830602                                                     |
| H 5.587553 1.618101 0.888138                                                      | H -4.298227 1.183072 -3.214985                                                     |
| C 5.936251 -2.124347 -0.028046                                                    | C -5.893098 -1.843063 -1.409791                                                    |
| H 3.792351 -2.151952 -0.134860                                                    | H -3.926272 -2.277349 -0.687486                                                    |
| C 7.083267 -1.362528 0.208717                                                     | C -6.695479 -0.994308 -2.173917                                                    |
| H 7.834964 0.590019 0.726852                                                      | H -6.724502 0.756316 -3.433217                                                     |
| H 6.028227 -3.174482 -0.286774                                                    | H -6.335135 -2.684183 -0.886905                                                    |
| H 8.066100 -1.815977 0.135542                                                     | H -7.761509 -1.176906 -2.257974                                                    |
| H 0.223620 -0.320654 1.975178                                                     | H 0.379568 -2.104707 -1.708864                                                     |
| C -2.933354 -2.764355 1.035236                                                    | C 4.270873 0.965143 0.812966                                                       |
| C -3.885676 -1.572985 1.220676                                                    | C 4.373445 -0.563176 0.954832                                                      |
| H -3.255548 -3.440852 0.233923                                                    | H 4.537955 1.497991 1.728593                                                       |
| H -4.852926 -1.712967 0.731908                                                    | H 4.422957 -0.881781 2.003527                                                      |
| C -1.838931 -0.785115 0.311738                                                    | C 2.186003 -0.011152 0.227178                                                      |
| N -1.673419 -2.097213 0.645788                                                    | N 2.838714 1.144819 0.510961                                                       |
| N -3.131038 -0.479341 0.581391                                                    | N 3.098382 -1.011064 0.359471                                                      |
| C -3.726795 0.803677 0.362969                                                     | C 2.807648 -2.391514 0.119202                                                      |
| C -3.592969 1.806436 1.337729                                                     | C 2.090338 -3.130435 1.075513                                                      |
| C -4.439839 1.013942 -0.832746                                                    | C 3.240087 -2.959055 -1.097345                                                     |
| C -4.215838 3.038000 1.103615                                                     | C 1.786457 -4.465586 0.779909                                                      |
| C -5.038601 2.261570 -1.031578                                                    | C 2.914501 -4.294827 -1.350694                                                     |
| C -4.933082 3.263558 -0.068010                                                    | C 2.188134 -5.040177 -0.421514                                                     |
| H -4.129095 3.830466 1.840706                                                     | H 1.227355 -5.057857 1.497530                                                      |
| H -5.582580 2.458752 -1.949338                                                    | H 3.224968 -4.762452 -2.278186                                                     |

|   |           |           |           |   |           |           |           |
|---|-----------|-----------|-----------|---|-----------|-----------|-----------|
| C | -0.496738 | -2.854739 | 0.338034  | C | 2.234317  | 2.440426  | 0.452607  |
| C | -0.195459 | -3.134999 | -1.010513 | C | 2.210027  | 3.126129  | -0.775457 |
| C | 0.326225  | -3.307488 | 1.388589  | C | 1.677488  | 2.988273  | 1.622210  |
| C | 0.983761  | -3.834868 | -1.290365 | C | 1.615301  | 4.391306  | -0.813684 |
| C | 1.482874  | -4.024647 | 1.062360  | C | 1.095379  | 4.258132  | 1.541055  |
| C | 1.818201  | -4.273801 | -0.266022 | C | 1.063113  | 4.954040  | 0.334963  |
| H | 1.245064  | -4.048164 | -2.321981 | H | 1.576616  | 4.937889  | -1.751342 |
| H | 2.137457  | -4.375670 | 1.853265  | H | 0.653024  | 4.700792  | 2.427865  |
| C | -1.132253 | -2.764368 | -2.154675 | C | 1.661339  | -2.532498 | 2.408253  |
| H | -1.949572 | -2.158537 | -1.750835 | H | 1.894568  | -1.462610 | 2.389760  |
| C | -0.025454 | -3.060534 | 2.849481  | C | 4.006114  | -2.122013 | -2.118935 |
| H | -0.805853 | -2.289448 | 2.873311  | H | 4.620381  | -1.402611 | -1.564208 |
| C | -4.491902 | -0.059384 | -1.911570 | C | 1.698414  | 2.238918  | 2.945807  |
| H | -4.245857 | -1.018735 | -1.440622 | H | 2.108668  | 1.240329  | 2.756216  |
| C | -2.776597 | 1.592040  | 2.603287  | C | 2.784218  | 2.511723  | -2.043944 |
| H | -2.307043 | 0.604509  | 2.536344  | H | 3.237566  | 1.550893  | -1.776786 |
| H | -5.404121 | 4.226088  | -0.236547 | H | 1.940352  | -6.074319 | -0.636169 |
| H | 2.727219  | -4.816980 | -0.502339 | H | 0.599502  | 5.933591  | 0.287603  |
| C | -1.641083 | 2.625466  | 2.709451  | C | 2.451516  | -3.169065 | 3.567923  |
| H | -0.982002 | 2.382211  | 3.550222  | H | 3.531420  | -3.054205 | 3.421637  |
| H | -2.034727 | 3.635743  | 2.871074  | H | 2.236130  | -4.240921 | 3.649037  |
| H | -1.043902 | 2.631494  | 1.792137  | H | 2.178226  | -2.696075 | 4.517722  |
| C | -3.669302 | 1.610198  | 3.857615  | C | 0.144666  | -2.653291 | 2.635930  |
| H | -4.461265 | 0.855974  | 3.790904  | H | -0.164985 | -3.701337 | 2.727169  |
| H | -4.147754 | 2.588263  | 3.984852  | H | -0.408020 | -2.190903 | 1.810989  |
| H | -3.073179 | 1.407225  | 4.754313  | H | -0.138956 | -2.134588 | 3.557952  |
| C | 1.166460  | -2.545129 | 3.676303  | C | 2.620624  | 2.944902  | 3.958637  |
| H | 1.935531  | -3.317103 | 3.792139  | H | 2.678328  | 2.368251  | 4.888489  |
| H | 0.828888  | -2.266788 | 4.680798  | H | 2.238029  | 3.942546  | 4.204013  |
| H | 1.633578  | -1.670854 | 3.214580  | H | 3.634769  | 3.064565  | 3.560326  |
| C | -0.589593 | -4.345731 | 3.490889  | C | 0.283199  | 2.046624  | 3.517404  |
| H | -1.434780 | -4.749341 | 2.923527  | H | -0.364093 | 1.526844  | 2.803671  |
| H | -0.920544 | -4.150532 | 4.517036  | H | -0.178526 | 3.009201  | 3.768453  |
| H | 0.183422  | -5.122242 | 3.525396  | H | 0.329289  | 1.452511  | 4.437465  |
| C | -1.754313 | -4.035353 | -2.766485 | C | 3.046834  | -1.300510 | -3.001012 |
| H | -2.262734 | -4.635243 | -2.003436 | H | 2.392577  | -1.962739 | -3.579531 |
| H | -0.986908 | -4.664582 | -3.231795 | H | 3.615031  | -0.678894 | -3.703187 |
| H | -2.483908 | -3.764797 | -3.538064 | H | 2.416388  | -0.647334 | -2.392095 |
| C | -0.440753 | -1.914300 | -3.231138 | C | 4.960438  | -2.953758 | -2.990148 |
| H | -1.142598 | -1.686439 | -4.040652 | H | 4.411362  | -3.596237 | -3.687495 |
| H | 0.419247  | -2.433063 | -3.669598 | H | 5.612506  | -3.587531 | -2.380169 |
| H | -0.090513 | -0.967233 | -2.807948 | H | 5.589910  | -2.288232 | -3.590380 |
| C | -5.882492 | -0.204050 | -2.550482 | C | 1.671965  | 2.217267  | -3.065043 |
| H | -6.655554 | -0.359034 | -1.790439 | H | 2.085556  | 1.716204  | -3.947610 |
| H | -5.892482 | -1.059974 | -3.234131 | H | 1.183170  | 3.141269  | -3.395493 |
| H | -6.153225 | 0.682499  | -3.134401 | H | 0.910956  | 1.568137  | -2.621683 |
| C | -3.414483 | 0.209384  | -2.979602 | C | 3.886613  | 3.393852  | -2.656298 |
| H | -2.418938 | 0.271920  | -2.525011 | H | 4.680002  | 3.595121  | -1.928417 |
| H | -3.608135 | 1.157911  | -3.493713 | H | 3.485618  | 4.357054  | -2.991831 |
| H | -3.405801 | -0.592862 | -3.726601 | H | 4.331812  | 2.896837  | -3.525481 |
| O | 0.737487  | 1.797726  | -1.403311 | H | -3.666238 | 1.887725  | -0.762281 |
| C | 2.253231  | 3.459825  | -0.631771 | C | -1.520276 | 2.408214  | -0.777295 |
| C | 1.167902  | 4.184133  | -0.110566 | C | -1.829374 | 3.356526  | -1.938181 |
| C | 3.544307  | 4.000752  | -0.504720 | H | -0.658931 | 1.772437  | -1.036742 |
| C | 1.367300  | 5.406862  | 0.526950  | H | -1.175119 | 2.984810  | 0.093555  |
| H | 0.173955  | 3.766131  | -0.219403 | H | -0.952266 | 3.962970  | -2.186426 |
| C | 3.741977  | 5.226087  | 0.132111  | H | -2.120486 | 2.803535  | -2.840255 |
| H | 4.401142  | 3.476286  | -0.914179 | H | -2.651359 | 4.036142  | -1.684276 |
| C | 2.655523  | 5.932809  | 0.653363  | C | -3.947496 | 0.179381  | 1.317999  |
| H | 0.516652  | 5.949442  | 0.926381  | C | -3.872664 | -1.008957 | 2.059800  |
| H | 4.744643  | 5.632080  | 0.218390  | C | -5.205786 | 0.756512  | 1.091829  |
| H | 2.811662  | 6.884995  | 1.149239  | C | -5.029456 | -1.622084 | 2.537488  |
| H | 4.024569  | 1.547665  | -1.507331 | H | -2.894471 | -1.438825 | 2.241969  |
| C | 2.720533  | -0.057176 | -2.271294 | C | -6.362706 | 0.144303  | 1.570502  |
| C | 2.397721  | 0.267568  | -3.737692 | H | -5.287874 | 1.684577  | 0.537499  |
| H | 3.591991  | -0.720693 | -2.227602 | C | -6.279986 | -1.050552 | 2.288887  |

|                                            |                                            |
|--------------------------------------------|--------------------------------------------|
| H 1.880558 -0.604979 -1.825012             | H -4.957133 -2.546852 3.101096             |
| H 2.221052 -0.651322 -4.308567             | H -7.329334 0.598181 1.379618              |
| H 3.224355 0.807990 -4.212642              | H -7.181834 -1.527841 2.658107             |
| H 1.499145 0.889461 -3.799565              | O -1.570876 0.294035 1.239564              |
| H -4.063120 -1.337053 2.276857             | H 4.883540 1.356350 -0.008849              |
| H -2.804078 -3.346749 1.948455             | H 5.229503 -0.988838 0.427696              |
| <b>T55</b>                                 |                                            |
| <b>T57</b>                                 |                                            |
|                                            |                                            |
|                                            |                                            |
| Gas phase energy= -459.529130298           | Gas phase energy= -459.525555033           |
| Gas phase free energy correction= 0.865495 | Gas phase free energy correction= 0.869088 |
| SMD energy= -2100.62294772                 | SMD energy= -2100.61694595                 |
| C -3.538268 -1.416249 -0.749392            | C 2.786873 -1.455579 -2.257830             |
| C -2.310795 -1.868730 -0.243362            | C 1.883875 -2.029718 -1.335212             |
| C -3.440967 0.641717 -0.311132             | C 2.866803 0.601433 -1.891889              |
| H -3.523378 0.514672 0.768658              | H 2.987373 0.706800 -2.968457              |
| C -2.232495 1.209864 -0.763039             | C 1.676584 1.162056 -1.347045              |
| C -1.061300 1.345219 0.012725              | C 0.403058 1.137895 -1.924868              |
| H -2.198174 1.582333 -1.785760             | H 1.757105 1.622711 -0.365555              |
| H -1.150648 1.235771 1.096368              | H 0.295288 0.750339 -2.938966              |
| Pd 0.244486 -0.320254 -0.458809            | Pd -0.552591 -0.441063 -0.708938           |
| C -4.720425 1.051619 -0.957795             | C 4.124366 0.840772 -1.130913              |
| C -5.832183 1.368127 -0.162891             | C 5.319743 1.147538 -1.798954              |
| C -4.855100 1.122876 -2.353937             | C 4.147677 0.764869 0.271962               |
| C -7.042326 1.751851 -0.742778             | C 6.500557 1.374922 -1.090870              |
| H -5.743958 1.310740 0.918463              | H 5.319867 1.213068 -2.883426              |
| C -6.063507 1.506395 -2.933684             | C 5.325768 0.993758 0.981441               |
| H -4.013543 0.860971 -2.988790             | H 3.238130 0.513181 0.807407               |
| C -7.163814 1.823175 -2.131527             | C 6.509420 1.298648 0.303783               |
| H -7.889774 1.994188 -0.109735             | H 7.413408 1.612230 -1.627433              |
| H -6.150408 1.552468 -4.014386             | H 5.321023 0.924631 2.064983               |
| H -8.104126 2.118028 -2.585107             | H 7.427895 1.472702 0.854425               |
| H -0.382432 2.138146 -0.286939             | H -0.303693 1.918567 -1.665151             |
| C 3.836842 1.834978 0.769338               | C -2.881391 2.270885 1.779388              |
| C 4.318837 0.997710 -0.427352              | C -3.982105 1.348727 1.230039              |
| H 4.258937 1.492585 1.721885               | H -2.697349 2.117916 2.849523              |
| H 5.154229 0.336781 -0.180935              | H -4.545666 0.836625 2.014526              |
| C 1.997002 0.601161 -0.086751              | C -1.892831 0.704243 0.289941              |
| N 2.377172 1.595571 0.759665               | N -1.694109 1.845297 1.006352              |
| N 3.115894 0.213719 -0.750802              | N -3.201222 0.381598 0.438428              |
| C 3.135274 -0.837415 -1.721933             | C -0.415298 2.438624 1.264846              |
| C 2.836992 -0.541171 -3.063530             | C 0.454978 1.819093 2.184099               |
| C 3.437820 -2.144398 -1.293668             | C -0.067389 3.638949 0.612936              |
| C 2.859575 -1.589883 -3.989137             | C 1.697921 2.417221 2.422229               |
| C 3.443337 -3.163999 -2.250521             | C 1.183685 4.202750 0.885748               |
| C 3.160588 -2.888752 -3.587240             | C 2.063813 3.594484 1.776558               |
| H 2.624628 -1.391641 -5.030379             | H 2.391359 1.950736 3.115378               |
| H 3.657275 -4.184517 -1.949388             | H 1.480112 5.118109 0.384646               |

|   |           |           |           |   |           |           |           |
|---|-----------|-----------|-----------|---|-----------|-----------|-----------|
| C | 1.546385  | 2.173066  | 1.772959  | C | -3.822478 | -0.756819 | -0.166748 |
| C | 1.057514  | 3.483033  | 1.598221  | C | -4.340574 | -0.643709 | -1.468035 |
| C | 1.249305  | 1.418380  | 2.923492  | C | -3.887396 | -1.958080 | 0.563606  |
| C | 0.248886  | 4.026207  | 2.601187  | C | -4.946062 | -1.770295 | -2.035217 |
| C | 0.425930  | 1.997317  | 3.896690  | C | -4.497760 | -3.061305 | -0.041455 |
| C | -0.071403 | 3.287741  | 3.738334  | C | -5.025907 | -2.967243 | -1.328130 |
| H | -0.147696 | 5.029866  | 2.486783  | H | -5.345230 | -1.714747 | -3.043293 |
| H | 0.172873  | 1.431220  | 4.787805  | H | -4.552385 | -4.006184 | 0.489180  |
| C | 3.686006  | -2.457902 | 0.175980  | C | -3.244312 | -2.078481 | 1.939204  |
| H | 3.857056  | -1.507923 | 0.696072  | H | -3.099139 | -1.064338 | 2.331130  |
| C | 2.452906  | 0.863606  | -3.503399 | C | -4.195871 | 0.639822  | -2.272361 |
| H | 2.525346  | 1.519600  | -2.628498 | H | -3.784197 | 1.407595  | -1.607266 |
| C | 1.802970  | 0.017316  | 3.145143  | C | 0.090659  | 0.537024  | 2.921009  |
| H | 2.376098  | -0.270894 | 2.257674  | H | -0.880251 | 0.190601  | 2.551117  |
| C | 1.399287  | 4.304838  | 0.362064  | C | -1.019674 | 4.333608  | -0.351323 |
| H | 1.816566  | 3.616453  | -0.383439 | H | -1.798212 | 3.609392  | -0.622144 |
| H | -0.710624 | 3.719204  | 4.501250  | C | -0.327567 | 4.789310  | -1.649212 |
| H | 3.164001  | -3.692222 | -4.315917 | H | 0.359443  | 5.622335  | -1.462807 |
| C | 0.989232  | 0.907792  | -3.979808 | H | -1.076391 | 5.137214  | -2.369234 |
| H | 0.703121  | 1.935871  | -4.230381 | H | 0.244882  | 3.978394  | -2.108271 |
| H | 0.317962  | 0.539154  | -3.195495 | C | -1.695331 | 5.542653  | 0.328883  |
| H | 0.846205  | 0.287495  | -4.872426 | H | -2.436305 | 5.994877  | -0.339852 |
| C | 3.411685  | 1.405737  | -4.578499 | H | -0.947335 | 6.305725  | 0.574059  |
| H | 4.450921  | 1.377001  | -4.232719 | H | -2.195555 | 5.261486  | 1.261222  |
| H | 3.157782  | 2.442683  | -4.825179 | C | -5.547485 | 1.152167  | -2.799067 |
| H | 3.348099  | 0.818028  | -5.501367 | H | -6.266561 | 1.287407  | -1.983840 |
| C | 2.465601  | 5.369145  | 0.693151  | H | -5.984585 | 0.453719  | -3.521588 |
| H | 2.065968  | 6.099898  | 1.406197  | H | -5.414549 | 2.113919  | -3.306807 |
| H | 2.766028  | 5.907566  | -0.212719 | C | -3.183797 | 0.444031  | -3.416739 |
| H | 3.358707  | 4.924485  | 1.144330  | H | -3.012399 | 1.390803  | -3.941754 |
| C | 0.165848  | 4.978620  | -0.266791 | H | -3.553542 | -0.288627 | -4.143848 |
| H | 0.441198  | 5.448605  | -1.217262 | H | -2.227813 | 0.081948  | -3.022652 |
| H | -0.235154 | 5.763860  | 0.383870  | C | -1.849626 | -2.722293 | 1.821511  |
| H | -0.635181 | 4.258632  | -0.457906 | H | -1.196832 | -2.129517 | 1.166984  |
| C | 0.679401  | -1.017472 | 3.306113  | H | -1.923436 | -3.730717 | 1.397390  |
| H | 0.055400  | -0.804285 | 4.181374  | H | -1.368338 | -2.794573 | 2.803611  |
| H | 1.100059  | -2.020116 | 3.433027  | C | -4.122463 | -2.839565 | 2.945859  |
| H | 0.035186  | -1.033534 | 2.420696  | H | -5.125734 | -2.404849 | 3.006786  |
| C | 2.762745  | -0.008558 | 4.350005  | H | -3.667640 | -2.799807 | 3.941674  |
| H | 2.233070  | 0.221395  | 5.281682  | H | -4.225738 | -3.896202 | 2.675644  |
| H | 3.568567  | 0.724794  | 4.233023  | C | -0.048111 | 0.788721  | 4.433975  |
| H | 3.211158  | -1.002926 | 4.455090  | H | -0.788056 | 1.569966  | 4.641157  |
| C | 2.436979  | -3.100212 | 0.809096  | H | 0.905802  | 1.106120  | 4.870694  |
| H | 2.605880  | -3.301429 | 1.873464  | H | -0.362214 | -0.129841 | 4.942260  |
| H | 2.194413  | -4.047618 | 0.313001  | C | 1.103424  | -0.580823 | 2.629881  |
| H | 1.567309  | -2.437704 | 0.720528  | H | 0.795426  | -1.519033 | 3.102779  |
| C | 4.932490  | -3.332765 | 0.390442  | H | 2.102343  | -0.332284 | 3.007324  |
| H | 4.799701  | -4.334270 | -0.033406 | H | 1.176487  | -0.759449 | 1.552253  |
| H | 5.126246  | -3.453057 | 1.461966  | H | 3.038846  | 4.032225  | 1.958863  |
| H | 5.817307  | -2.883951 | -0.073276 | H | -5.491421 | -3.834269 | -1.784443 |
| O | -1.235720 | -1.657720 | -0.958415 | H | 2.265679  | -1.290007 | -3.200404 |
| C | -2.116001 | -2.471919 | 1.105939  | C | 2.229334  | -2.718893 | -0.063201 |
| C | -1.177966 | -3.510036 | 1.234466  | C | 1.288137  | -3.619404 | 0.467889  |
| C | -2.794534 | -2.034189 | 2.252154  | C | 3.417775  | -2.499283 | 0.649715  |
| C | -0.943399 | -4.109470 | 2.468655  | C | 1.524959  | -4.274144 | 1.672883  |
| H | -0.636540 | -3.830269 | 0.351522  | H | 0.366735  | -3.782188 | -0.078395 |
| C | -2.553369 | -2.630453 | 3.491905  | C | 3.651741  | -3.150788 | 1.861845  |
| H | -3.498678 | -1.212694 | 2.187416  | H | 4.149210  | -1.790909 | 0.285535  |
| C | -1.633388 | -3.673363 | 3.603953  | C | 2.708988  | -4.040116 | 2.379185  |
| H | -0.219371 | -4.914027 | 2.547360  | H | 0.785169  | -4.965883 | 2.063146  |
| H | -3.080774 | -2.274497 | 4.370999  | H | 4.571955  | -2.955646 | 2.403015  |
| H | -1.451151 | -4.139063 | 4.566763  | H | 2.893054  | -4.545238 | 3.321652  |
| H | -3.490794 | -1.237892 | -1.822156 | C | 4.224434  | -1.902535 | -2.458907 |
| C | -4.887705 | -1.914452 | -0.259934 | C | 4.319175  | -3.375019 | -2.890742 |
| C | -5.060405 | -3.429067 | -0.464401 | H | 4.671128  | -1.268661 | -3.235808 |
| H | -5.671996 | -1.386832 | -0.812531 | H | 4.838185  | -1.742312 | -1.568858 |

|                                                                |                                                                                                                                                                                                                                                                                                                                                                                                                                                                                                                                                                                                                                                                                                                                                                                                                                                                                                                                                                                                                                                                                                                                                                                                                            |
|----------------------------------------------------------------|----------------------------------------------------------------------------------------------------------------------------------------------------------------------------------------------------------------------------------------------------------------------------------------------------------------------------------------------------------------------------------------------------------------------------------------------------------------------------------------------------------------------------------------------------------------------------------------------------------------------------------------------------------------------------------------------------------------------------------------------------------------------------------------------------------------------------------------------------------------------------------------------------------------------------------------------------------------------------------------------------------------------------------------------------------------------------------------------------------------------------------------------------------------------------------------------------------------------------|
| H -5.051295 -1.671287 0.796012                                 | H 5.358384 -3.656045 -3.094951                                                                                                                                                                                                                                                                                                                                                                                                                                                                                                                                                                                                                                                                                                                                                                                                                                                                                                                                                                                                                                                                                                                                                                                             |
| H -6.066022 -3.751164 -0.171544                                | H 3.731041 -3.555212 -3.797463                                                                                                                                                                                                                                                                                                                                                                                                                                                                                                                                                                                                                                                                                                                                                                                                                                                                                                                                                                                                                                                                                                                                                                                             |
| H -4.909110 -3.694925 -1.516454                                | H 3.934631 -4.034033 -2.104951                                                                                                                                                                                                                                                                                                                                                                                                                                                                                                                                                                                                                                                                                                                                                                                                                                                                                                                                                                                                                                                                                                                                                                                             |
| H -4.333530 -3.990635 0.132391                                 | O 0.607749 -1.882012 -1.593750                                                                                                                                                                                                                                                                                                                                                                                                                                                                                                                                                                                                                                                                                                                                                                                                                                                                                                                                                                                                                                                                                                                                                                                             |
| H 4.054934 2.898403 0.657758                                   | H -3.093209 3.328390 1.614323                                                                                                                                                                                                                                                                                                                                                                                                                                                                                                                                                                                                                                                                                                                                                                                                                                                                                                                                                                                                                                                                                                                                                                                              |
| H 4.609516 1.614695 -1.285891                                  | H -4.693605 1.876911 0.584424                                                                                                                                                                                                                                                                                                                                                                                                                                                                                                                                                                                                                                                                                                                                                                                                                                                                                                                                                                                                                                                                                                                                                                                              |
| <b>TS6</b> <span style="margin-left: 200px;"><b>TS8</b></span> |                                                                                                                                                                                                                                                                                                                                                                                                                                                                                                                                                                                                                                                                                                                                                                                                                                                                                                                                                                                                                                                                                                                                                                                                                            |
| Optimization leads to TS2.                                     | 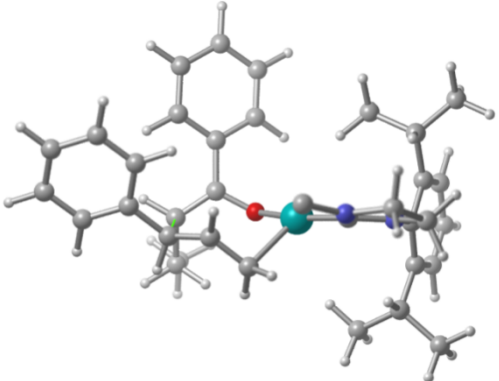                                                                                                                                                                                                                                                                                                                                                                                                                                                                                                                                                                                                                                                                                                                                                                                                                                                                                                                                                                                                                                                                                                                                         |
|                                                                | Gas phase energy= -459.530193342<br>Gas phase free energy correction= 0.869264<br>SMD energy= -2100.62263465                                                                                                                                                                                                                                                                                                                                                                                                                                                                                                                                                                                                                                                                                                                                                                                                                                                                                                                                                                                                                                                                                                               |
|                                                                | C 2.823580 -1.788182 -2.008590<br>C 1.846080 -2.216346 -1.085916<br>C 2.993130 0.264163 -1.765912<br>H 3.077939 0.313169 -2.848910<br>C 1.863358 0.943716 -1.233279<br>C 0.600340 1.012163 -1.832473<br>H 1.968703 1.422591 -0.262992<br>H 0.483390 0.633635 -2.849388<br>Pd -0.506092 -0.481138 -0.646363<br>C 4.303701 0.416838 -1.072283<br>C 5.494415 0.354531 -1.814643<br>C 4.397015 0.593940 0.318381<br>C 6.737601 0.474258 -1.193277<br>H 5.439544 0.210692 -2.890675<br>C 5.639316 0.716929 0.940249<br>H 3.495505 0.614238 0.921391<br>C 6.816094 0.658368 0.189252<br>H 7.644424 0.426196 -1.787340<br>H 5.688471 0.850899 2.016310<br>H 7.781547 0.752754 0.675036<br>H -0.040297 1.852576 -1.594505<br>C -2.792830 2.549358 1.498968<br>C -3.903842 1.617678 0.994069<br>H -2.647450 2.483672 2.584223<br>H -4.540729 1.231802 1.794058<br>C -1.805390 0.803020 0.226293<br>N -1.596376 2.018116 0.808327<br>N -3.125142 0.530027 0.376770<br>C -0.315245 2.617455 1.044843<br>C 0.526286 2.080170 2.039251<br>C 0.057266 3.757162 0.302153<br>C 1.763435 2.697338 2.262350<br>C 1.302569 4.339342 0.558942<br>C 2.153062 3.812604 1.527291<br>H 2.431975 2.295017 3.017293<br>H 1.615408 5.208560 -0.010136 |

|  |   |           |           |           |
|--|---|-----------|-----------|-----------|
|  | C | -3.751401 | -0.682771 | -0.052755 |
|  | C | -4.203289 | -0.799787 | -1.377367 |
|  | C | -3.889037 | -1.727852 | 0.881024  |
|  | C | -4.823552 | -1.996005 | -1.756254 |
|  | C | -4.511516 | -2.906841 | 0.460730  |
|  | C | -4.979481 | -3.037964 | -0.846119 |
|  | H | -5.174561 | -2.118241 | -2.776333 |
|  | H | -4.622970 | -3.734450 | 1.153597  |
|  | C | -3.304503 | -1.607975 | 2.282719  |
|  | H | -3.143247 | -0.542901 | 2.488811  |
|  | C | -3.985955 | 0.308243  | -2.396840 |
|  | H | -3.506369 | 1.148563  | -1.882121 |
|  | C | 0.144681  | 0.863093  | 2.870350  |
|  | H | -0.804515 | 0.470174  | 2.492798  |
|  | C | -0.866181 | 4.374291  | -0.740503 |
|  | H | -1.661447 | 3.647218  | -0.947584 |
|  | C | -0.149612 | 4.676082  | -2.069574 |
|  | H | 0.580810  | 5.484691  | -1.954393 |
|  | H | -0.878816 | 4.996936  | -2.821580 |
|  | H | 0.379238  | 3.798633  | -2.451972 |
|  | C | -1.513659 | 5.663846  | -0.193936 |
|  | H | -2.243409 | 6.060625  | -0.908583 |
|  | H | -0.748871 | 6.431497  | -0.027413 |
|  | H | -2.020551 | 5.493567  | 0.761459  |
|  | C | -5.315435 | 0.812529  | -2.985694 |
|  | H | -5.992297 | 1.159798  | -2.197350 |
|  | H | -5.828239 | 0.020896  | -3.543930 |
|  | H | -5.133506 | 1.643166  | -3.676682 |
|  | C | -3.019592 | -0.155081 | -3.502668 |
|  | H | -2.804163 | 0.669743  | -4.191651 |
|  | H | -3.451368 | -0.979002 | -4.083080 |
|  | H | -2.076151 | -0.501458 | -3.065270 |
|  | C | -1.924948 | -2.290876 | 2.342675  |
|  | H | -1.240621 | -1.858722 | 1.601629  |
|  | H | -2.015440 | -3.363609 | 2.133970  |
|  | H | -1.473387 | -2.168511 | 3.334166  |
|  | C | -4.242162 | -2.152007 | 3.372479  |
|  | H | -5.231009 | -1.685057 | 3.314694  |
|  | H | -3.820662 | -1.950311 | 4.363297  |
|  | H | -4.373525 | -3.236333 | 3.287811  |
|  | C | -0.060533 | 1.239859  | 4.349141  |
|  | H | -0.822495 | 2.019547  | 4.460183  |
|  | H | 0.868933  | 1.613504  | 4.794178  |
|  | H | -0.378509 | 0.360648  | 4.920983  |
|  | C | 1.184185  | -0.257839 | 2.717602  |
|  | H | 0.859650  | -1.163525 | 3.239278  |
|  | H | 2.156961  | 0.032122  | 3.131968  |
|  | H | 1.319908  | -0.513126 | 1.661913  |
|  | H | 3.121259  | 4.267793  | 1.703750  |
|  | H | -5.457065 | -3.960664 | -1.157997 |
|  | H | 3.851206  | -2.069949 | -1.783149 |
|  | C | 2.176404  | -2.736148 | 0.266113  |
|  | C | 1.180383  | -3.427565 | 0.976569  |
|  | C | 3.435783  | -2.570470 | 0.863015  |
|  | C | 1.430124  | -3.927352 | 2.250912  |
|  | H | 0.211251  | -3.558759 | 0.509782  |
|  | C | 3.679687  | -3.056830 | 2.148252  |
|  | H | 4.224174  | -2.041628 | 0.340857  |
|  | C | 2.680278  | -3.736157 | 2.847670  |
|  | H | 0.648921  | -4.462393 | 2.781783  |
|  | H | 4.653824  | -2.904047 | 2.601260  |
|  | H | 2.873951  | -4.117681 | 3.844809  |
|  | C | 2.475696  | -1.871989 | -3.486958 |
|  | C | 2.350063  | -3.324462 | -3.970321 |
|  | H | 1.531278  | -1.348406 | -3.670784 |
|  | H | 3.254221  | -1.362259 | -4.070399 |



|  |   |           |           |           |
|--|---|-----------|-----------|-----------|
|  | H | 2.156153  | -3.363027 | -5.048162 |
|  | H | 1.524276  | -3.824810 | -3.455276 |
|  | H | 3.270090  | -3.885388 | -3.769581 |
|  | O | 0.584951  | -2.068883 | -1.390110 |
|  | H | -2.963033 | 3.594392  | 1.236389  |
|  | H | -4.545282 | 2.092497  | 0.241897  |

| TS2a-Me                                                                           |           |           |           | TS4a-Me                                                                            |           |           |           |
|-----------------------------------------------------------------------------------|-----------|-----------|-----------|------------------------------------------------------------------------------------|-----------|-----------|-----------|
| 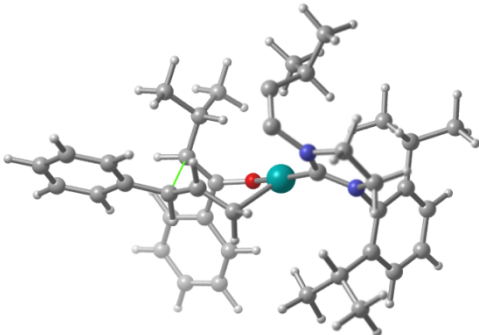 |           |           |           |  |           |           |           |
| Gas phase energy= -466.414582932                                                  |           |           |           | Gas phase energy= -466.417272253                                                   |           |           |           |
| Gas phase free energy correction= 0.897058                                        |           |           |           | Gas phase free energy correction= 0.895080                                         |           |           |           |
| SMD energy= -2139.94608978                                                        |           |           |           | SMD energy= -2139.94723377                                                         |           |           |           |
| C                                                                                 | 2.946574  | 0.842850  | -1.378103 | C                                                                                  | 2.689579  | -1.585619 | -0.882171 |
| C                                                                                 | 2.116724  | 1.965280  | -1.166847 | C                                                                                  | 2.658876  | -1.145799 | 0.453879  |
| C                                                                                 | 3.071768  | 0.243562  | 0.631086  | C                                                                                  | 2.638928  | 0.401403  | -1.774258 |
| H                                                                                 | 3.078612  | 1.261526  | 1.018446  | H                                                                                  | 2.304439  | -0.065861 | -2.697783 |
| C                                                                                 | 1.910383  | -0.495424 | 0.936678  | C                                                                                  | 1.692603  | 1.247457  | -1.154097 |
| C                                                                                 | 0.726781  | 0.083243  | 1.436168  | C                                                                                  | 0.317070  | 1.310266  | -1.484436 |
| H                                                                                 | 1.893813  | -1.560713 | 0.719412  | H                                                                                  | 2.037939  | 1.930292  | -0.381657 |
| H                                                                                 | 0.810609  | 1.086737  | 1.860987  | H                                                                                  | -0.005258 | 0.822695  | -2.406295 |
| Pd                                                                                | -0.499258 | 0.543788  | -0.299082 | Pd                                                                                 | -0.241894 | 0.019540  | 0.116715  |
| C                                                                                 | 4.433304  | -0.373822 | 0.698880  | C                                                                                  | 4.095830  | 0.702439  | -1.751672 |
| C                                                                                 | 5.563065  | 0.449944  | 0.560630  | C                                                                                  | 4.936828  | 0.071592  | -2.684128 |
| C                                                                                 | 4.638885  | -1.739702 | 0.949634  | C                                                                                  | 4.680362  | 1.569421  | -0.815219 |
| C                                                                                 | 6.852529  | -0.074936 | 0.637810  | C                                                                                  | 6.314019  | 0.287722  | -2.674911 |
| H                                                                                 | 5.422610  | 1.515690  | 0.398779  | H                                                                                  | 4.502331  | -0.605698 | -3.415617 |
| C                                                                                 | 5.928158  | -2.267367 | 1.021484  | C                                                                                  | 6.057823  | 1.783088  | -0.801649 |
| H                                                                                 | 3.788985  | -2.397452 | 1.099425  | H                                                                                  | 4.066689  | 2.063903  | -0.071856 |
| C                                                                                 | 7.041872  | -1.440425 | 0.860908  | C                                                                                  | 6.882592  | 1.143144  | -1.728127 |
| H                                                                                 | 7.708506  | 0.583142  | 0.529348  | H                                                                                  | 6.943053  | -0.212251 | -3.404429 |
| H                                                                                 | 6.063613  | -3.327175 | 1.212016  | H                                                                                  | 6.486824  | 2.441310  | -0.053832 |
| H                                                                                 | 8.043412  | -1.852895 | 0.921744  | H                                                                                  | 7.954795  | 1.307892  | -1.712625 |
| H                                                                                 | 0.052837  | -0.565291 | 1.989314  | H                                                                                  | -0.213214 | 2.235956  | -1.270862 |
| C                                                                                 | -3.260133 | -2.550574 | 0.933233  | C                                                                                  | -4.465772 | -0.344780 | 0.807409  |
| C                                                                                 | -4.099858 | -1.296196 | 1.215611  | C                                                                                  | -4.275167 | 1.165635  | 1.019477  |
| H                                                                                 | -3.651779 | -3.138373 | 0.093415  | H                                                                                  | -4.818023 | -0.861617 | 1.703411  |
| H                                                                                 | -5.086164 | -1.322038 | 0.746157  | H                                                                                  | -4.273499 | 1.442041  | 2.081201  |
| C                                                                                 | -2.008591 | -0.629726 | 0.310498  | C                                                                                  | -2.229815 | 0.238759  | 0.245042  |
| N                                                                                 | -1.951784 | -1.970653 | 0.566220  | N                                                                                  | -3.097456 | -0.780759 | 0.468540  |
| N                                                                                 | -3.267109 | -0.233749 | 0.621351  | N                                                                                  | -2.933007 | 1.387543  | 0.446217  |
| C                                                                                 | -3.770186 | 1.099053  | 0.481638  | C                                                                                  | -2.388282 | 2.700068  | 0.283894  |
| C                                                                                 | -3.548531 | 2.039253  | 1.501363  | C                                                                                  | -1.556685 | 3.240339  | 1.279744  |
| C                                                                                 | -4.499167 | 1.416928  | -0.680615 | C                                                                                  | -2.689128 | 3.399748  | -0.902811 |
| C                                                                                 | -4.096820 | 3.318270  | 1.347394  | C                                                                                  | -0.993680 | 4.502277  | 1.050191  |
| C                                                                                 | -5.022946 | 2.707526  | -0.798515 | C                                                                                  | -2.108100 | 4.657630  | -1.089075 |
| C                                                                                 | -4.829207 | 3.649314  | 0.210906  | C                                                                                  | -1.259945 | 5.200306  | -0.123604 |
| H                                                                                 | -3.940469 | 4.064731  | 2.120169  | H                                                                                  | -0.337554 | 4.939057  | 1.796617  |

|   |           |           |           |   |           |           |           |
|---|-----------|-----------|-----------|---|-----------|-----------|-----------|
| H | -5.578609 | 2.985380  | -1.687946 | H | -2.307259 | 5.218409  | -1.995282 |
| C | -0.851297 | -2.804794 | 0.181893  | C | -2.788441 | -2.171088 | 0.331552  |
| C | -0.604147 | -3.017668 | -1.190130 | C | -2.952195 | -2.784031 | -0.924437 |
| C | -0.048303 | -3.398012 | 1.176376  | C | -2.367763 | -2.892408 | 1.463005  |
| C | 0.516852  | -3.773728 | -1.548769 | C | -2.713839 | -4.158536 | -1.023336 |
| C | 1.047933  | -4.168365 | 0.769995  | C | -2.137817 | -4.265440 | 1.319717  |
| C | 1.343315  | -4.336342 | -0.580150 | C | -2.318266 | -4.895309 | 0.091345  |
| H | 0.740540  | -3.932474 | -2.598770 | H | -2.828470 | -4.656180 | -1.981499 |
| H | 1.684706  | -4.629904 | 1.517981  | H | -1.807923 | -4.844960 | 2.176427  |
| C | -1.552034 | -2.522938 | -2.276794 | C | -1.275646 | 2.510126  | 2.585767  |
| H | -2.304221 | -1.875671 | -1.814771 | H | -1.716367 | 1.510008  | 2.515499  |
| C | -0.363545 | -3.255784 | 2.659730  | C | -3.578683 | 2.771518  | -1.972667 |
| H | -1.078912 | -2.430904 | 2.767979  | H | -4.311753 | 2.133620  | -1.464633 |
| C | -4.644776 | 0.408455  | -1.812026 | C | -2.153236 | -2.217501 | 2.809569  |
| H | -4.457600 | -0.589556 | -1.397575 | H | -2.355361 | -1.147844 | 2.682353  |
| C | -2.717210 | 1.709775  | 2.731986  | C | -3.324083 | -1.976041 | -2.159614 |
| H | -2.313877 | 0.699222  | 2.605313  | H | -3.609001 | -0.969526 | -1.832487 |
| H | -5.243510 | 4.646278  | 0.105148  | H | -0.807453 | 6.172263  | -0.288620 |
| H | 2.211350  | -4.914343 | -0.878377 | H | -2.134756 | -5.960264 | -0.002715 |
| C | -1.514997 | 2.662940  | 2.853001  | C | -1.943410 | 3.240762  | 3.766890  |
| H | -0.851728 | 2.339432  | 3.662979  | H | -3.020626 | 3.357342  | 3.603980  |
| H | -1.837495 | 3.687916  | 3.070364  | H | -1.514457 | 4.240704  | 3.901348  |
| H | -0.944074 | 2.672687  | 1.918806  | H | -1.791114 | 2.680815  | 4.696307  |
| C | -3.574612 | 1.723794  | 4.010629  | C | 0.230612  | 2.317636  | 2.831655  |
| H | -4.408004 | 1.016396  | 3.936039  | H | 0.741880  | 3.278934  | 2.961607  |
| H | -3.995759 | 2.719789  | 4.190357  | H | 0.692748  | 1.782102  | 1.995190  |
| H | -2.967238 | 1.451598  | 4.881084  | H | 0.390144  | 1.726086  | 3.739886  |
| C | 0.872659  | -2.918158 | 3.512650  | C | -3.132398 | -2.761152 | 3.866857  |
| H | 1.576583  | -3.757436 | 3.544720  | H | -3.001801 | -2.228998 | 4.815693  |
| H | 0.567173  | -2.710359 | 4.544047  | H | -2.957337 | -3.826957 | 4.053605  |
| H | 1.404908  | -2.043530 | 3.128705  | H | -4.173316 | -2.644147 | 3.544509  |
| C | -1.026466 | -4.545162 | 3.189555  | C | -0.693104 | -2.350698 | 3.278267  |
| H | -1.906963 | -4.823482 | 2.600783  | H | 0.002711  | -1.934222 | 2.542486  |
| H | -1.331294 | -4.419429 | 4.234495  | H | -0.427331 | -3.400952 | 3.448330  |
| H | -0.319900 | -5.381842 | 3.139683  | H | -0.551592 | -1.814365 | 4.223629  |
| C | -2.292460 | -3.715904 | -2.914159 | C | -2.763222 | 1.854723  | -2.904237 |
| H | -2.811725 | -4.312710 | -2.156010 | H | -1.984692 | 2.425832  | -3.422993 |
| H | -1.593441 | -4.376331 | -3.440227 | H | -3.417822 | 1.401022  | -3.657838 |
| H | -3.031547 | -3.357992 | -3.639926 | H | -2.278413 | 1.052969  | -2.340258 |
| C | -0.841094 | -1.682304 | -3.346097 | C | -4.368641 | 3.807477  | -2.787601 |
| H | -1.552111 | -1.373306 | -4.119766 | H | -3.712395 | 4.395652  | -3.438416 |
| H | -0.037376 | -2.243439 | -3.836109 | H | -4.915002 | 4.498217  | -2.137050 |
| H | -0.408943 | -0.780794 | -2.901669 | H | -5.091694 | 3.296992  | -3.432672 |
| C | -6.051832 | 0.393063  | -2.430398 | C | -2.100179 | -1.820303 | -3.080781 |
| H | -6.822030 | 0.251343  | -1.664848 | H | -2.350343 | -1.206381 | -3.953666 |
| H | -6.131798 | -0.422783 | -3.157060 | H | -1.751857 | -2.797452 | -3.436450 |
| H | -6.269363 | 1.325468  | -2.962773 | H | -1.278164 | -1.339383 | -2.540883 |
| C | -3.568053 | 0.662414  | -2.884291 | C | -4.522984 | -2.575202 | -2.913778 |
| H | -2.564604 | 0.635097  | -2.444266 | H | -5.385725 | -2.696902 | -2.250007 |
| H | -3.707240 | 1.647341  | -3.344900 | H | -4.283081 | -3.556341 | -3.338535 |
| H | -3.624481 | -0.097832 | -3.671966 | H | -4.813537 | -1.918847 | -3.741698 |
| O | 0.820437  | 1.850255  | -1.181346 | H | 3.656090  | -1.875443 | -1.286953 |
| C | 2.668119  | 3.258253  | -0.678872 | C | 1.496375  | -2.268674 | -1.525786 |
| C | 1.847161  | 4.094559  | 0.094000  | C | 1.823778  | -2.744577 | -2.948904 |
| C | 3.985311  | 3.665346  | -0.947374 | H | 0.668643  | -1.543892 | -1.579526 |
| C | 2.337601  | 5.294989  | 0.605487  | H | 0.939357  | -3.194612 | -3.413299 |
| H | 0.824563  | 3.785096  | 0.277139  | H | 2.160991  | -1.927800 | -3.596890 |
| C | 4.473719  | 4.868648  | -0.438418 | H | 2.616086  | -3.503530 | -2.925523 |
| H | 4.624924  | 3.053292  | -1.575009 | C | 3.909255  | -0.817795 | 1.191617  |
| C | 3.653712  | 5.684901  | 0.344884  | C | 3.848344  | 0.122798  | 2.230737  |
| H | 1.693294  | 5.927199  | 1.207616  | C | 5.151779  | -1.375904 | 0.856315  |
| H | 5.491738  | 5.172890  | -0.658709 | C | 5.006508  | 0.522470  | 2.894763  |
| H | 4.035990  | 6.618889  | 0.743003  | H | 2.880971  | 0.535185  | 2.493161  |
| H | 4.010902  | 1.035897  | -1.495637 | C | 6.309525  | -0.978043 | 1.521841  |
| C | 2.425068  | -0.317057 | -2.211406 | H | 5.221411  | -2.117637 | 0.068736  |
| C | 2.131015  | 0.185273  | -3.640305 | C | 6.242812  | -0.021683 | 2.537558  |

|                                                                                                                                                                                                                                                                                                                                                                                                                                                                                                                                                                                                                                                                                                                                                                                                                                                                                                                                                                                                                                                                                                                |                                                                                                                                                                                                                                                                                                                                                           |
|----------------------------------------------------------------------------------------------------------------------------------------------------------------------------------------------------------------------------------------------------------------------------------------------------------------------------------------------------------------------------------------------------------------------------------------------------------------------------------------------------------------------------------------------------------------------------------------------------------------------------------------------------------------------------------------------------------------------------------------------------------------------------------------------------------------------------------------------------------------------------------------------------------------------------------------------------------------------------------------------------------------------------------------------------------------------------------------------------------------|-----------------------------------------------------------------------------------------------------------------------------------------------------------------------------------------------------------------------------------------------------------------------------------------------------------------------------------------------------------|
| <pre> H  1.481799  -0.662418  -1.765836 H  1.764062  -0.632613  -4.271089 H  3.044329  0.582115   -4.100780 H  1.376476  0.977495  -3.627074 C  3.389646  -1.508443  -2.261192 H  3.470040  -2.009181  -1.294892 H  3.032682  -2.245932  -2.989618 H  4.396752  -1.193046  -2.561888 H  -4.232031  -1.110418  2.288318 H  -3.172215  -3.205259  1.801363 </pre>                                                                                                                                                                                                                                                                                                                                                                                                                                                                                                                                                                                                                                                                                                                                                | <pre> H  4.946240  1.259798  3.688922 H  7.264835  -1.409806  1.243226 H  7.146156  0.291246  3.050869 O  1.538974  -0.785683  1.000566 C  0.989033  -3.450622  -0.678908 H  1.766875  -4.218014  -0.580773 H  0.699648  -3.116453  0.321037 H  0.110814  -3.905971  -1.149377 H  -5.151152  -0.575510  -0.017495 H  -5.028055  1.771006  0.510445 </pre> |
| <b>TS2b-Me</b>                                                                                                                                                                                                                                                                                                                                                                                                                                                                                                                                                                                                                                                                                                                                                                                                                                                                                                                                                                                                                                                                                                 | <b>TS4b-Me</b>                                                                                                                                                                                                                                                                                                                                            |
| 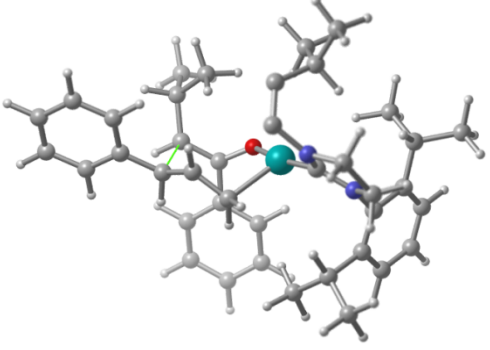                                                                                                                                                                                                                                                                                                                                                                                                                                                                                                                                                                                                                                                                                                                                                                                                                                                                                                                                                                                                                              | <p>Optimization leads to TS4a-Me.</p>                                                                                                                                                                                                                                                                                                                     |
| <pre> Gas phase energy=          -466.411246510 Gas phase free energy correction=  0.896751 SMD energy=                -2139.94285643 </pre>                                                                                                                                                                                                                                                                                                                                                                                                                                                                                                                                                                                                                                                                                                                                                                                                                                                                                                                                                                   |                                                                                                                                                                                                                                                                                                                                                           |
| <pre> C  3.089745  1.633840  -1.286003 C  1.808099  2.216402  -1.236852 C  3.145520  0.757726  0.606698 H  3.086541  1.740505  1.073873 C  2.054818  -0.098667  0.884639 C  0.781285  0.344183  1.290642 H  2.193516  -1.172082  0.779854 H  0.687102  1.394614  1.574488 Pd -0.432905  0.281944  -0.523464 C  4.531080  0.208947  0.593125 C  5.603276  1.053426  0.922691 C  4.816214  -1.122141  0.244803 C  6.917790  0.586225  0.913675 H  5.398531  2.086883  1.191245 C  6.129714  -1.590088  0.237609 H  4.011778  -1.793644  -0.037662 C  7.187431  -0.740335  0.571831 H  7.729790  1.256663  1.175694 H  6.329046  -2.621530  -0.034943 H  8.208220  -1.107624  0.563236 H  0.194576  -0.326817  1.912068 C  -2.859064  -2.873595  1.170280 C  -3.835634  -1.689678  1.279815 H  -3.181192  -3.618701  0.432584 H  -4.797030  -1.877377  0.795076 C  -1.813821  -0.929315  0.294267 N  -1.621786  -2.214723  0.704941 N  -3.101420  -0.620208  0.578059 C  -3.702068  0.652891  0.316816 C  -3.591117  1.677906  1.272217 C  -4.386119  0.836779  -0.899105 C  -4.200410  2.906492  0.992817 </pre> |                                                                                                                                                                                                                                                                                                                                                           |

|   |           |           |           |
|---|-----------|-----------|-----------|
| C | -4.970859 | 2.083346  | -1.144089 |
| C | -4.883252 | 3.108375  | -0.203936 |
| H | -4.131762 | 3.714585  | 1.714590  |
| H | -5.490692 | 2.259965  | -2.080017 |
| C | -0.423686 | -2.953218 | 0.432784  |
| C | -0.146219 | -3.333542 | -0.895294 |
| C | 0.453131  | -3.266554 | 1.490918  |
| C | 1.068210  | -3.977113 | -1.157051 |
| C | 1.648502  | -3.926631 | 1.184760  |
| C | 1.963385  | -4.262464 | -0.129999 |
| H | 1.314432  | -4.258628 | -2.175933 |
| H | 2.347272  | -4.167971 | 1.978799  |
| C | -1.138982 | -3.116233 | -2.031261 |
| H | -1.991622 | -2.549510 | -1.641781 |
| C | 0.108628  | -2.947245 | 2.939754  |
| H | -0.700455 | -2.205789 | 2.929977  |
| C | -4.430623 | -0.262931 | -1.950396 |
| H | -4.158111 | -1.204607 | -1.458891 |
| C | -2.826137 | 1.481530  | 2.572322  |
| H | -2.305046 | 0.519531  | 2.511139  |
| H | -5.343958 | 4.069076  | -0.407847 |
| H | 2.902763  | -4.757921 | -0.351368 |
| C | -1.753393 | 2.566783  | 2.763400  |
| H | -1.119575 | 2.327372  | 3.624363  |
| H | -2.204250 | 3.549629  | 2.943417  |
| H | -1.118098 | 2.643209  | 1.876751  |
| C | -3.784299 | 1.431933  | 3.777578  |
| H | -4.540265 | 0.648156  | 3.655630  |
| H | -4.309756 | 2.387016  | 3.894549  |
| H | -3.228644 | 1.236403  | 4.701487  |
| C | 1.284973  | -2.345756 | 3.728882  |
| H | 2.076951  | -3.085726 | 3.890158  |
| H | 0.939577  | -2.017994 | 4.715630  |
| H | 1.724076  | -1.486203 | 3.215257  |
| C | -0.403839 | -4.215352 | 3.655415  |
| H | -1.240168 | -4.677898 | 3.120771  |
| H | -0.730490 | -3.977179 | 4.673902  |
| H | 0.396486  | -4.961641 | 3.720821  |
| C | -1.674055 | -4.469427 | -2.540009 |
| H | -2.115283 | -5.053388 | -1.724656 |
| H | -0.870955 | -5.067806 | -2.985304 |
| H | -2.440597 | -4.309981 | -3.306695 |
| C | -0.541519 | -2.289162 | -3.178640 |
| H | -1.281047 | -2.158315 | -3.976098 |
| H | 0.341449  | -2.772174 | -3.611939 |
| H | -0.243458 | -1.299650 | -2.818961 |
| C | -5.829304 | -0.447927 | -2.561520 |
| H | -6.585418 | -0.605032 | -1.785036 |
| H | -5.833876 | -1.315878 | -3.229972 |
| H | -6.128542 | 0.423125  | -3.154895 |
| C | -3.377062 | 0.001895  | -3.042165 |
| H | -2.375463 | 0.088722  | -2.605241 |
| H | -3.594531 | 0.936873  | -3.571525 |
| H | -3.367510 | -0.814181 | -3.773585 |
| O | 0.759636  | 1.544341  | -1.619187 |
| C | 1.558274  | 3.503865  | -0.523653 |
| C | 0.227612  | 3.892619  | -0.287895 |
| C | 2.586912  | 4.337245  | -0.049611 |
| C | -0.065569 | 5.065843  | 0.402831  |
| H | -0.569324 | 3.253291  | -0.649826 |
| C | 2.292412  | 5.511210  | 0.645075  |
| H | 3.626571  | 4.085943  | -0.229350 |
| C | 0.965788  | 5.880361  | 0.876767  |
| H | -1.101684 | 5.338733  | 0.575611  |
| H | 3.101140  | 6.140955  | 1.001443  |
| H | 0.739629  | 6.793628  | 1.416951  |

|                                                                                                                                                                                                                                                                                                                                                                                                                                                                                                                                                                                                                                                                                                                                                                                                                                                                                                                                                                                           |                                                                                                                                                                                                                                                                                                                                                                                                                                                                                                                                                                                                                                                                                                                                                                                                                                                                                                                                                                                                |
|-------------------------------------------------------------------------------------------------------------------------------------------------------------------------------------------------------------------------------------------------------------------------------------------------------------------------------------------------------------------------------------------------------------------------------------------------------------------------------------------------------------------------------------------------------------------------------------------------------------------------------------------------------------------------------------------------------------------------------------------------------------------------------------------------------------------------------------------------------------------------------------------------------------------------------------------------------------------------------------------|------------------------------------------------------------------------------------------------------------------------------------------------------------------------------------------------------------------------------------------------------------------------------------------------------------------------------------------------------------------------------------------------------------------------------------------------------------------------------------------------------------------------------------------------------------------------------------------------------------------------------------------------------------------------------------------------------------------------------------------------------------------------------------------------------------------------------------------------------------------------------------------------------------------------------------------------------------------------------------------------|
| H 3.914247 2.311176 -1.065843<br>C 3.510473 0.603380 -2.327375<br>C 2.568492 -0.589302 -2.539331<br>H 4.478418 0.208244 -1.991438<br>H 3.077281 -1.360662 -3.131165<br>H 1.670831 -0.273245 -3.073516<br>H 2.244512 -1.036899 -1.595743<br>H -4.024038 -1.396376 2.319136<br>H -2.700964 -3.378291 2.124504<br>C 3.758049 1.322835 -3.670682<br>H 4.485800 2.134672 -3.560530<br>H 4.143448 0.617362 -4.416543<br>H 2.822085 1.748553 -4.050161                                                                                                                                                                                                                                                                                                                                                                                                                                                                                                                                           |                                                                                                                                                                                                                                                                                                                                                                                                                                                                                                                                                                                                                                                                                                                                                                                                                                                                                                                                                                                                |
| <b>TS2c-Me</b>                                                                                                                                                                                                                                                                                                                                                                                                                                                                                                                                                                                                                                                                                                                                                                                                                                                                                                                                                                            | <b>TS4c-Me</b>                                                                                                                                                                                                                                                                                                                                                                                                                                                                                                                                                                                                                                                                                                                                                                                                                                                                                                                                                                                 |
| 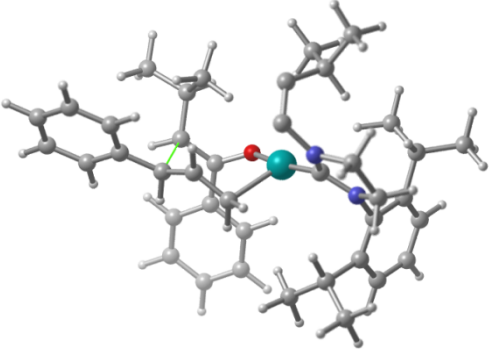                                                                                                                                                                                                                                                                                                                                                                                                                                                                                                                                                                                                                                                                                                                                                                                                                                                                                                        |                                                                                                                                                                                                                                                                                                                                                                                                                                                                                                                                                                                                                                                                                                                                                                                                                                                                                                             |
| Gas phase energy= -466.409914631<br>Gas phase free energy correction= 0.897083<br>SMD energy= -2139.94121615                                                                                                                                                                                                                                                                                                                                                                                                                                                                                                                                                                                                                                                                                                                                                                                                                                                                              | Gas phase energy= -466.407528073<br>Gas phase free energy correction= 0.894563<br>SMD energy= -2139.93931902                                                                                                                                                                                                                                                                                                                                                                                                                                                                                                                                                                                                                                                                                                                                                                                                                                                                                   |
| C 3.035935 1.374067 -1.443761<br>C 1.835589 2.110983 -1.366389<br>C 3.134370 0.719884 0.531185<br>H 3.078942 1.746304 0.892701<br>C 2.033128 -0.090886 0.893988<br>C 0.775952 0.407746 1.276070<br>H 2.136449 -1.170974 0.838411<br>H 0.707353 1.472727 1.507947<br>Pd -0.488684 0.333887 -0.530819<br>C 4.531660 0.188719 0.588882<br>C 5.599013 1.102903 0.577784<br>C 4.838704 -1.179016 0.666554<br>C 6.923782 0.671086 0.603942<br>H 5.382237 2.167764 0.546610<br>C 6.164407 -1.613825 0.691496<br>H 4.043997 -1.915533 0.712137<br>C 7.214183 -0.694175 0.651622<br>H 7.728342 1.398843 0.588725<br>H 6.376695 -2.676688 0.745953<br>H 8.243534 -1.036167 0.667648<br>H 0.165531 -0.220649 1.918710<br>C -2.961470 -2.757819 1.200605<br>C -3.902733 -1.548988 1.336161<br>H -3.315309 -3.486863 0.461375<br>H -4.879508 -1.708945 0.872710<br>C -1.879175 -0.836798 0.319771<br>N -1.713816 -2.128306 0.721334<br>N -3.155176 -0.497393 0.621868<br>C -3.740236 0.780718 0.351509 | C 3.171293 -1.460315 -1.313034<br>C 2.553230 -1.598245 -0.054771<br>C 2.950637 0.613981 -1.575705<br>H 2.658803 0.456631 -2.613480<br>C 1.968282 1.257594 -0.780406<br>C 0.608427 1.397890 -1.113286<br>H 2.291197 1.697488 0.161528<br>H 0.314900 1.185763 -2.143371<br>Pd -0.313728 -0.276371 -0.074710<br>C 4.386349 0.988929 -1.418752<br>C 5.217206 1.002662 -2.551267<br>C 4.954232 1.299382 -0.171918<br>C 6.572765 1.315675 -2.445052<br>H 4.791609 0.766196 -3.523129<br>C 6.309888 1.607968 -0.065786<br>H 4.346285 1.274685 0.726516<br>C 7.126679 1.618288 -1.199460<br>H 7.195104 1.322971 -3.334171<br>H 6.730300 1.830155 0.909478<br>H 8.181523 1.856481 -1.111827<br>H 0.076475 2.235172 -0.671157<br>C -4.470787 -0.109537 0.892852<br>C -4.160944 1.382935 1.095914<br>H -4.805356 -0.605210 1.807905<br>H -4.128197 1.665431 2.155029<br>C -2.219401 0.312977 0.235110<br>N -3.161908 -0.637883 0.470749<br>N -2.811026 1.505771 0.507375<br>C -2.179552 2.782424 0.393523 |

|   |           |           |           |   |           |           |           |
|---|-----------|-----------|-----------|---|-----------|-----------|-----------|
| C | -3.590255 | 1.822246  | 1.282940  | C | -1.352282 | 3.243442  | 1.431229  |
| C | -4.454925 | 0.950007  | -0.849251 | C | -2.407680 | 3.536313  | -0.774751 |
| C | -4.197214 | 3.051088  | 0.999194  | C | -0.730752 | 4.488380  | 1.271914  |
| C | -5.035545 | 2.197235  | -1.099848 | C | -1.765924 | 4.772413  | -0.894228 |
| C | -4.913463 | 3.237477  | -0.180215 | C | -0.931610 | 5.242784  | 0.119853  |
| H | -4.100476 | 3.871377  | 1.703791  | H | -0.075922 | 4.864267  | 2.051951  |
| H | -5.578926 | 2.362973  | -2.024224 | H | -1.907891 | 5.372213  | -1.786257 |
| C | -0.546455 | -2.903794 | 0.420541  | C | -2.960709 | -2.037755 | 0.248095  |
| C | -0.309057 | -3.292839 | -0.913617 | C | -3.207272 | -2.564022 | -1.033491 |
| C | 0.334073  | -3.257072 | 1.462570  | C | -2.517697 | -2.843543 | 1.312359  |
| C | 0.860821  | -4.007203 | -1.192578 | C | -3.014769 | -3.934949 | -1.230128 |
| C | 1.488610  | -3.977910 | 1.136701  | C | -2.345338 | -4.211148 | 1.074745  |
| C | 1.758116  | -4.337813 | -0.181564 | C | -2.593044 | -4.753085 | -0.183844 |
| H | 1.075235  | -4.302591 | -2.214514 | H | -3.182841 | -4.365981 | -2.212337 |
| H | 2.186157  | -4.256770 | 1.920031  | H | -1.996801 | -4.854546 | 1.876541  |
| C | -1.301616 | -3.012983 | -2.037325 | C | -1.107764 | 2.423422  | 2.689047  |
| H | -2.090897 | -2.361324 | -1.648728 | H | -1.619859 | 1.462644  | 2.569094  |
| C | 0.031509  | -2.921040 | 2.917131  | C | -3.277155 | 2.982041  | -1.897642 |
| H | -0.752140 | -2.152938 | 2.920993  | H | -4.026736 | 2.322293  | -1.443643 |
| C | -4.532653 | -0.166850 | -1.880981 | C | -2.195284 | -2.256771 | 2.678548  |
| H | -4.281681 | -1.107113 | -1.375319 | H | -2.322552 | -1.170383 | 2.609370  |
| C | -2.784104 | 1.643767  | 2.560402  | C | -3.615390 | -1.671656 | -2.197306 |
| H | -2.273713 | 0.676176  | 2.499937  | H | -3.790377 | -0.663303 | -1.804542 |
| H | -5.372438 | 4.198254  | -0.387633 | H | -0.434608 | 6.200226  | 0.007169  |
| H | 2.664914  | -4.883425 | -0.419869 | H | -2.444245 | -5.814028 | -0.353984 |
| C | -1.696091 | 2.723066  | 2.693636  | C | -1.690337 | 3.122477  | 3.931043  |
| H | -1.033835 | 2.493817  | 3.535637  | H | -2.761577 | 3.317411  | 3.809621  |
| H | -2.132757 | 3.712810  | 2.871052  | H | -1.193392 | 4.082725  | 4.111744  |
| H | -1.091205 | 2.775520  | 1.783843  | H | -1.550705 | 2.497870  | 4.820459  |
| C | -3.700888 | 1.625244  | 3.798099  | C | 0.386688  | 2.110062  | 2.870806  |
| H | -4.464698 | 0.843907  | 3.716326  | H | 0.968382  | 3.018502  | 3.066549  |
| H | -4.216499 | 2.585821  | 3.913999  | H | 0.784741  | 1.629071  | 1.972116  |
| H | -3.115760 | 1.443467  | 4.706510  | H | 0.530734  | 1.428137  | 3.716909  |
| C | 1.243545  | -2.356182 | 3.678702  | C | -3.161361 | -2.780747 | 3.756733  |
| H | 2.023632  | -3.115016 | 3.807545  | H | -2.950314 | -2.306140 | 4.721657  |
| H | 0.934530  | -2.034098 | 4.679314  | H | -3.054495 | -3.864224 | 3.884473  |
| H | 1.685988  | -1.498716 | 3.164683  | H | -4.204804 | -2.575873 | 3.491757  |
| C | -0.506809 | -4.168739 | 3.649435  | C | -0.728710 | -2.521261 | 3.064948  |
| H | -1.366507 | -4.608076 | 3.132714  | H | -0.048756 | -2.207054 | 2.266729  |
| H | -0.807256 | -3.915195 | 4.672275  | H | -0.554335 | -3.587332 | 3.252613  |
| H | 0.271132  | -4.939138 | 3.705091  | H | -0.473174 | -1.975320 | 3.980521  |
| C | -1.967410 | -4.325897 | -2.495912 | C | -2.439799 | 2.112161  | -2.854725 |
| H | -2.447451 | -4.840920 | -1.656167 | H | -1.643588 | 2.706978  | -3.317451 |
| H | -1.229021 | -5.009806 | -2.930044 | H | -3.073574 | 1.705130  | -3.651248 |
| H | -2.728211 | -4.120363 | -3.257358 | H | -1.977418 | 1.276394  | -2.321152 |
| C | -0.661715 | -2.275773 | -3.224747 | C | -4.034670 | 4.072286  | -2.671102 |
| H | -1.410843 | -2.105258 | -4.005678 | H | -3.356215 | 4.686979  | -3.272929 |
| H | 0.157387  | -2.853795 | -3.667069 | H | -4.587827 | 4.733299  | -1.995745 |
| H | -0.263788 | -1.304208 | -2.914712 | H | -4.748633 | 3.609436  | -3.360771 |
| C | -5.937415 | -0.329085 | -2.484175 | C | -2.470264 | -1.562702 | -3.219882 |
| H | -6.694922 | -0.450759 | -1.702701 | H | -2.746081 | -0.882126 | -4.033467 |
| H | -5.965410 | -1.210913 | -3.133579 | H | -2.237745 | -2.541325 | -3.655770 |
| H | -6.216705 | 0.535831  | -3.095915 | H | -1.564783 | -1.181114 | -2.737156 |
| C | -3.477150 | 0.053171  | -2.981162 | C | -4.919370 | -2.147694 | -2.860963 |
| H | -2.470812 | 0.117637  | -2.550681 | H | -5.728957 | -2.230813 | -2.127733 |
| H | -3.671248 | 0.986955  | -3.521466 | H | -4.791714 | -3.127744 | -3.334378 |
| H | -3.494759 | -0.772621 | -3.701652 | H | -5.227987 | -1.440676 | -3.639126 |
| O | 0.709916  | 1.537617  | -1.676903 | H | 4.259039  | -1.457600 | -1.285286 |
| C | 1.761437  | 3.450069  | -0.720620 | C | 2.659254  | -2.092592 | -2.603326 |
| C | 0.501628  | 3.954310  | -0.353532 | C | 3.340115  | -1.358841 | 1.185935  |
| C | 2.899692  | 4.222349  | -0.430492 | C | 2.710883  | -0.724877 | 2.268275  |
| C | 0.384731  | 5.182117  | 0.293995  | C | 4.696024  | -1.702890 | 1.299559  |
| H | -0.378604 | 3.364595  | -0.583528 | C | 3.426965  | -0.409433 | 3.422040  |
| C | 2.781818  | 5.451037  | 0.219490  | H | 1.660052  | -0.476360 | 2.183579  |
| H | 3.884956  | 3.877480  | -0.725717 | C | 5.410053  | -1.397369 | 2.457098  |
| C | 1.524585  | 5.934878  | 0.587927  | H | 5.195652  | -2.211619 | 0.482303  |

|   |           |           |           |   |           |           |           |
|---|-----------|-----------|-----------|---|-----------|-----------|-----------|
| H | -0.597736 | 5.549509  | 0.572319  | C | 4.780792  | -0.740883 | 3.518542  |
| H | 3.672467  | 6.032378  | 0.434549  | H | 2.929608  | 0.095095  | 4.244402  |
| H | 1.434170  | 6.889940  | 1.094400  | H | 6.458220  | -1.667215 | 2.530706  |
| H | 3.952630  | 1.950798  | -1.345887 | H | 5.339741  | -0.496542 | 4.415819  |
| C | 3.153205  | 0.238144  | -2.468004 | O | 1.265701  | -1.641419 | 0.058219  |
| C | 2.595644  | -1.131696 | -2.050655 | C | 3.057278  | -3.583662 | -2.616390 |
| H | 2.546972  | 0.561137  | -3.327572 | H | 4.133632  | -3.711171 | -2.455580 |
| H | 2.522995  | -1.780018 | -2.932202 | H | 2.526094  | -4.118511 | -1.820614 |
| H | 1.600776  | -1.045201 | -1.608620 | H | 2.796807  | -4.046027 | -3.575772 |
| H | 3.249452  | -1.630535 | -1.330587 | H | -5.219784 | -0.285797 | 0.111440  |
| H | -4.059615 | -1.254322 | 2.380396  | H | -4.868187 | 2.043389  | 0.588517  |
| H | -2.802120 | -3.275381 | 2.147649  | H | 3.210355  | -1.601441 | -3.421838 |
| C | 4.610631  | 0.092796  | -2.941333 | C | 1.160181  | -1.949522 | -2.900421 |
| H | 4.681637  | -0.661418 | -3.733350 | H | 0.836370  | -0.905498 | -2.869490 |
| H | 4.996374  | 1.038589  | -3.339037 | H | 0.944420  | -2.342945 | -3.901463 |
| H | 5.261112  | -0.221063 | -2.116699 | H | 0.559670  | -2.497834 | -2.170784 |

| TS2a-Ph                                                                                                                                                                                                                                                                                                                                                                                                                                                                                                                                                                                                                                                                                                                                                                                                                                                             | TS4a-Ph                                                                                                                                                                                                                                                                                                                                                                                                                                                                                                                                                                                                                                                                                                                                                                                                                                                                               |
|---------------------------------------------------------------------------------------------------------------------------------------------------------------------------------------------------------------------------------------------------------------------------------------------------------------------------------------------------------------------------------------------------------------------------------------------------------------------------------------------------------------------------------------------------------------------------------------------------------------------------------------------------------------------------------------------------------------------------------------------------------------------------------------------------------------------------------------------------------------------|---------------------------------------------------------------------------------------------------------------------------------------------------------------------------------------------------------------------------------------------------------------------------------------------------------------------------------------------------------------------------------------------------------------------------------------------------------------------------------------------------------------------------------------------------------------------------------------------------------------------------------------------------------------------------------------------------------------------------------------------------------------------------------------------------------------------------------------------------------------------------------------|
|                                                                                                                                                                                                                                                                                                                                                                                                                                                                                                                                                                                                                                                                                                                                                                                                                                                                     |                                                                                                                                                                                                                                                                                                                                                                                                                                                                                                                                                                                                                                                                                                                                                                                                                                                                                       |
| Gas phase energy= -495.959478103<br>Gas phase free energy correction= 0.945066<br>SMD energy= -2331.68111117                                                                                                                                                                                                                                                                                                                                                                                                                                                                                                                                                                                                                                                                                                                                                        | Gas phase energy= -495.971169104<br>Gas phase free energy correction= 0.944111<br>SMD energy= -2331.6901434                                                                                                                                                                                                                                                                                                                                                                                                                                                                                                                                                                                                                                                                                                                                                                           |
| C 3.024910 -0.630254 0.514988<br>C 2.149692 -1.729312 0.637245<br>C 2.674583 -0.274355 -1.532694<br>H 2.550167 -1.328421 -1.778951<br>C 1.497224 0.491692 -1.646851<br>C 0.220194 -0.069962 -1.856642<br>H 1.554298 1.569664 -1.510373<br>H 0.190121 -1.089651 -2.247697<br>Pd -0.635326 -0.455991 0.101334<br>C 4.002539 0.237452 -1.996541<br>C 5.108356 -0.629324 -1.995531<br>C 4.182081 1.536312 -2.496880<br>C 6.358372 -0.203449 -2.442600<br>H 4.979527 -1.650730 -1.646646<br>C 5.433233 1.966144 -2.939314<br>H 3.337534 2.215150 -2.552837<br>C 6.529453 1.101796 -2.909079<br>H 7.196979 -0.891952 -2.431599<br>H 5.549688 2.976062 -3.319082<br>H 7.500887 1.436960 -3.256738<br>H -0.529078 0.583069 -2.296891<br>C -3.727177 2.383280 -0.871533<br>C -4.498261 1.071311 -1.084979<br>H -4.081917 2.941646 0.003839<br>H -5.437786 1.026897 -0.528848 | C -2.778342 0.890808 0.440035<br>C -2.406625 -0.119854 1.344052<br>C -2.605450 -0.283417 -1.361202<br>H -2.516188 0.647129 -1.917416<br>C -1.451064 -1.100073 -1.360695<br>C -0.162037 -0.685332 -1.768385<br>H -1.551275 -2.134960 -1.041180<br>H -0.080702 0.261500 -2.305389<br>Pd 0.532212 -0.288185 0.220787<br>C -3.978016 -0.857019 -1.402307<br>C -5.043581 -0.025271 -1.788758<br>C -4.265436 -2.183171 -1.045881<br>C -6.354000 -0.499919 -1.807690<br>H -4.836419 1.006708 -2.063244<br>C -5.576610 -2.657526 -1.061788<br>H -3.471068 -2.848597 -0.728849<br>C -6.627229 -1.819941 -1.439934<br>H -7.161096 0.160042 -2.109097<br>H -5.776533 -3.681580 -0.765091<br>H -7.646763 -2.191113 -1.448662<br>H 0.527737 -1.448029 -2.123036<br>C 4.721101 0.445085 0.769154<br>C 4.791503 -0.861622 -0.039532<br>H 5.129615 0.344667 1.777943<br>H 5.036189 -1.729684 0.584810 |

|   |           |           |           |   |           |           |           |
|---|-----------|-----------|-----------|---|-----------|-----------|-----------|
| C | -2.295462 | 0.555570  | -0.374019 | C | 2.529329  | -0.139114 | 0.049672  |
| N | -2.354189 | 1.895673  | -0.629234 | N | 3.268417  | 0.693810  | 0.826237  |
| N | -3.542936 | 0.068982  | -0.574825 | N | 3.410111  | -0.987928 | -0.545755 |
| C | -3.943577 | -1.289354 | -0.365254 | C | 3.030876  | -2.047186 | -1.428713 |
| C | -3.753477 | -2.240452 | -1.381832 | C | 2.490085  | -3.232432 | -0.900600 |
| C | -4.542747 | -1.622632 | 0.864576  | C | 3.189679  | -1.847819 | -2.814762 |
| C | -4.207350 | -3.545240 | -1.154860 | C | 2.079359  | -4.223519 | -1.801161 |
| C | -4.972630 | -2.939413 | 1.054307  | C | 2.769869  | -2.864796 | -3.677309 |
| C | -4.813904 | -3.891813 | 0.049344  | C | 2.212525  | -4.040411 | -3.174098 |
| H | -4.076630 | -4.299460 | -1.924583 | H | 1.647932  | -5.144705 | -1.422077 |
| H | -5.426690 | -3.227923 | 1.996616  | H | 2.868772  | -2.740304 | -4.749613 |
| C | -1.269213 | 2.786710  | -0.338679 | C | 2.723583  | 1.729576  | 1.650968  |
| C | -0.905464 | 2.997108  | 1.007529  | C | 2.563734  | 3.018142  | 1.109283  |
| C | -0.585364 | 3.416592  | -1.397408 | C | 2.374253  | 1.429397  | 2.980167  |
| C | 0.211041  | 3.798334  | 1.269920  | C | 2.048333  | 4.020664  | 1.936727  |
| C | 0.519779  | 4.217545  | -1.086145 | C | 1.862743  | 2.462341  | 3.773722  |
| C | 0.928222  | 4.390817  | 0.233851  | C | 1.703920  | 3.746104  | 3.258700  |
| H | 0.516633  | 3.967552  | 2.297568  | H | 1.900748  | 5.021019  | 1.542445  |
| H | 1.068752  | 4.707957  | -1.883662 | H | 1.579468  | 2.257573  | 4.801484  |
| C | -1.723099 | 2.439481  | 2.166893  | C | 2.351246  | -3.464201 | 0.597915  |
| H | -2.435730 | 1.710857  | 1.769054  | H | 2.646111  | -2.542318 | 1.110555  |
| C | -1.059928 | 3.296882  | -2.840261 | C | 3.746407  | -0.532094 | -3.350220 |
| H | -1.743529 | 2.440353  | -2.893126 | H | 4.476387  | -0.158482 | -2.622005 |
| C | -4.650342 | -0.601272 | 1.988337  | C | 2.538512  | 0.030950  | 3.557621  |
| H | -4.516541 | 0.395378  | 1.551388  | H | 2.870915  | -0.628392 | 2.747636  |
| C | -3.065109 | -1.889288 | -2.691765 | C | 2.868243  | 3.300335  | -0.355371 |
| H | -2.643663 | -0.883511 | -2.589907 | H | 3.479176  | 2.473994  | -0.738234 |
| H | -5.155019 | -4.908940 | 0.210133  | H | 1.881195  | -4.814668 | -3.857649 |
| H | 1.798731  | 4.998270  | 0.456795  | H | 1.299842  | 4.533279  | 3.886172  |
| C | -1.893757 | -2.843849 | -2.981359 | C | 3.293987  | -4.589366 | 1.065489  |
| H | -1.327075 | -2.495576 | -3.852005 | H | 4.336039  | -4.366554 | 0.810309  |
| H | -2.246277 | -3.858949 | -3.197365 | H | 3.030840  | -5.543961 | 0.595315  |
| H | -1.216464 | -2.891779 | -2.122591 | H | 3.222902  | -4.717174 | 2.151369  |
| C | -4.067665 | -1.871248 | -3.860931 | C | 0.895871  | -3.752666 | 1.005129  |
| H | -4.880690 | -1.160450 | -3.675788 | H | 0.527813  | -4.681508 | 0.553176  |
| H | -4.515610 | -2.861294 | -4.006121 | H | 0.240983  | -2.928812 | 0.699454  |
| H | -3.564789 | -1.586253 | -4.791826 | H | 0.823324  | -3.854692 | 2.093699  |
| C | 0.075057  | 3.046753  | -3.848267 | C | 3.620378  | 0.011558  | 4.654374  |
| H | 0.757415  | 3.902359  | -3.904795 | H | 3.772277  | -1.009426 | 5.022122  |
| H | -0.346094 | 2.899425  | -4.848875 | H | 3.324127  | 0.635336  | 5.505728  |
| H | 0.659721  | 2.159173  | -3.591087 | H | 4.577448  | 0.391385  | 4.278904  |
| C | -1.843431 | 4.565889  | -3.240408 | C | 1.205418  | -0.532023 | 4.081723  |
| H | -2.647199 | 4.787460  | -2.530371 | H | 0.431761  | -0.516970 | 3.307284  |
| H | -2.280925 | 4.450396  | -4.238379 | H | 0.842113  | 0.045906  | 4.939925  |
| H | -1.173981 | 5.433777  | -3.259669 | H | 1.343197  | -1.567533 | 4.414247  |
| C | -2.535793 | 3.568342  | 2.832343  | C | 2.636767  | 0.532010  | -3.456778 |
| H | -3.173934 | 4.083221  | 2.105295  | H | 1.856427  | 0.202477  | -4.152531 |
| H | -1.870128 | 4.314754  | 3.281384  | H | 3.050794  | 1.477731  | -3.825634 |
| H | -3.172918 | 3.160027  | 3.625077  | H | 2.172489  | 0.713181  | -2.483386 |
| C | -0.863611 | 1.701977  | 3.202731  | C | 4.479099  | -0.685077 | -4.692208 |
| H | -1.503589 | 1.236231  | 3.959348  | H | 3.782670  | -0.909177 | -5.507865 |
| H | -0.186045 | 2.384424  | 3.725679  | H | 5.229476  | -1.481467 | -4.652474 |
| H | -0.262267 | 0.915134  | 2.735011  | H | 4.985271  | 0.252274  | -4.946347 |
| C | -6.020461 | -0.617762 | 2.685247  | C | 1.560740  | 3.306318  | -1.167459 |
| H | -6.834549 | -0.497053 | 1.962568  | H | 1.764448  | 3.469236  | -2.232243 |
| H | -6.080032 | 0.198234  | 3.413671  | H | 0.885178  | 4.097793  | -0.822105 |
| H | -6.186046 | -1.554185 | 3.229027  | H | 1.047138  | 2.346122  | -1.050797 |
| C | -3.506178 | -0.809236 | 2.998586  | C | 3.662300  | 4.600195  | -0.561593 |
| H | -2.530522 | -0.750381 | 2.502545  | H | 4.579251  | 4.605203  | 0.037213  |
| H | -3.584807 | -1.793657 | 3.474189  | H | 3.072562  | 5.481577  | -0.286530 |
| H | -3.544621 | -0.044440 | 3.782895  | H | 3.937136  | 4.707436  | -1.616669 |
| O | 0.894866  | -1.553738 | 0.917379  | H | -3.838768 | 1.100548  | 0.338062  |
| C | 2.562424  | -3.101613 | 0.233580  | C | -1.851774 | 2.056013  | 0.129953  |
| C | 1.576037  | -4.004193 | -0.193931 | H | -0.928109 | 1.646518  | -0.306287 |
| C | 3.900926  | -3.526466 | 0.261021  | C | -3.409252 | -1.074405 | 1.888483  |
| C | 1.921400  | -5.290248 | -0.605435 | C | -2.983658 | -2.364981 | 2.237701  |



|   |           |           |           |   |           |           |           |
|---|-----------|-----------|-----------|---|-----------|-----------|-----------|
| H | 0.542517  | -3.676793 | -0.188855 | C | -4.767943 | -0.750792 | 2.017906  |
| C | 4.244991  | -4.815326 | -0.146920 | C | -3.900130 | -3.319470 | 2.674726  |
| H | 4.676677  | -2.858616 | 0.622209  | H | -1.929195 | -2.599842 | 2.148569  |
| C | 3.257244  | -5.699816 | -0.586833 | C | -5.683462 | -1.704194 | 2.458784  |
| H | 1.148575  | -5.974960 | -0.938721 | H | -5.117435 | 0.244748  | 1.768176  |
| H | 5.282245  | -5.132186 | -0.113001 | C | -5.254707 | -2.993953 | 2.781190  |
| H | 3.525699  | -6.701711 | -0.904621 | H | -3.559502 | -4.317672 | 2.930783  |
| H | 4.082479  | -0.855111 | 0.399465  | H | -6.732968 | -1.443745 | 2.544056  |
| C | 2.740172  | 0.642767  | 1.293460  | H | -5.969847 | -3.736828 | 3.118833  |
| H | 1.690562  | 0.922093  | 1.114274  | O | -1.156125 | -0.404641 | 1.528380  |
| C | 3.629567  | 1.816411  | 0.836881  | C | -1.427726 | 2.814713  | 1.405535  |
| H | 3.324181  | 2.184712  | -0.143435 | H | -2.298693 | 3.223246  | 1.930504  |
| H | 3.559976  | 2.653229  | 1.537856  | H | -0.893688 | 2.140003  | 2.081265  |
| H | 4.680898  | 1.512673  | 0.775400  | H | -0.758918 | 3.642833  | 1.149457  |
| H | -4.711952 | 0.877763  | -2.142735 | H | 5.229505  | 1.280083  | 0.272913  |
| H | -3.765236 | 3.041789  | -1.740417 | H | 5.510542  | -0.819974 | -0.860613 |
| C | 2.898893  | 0.440990  | 2.808950  | C | -2.473250 | 2.994570  | -0.891853 |
| C | 2.522849  | 1.487212  | 3.666142  | C | -1.863066 | 3.211978  | -2.133866 |
| C | 3.423059  | -0.720458 | 3.387800  | C | -3.677487 | 3.660103  | -0.616588 |
| C | 2.651838  | 1.377908  | 5.049050  | C | -2.436980 | 4.067188  | -3.078062 |
| H | 2.113163  | 2.397213  | 3.237242  | H | -0.931792 | 2.702366  | -2.363875 |
| C | 3.559756  | -0.834966 | 4.774646  | C | -4.254939 | 4.514202  | -1.556747 |
| H | 3.715622  | -1.555329 | 2.761574  | H | -4.166234 | 3.508616  | 0.341958  |
| C | 3.174715  | 0.210728  | 5.612261  | C | -3.636346 | 4.720779  | -2.793098 |
| H | 2.343043  | 2.199887  | 5.687541  | H | -1.948938 | 4.218321  | -4.035352 |
| H | 3.965789  | -1.748333 | 5.197218  | H | -5.187371 | 5.019166  | -1.326153 |
| H | 3.278772  | 0.118548  | 6.688318  | H | -4.085243 | 5.384293  | -3.524696 |

|                |                |
|----------------|----------------|
| <b>TS2b-Ph</b> | <b>TS4b-Ph</b> |
|----------------|----------------|

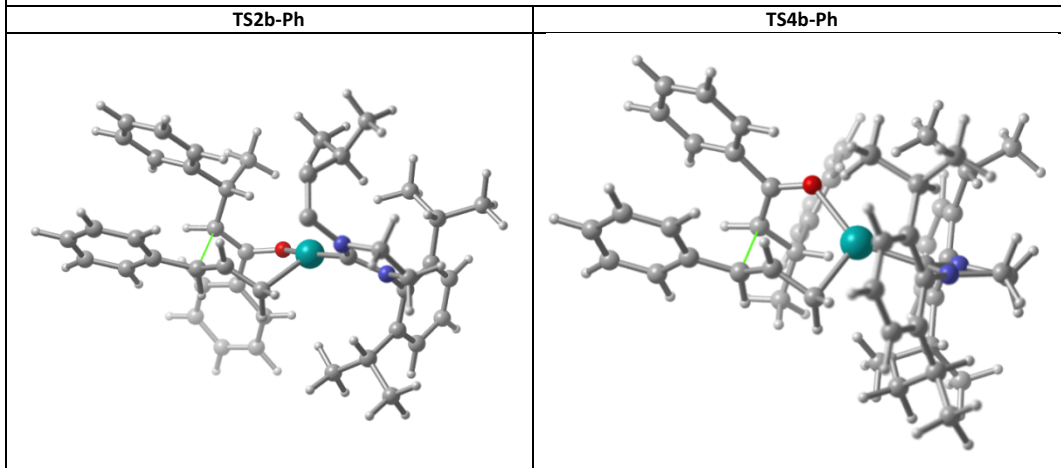

|                                   |                |                                   |                |
|-----------------------------------|----------------|-----------------------------------|----------------|
| Gas phase energy=                 | -495.970372296 | Gas phase energy=                 | -495.966434487 |
| Gas phase free energy correction= | 0.945457       | Gas phase free energy correction= | 0.944433       |
| SMD energy=                       | -2331.68980855 | SMD energy=                       | -2331.68522243 |
| C                                 | 2.547613       | 1.494591                          | -1.046823      |
| C                                 | 1.465003       | 2.400979                          | -1.008949      |
| C                                 | 2.593653       | 1.001337                          | 0.971446       |
| H                                 | 2.353180       | 2.008480                          | 1.310312       |
| C                                 | 1.585052       | 0.043349                          | 1.227632       |
| C                                 | 0.267653       | 0.382809                          | 1.588505       |
| H                                 | 1.809021       | -1.012662                         | 1.086908       |
| H                                 | 0.099156       | 1.400236                          | 1.949796       |
| Pd                                | -0.865830      | 0.493253                          | -0.270318      |
| C                                 | 4.043260       | 0.688193                          | 1.171761       |
| C                                 | 4.971538       | 1.742308                          | 1.141516       |
| C                                 | 4.520139       | -0.608143                         | 1.412318       |
| C                                 | 6.335013       | 1.506486                          | 1.310737       |
| H                                 | 4.613697       | 2.757402                          | 0.985970       |
| C                                 | 5.883456       | -0.845981                         | 1.578192       |
| C                                 | -2.790826      | 0.500811                          | -0.734096      |
| C                                 | -2.618085      | -0.045893                         | 0.550946       |
| C                                 | -2.172998      | -1.373092                         | -1.756545      |
| H                                 | -1.952809      | -0.792828                         | -2.646799      |
| C                                 | -1.054937      | -1.985288                         | -1.145167      |
| C                                 | 0.296341       | -1.726059                         | -1.487855      |
| H                                 | -1.230755      | -2.746373                         | -0.388836      |
| H                                 | 0.488616       | -1.177964                         | -2.411300      |
| Pd                                | 0.478126       | -0.362522                         | 0.121491       |
| C                                 | -3.509308      | -2.023765                         | -1.797578      |
| C                                 | -4.468905      | -1.547762                         | -2.707724      |
| C                                 | -3.866688      | -3.089498                         | -0.957345      |
| C                                 | -5.745360      | -2.103803                         | -2.766430      |
| H                                 | -4.207613      | -0.724626                         | -3.368632      |
| C                                 | -5.144836      | -3.643564                         | -1.011054      |

|   |           |           |           |   |           |           |           |
|---|-----------|-----------|-----------|---|-----------|-----------|-----------|
| H | 3.831133  | -1.442985 | 1.454199  | H | -3.156272 | -3.479020 | -0.238271 |
| C | 6.798912  | 0.206417  | 1.522505  | C | -6.091522 | -3.153506 | -1.912095 |
| H | 7.033918  | 2.336371  | 1.282074  | H | -6.469422 | -1.718771 | -3.477253 |
| H | 6.231032  | -1.860429 | 1.741729  | H | -5.403808 | -4.451616 | -0.335502 |
| H | 7.859555  | 0.017257  | 1.650584  | H | -7.086037 | -3.585150 | -1.950242 |
| H | -0.313592 | -0.367063 | 2.114974  | H | 1.031526  | -2.502356 | -1.281343 |
| C | -3.405739 | -2.756159 | 1.090149  | C | 4.423289  | 1.303639  | 0.562609  |
| C | -4.384915 | -1.573879 | 1.080239  | C | 4.700220  | -0.171076 | 0.895218  |
| H | -3.635326 | -3.501763 | 0.318685  | H | 4.665599  | 1.982447  | 1.383651  |
| H | -5.289232 | -1.767146 | 0.497555  | H | 4.805713  | -0.343256 | 1.973818  |
| C | -2.258442 | -0.818658 | 0.332232  | C | 2.443870  | 0.042387  | 0.194792  |
| N | -2.116534 | -2.100955 | 0.775759  | N | 2.969804  | 1.287607  | 0.316357  |
| N | -3.575679 | -0.516196 | 0.449968  | N | 3.470938  | -0.827028 | 0.405586  |
| C | -4.166203 | 0.727266  | 0.057625  | C | 3.342926  | -2.250061 | 0.334650  |
| C | -4.187652 | 1.803772  | 0.960071  | C | 2.733044  | -2.950739 | 1.389468  |
| C | -4.726386 | 0.822734  | -1.230399 | C | 3.816827  | -2.901771 | -0.822695 |
| C | -4.806406 | 2.991392  | 0.553273  | C | 2.569108  | -4.334838 | 1.248924  |
| C | -5.327007 | 2.029783  | -1.600567 | C | 3.634276  | -4.284398 | -0.919683 |
| C | -5.372492 | 3.103998  | -0.713704 | C | 3.006781  | -4.993862 | 0.104558  |
| H | -4.836275 | 3.839036  | 1.231126  | H | 2.091647  | -4.899360 | 2.043795  |
| H | -5.755708 | 2.137490  | -2.591615 | H | 3.976678  | -4.815538 | -1.800674 |
| C | -0.938334 | -2.903540 | 0.624841  | C | 2.218720  | 2.491578  | 0.135805  |
| C | -0.575212 | -3.352503 | -0.662220 | C | 2.031095  | 2.990297  | -1.165133 |
| C | -0.214663 | -3.290955 | 1.771581  | C | 1.675479  | 3.128483  | 1.265546  |
| C | 0.537430  | -4.193442 | -0.778343 | C | 1.246925  | 4.138410  | -1.322998 |
| C | 0.896540  | -4.125640 | 1.604701  | C | 0.916589  | 4.284790  | 1.064150  |
| C | 1.269302  | -4.576528 | 0.342041  | C | 0.691157  | 4.778676  | -0.218078 |
| H | 0.838102  | -4.549847 | -1.758729 | H | 1.062638  | 4.530782  | -2.318767 |
| H | 1.470803  | -4.431286 | 2.473328  | H | 0.460953  | 4.782847  | 1.913487  |
| C | -1.358729 | -2.981103 | -1.915546 | C | 2.276000  | -2.259789 | 2.666924  |
| H | -2.184335 | -2.324009 | -1.624394 | H | 2.398009  | -1.179934 | 2.531397  |
| C | -0.635704 | -2.876932 | 3.175539  | C | 4.467168  | -2.109851 | -1.954180 |
| H | -1.386197 | -2.083045 | 3.076598  | H | 4.983160  | -1.252171 | -1.506931 |
| C | -4.620361 | -0.328201 | -2.221428 | C | 1.870175  | 2.567145  | 2.667274  |
| H | -4.365314 | -1.233689 | -1.658113 | H | 2.541970  | 1.704210  | 2.590840  |
| C | -3.541519 | 1.711821  | 2.333847  | C | 2.637819  | 2.296721  | -2.376825 |
| H | -3.036046 | 0.742322  | 2.403619  | H | 3.252743  | 1.464925  | -2.015525 |
| H | -5.842671 | 4.033830  | -1.015412 | H | 2.862972  | -6.064700 | 0.008160  |
| H | 2.130323  | -5.227121 | 0.230902  | H | 0.057169  | 5.647654  | -0.355367 |
| C | -2.466000 | 2.797738  | 2.512456  | C | 3.155439  | -2.688116 | 3.857837  |
| H | -1.921254 | 2.643830  | 3.450584  | H | 4.214818  | -2.488869 | 3.661326  |
| H | -2.911217 | 3.799035  | 2.542980  | H | 3.047150  | -3.760276 | 4.058908  |
| H | -1.750422 | 2.764623  | 1.684957  | H | 2.861695  | -2.143243 | 4.761939  |
| C | -4.594641 | 1.781346  | 3.455197  | C | 0.786673  | -2.509089 | 2.959960  |
| H | -5.347543 | 0.993389  | 3.341940  | H | 0.589754  | -3.569394 | 3.158921  |
| H | -5.115755 | 2.745720  | 3.444466  | H | 0.167579  | -2.187820 | 2.115211  |
| H | -4.117761 | 1.666066  | 4.434943  | H | 0.475460  | -1.936561 | 3.840533  |
| C | 0.533009  | -2.320392 | 4.009536  | C | 2.532250  | 3.596177  | 3.601432  |
| H | 1.256783  | -3.105744 | 4.255158  | H | 2.732581  | 3.145526  | 4.579906  |
| H | 0.155349  | -1.916271 | 4.955266  | H | 1.880500  | 4.462616  | 3.760910  |
| H | 1.064931  | -1.521985 | 3.484644  | H | 3.478394  | 3.959911  | 3.185696  |
| C | -1.286101 | -4.063672 | 3.917472  | C | 0.544205  | 2.053830  | 3.256430  |
| H | -2.115443 | -4.497429 | 3.349193  | H | 0.097770  | 1.282070  | 2.620535  |
| H | -1.664870 | -3.743082 | 4.894334  | H | -0.180091 | 2.870995  | 3.359255  |
| H | -0.549472 | -4.858444 | 4.083225  | H | 0.711803  | 1.624751  | 4.251168  |
| C | -1.972197 | -4.228851 | -2.578084 | C | 3.407610  | -1.537288 | -2.914195 |
| H | -2.594015 | -4.789400 | -1.871202 | H | 2.828821  | -2.345258 | -3.376329 |
| H | -1.195446 | -4.905785 | -2.951334 | H | 3.889156  | -0.958736 | -3.711401 |
| H | -2.596660 | -3.933572 | -3.428854 | H | 2.713093  | -0.881351 | -2.382809 |
| C | -0.489355 | -2.191752 | -2.908183 | C | 5.521055  | -2.916683 | -2.729088 |
| H | -1.060129 | -1.957935 | -3.813355 | H | 5.061256  | -3.706268 | -3.333598 |
| H | 0.400467  | -2.758691 | -3.206154 | H | 6.247675  | -3.380479 | -2.053924 |
| H | -0.162406 | -1.247126 | -2.461445 | H | 6.061788  | -2.256477 | -3.415521 |
| C | -5.940832 | -0.603319 | -2.959512 | C | 1.546022  | 1.691191  | -3.273079 |
| H | -6.765897 | -0.748847 | -2.254089 | H | 1.994146  | 1.123288  | -4.096564 |
| H | -5.846623 | -1.506603 | -3.572222 | H | 0.912160  | 2.474245  | -3.704324 |

|   |           |           |           |   |           |           |           |
|---|-----------|-----------|-----------|---|-----------|-----------|-----------|
| H | -6.208772 | 0.220625  | -3.629926 | H | 0.909686  | 1.019413  | -2.688634 |
| C | -3.469514 | -0.071582 | -3.212732 | C | 3.555337  | 3.241486  | -3.172946 |
| H | -2.520429 | 0.070825  | -2.682854 | H | 4.339588  | 3.660359  | -2.533196 |
| H | -3.663969 | 0.830736  | -3.804085 | H | 2.990374  | 4.076576  | -3.602275 |
| H | -3.359818 | -0.917770 | -3.901255 | H | 4.032851  | 2.701471  | -3.998399 |
| O | 0.246042  | 1.976254  | -1.159136 | H | -3.802689 | 0.527088  | -1.131895 |
| C | 1.635968  | 3.807798  | -0.558099 | C | -1.909499 | 1.641285  | -1.241103 |
| C | 0.529042  | 4.478854  | -0.014479 | C | -1.946175 | 1.786134  | -2.767797 |
| C | 2.863611  | 4.485564  | -0.638012 | H | -0.867039 | 1.441563  | -0.947018 |
| C | 0.651593  | 5.783771  | 0.459466  | H | -1.424029 | 2.696079  | -3.079163 |
| H | -0.420841 | 3.958185  | 0.020833  | H | -1.442703 | 0.950231  | -3.258560 |
| C | 2.984009  | 5.792875  | -0.167001 | H | -2.975405 | 1.831854  | -3.144860 |
| H | 3.724850  | 4.003077  | -1.088130 | C | -3.719571 | -0.772677 | 1.235902  |
| C | 1.880391  | 6.444701  | 0.389045  | C | -3.389531 | -1.757671 | 2.178689  |
| H | -0.212109 | 6.285137  | 0.883598  | C | -5.071659 | -0.532185 | 0.950971  |
| H | 3.937406  | 6.305589  | -0.240790 | C | -4.386446 | -2.510849 | 2.795412  |
| H | 1.977045  | 7.460097  | 0.758514  | H | -2.342360 | -1.919733 | 2.406482  |
| H | 3.544703  | 1.925169  | -1.074153 | C | -6.068698 | -1.283990 | 1.569478  |
| C | 2.373918  | 0.196432  | -1.817971 | H | -5.349688 | 0.241993  | 0.245038  |
| C | 2.060571  | 0.476424  | -3.305989 | C | -5.729824 | -2.281103 | 2.486912  |
| H | 1.502942  | -0.318780 | -1.390956 | H | -4.117365 | -3.276475 | 3.516025  |
| H | 1.921197  | -0.467392 | -3.844971 | H | -7.110270 | -1.094045 | 1.333671  |
| H | 2.885649  | 1.019579  | -3.780937 | H | -6.507545 | -2.867870 | 2.964728  |
| H | 1.146987  | 1.071586  | -3.393920 | O | -1.439261 | -0.119869 | 1.090122  |
| H | -4.684006 | -1.265767 | 2.089225  | H | 4.954669  | 1.641926  | -0.335938 |
| H | -3.360942 | -3.261625 | 2.055749  | H | 5.587205  | -0.567567 | 0.397625  |
| C | 3.557169  | -0.747579 | -1.707868 | C | -2.330925 | 2.938471  | -0.529446 |
| C | 3.338252  | -2.084523 | -1.361442 | C | -2.146102 | 3.052020  | 0.857853  |
| C | 4.866157  | -0.334352 | -1.989295 | C | -2.900809 | 4.022723  | -1.208564 |
| C | 4.397291  | -2.990892 | -1.288057 | C | -2.514564 | 4.208171  | 1.540175  |
| H | 2.327991  | -2.409052 | -1.133145 | H | -1.697106 | 2.226883  | 1.397164  |
| C | 5.928550  | -1.233721 | -1.909482 | C | -3.264674 | 5.189279  | -0.526500 |
| H | 5.062115  | 0.700098  | -2.256532 | H | -3.068068 | 3.973578  | -2.278552 |
| C | 5.698792  | -2.567203 | -1.559579 | C | -3.072644 | 5.288634  | 0.850582  |
| H | 4.204961  | -4.024075 | -1.013850 | H | -2.360047 | 4.268413  | 2.613343  |
| H | 6.938566  | -0.892737 | -2.111112 | H | -3.705105 | 6.015948  | -1.075376 |
| H | 6.527085  | -3.265657 | -1.497739 | H | -3.358925 | 6.190934  | 1.381298  |
